# Supplementary material
Source: HighWire-hosted journal article supplement (https://erj.ersjournals.com/content/55/1/1900588)

## GRADE Evidence profiles and Evidence to Decision Frameworks, Severe Asthma Task Force.

| <b>Supporting Material Index</b>     |           |
|--------------------------------------|-----------|
| Pages.                               |           |
| GRADE evidence profiles PICO 1       | 2 – 20    |
| Evidence to decision framework PICO1 | 21 – 26   |
| GRADE evidence profiles PICO2        | 28 – 52   |
| Evidence to decision framework PICO2 | 53 – 57   |
| GRADE evidence profiles PICO3        | 59 – 69   |
| Evidence to decision framework PICO3 | 70 – 83   |
| GRADE evidence profiles PICO4        | 84 – 91   |
| Evidence to decision framework PICO4 | 92 - 96   |
| GRADE evidence profiles PICO5        | 97 – 102  |
| Evidence to decision framework PICO5 | 103 – 107 |
| GRADE evidence profiles PICO6        | 108 – 120 |
| Evidence to decision framework PICO6 | 121 – 127 |
| PRISMA Flow charts                   | 128 – 134 |

## Should a monoclonal anti-IL5 antibody be used in adults and children with severe asthma?

GRADE Evidence Profile: MEPOLIZUMAB

Bibliography<sup>a</sup>: Bel 2014, Chupp 2017, Ortega 2014

| Certainty assessment                                                                                                                                                                                              |                   |                      |               |                          |                          |                      | No of patients                                                                                                                                                                                                                                                                                                     |         | Effect            |                                                         | Certainty        | Importance |
|-------------------------------------------------------------------------------------------------------------------------------------------------------------------------------------------------------------------|-------------------|----------------------|---------------|--------------------------|--------------------------|----------------------|--------------------------------------------------------------------------------------------------------------------------------------------------------------------------------------------------------------------------------------------------------------------------------------------------------------------|---------|-------------------|---------------------------------------------------------|------------------|------------|
| No of studies                                                                                                                                                                                                     | Study design      | Risk of bias         | Inconsistency | Indirectness             | Imprecision              | Other considerations | Mepolizumab                                                                                                                                                                                                                                                                                                        | placebo | Relative (95% CI) | Absolute (95% CI)                                       |                  |            |
| Quality of life (change from baseline) (follow up: range 24 weeks to 32 weeks; assessed with: St George's Respiratory Questionnaire; Scale from: 0 to 100; higher scores indicate more limitations; MCID 4 units) |                   |                      |               |                          |                          |                      |                                                                                                                                                                                                                                                                                                                    |         |                   |                                                         |                  |            |
| 3 <sup>1,2,3</sup>                                                                                                                                                                                                | randomised trials | not serious          | not serious   | not serious <sup>b</sup> | not serious              | none                 | 537                                                                                                                                                                                                                                                                                                                | 534     | -                 | MD <b>7.14 lower</b><br>(9.07 lower to 5.21 lower)      | ⊕⊕⊕⊕<br>HIGH     | CRITICAL   |
| Asthma control (change from baseline) (follow up: range 24 weeks to 32 weeks; assessed with: Asthma Control Questionnaire (ACQ-5); Scale from: 0 to 6; lower values indicate better asthma control; MCID 0.5)     |                   |                      |               |                          |                          |                      |                                                                                                                                                                                                                                                                                                                    |         |                   |                                                         |                  |            |
| 3 <sup>1,2,3</sup>                                                                                                                                                                                                | randomised trials | not serious          | not serious   | not serious <sup>b</sup> | serious <sup>c</sup>     | none                 | 537                                                                                                                                                                                                                                                                                                                | 534     | -                 | MD <b>0.43 lower</b><br>(0.56 lower to 0.31 lower)      | ⊕⊕⊕○<br>MODERATE | CRITICAL   |
| Asthma symptoms (change from baseline) (follow up: 24 weeks; assessed with: Asthma symptom score; Scale from: 0 to 5; higher scores indicate more frequent symptoms and more limitations)                         |                   |                      |               |                          |                          |                      |                                                                                                                                                                                                                                                                                                                    |         |                   |                                                         |                  |            |
| 1 <sup>2</sup>                                                                                                                                                                                                    | randomised trials | serious <sup>d</sup> | not serious   | not serious <sup>e</sup> | not serious              | none                 | 266                                                                                                                                                                                                                                                                                                                | 259     | -                 | MD <b>0.2 units lower</b><br>(0.03 lower to 0.37 lower) | ⊕⊕⊕○<br>MODERATE | CRITICAL   |
| Lung function (Pre-bronchodilator FEV1 % predicted) (follow up: range 24 weeks to 32 weeks; MCID 10.38% <sup>4</sup> )                                                                                            |                   |                      |               |                          |                          |                      |                                                                                                                                                                                                                                                                                                                    |         |                   |                                                         |                  |            |
| 2 <sup>1,3</sup>                                                                                                                                                                                                  | randomised trials | serious <sup>f</sup> | not serious   | not serious <sup>b</sup> | not serious <sup>g</sup> | none                 | Graphs presenting results from Bel 2014 and Ortega 2014 showed the mepolizumab group had higher FEV1 % predicted than the placebo group at the end of the studies, however the 95% CI around the central estimate from each treatment arm overlap. This suggests the difference between groups in non-significant. |         |                   | ⊕⊕⊕○<br>MODERATE                                        | IMPORTANT        |            |

| Certainty assessment                                                                                                                         |                   |                      |               |                          |                          |                      | № of patients                                                                                                                                                                                                                                  |         | Effect                                   |                                                                            | Certainty    | Importance |
|----------------------------------------------------------------------------------------------------------------------------------------------|-------------------|----------------------|---------------|--------------------------|--------------------------|----------------------|------------------------------------------------------------------------------------------------------------------------------------------------------------------------------------------------------------------------------------------------|---------|------------------------------------------|----------------------------------------------------------------------------|--------------|------------|
| № of studies                                                                                                                                 | Study design      | Risk of bias         | Inconsistency | Indirectness             | Imprecision              | Other considerations | Mepolizumab                                                                                                                                                                                                                                    | placebo | Relative (95% CI)                        | Absolute (95% CI)                                                          |              |            |
| Lung function (Pre-bronchodilator FEV1 litres, change from baseline) (follow up: range 24 weeks to 32 weeks; MCID 0.23 litre <sup>4</sup> )  |                   |                      |               |                          |                          |                      |                                                                                                                                                                                                                                                |         |                                          |                                                                            |              |            |
| 2 <sup>1,2</sup>                                                                                                                             | randomised trials | not serious          | not serious   | not serious <sub>b</sub> | not serious <sub>h</sub> | none                 | 468                                                                                                                                                                                                                                            | 468     | -                                        | MD <b>0.11 higher</b><br>(0.06 higher to 0.17 higher)                      | ⊕⊕⊕⊕<br>HIGH | IMPORTANT  |
| Lung function (Post-bronchodilator FEV1 litres, change from baseline) (follow up: range 24 weeks to 32 weeks; MCID 0.23 litre <sup>4</sup> ) |                   |                      |               |                          |                          |                      |                                                                                                                                                                                                                                                |         |                                          |                                                                            |              |            |
| 3 <sup>1,2,3</sup>                                                                                                                           | randomised trials | serious <sup>i</sup> | not serious   | not serious <sub>b</sub> | not serious              | none                 | Ortega 2014 reported the mean difference from placebo (95%CI) = 0.138 L (0.043 to 0.232 L), P = 0.004. Two studies reported a non-significant difference favouring mepolizumab: Bel 2014, (0.128 L, P = 0.06) and Chupp 2017 (data not shown). |         |                                          | ⊕⊕⊕○<br>MODERATE                                                           | IMPORTANT    |            |
| Rate of any exacerbation (follow up: range 24 weeks to 32 weeks)                                                                             |                   |                      |               |                          |                          |                      |                                                                                                                                                                                                                                                |         |                                          |                                                                            |              |            |
| 3 <sup>1,2,3</sup>                                                                                                                           | randomised trials | not serious          | not serious   | not serious <sub>b</sub> | not serious              | none                 | 537                                                                                                                                                                                                                                            | 534     | <b>Rate ratio 0.50</b><br>(0.39 to 0.65) | Incidence rate (events/patient/year):<br>mepolizumab 0.92;<br>placebo 1.69 | ⊕⊕⊕⊕<br>HIGH | CRITICAL   |
| Time to first asthma exacerbation (follow up: 32 weeks)                                                                                      |                   |                      |               |                          |                          |                      |                                                                                                                                                                                                                                                |         |                                          |                                                                            |              |            |
| 1 <sup>1</sup>                                                                                                                               | randomised trials | not serious          | not serious   | not serious <sup>j</sup> | not serious              | none                 | <b>Hazard ratio</b> (95% CI) (mepolizumab/placebo) = 0.44 (0.32, 0.60), p <0.001. Number of patients: 194 (mepolizumab) and 191 (placebo).                                                                                                     |         |                                          | ⊕⊕⊕⊕<br>HIGH                                                               | CRITICAL     |            |
| Rate of exacerbations requiring emergency department visit or hospitalisation (follow up: range 24 weeks to 32 weeks)                        |                   |                      |               |                          |                          |                      |                                                                                                                                                                                                                                                |         |                                          |                                                                            |              |            |
| 2 <sup>1,2</sup>                                                                                                                             | randomised trials | not serious          | not serious   | not serious <sub>b</sub> | not serious              | none                 | 468                                                                                                                                                                                                                                            | 468     | <b>Rate ratio 0.36</b><br>(0.20 to 0.66) | Incidence rate (events/patient/year):<br>mepolizumab 0.05;<br>placebo 0.15 | ⊕⊕⊕⊕<br>HIGH | CRITICAL   |
| Rate of exacerbations requiring hospitalisation (follow up: range 24 weeks to 32 weeks)                                                      |                   |                      |               |                          |                          |                      |                                                                                                                                                                                                                                                |         |                                          |                                                                            |              |            |

| Certainty assessment                                                |                   |              |                          |                          |                            |                      | № of patients                                                                                                                                                                                                                                                                                              |                    | Effect                                        |                                                                                        | Certainty        | Importance |
|---------------------------------------------------------------------|-------------------|--------------|--------------------------|--------------------------|----------------------------|----------------------|------------------------------------------------------------------------------------------------------------------------------------------------------------------------------------------------------------------------------------------------------------------------------------------------------------|--------------------|-----------------------------------------------|----------------------------------------------------------------------------------------|------------------|------------|
| № of studies                                                        | Study design      | Risk of bias | Inconsistency            | Indirectness             | Imprecision                | Other considerations | Mepolizumab                                                                                                                                                                                                                                                                                                | placebo            | Relative (95% CI)                             | Absolute (95% CI)                                                                      |                  |            |
| 2 <sup>1,2</sup>                                                    | randomised trials | not serious  | not serious              | not serious <sup>b</sup> | not serious                | none                 | 468                                                                                                                                                                                                                                                                                                        | 468                | <b>Rate ratio 0.31</b><br>(0.13 to 0.73)      | Incidence rate (events/patient/year): mepolizumab 0.02; placebo 0.07 (from Chupp 2017) | ⊕⊕⊕⊕<br>HIGH     | CRITICAL   |
| Adverse events (follow up: range 24 weeks to 32 weeks)              |                   |              |                          |                          |                            |                      |                                                                                                                                                                                                                                                                                                            |                    |                                               |                                                                                        |                  |            |
| 3 <sup>1,2,3</sup>                                                  | randomised trials | not serious  | not serious              | not serious <sup>b</sup> | not serious <sup>k,l</sup> | none                 | 401/536<br>(74.8%)                                                                                                                                                                                                                                                                                         | 426/535<br>(79.6%) | <b>RR 0.93</b><br>(0.88 to 0.99) <sup>k</sup> | <b>56 fewer per 1,000</b><br>(from 8 fewer to 96 fewer)                                | ⊕⊕⊕⊕<br>HIGH     | CRITICAL   |
| Drug-related adverse events (follow up: range 24 weeks to 32 weeks) |                   |              |                          |                          |                            |                      |                                                                                                                                                                                                                                                                                                            |                    |                                               |                                                                                        |                  |            |
| 3 <sup>1,2,3</sup>                                                  | randomised trials | not serious  | not serious              | not serious <sup>b</sup> | not serious <sup>l</sup>   | none                 | 91/536<br>(17.0%)                                                                                                                                                                                                                                                                                          | 67/535<br>(12.5%)  | <b>RR 1.35</b><br>(1.01 to 1.80)              | <b>44 more per 1,000</b><br>(from 1 more to 100 more)                                  | ⊕⊕⊕⊕<br>HIGH     | CRITICAL   |
| Serious adverse events (follow up: range 24 weeks to 32 weeks)      |                   |              |                          |                          |                            |                      |                                                                                                                                                                                                                                                                                                            |                    |                                               |                                                                                        |                  |            |
| 3 <sup>1,2,3</sup>                                                  | randomised trials | not serious  | not serious <sup>m</sup> | not serious <sup>b</sup> | not serious <sup>n</sup>   | none                 | 32/536 (6.0%)                                                                                                                                                                                                                                                                                              | 62/535<br>(11.6%)  | <b>RR 0.50</b><br>(0.24 to 1.05)              | <b>58 fewer per 1,000</b><br>(from 88 fewer to 6 more)                                 | ⊕⊕⊕⊕<br>HIGH     | CRITICAL   |
| Systemic steroids (absolute final dose) (follow up: 24 weeks)       |                   |              |                          |                          |                            |                      |                                                                                                                                                                                                                                                                                                            |                    |                                               |                                                                                        |                  |            |
| 1 <sup>3</sup>                                                      | randomised trials | not serious  | not serious              | not serious              | serious <sup>o</sup>       | none                 | Prednisone dose (mg) at study weeks 20-24 were: placebo group, mean (standard deviation, SD) = 10.5 (7.8); median (range) = 10.0 (0-30). Mepolizumab group, mean (SD) = 8.6 (11.9); median (range) = 3.1 (0-67). No statistical test comparing results from the two groups has been reported. <sup>p</sup> |                    |                                               |                                                                                        | ⊕⊕⊕○<br>MODERATE | CRITICAL   |
| Systemic steroid (percent reduction) (follow up: 24 weeks)          |                   |              |                          |                          |                            |                      |                                                                                                                                                                                                                                                                                                            |                    |                                               |                                                                                        |                  |            |

| Certainty assessment                                                                                                                                  |                   |              |               |              |                      |                      | № of patients                                                                                                                                                                |         | Effect            |                   | Certainty        | Importance |
|-------------------------------------------------------------------------------------------------------------------------------------------------------|-------------------|--------------|---------------|--------------|----------------------|----------------------|------------------------------------------------------------------------------------------------------------------------------------------------------------------------------|---------|-------------------|-------------------|------------------|------------|
| № of studies                                                                                                                                          | Study design      | Risk of bias | Inconsistency | Indirectness | Imprecision          | Other considerations | Mepolizumab                                                                                                                                                                  | placebo | Relative (95% CI) | Absolute (95% CI) |                  |            |
| 1 <sup>3</sup>                                                                                                                                        | randomised trials | not serious  | not serious   | not serious  | serious <sup>o</sup> | none                 | Median percent reduction from baseline in daily oral glucocorticoid dose (95% CI): Placebo = 0.0 (-20.0 to 33.3), Mepolizumab = 50.0 (20.0 to 75.0), p = 0.007. <sup>q</sup> |         |                   |                   | ⊕⊕⊕○<br>MODERATE | CRITICAL   |
| Loss of work or school days, Intensive care unit admission, Non-invasive ventilation, Intubation, Comorbidities, Upper airway symptoms - not reported |                   |              |               |              |                      |                      |                                                                                                                                                                              |         |                   |                   |                  |            |
| -                                                                                                                                                     | -                 | -            | -             | -            | -                    | -                    | -                                                                                                                                                                            | -       | -                 | -                 | -                |            |

CI: Confidence interval; FEV1: forced expiratory volume in 1 second; MCID: minimal clinically important difference; MD: Mean difference; HR: Hazard Ratio; RR: Risk ratio

## Explanations

- The participants included in the three studies have been considered by the Task Force to represent a population of severe asthmatics as defined by the ERS/ATS Guidelines on Severe Asthma 2014<sup>5</sup>.
- Chupp 2017 and Ortega 2014 inclusion criteria for participants 12-17 years of age required treatment with inhaled corticosteroids at lower doses than those recommended by the ERS/ATS Guidelines on Severe Asthma 2014<sup>5</sup>. The proportion of included participants 12-17 years of age was not specified, however we have assumed this proportion was small relative to each study's total population and therefore we have not downgraded for indirectness.
- The ends of the 95% confidence interval include appreciable clinical benefit (MCID = 0.5) and no benefit and could lead to different clinical decisions.
- This outcome has been planned by Bel 2014 and Ortega 2014, as specified in the study protocols, but has not been reported.
- Chupp 2017 inclusion criteria for participants 12-17 years of age required treatment with inhaled corticosteroids at lower doses than those recommended by the ERS/ATS Guidelines on Severe Asthma 2014<sup>5</sup>. The proportion of included participants 12-17 years of age was not specified, however we have assumed this proportion was small relative to the total study population and therefore we have not downgraded for indirectness.
- This outcome has been reported incompletely by Bel 2014 and Ortega 2014 so that results cannot be entered in a meta-analysis (high risk of selective outcome reporting bias).
- The results of the primary studies have been presented in graphical format only and cannot be entered in a meta-analysis. As we have downgraded the rating of risk of bias for this same reason, we have decided not to downgrade the rating of imprecision.
- Bel 2014 reported the mean difference in pre-bronchodilator FEV1 between the mepolizumab and placebo groups to be 0.114 liters (p = 0.15). These results have been reported incompletely so that they cannot be entered in the meta-analysis. However the sample size on Bel 2014 is the smallest among the three included studies and the effect estimate (0.114) is very close to that from Chupp 2017 and Ortega 2014, so we considered it unlikely that inclusion of Bel's results would change the pooled effect estimate significantly.
- This outcome has been reported incompletely by Bel 2014 and Chupp 2017 so that results cannot be entered in a meta-analysis (high risk of selective outcome reporting bias).
- Ortega 2014 inclusion criteria for participants 12-17 years of age required treatment with inhaled corticosteroids at lower doses than those recommended by the ERS/ATS Guidelines on Severe Asthma 2014<sup>5</sup>. The proportion of included participants 12-17 years of age was not specified, however we have assumed this proportion was small relative to the total study population and therefore we have not downgraded for indirectness.

- k. There was a high incidence of adverse events in both mepolizumab and placebo groups. The apparent benefit from mepolizumab might be explained by a reduction of asthma-related adverse events with the active drug.
- l. This judgement was based on an arbitrary clinical decision threshold of 15% increase or decrease in absolute effect.
- m.  $I^2 = 57\%$  ( $P=0.10$ ) may represent moderate heterogeneity. However the point estimates from the 3 studies have the same direction of effect and the 95% confidence intervals overlap. For these reasons we have not rated down for inconsistency.
- n. This judgement was based on an arbitrary clinical decision threshold of 10% increase or decrease in absolute effect.
- o. Single study including only 135 patients.
- p. The mean and median from the mepolizumab group are very different (8.6 and 3.1). We have performed data checks ([http://handbook-5-1.cochrane.org/chapter\\_9/9\\_4\\_5\\_3\\_meta\\_analysis\\_of\\_skewed\\_data.htm](http://handbook-5-1.cochrane.org/chapter_9/9_4_5_3_meta_analysis_of_skewed_data.htm)) using the reported mean and standard deviations which indicate a skewed distribution. So we have not used the mean and standard deviation to calculate the mean difference in systemic steroid use.
- q. Bel 2014 reported the median difference and associated confidence intervals were calculated with the use of the Hodges–Lehman estimation. P values were calculated with the use of a Wilcoxon rank-sum test.

## References

1. Ortega HG, Liu MC, Pavord ID, et al. Mepolizumab treatment in patients with severe eosinophilic asthma. *N Engl J Med* 2014; 371: 1198-1207.
2. Chupp GL, Bradford ES, Albers FC, et al. Efficacy of mepolizumab add-on therapy on health-related quality of life and markers of asthma control in severe eosinophilic asthma (MUSCA): a randomised, double-blind, placebo-controlled, parallel-group, multicentre, phase 3b trial. *Lancet Respir Med* 2017; 5: 390–400.
3. Bel EH, Wenzel SE, Thompson PJ, et al. Oral glucocorticoid-sparing effect of mepolizumab in eosinophilic asthma. *N Engl J Med* 2014; 371: 1189-1197.
4. Santanello NC, Zhang J, Seidenberg B, Reiss TF, Barber BL. What are minimal important changes for asthma measures in a clinical trial? *Eur Respir J* 1999; 14: 23-27.
5. Chung KF, Wenzel SE, Brozek JL, et al. International ERS/ATS guidelines on definition, evaluation and treatment of severe asthma. *Eur Respir J* 2014; 43: 343-373.

GRADE Evidence Profile: RESLIZUMAB

Bibliography: Bjermer 2016, Castro 2011, Castro 2015, Corren 2016

| Certainty assessment                                                                                                                                                                                                    |                   |              |               |                      |                           |                      | No of patients |         | Effect            |                                                       | Certainty        | Importance |
|-------------------------------------------------------------------------------------------------------------------------------------------------------------------------------------------------------------------------|-------------------|--------------|---------------|----------------------|---------------------------|----------------------|----------------|---------|-------------------|-------------------------------------------------------|------------------|------------|
| No of studies                                                                                                                                                                                                           | Study design      | Risk of bias | Inconsistency | Indirectness         | Imprecision               | Other considerations | Reslizumab     | placebo | Relative (95% CI) | Absolute (95% CI)                                     |                  |            |
| Quality of life (change from baseline) (follow up: range 16 weeks to 52 weeks; assessed with: Asthma Quality of Life Questionnaire (AQLQ); Scale from: 1 to 7; higher values indicate better quality of life; MCID 0.5) |                   |              |               |                      |                           |                      |                |         |                   |                                                       |                  |            |
| 3 <sup>1,2</sup>                                                                                                                                                                                                        | randomised trials | not serious  | not serious   | serious <sup>a</sup> | not serious               | none                 | 576            | 577     | -                 | MD <b>0.28 higher</b><br>(0.17 higher to 0.39 higher) | ⊕⊕⊕○<br>MODERATE | CRITICAL   |
| Asthma control (change from baseline) (follow up: range 15 weeks to 52 weeks; assessed with: Asthma Control Questionnaire (ACQ-7); Scale from: 0 to 6; lower values indicate better asthma control; MCID 0.5)           |                   |              |               |                      |                           |                      |                |         |                   |                                                       |                  |            |
| 5 <sup>1,2,3,4</sup>                                                                                                                                                                                                    | randomised trials | not serious  | not serious   | serious <sup>b</sup> | not serious               | none                 | 1024           | 727     | -                 | MD <b>0.26 lower</b><br>(0.33 lower to 0.18 lower)    | ⊕⊕⊕○<br>MODERATE | CRITICAL   |
| Asthma control (change from baseline) (follow up: 15 weeks; assessed with: Asthma Control Questionnaire (ACQ-7); Scale from: 0 to 6; lower values indicate better asthma control; MCID 0.5)                             |                   |              |               |                      |                           |                      |                |         |                   |                                                       |                  |            |
| Study participants meet criteria for the diagnosis of severe asthma defined by the ERS/ATS Guidelines on Severe Asthma <sup>6</sup>                                                                                     |                   |              |               |                      |                           |                      |                |         |                   |                                                       |                  |            |
| 1 <sup>4</sup>                                                                                                                                                                                                          | randomised trials | not serious  | not serious   | not serious          | very serious <sup>c</sup> | none                 | 53             | 53      | -                 | MD <b>0.4 lower</b><br>(0.79 lower to 0.01 lower)     | ⊕⊕○○<br>LOW      | CRITICAL   |
| Asthma symptoms (change from baseline) (follow up: range 16 weeks to 52 weeks; assessed with: Asthma Symptom Utility Index; Scale from: 0 to 1; lower scores indicate worse asthma symptoms; MCID 0.09 <sup>7</sup> )   |                   |              |               |                      |                           |                      |                |         |                   |                                                       |                  |            |
| 3 <sup>1,2</sup>                                                                                                                                                                                                        | randomised trials | not serious  | not serious   | serious <sup>a</sup> | not serious               | none                 | 578            | 579     | -                 | MD <b>0.05 higher</b><br>(0.04 higher to 0.06 higher) | ⊕⊕⊕○<br>MODERATE | CRITICAL   |

| Certainty assessment                                                                                                                        |                   |              |               |                      |                           |                      | No of patients     |                    | Effect                           |                                                           | Certainty        | Importance |
|---------------------------------------------------------------------------------------------------------------------------------------------|-------------------|--------------|---------------|----------------------|---------------------------|----------------------|--------------------|--------------------|----------------------------------|-----------------------------------------------------------|------------------|------------|
| No of studies                                                                                                                               | Study design      | Risk of bias | Inconsistency | Indirectness         | Imprecision               | Other considerations | Reslizumab         | placebo            | Relative (95% CI)                | Absolute (95% CI)                                         |                  |            |
| Lung function (Pre-bronchodilator FEV1 % predicted, change from baseline) (follow up: 15 weeks; MCID 10.38% <sup>5</sup> )                  |                   |              |               |                      |                           |                      |                    |                    |                                  |                                                           |                  |            |
| Study participants meet criteria for the diagnosis of severe asthma defined by the ERS/ATS Guidelines on Severe Asthma <sup>6</sup>         |                   |              |               |                      |                           |                      |                    |                    |                                  |                                                           |                  |            |
| 1 <sup>4</sup>                                                                                                                              | randomised trials | not serious  | not serious   | not serious          | very serious <sup>d</sup> | none                 | 52                 | 52                 | -                                | MD <b>8.63 higher</b><br>(3.88 higher to 13.38 higher)    | ⊕⊕○○<br>LOW      | IMPORTANT  |
| Lung function (Pre-bronchodilator FEV1 litres, change from baseline) (follow up: range 15 weeks to 52 weeks; MCID 0.23 litre <sup>5</sup> ) |                   |              |               |                      |                           |                      |                    |                    |                                  |                                                           |                  |            |
| 5 <sup>1,2,3,4</sup>                                                                                                                        | randomised trials | not serious  | not serious   | serious <sup>b</sup> | not serious               | none                 | 1024               | 726                | -                                | MD <b>0.12 higher</b><br>(0.07 higher to 0.17 higher)     | ⊕⊕⊕○<br>MODERATE | IMPORTANT  |
| Lung function (Pre-bronchodilator FEV1 litres, change from baseline) (follow up: 15 weeks; MCID 0.23 litre <sup>5</sup> )                   |                   |              |               |                      |                           |                      |                    |                    |                                  |                                                           |                  |            |
| Study participants meet criteria for the diagnosis of severe asthma defined by the ERS/ATS Guidelines on Severe Asthma <sup>6</sup>         |                   |              |               |                      |                           |                      |                    |                    |                                  |                                                           |                  |            |
| 1 <sup>4</sup>                                                                                                                              | randomised trials | not serious  | not serious   | not serious          | very serious <sup>e</sup> | none                 | 52                 | 52                 | -                                | MD <b>0.24 higher</b><br>(0.09 higher to 0.39higher)      | ⊕⊕○○<br>LOW      | IMPORTANT  |
| Exacerbations (patients with ≥1 exacerbation) (follow up: range 15 weeks to 52 weeks)                                                       |                   |              |               |                      |                           |                      |                    |                    |                                  |                                                           |                  |            |
| 3 <sup>2,4</sup>                                                                                                                            | randomised trials | not serious  | not serious   | serious <sup>f</sup> | not serious               | none                 | 155/530<br>(29.2%) | 247/529<br>(46.7%) | RR <b>0.63</b><br>(0.53 to 0.76) | <b>173 fewer per 1,000</b><br>(from219fewer to 112 fewer) | ⊕⊕⊕○<br>MODERATE | CRITICAL   |
| Exacerbations (patients with ≥1 exacerbation) (follow up: 15 weeks)                                                                         |                   |              |               |                      |                           |                      |                    |                    |                                  |                                                           |                  |            |
| Study participants meet criteria for the diagnosis of severe asthma defined by the ERS/ATS Guidelines on Severe Asthma <sup>6</sup>         |                   |              |               |                      |                           |                      |                    |                    |                                  |                                                           |                  |            |



| Certainty assessment                                                                                                                             |                   |              |               |                      |                             |                      | No of patients |               | Effect                                   |                                                                           | Certainty        | Importance |
|--------------------------------------------------------------------------------------------------------------------------------------------------|-------------------|--------------|---------------|----------------------|-----------------------------|----------------------|----------------|---------------|------------------------------------------|---------------------------------------------------------------------------|------------------|------------|
| No of studies                                                                                                                                    | Study design      | Risk of bias | Inconsistency | Indirectness         | Imprecision                 | Other considerations | Reslizumab     | placebo       | Relative (95% CI)                        | Absolute (95% CI)                                                         |                  |            |
| 1 <sup>4</sup>                                                                                                                                   | randomised trials | not serious  | not serious   | not serious          | very serious <sup>g,h</sup> | none                 | 4/53 (7.5%)    | 10/53 (18.9%) | <b>RR 0.40</b><br>(0.13 to 1.20)         | <b>113 fewer per 1,000</b><br>(from 164 fewer to 38 more)                 | ⊕⊕○○<br>LOW      | CRITICAL   |
| <b>Rate of any exacerbation (follow up: 52 weeks)</b>                                                                                            |                   |              |               |                      |                             |                      |                |               |                                          |                                                                           |                  |            |
| 2 <sup>2</sup>                                                                                                                                   | randomised trials | not serious  | not serious   | serious <sup>f</sup> | not serious                 | none                 | 477            | 476           | <b>Rate ratio 0.46</b><br>(0.37 to 0.58) | Incidence rate (events/patient/year):<br>reslizumab 0.84;<br>placebo 1.81 | ⊕⊕⊕○<br>MODERATE | CRITICAL   |
| <b>Time to first asthma exacerbation (follow up: 52 weeks)</b>                                                                                   |                   |              |               |                      |                             |                      |                |               |                                          |                                                                           |                  |            |
| 2 <sup>2</sup>                                                                                                                                   | randomised trials | not serious  | not serious   | serious <sup>f</sup> | not serious                 | none                 | 477            | 476           | <b>HR 0.54</b><br>(0.44 to 0.66)         | -                                                                         | ⊕⊕⊕○<br>MODERATE | CRITICAL   |
| <b>Rate of exacerbations requiring emergency department visit or hospitalisation (follow up: 52 weeks)</b>                                       |                   |              |               |                      |                             |                      |                |               |                                          |                                                                           |                  |            |
| 2 <sup>2</sup>                                                                                                                                   | randomised trials | not serious  | not serious   | serious <sup>f</sup> | serious <sup>g</sup>        | none                 | 477            | 476           | <b>Rate ratio 0.67</b><br>(0.39 to 1.17) | Incidence rate (events/patient/year):<br>reslizumab 0.08;<br>placebo 0.12 | ⊕⊕○○<br>LOW      | CRITICAL   |
| <b>Exacerbations requiring emergency department visit (patients with ≥1 exacerbation) (follow up: 15 weeks)</b>                                  |                   |              |               |                      |                             |                      |                |               |                                          |                                                                           |                  |            |
| <b><u>Study participants meet criteria for the diagnosis of severe asthma defined by the ERS/ATS Guidelines on Severe Asthma<sup>6</sup></u></b> |                   |              |               |                      |                             |                      |                |               |                                          |                                                                           |                  |            |
| 1 <sup>4</sup>                                                                                                                                   | randomised trials | not serious  | not serious   | not serious          | very serious <sup>g,h</sup> | none                 | 3/53 (5.7%)    | 4/53 (7.5%)   | <b>Peto OR 0.74</b><br>(0.16 to 3.40)    | <b>19 fewer per 1,000</b><br>(from 63 fewer to 142 more)                  | ⊕⊕○○<br>LOW      | CRITICAL   |

| Certainty assessment                                                                                                                |                   |                      |                          |                      |                             |                      | № of patients       |                    | Effect                                 |                                                    | Certainty        | Importance |
|-------------------------------------------------------------------------------------------------------------------------------------|-------------------|----------------------|--------------------------|----------------------|-----------------------------|----------------------|---------------------|--------------------|----------------------------------------|----------------------------------------------------|------------------|------------|
| № of studies                                                                                                                        | Study design      | Risk of bias         | Inconsistency            | Indirectness         | Imprecision                 | Other considerations | Reslizumab          | placebo            | Relative (95% CI)                      | Absolute (95% CI)                                  |                  |            |
| Exacerbations requiring hospitalisation (patients with ≥1 exacerbation) (follow up: 15 weeks)                                       |                   |                      |                          |                      |                             |                      |                     |                    |                                        |                                                    |                  |            |
| Study participants meet criteria for the diagnosis of severe asthma defined by the ERS/ATS Guidelines on Severe Asthma <sup>6</sup> |                   |                      |                          |                      |                             |                      |                     |                    |                                        |                                                    |                  |            |
| 1 <sup>4</sup>                                                                                                                      | randomised trials | not serious          | not serious              | not serious          | very serious <sup>g,h</sup> | none                 | 1/53 (1.9%)         | 0/53 (0.0%)        | OR 3.00<br><br>(0.12 to 72.02)         | NA                                                 | ⊕⊕○○<br>LOW      | CRITICAL   |
| Adverse events (follow up: range 15 weeks to 52 weeks)                                                                              |                   |                      |                          |                      |                             |                      |                     |                    |                                        |                                                    |                  |            |
| 5 <sup>1,2,3,4</sup>                                                                                                                | randomised trials | not serious          | not serious <sup>i</sup> | serious <sup>b</sup> | serious <sup>j,k</sup>      | none                 | 690/1028<br>(67.1%) | 587/730<br>(80.4%) | RR 0.88<br>(0.81 to 0.96) <sup>k</sup> | 96 fewer per 1,000<br>(from 153 fewer to 32 fewer) | ⊕⊕○○<br>LOW      | CRITICAL   |
| Adverse events (follow up: 15 weeks)                                                                                                |                   |                      |                          |                      |                             |                      |                     |                    |                                        |                                                    |                  |            |
| Study participants meet criteria for the diagnosis of severe asthma defined by the ERS/ATS Guidelines on Severe Asthma <sup>6</sup> |                   |                      |                          |                      |                             |                      |                     |                    |                                        |                                                    |                  |            |
| 1 <sup>4</sup>                                                                                                                      | randomised trials | not serious          | not serious              | not serious          | very serious <sup>h,j</sup> | none                 | 38/53 (71.7%)       | 42/53 (79.2%)      | RR 0.90<br>(0.73 to 1.13)              | 79 fewer per 1,000<br>(from 214 fewer to 103 more) | ⊕⊕○○<br>LOW      | CRITICAL   |
| Drug-related adverse events (follow up: 16 weeks)                                                                                   |                   |                      |                          |                      |                             |                      |                     |                    |                                        |                                                    |                  |            |
| 2 <sup>1,3</sup>                                                                                                                    | randomised trials | serious <sup>l</sup> | serious <sup>m</sup>     | serious <sup>a</sup> | not serious <sup>n</sup>    | none                 | 40/498<br>(8.0%)    | 24/202<br>(11.9%)  | RR 0.78<br>(0.22 to 2.72)              | 26 fewer per 1,000<br>(from 93 fewer to 204 more)  | ⊕○○○<br>VERY LOW | CRITICAL   |
| Serious adverse events (follow up: range 15 weeks to 52 weeks)                                                                      |                   |                      |                          |                      |                             |                      |                     |                    |                                        |                                                    |                  |            |

| Certainty assessment                                                                                                                                                                                                                         |                   |              |               |                      |                             |                      | No of patients |               | Effect                  |                                               | Certainty        | Importance |
|----------------------------------------------------------------------------------------------------------------------------------------------------------------------------------------------------------------------------------------------|-------------------|--------------|---------------|----------------------|-----------------------------|----------------------|----------------|---------------|-------------------------|-----------------------------------------------|------------------|------------|
| No of studies                                                                                                                                                                                                                                | Study design      | Risk of bias | Inconsistency | Indirectness         | Imprecision                 | Other considerations | Reslizumab     | placebo       | Relative (95% CI)       | Absolute (95% CI)                             |                  |            |
| 5 <sup>1,2,3,4</sup>                                                                                                                                                                                                                         | randomised trials | not serious  | not serious   | serious <sup>b</sup> | not serious <sup>o</sup>    | none                 | 64/1028 (6.2%) | 63/730 (8.6%) | RR 0.81 (0.57 to 1.14)  | 16 fewer per 1,000 (from 37 fewer to 12 more) | ⊕⊕⊕○<br>MODERATE | CRITICAL   |
| <b>Serious adverse events (follow up: 15 weeks)</b><br><b>Study participants meet criteria for the diagnosis of severe asthma defined by the ERS/ATS Guidelines on Severe Asthma<sup>6</sup></b>                                             |                   |              |               |                      |                             |                      |                |               |                         |                                               |                  |            |
| 1 <sup>4</sup>                                                                                                                                                                                                                               | randomised trials | not serious  | not serious   | not serious          | very serious <sup>g,h</sup> | none                 | 2/53 (3.8%)    | 1/53 (1.9%)   | OR 1.97 (0.20 to 19.40) | 18 more per 1,000 (from 15 fewer to 253 more) | ⊕⊕○○<br>LOW      | CRITICAL   |
| <b>Systemic steroids (absolute final dose), Systemic steroids (percent reduction), Loss of work or school days, Intensive care unit admission, Non-invasive ventilation, Intubation, Comorbidities, Upper airway symptoms - not reported</b> |                   |              |               |                      |                             |                      |                |               |                         |                                               |                  |            |
| -                                                                                                                                                                                                                                            | -                 | -            | -             | -                    | -                           | -                    | -              | -             | -                       | -                                             | -                |            |

CI: Confidence interval; FEV1: forced expiratory volume in 1 second; MCID: minimal clinically important difference; MD: Mean difference; OR: Odds ratio; RR: Risk ratio; HR: Hazard Ratio; NA: Not available

### Explanations

- All studies included a mixed population of patients with moderate and severe asthma.
- All studies except one (Castro 2011) included a mixed population of patients with moderate and severe asthma.
- The ends of the 95% confidence interval include appreciable clinical benefit (MCID = 0.5) and no benefit and could lead to different clinical decisions. Results from single study including only 106 patients.
- The ends of the 95% confidence interval include appreciable clinical benefit (MCID = 10.38%) and no benefit and could lead to different clinical decisions. Single study including only 104 patients.
- The ends of the 95% confidence interval include appreciable clinical benefit (MCID = 0.23 L) and no benefit and could lead to different clinical decisions. Results from single study including only 104 patients.
- The two studies reported by Castro 2015 included a mixed population of patients with moderate and severe asthma.
- The ends of the 95% confidence interval include appreciable benefit and harm and could lead to different clinical decisions.
- Single study including only 106 patients.

i.  $I^2 = 54\%$  ( $P=0.07$ ) may represent moderate heterogeneity. However the point estimates from the 5 studies have the same direction of effect and 4 of 5 studies have overlapping 95% confidence intervals. For these reasons we have not rated down for inconsistency.

j. The ends of the 95% confidence interval include appreciable benefit and no benefit and could lead to different clinical decisions. This judgement was based on a arbitrary clinical decision threshold of 15% increase or decrease in absolute effect.

k. There was a high incidence of adverse events in both reslizumab and placebo groups. The apparent benefit from reslizumab might be explained by a reduction of asthma-related adverse events with the active drug.

l. High risk of selective outcome reporting bias because 5 studies have reported any adverse events but only 2 studies have reported drug-related adverse events.

m. There is considerable statistical heterogeneity ( $I^2 = 83\%$ ,  $P = 0.01$ ), the effect estimates point in different directions (one study suggests benefit and the other suggests harm) and the 95% confidence intervals show minimal overlap.

n. This judgement was based on a arbitrary clinical decision threshold of 15% increase or decrease in absolute effect.

o. This judgement was based on a arbitrary clinical decision threshold of 10% increase or decrease in absolute effect.

## References

1. Bjerner L, Lemiere C, Maspero J, Weiss S, Zangrilli J, Germinaro M. Reslizumab for Inadequately Controlled Asthma With Elevated Blood Eosinophil Levels: A Randomized Phase 3 Study. *Chest* 2016; 150: 789-798.
2. Castro M, Zangrilli J, Wechsler ME, et al. Reslizumab for inadequately controlled asthma with elevated blood eosinophil counts: results from two multicentre, parallel, double-blind, randomised, placebo-controlled, phase 3 trials. *Lancet Respir Med* 2015; 3: 355-366.
3. Corren J, Weinstein S, Janka L, Zangrilli J, Garin M. Phase 3 Study of Reslizumab in Patients With Poorly Controlled Asthma: Effects Across a Broad Range of Eosinophil Counts. *Chest* 2016; 150: 799-810.
4. Castro M, Mathur S, Hargreave F, et al. Reslizumab for poorly controlled, eosinophilic asthma: a randomized, placebo-controlled study. *Am J Respir Crit Care Med* 2011; 184: 1125-1132.
5. Santanello NC, Zhang J, Seidenberg B, Reiss TF, Barber BL. What are minimal important changes for asthma measures in a clinical trial? *Eur Respir J* 1999; 14: 23-27.
6. Chung KF, Wenzel SE, Brozek JL, et al. International ERS/ATS guidelines on definition, evaluation and treatment of severe asthma. *Eur Respir J* 2014; 43: 343-373.
7. Bime C, Wei CY, Holbrook JT, et al. Asthma Symptom Utility Index: Reliability, validity, responsiveness, and the minimal important difference in adult asthmatic patients. *J Allergy Clin Immunol* 2012; 130: 1078-1084.

GRADE Evidence Profile: BENRALIZUMAB

Bibliography: Bleecker 2016, Castro 2014, FitzGerald 2016, Nair 2017, Park 2016

| Certainty assessment                                                                                                                                                                                                    |                   |              |               |                      |                           |                      | No of patients |         | Effect            |                                                       | Certainty        | Importance |
|-------------------------------------------------------------------------------------------------------------------------------------------------------------------------------------------------------------------------|-------------------|--------------|---------------|----------------------|---------------------------|----------------------|----------------|---------|-------------------|-------------------------------------------------------|------------------|------------|
| No of studies                                                                                                                                                                                                           | Study design      | Risk of bias | Inconsistency | Indirectness         | Imprecision               | Other considerations | Benralizumab   | placebo | Relative (95% CI) | Absolute (95% CI)                                     |                  |            |
| Quality of life (change from baseline) (follow up: range 28 weeks to 56 weeks; assessed with: Asthma Quality of Life Questionnaire (AQLQ); Scale from: 1 to 7; higher values indicate better quality of life; MCID 0.5) |                   |              |               |                      |                           |                      |                |         |                   |                                                       |                  |            |
| 4 <sup>1,2,3,4</sup>                                                                                                                                                                                                    | randomised trials | not serious  | not serious   | serious <sup>a</sup> | not serious               | none                 | 592            | 657     | -                 | MD <b>0.32 higher</b><br>(0.19 higher to 0.45 higher) | ⊕⊕⊕○<br>MODERATE | CRITICAL   |
| Quality of life (change from baseline) (follow up: 28 weeks; assessed with: Asthma Quality of Life Questionnaire (AQLQ); Scale from: 1 to 7; higher values indicate better quality of life; MCID 0.5)                   |                   |              |               |                      |                           |                      |                |         |                   |                                                       |                  |            |
| Study participants meet criteria for the diagnosis of severe asthma defined by the ERS/ATS Guidelines on Severe Asthma <sup>7</sup>                                                                                     |                   |              |               |                      |                           |                      |                |         |                   |                                                       |                  |            |
| 1 <sup>1</sup>                                                                                                                                                                                                          | randomised trials | not serious  | not serious   | not serious          | very serious <sup>b</sup> | none                 | 72             | 75      | -                 | MD <b>0.45 higher</b><br>(0.14 higher to 0.76 higher) | ⊕⊕○○<br>LOW      | IMPORTANT  |
| Asthma control (change from baseline) (follow up: range 28 weeks to 56 weeks; assessed with: Asthma Control Questionnaire (ACQ-6); Scale from: 0 to 6; lower values indicate better asthma control; MCID 0.5)           |                   |              |               |                      |                           |                      |                |         |                   |                                                       |                  |            |
| 4 <sup>1,2,3,4</sup>                                                                                                                                                                                                    | randomised trials | not serious  | not serious   | serious <sup>a</sup> | not serious               | none                 | 870            | 946     | -                 | MD <b>0.29 lower</b><br>(0.40 lower to 0.17 lower)    | ⊕⊕⊕○<br>MODERATE | CRITICAL   |
| Asthma control (change from baseline) (follow up: 28 weeks; assessed with: Asthma Control Questionnaire (ACQ-6); Scale from: 0 to 6; lower values indicate better asthma control; MCID 0.5)                             |                   |              |               |                      |                           |                      |                |         |                   |                                                       |                  |            |
| Study participants meet criteria for the diagnosis of severe asthma defined by the ERS/ATS Guidelines on Severe Asthma <sup>7</sup>                                                                                     |                   |              |               |                      |                           |                      |                |         |                   |                                                       |                  |            |
| 1 <sup>1</sup>                                                                                                                                                                                                          | randomised trials | not serious  | not serious   | not serious          | very serious <sup>b</sup> | none                 | 73             | 74      | -                 | MD <b>0.55 lower</b><br>(0.86 lower to 0.24 lower)    | ⊕⊕○○<br>LOW      | CRITICAL   |

| Certainty assessment                                                                                                                                                                |                   |              |               |                      |                           |                      | No of patients |         | Effect            |                                                       | Certainty        | Importance |
|-------------------------------------------------------------------------------------------------------------------------------------------------------------------------------------|-------------------|--------------|---------------|----------------------|---------------------------|----------------------|----------------|---------|-------------------|-------------------------------------------------------|------------------|------------|
| No of studies                                                                                                                                                                       | Study design      | Risk of bias | Inconsistency | Indirectness         | Imprecision               | Other considerations | Benralizumab   | placebo | Relative (95% CI) | Absolute (95% CI)                                     |                  |            |
| Asthma symptoms (change from baseline) (follow up: range 28 weeks to 56 weeks; assessed with: different symptom scores; lower scores indicate less frequent and/or severe symptoms) |                   |              |               |                      |                           |                      |                |         |                   |                                                       |                  |            |
| 4 <sup>1,2,3,4</sup>                                                                                                                                                                | randomised trials | not serious  | not serious   | serious <sup>a</sup> | not serious               | none                 | 858            | 953     | -                 | SMD <b>0.19 lower</b><br>(0.28 lower to 0.09 lower)   | ⊕⊕⊕○<br>MODERATE | CRITICAL   |
| Asthma symptoms (change from baseline) (follow up: 28 weeks; assessed with: Total asthma symptom score; lower scores indicate less frequent and/or severe symptoms)                 |                   |              |               |                      |                           |                      |                |         |                   |                                                       |                  |            |
| Study participants meet criteria for the diagnosis of severe asthma defined by the ERS/ATS Guidelines on Severe Asthma <sup>7</sup>                                                 |                   |              |               |                      |                           |                      |                |         |                   |                                                       |                  |            |
| 1 <sup>1</sup>                                                                                                                                                                      | randomised trials | not serious  | not serious   | not serious          | very serious <sup>c</sup> | none                 | 68             | 67      | -                 | MD <b>0.18 lower</b><br>(0.52 lower to 0.16 higher)   | ⊕⊕○○<br>LOW      | CRITICAL   |
| Lung function (FEV1 % of predicted) (follow up: 52 weeks; MCID 10.38% <sup>6</sup> )                                                                                                |                   |              |               |                      |                           |                      |                |         |                   |                                                       |                  |            |
| 1 <sup>5</sup>                                                                                                                                                                      | randomised trials | not serious  | not serious   | serious <sup>d</sup> | very serious <sup>e</sup> | none                 | 25             | 26      | -                 | MD <b>5.3 lower</b><br>(17.63 lower to 7.03 higher)   | ⊕○○○<br>VERY LOW | IMPORTANT  |
| Lung function (Pre-bronchodilator FEV1 litres, change from baseline) (follow up: range 28 weeks to 56 weeks; MCID 0.23 litre <sup>6</sup> )                                         |                   |              |               |                      |                           |                      |                |         |                   |                                                       |                  |            |
| 4 <sup>1,2,3,4</sup>                                                                                                                                                                | randomised trials | not serious  | not serious   | serious <sup>a</sup> | not serious               | none                 | 879            | 982     | -                 | MD <b>0.11 higher</b><br>(0.06 higher to 0.16 higher) | ⊕⊕⊕○<br>MODERATE | IMPORTANT  |
| Lung function (Pre-bronchodilator FEV1 litres, change from baseline) (follow up: 28 weeks; MCID 0.23 litre <sup>6</sup> )                                                           |                   |              |               |                      |                           |                      |                |         |                   |                                                       |                  |            |
| Study participants meet criteria for the diagnosis of severe asthma defined by the ERS/ATS Guidelines on Severe Asthma <sup>7</sup>                                                 |                   |              |               |                      |                           |                      |                |         |                   |                                                       |                  |            |
| 1 <sup>1</sup>                                                                                                                                                                      | randomised trials | not serious  | not serious   | not serious          | very serious <sup>f</sup> | none                 | 69             | 73      | -                 | MD <b>0.11 higher</b><br>(0.03 lower to 0.26 higher)  | ⊕⊕○○<br>LOW      | IMPORTANT  |

| Certainty assessment                                                                                                                        |                   |              |                      |                      |                             |                      | № of patients      |                    | Effect                            |                                                                             | Certainty        | Importance |
|---------------------------------------------------------------------------------------------------------------------------------------------|-------------------|--------------|----------------------|----------------------|-----------------------------|----------------------|--------------------|--------------------|-----------------------------------|-----------------------------------------------------------------------------|------------------|------------|
| № of studies                                                                                                                                | Study design      | Risk of bias | Inconsistency        | Indirectness         | Imprecision                 | Other considerations | Benralizumab       | placebo            | Relative (95% CI)                 | Absolute (95% CI)                                                           |                  |            |
| Lung function(Post-bronchodilator FEV1 litres, change from baseline) (follow up: range 48 weeks to 56 weeks; MCID 0.23 litre <sup>6</sup> ) |                   |              |                      |                      |                             |                      |                    |                    |                                   |                                                                             |                  |            |
| 2 <sup>2,4</sup>                                                                                                                            | randomised trials | not serious  | not serious          | serious <sup>g</sup> | not serious                 | none                 | 472                | 484                | -                                 | MD 0.1 higher<br>(0.04 higher to 0.16 higher)                               | ⊕⊕⊕○<br>MODERATE | IMPORTANT  |
| Exacerbations (patients with ≥1 exacerbation) (follow up: range 28 weeks to 56 weeks)                                                       |                   |              |                      |                      |                             |                      |                    |                    |                                   |                                                                             |                  |            |
| 2 <sup>1,2</sup>                                                                                                                            | randomised trials | not serious  | serious <sup>h</sup> | serious <sup>i</sup> | serious <sup>j</sup>        | none                 | 112/312<br>(35.9%) | 165/323<br>(51.1%) | RR 0.62<br>(0.36 to 1.06)         | 194 fewer per 1,000<br>(from 327 fewer to 31 more)                          | ⊕○○○<br>VERY LOW | CRITICAL   |
| Exacerbations (patients with ≥1 exacerbation) (follow up: 28 weeks)                                                                         |                   |              |                      |                      |                             |                      |                    |                    |                                   |                                                                             |                  |            |
| Study participants meet criteria for the diagnosis of severe asthma defined by the ERS/ATS Guidelines on Severe Asthma <sup>7</sup>         |                   |              |                      |                      |                             |                      |                    |                    |                                   |                                                                             |                  |            |
| 1 <sup>1</sup>                                                                                                                              | randomised trials | not serious  | not serious          | not serious          | serious <sup>k</sup>        | none                 | 17/73 (23.3%)      | 39/75 (52.0%)      | RR 0.45<br>(0.28 to 0.72)         | 286 fewer per 1,000<br>(from 374 fewer to 146 fewer)                        | ⊕⊕⊕○<br>MODERATE | CRITICAL   |
| Rate of any exacerbation (Age range 12-75 years; follow up: range 28 weeks to 56 weeks)                                                     |                   |              |                      |                      |                             |                      |                    |                    |                                   |                                                                             |                  |            |
| 4 <sup>1,2,3,4</sup>                                                                                                                        | randomised trials | not serious  | not serious          | serious <sup>a</sup> | not serious                 | none                 | 905                | 935                | Rate ratio 0.58<br>(0.47 to 0.73) | Incidence rate (events/patient/year):<br>benralizumab 0.64;<br>placebo 1.19 | ⊕⊕⊕○<br>MODERATE | CRITICAL   |
| Rate of any exacerbation (Age range 12-17 years; follow up: range 48 weeks to 56 weeks)                                                     |                   |              |                      |                      |                             |                      |                    |                    |                                   |                                                                             |                  |            |
| 2 <sup>2,4</sup>                                                                                                                            | randomised trials | not serious  | not serious          | serious <sup>g</sup> | very serious <sup>i,l</sup> | none                 | 16                 | 19                 | Rate ratio 1.70<br>(0.50 to 5.81) | NA                                                                          | ⊕○○○<br>VERY LOW | CRITICAL   |

| Certainty assessment                                                                                                                |                   |              |                      |                      |                      |                      | № of patients |         | Effect                               |                                                                             | Certainty        | Importance |
|-------------------------------------------------------------------------------------------------------------------------------------|-------------------|--------------|----------------------|----------------------|----------------------|----------------------|---------------|---------|--------------------------------------|-----------------------------------------------------------------------------|------------------|------------|
| № of studies                                                                                                                        | Study design      | Risk of bias | Inconsistency        | Indirectness         | Imprecision          | Other considerations | Benralizumab  | placebo | Relative (95% CI)                    | Absolute (95% CI)                                                           |                  |            |
| Rate of any exacerbation (follow up: 28 weeks)                                                                                      |                   |              |                      |                      |                      |                      |               |         |                                      |                                                                             |                  |            |
| Study participants meet criteria for the diagnosis of severe asthma defined by the ERS/ATS Guidelines on Severe Asthma <sup>7</sup> |                   |              |                      |                      |                      |                      |               |         |                                      |                                                                             |                  |            |
| 1 <sup>1</sup>                                                                                                                      | randomised trials | not serious  | not serious          | not serious          | serious <sup>k</sup> | none                 | 73            | 75      | Rate ratio<br>0.30<br>(0.17 to 0.53) | Incidence rate (events/patient/year):<br>benralizumab 0.54;<br>placebo 1.83 | ⊕⊕⊕○<br>MODERATE | CRITICAL   |
| Time to first asthma exacerbation (follow up: range 28 weeks to 56 weeks)                                                           |                   |              |                      |                      |                      |                      |               |         |                                      |                                                                             |                  |            |
| 3 <sup>1,2,4</sup>                                                                                                                  | randomised trials | not serious  | not serious          | serious <sup>g</sup> | not serious          | none                 | 579           | 590     | HR 0.57<br>(0.40 to 0.81)            | -                                                                           | ⊕⊕⊕○<br>MODERATE | CRITICAL   |
| Time to first asthma exacerbation (follow up: 28 weeks)                                                                             |                   |              |                      |                      |                      |                      |               |         |                                      |                                                                             |                  |            |
| Study participants meet criteria for the diagnosis of severe asthma defined by the ERS/ATS Guidelines on Severe Asthma <sup>7</sup> |                   |              |                      |                      |                      |                      |               |         |                                      |                                                                             |                  |            |
| 1 <sup>1</sup>                                                                                                                      | randomised trials | not serious  | not serious          | not serious          | serious <sup>k</sup> | none                 | 73            | 75      | HR 0.32<br>(0.18 to 0.57)            | -                                                                           | ⊕⊕⊕○<br>MODERATE | CRITICAL   |
| Rate of exacerbations requiring emergency department visit or hospitalisation (follow up: range 28 weeks to 56 weeks)               |                   |              |                      |                      |                      |                      |               |         |                                      |                                                                             |                  |            |
| 3 <sup>1,2,4</sup>                                                                                                                  | randomised trials | not serious  | serious <sup>m</sup> | serious <sup>g</sup> | serious <sup>j</sup> | none                 | 579           | 590     | Rate ratio<br>0.45<br>(0.14 to 1.47) | Incidence rate (events/patient/year):<br>benralizumab 0.04;<br>placebo 0.18 | ⊕○○○<br>VERY LOW | CRITICAL   |
| Rate of exacerbations requiring emergency department visit or hospitalisation (follow up: 28 weeks)                                 |                   |              |                      |                      |                      |                      |               |         |                                      |                                                                             |                  |            |
| Study participants meet criteria for the diagnosis of severe asthma defined by the ERS/ATS Guidelines on Severe Asthma <sup>7</sup> |                   |              |                      |                      |                      |                      |               |         |                                      |                                                                             |                  |            |



| Certainty assessment                                                                                                                             |                   |                      |               |                      |                             |                      | No of patients   |                  | Effect                                        |                                                                       | Certainty        | Importance |
|--------------------------------------------------------------------------------------------------------------------------------------------------|-------------------|----------------------|---------------|----------------------|-----------------------------|----------------------|------------------|------------------|-----------------------------------------------|-----------------------------------------------------------------------|------------------|------------|
| No of studies                                                                                                                                    | Study design      | Risk of bias         | Inconsistency | Indirectness         | Imprecision                 | Other considerations | Benralizumab     | placebo          | Relative (95% CI)                             | Absolute (95% CI)                                                     |                  |            |
| 1 <sup>1</sup>                                                                                                                                   | randomised trials | not serious          | not serious   | not serious          | serious <sup>k</sup>        | none                 | 73               | 75               | <b>Rate ratio 0.07</b><br>(0.01 to 0.63)      | Incidence rate (events/patient/year): benralizumab 0.02; placebo 0.32 | ⊕⊕⊕○<br>MODERATE | CRITICAL   |
| <b>Exacerbations requiring emergency department visit or hospitalisation (patients with ≥1 exacerbation) (follow up: 56 weeks)</b>               |                   |                      |               |                      |                             |                      |                  |                  |                                               |                                                                       |                  |            |
| 1 <sup>2</sup>                                                                                                                                   | randomised trials | not serious          | not serious   | serious <sup>n</sup> | serious <sup>j</sup>        | none                 | 20/239 (8.4%)    | 20/248 (8.1%)    | <b>RR 1.04</b><br>(0.57 to 1.88)              | <b>3 more per 1,000</b><br>(from 35 fewer to 71 more)                 | ⊕⊕○○<br>LOW      | CRITICAL   |
| <b>Adverse events (follow up: range 28 weeks to 68 weeks)</b>                                                                                    |                   |                      |               |                      |                             |                      |                  |                  |                                               |                                                                       |                  |            |
| 5<br>1,2,3,4,5                                                                                                                                   | randomised trials | not serious          | not serious   | serious <sup>o</sup> | not serious <sup>p</sup>    | none                 | 737/1001 (73.6%) | 883/1169 (75.5%) | <b>RR 0.96</b><br>(0.91 to 1.01) <sup>q</sup> | <b>30 fewer per 1,000</b><br>(from 68 fewer to 8 more)                | ⊕⊕⊕○<br>MODERATE | CRITICAL   |
| <b>Adverse events (follow up: 28 weeks)</b>                                                                                                      |                   |                      |               |                      |                             |                      |                  |                  |                                               |                                                                       |                  |            |
| <b><u>Study participants meet criteria for the diagnosis of severe asthma defined by the ERS/ATS Guidelines on Severe Asthma<sup>7</sup></u></b> |                   |                      |               |                      |                             |                      |                  |                  |                                               |                                                                       |                  |            |
| 1 <sup>1</sup>                                                                                                                                   | randomised trials | not serious          | not serious   | not serious          | very serious <sup>k,r</sup> | none                 | 55/73 (75.3%)    | 62/75 (82.7%)    | <b>RR 0.91</b><br>(0.77 to 1.08) <sup>q</sup> | <b>74 fewer per 1,000</b><br>(from 190 fewer to 66 more )             | ⊕⊕○○<br>LOW      | CRITICAL   |
| <b>Drug-related adverse events (follow up: 48 weeks)</b>                                                                                         |                   |                      |               |                      |                             |                      |                  |                  |                                               |                                                                       |                  |            |
| 1 <sup>4</sup>                                                                                                                                   | randomised trials | serious <sup>s</sup> | not serious   | serious <sup>d</sup> | not serious <sup>p</sup>    | none                 | 47/354 (13.3%)   | 34/370 (9.2%)    | <b>RR 1.44</b><br>(0.95 to 2.19)              | <b>40 more per 1,000</b><br>(from 5 fewer to 109 more)                | ⊕⊕○○<br>LOW      | CRITICAL   |
| <b>Serious adverse events (follow up: range 28 weeks to 68 weeks)</b>                                                                            |                   |                      |               |                      |                             |                      |                  |                  |                                               |                                                                       |                  |            |

| Certainty assessment                                                                                                                                  |                   |              |               |                      |                             |                      | № of patients                                                                                                                                                                                                                                                                                                                                                    |                     | Effect                    |                                                   | Certainty        | Importance |
|-------------------------------------------------------------------------------------------------------------------------------------------------------|-------------------|--------------|---------------|----------------------|-----------------------------|----------------------|------------------------------------------------------------------------------------------------------------------------------------------------------------------------------------------------------------------------------------------------------------------------------------------------------------------------------------------------------------------|---------------------|---------------------------|---------------------------------------------------|------------------|------------|
| № of studies                                                                                                                                          | Study design      | Risk of bias | Inconsistency | Indirectness         | Imprecision                 | Other considerations | Benralizumab                                                                                                                                                                                                                                                                                                                                                     | placebo             | Relative (95% CI)         | Absolute (95% CI)                                 |                  |            |
| 5<br>1,2,3,4,5                                                                                                                                        | randomised trials | not serious  | not serious   | serious <sup>o</sup> | not serious <sup>t</sup>    | none                 | 109/1001<br>(10.9%)                                                                                                                                                                                                                                                                                                                                              | 157/1169<br>(13.4%) | RR 0.79<br>(0.63 to 1.00) | 28 fewer per 1,000<br>(from 50 fewer to 0 fewer)  | ⊕⊕⊕○<br>MODERATE | CRITICAL   |
| Serious adverse events (follow up: 28 weeks)                                                                                                          |                   |              |               |                      |                             |                      |                                                                                                                                                                                                                                                                                                                                                                  |                     |                           |                                                   |                  |            |
| Study participants meet criteria for the diagnosis of severe asthma defined by the ERS/ATS Guidelines on Severe Asthma <sup>7</sup>                   |                   |              |               |                      |                             |                      |                                                                                                                                                                                                                                                                                                                                                                  |                     |                           |                                                   |                  |            |
| 1 <sup>1</sup>                                                                                                                                        | randomised trials | not serious  | not serious   | not serious          | very serious <sup>k,u</sup> | none                 | 7/73 (9.6%)                                                                                                                                                                                                                                                                                                                                                      | 14/75 (18.7%)       | RR 0.51<br>(0.22 to 1.20) | 91 fewer per 1,000<br>(from 146 fewer to 37 more) | ⊕⊕○○<br>LOW      | CRITICAL   |
| Systemic steroids (absolute final dose) (follow up: 28 weeks)                                                                                         |                   |              |               |                      |                             |                      |                                                                                                                                                                                                                                                                                                                                                                  |                     |                           |                                                   |                  |            |
| Study participants meet criteria for the diagnosis of severe asthma defined by the ERS/ATS Guidelines on Severe Asthma <sup>7</sup>                   |                   |              |               |                      |                             |                      |                                                                                                                                                                                                                                                                                                                                                                  |                     |                           |                                                   |                  |            |
| 1 <sup>1</sup>                                                                                                                                        | randomised trials | not serious  | not serious   | not serious          | serious <sup>k</sup>        | none                 | The median oral prednisone or prednisolone dose (range) at the final visit (week 28) was 10.0 mg/day (0.0 to 40.0) in patients who received placebo (n=75) and 5.0 mg/day (0.0 to 30.0) in patients who received benralizumab (n=73) . No statistical test comparing results from the two groups has been reported.                                              |                     |                           | ⊕⊕⊕○<br>MODERATE                                  | CRITICAL         |            |
| Systemic steroids (percent reduction) (follow up: 28 weeks)                                                                                           |                   |              |               |                      |                             |                      |                                                                                                                                                                                                                                                                                                                                                                  |                     |                           |                                                   |                  |            |
| Study participants meet criteria for the diagnosis of severe asthma defined by the ERS/ATS Guidelines on Severe Asthma <sup>7</sup>                   |                   |              |               |                      |                             |                      |                                                                                                                                                                                                                                                                                                                                                                  |                     |                           |                                                   |                  |            |
| 1 <sup>1</sup>                                                                                                                                        | randomised trials | not serious  | not serious   | not serious          | serious <sup>k</sup>        | none                 | The median prednisone or prednisolone dose reduction from baseline (range) at the final visit (week 28) was 25.0% (–150% to 100%) in the placebo group (n=75) and 75.0% (–50% to 100%) in the benralizumab group (n=73) ( Wilcoxon rank-sum test P<0.001). Negative values indicate an increase in the final oral prednisone or prednisolone dose from baseline. |                     |                           | ⊕⊕⊕○<br>MODERATE                                  | CRITICAL         |            |
| Loss of work or school days, Intensive care unit admission, Non-invasive ventilation, Intubation, Comorbidities, Upper airway symptoms - not reported |                   |              |               |                      |                             |                      |                                                                                                                                                                                                                                                                                                                                                                  |                     |                           |                                                   |                  |            |

| Certainty assessment |              |              |               |              |             |                      | No of patients |         | Effect            |                   | Certainty | Importance |
|----------------------|--------------|--------------|---------------|--------------|-------------|----------------------|----------------|---------|-------------------|-------------------|-----------|------------|
| No of studies        | Study design | Risk of bias | Inconsistency | Indirectness | Imprecision | Other considerations | Benralizumab   | placebo | Relative (95% CI) | Absolute (95% CI) |           |            |
| -                    | -            | -            | -             | -            | -           | -                    | -              | -       | -                 | -                 | -         |            |

**CI:** Confidence interval; **FEV1:** forced expiratory volume in 1 second; **MCID:** minimal clinically important difference; **MD:** Mean difference; **SMD:** Standardised mean difference; **RR:** Risk ratio; **HR:** Hazard Ratio; **NA:** Not available

### Explanations

- a. Three studies (Bleecker 2016, Castro 2014 and FitzGerald 2016) included a mixed population of patients with moderate and severe asthma.
- b. The ends of the 95% confidence interval include appreciable clinical benefit (MCID = 0.5) and no benefit and could lead to different clinical decisions. Results from single study with only 147 patients.
- c. The end of the 95% confidence interval could lead to different clinical decisions. Results from single study including only 135 patients.
- d. The study included a mixed population of patients with moderate and severe asthma.
- e. The ends of the 95% confidence interval include appreciable clinical harm (MCID = 10.38%) and no benefit and could lead to different clinical decisions. Results from single study with only 51 patients.
- f. The ends of the 95% confidence interval include appreciable clinical benefit (MCID = 0.23 ml) and no benefit and could lead to different clinical decisions. Results from single study with only 142 patients.
- g. Two studies (Bleecker 2016 and FitzGerald 2016) included a mixed population of patients with moderate and severe asthma.
- h. There is considerable statistical heterogeneity ( $I^2 = 79\%$ ,  $P = 0.03$ ) and the 95% confidence intervals show little overlap.
- i. One study (Bleecker 2016) included a mixed population of patients with moderate and severe asthma.
- j. The ends of the 95% confidence interval include appreciable clinical benefit and harm and could lead to opposite clinical decisions.
- k. Single study including only 148 patients.
- l. Two studies including only 35 patients aged 12-17 years.
- m. There is considerable statistical heterogeneity ( $I^2 = 82\%$ ,  $P = 0.004$ ) and the point estimates from individual studies vary widely.
- n. The study included a mixed population of patients with moderate and severe asthma
- o. Four studies (Bleecker 2016, Castro 2014, FitzGerald 2016 and Park 2016) included a mixed population of patients with moderate and severe asthma.
- p. This judgement was based on an arbitrary clinical decision threshold of 15% increase or decrease in absolute effect.
- q. There was a high incidence of adverse events in both benralizumab and placebo groups. The apparent benefit from benralizumab might be explained by a reduction of asthma-related adverse events with the active drug.

- r. The ends of the 95% confidence interval include appreciable clinical benefit and no benefit, assuming an arbitrary clinical decision threshold of 15% increase or decrease in absolute effect. This could lead to different clinical decisions.
- s. High risk of selective outcome reporting bias because 5 studies have reported any adverse events but only 1 study has reported drug-related adverse events.
- t. This judgement was based on an arbitrary clinical decision threshold of 10% increase or decrease in absolute effect.
- u. The ends of the 95% confidence interval include appreciable clinical benefit and no benefit, assuming an arbitrary clinical decision threshold of 10% increase or decrease in absolute effect. This could lead to different clinical decisions.

## References

1. Nair P, Wenzel SE, Rabe KF, et al. Oral Glucocorticoid-Sparing Effect of Benralizumab in Severe Asthma. *N Engl J Med* 2017; 376: 2448-2458.
2. FitzGerald JM, Bleecker ER, Nair P, et al. Benralizumab, an anti-interleukin-5 receptor alpha monoclonal antibody, as add-on treatment for patients with severe, uncontrolled, eosinophilic asthma (CALIMA): a randomised, double-blind, placebo-controlled phase 3 trial. *Lancet* 2016; 388: 2128–2141.
3. Castro M, Wenzel SE, Bleecker ER, et al. Benralizumab, an anti-interleukin 5 receptor [alpha] monoclonal antibody, versus placebo for uncontrolled eosinophilic asthma: a phase 2b randomised dose-ranging study. *Lancet Respir Med* 2014; 2: 878–890.
4. Bleecker ER, FitzGerald JM, Chanez P, et al. Efficacy and safety of benralizumab for patients with severe asthma uncontrolled with high-dosage inhaled corticosteroids and long-acting  $\beta$ 2-agonists (SIROCCO): a randomised, multicentre, placebo-controlled phase 3 trial. *Lancet* 2016.; 388: 2115–2127.
5. Park HS, Kim MK, Imai N, et al. A Phase 2a Study of Benralizumab for Patients with Eosinophilic Asthma in South Korea and Japan. *Int Arch Allergy Immunol* 2016; 169:135-145.
6. Santanello NC, Zhang J, Seidenberg B, Reiss TF, Barber BL. What are minimal important changes for asthma measures in a clinical trial? *Eur Respir J* 1999; 14: 23-27.
7. Chung KF, Wenzel SE, Brozek JL, et al. International ERS/ATS guidelines on definition, evaluation and treatment of severe asthma. *Eur Respir J* 2014; 43: 343-73.

Should an anti-interleukin 5 strategy versus no anti-interleukin 5 strategy be used for adults and children with severe asthma?

|                       |                                                                                                                                                                                                                                                                                                                 |                    |                                                                                                                                                                                                                                                                                                                                                                                                                                                                                                                                                                                                                                                                                                                                                                                                                                                                                                                                                                                                                                                                   |
|-----------------------|-----------------------------------------------------------------------------------------------------------------------------------------------------------------------------------------------------------------------------------------------------------------------------------------------------------------|--------------------|-------------------------------------------------------------------------------------------------------------------------------------------------------------------------------------------------------------------------------------------------------------------------------------------------------------------------------------------------------------------------------------------------------------------------------------------------------------------------------------------------------------------------------------------------------------------------------------------------------------------------------------------------------------------------------------------------------------------------------------------------------------------------------------------------------------------------------------------------------------------------------------------------------------------------------------------------------------------------------------------------------------------------------------------------------------------|
| <b>POPULATION:</b>    | Adults and children with severe asthma                                                                                                                                                                                                                                                                          | <b>BACKGROUND:</b> | <p>By definition, patients with severe asthma have disease that is either unresponsive to traditional therapies with inhaled corticosteroids and bronchodilators or require these therapies to maintain adequate control. To address this unmet need for improved therapies, several biologic therapies have been designed to target the inflammatory signature typical of most patients with asthma. Interleukin 5 (IL5) is the principal cytokine driving eosinophilic inflammation in most of these patients. Monoclonal antibodies that target the IL5 cytokine or its receptor have been found to be efficacious in randomized controlled trials in improving asthma-related outcomes. These three drugs in this category are mepolizumab, reslizumab, and benralizumab, and will henceforth be referred to as the anti-IL5 strategy. This systematic review and meta-analysis synthesizes the data from randomized controlled trials and meta-analyses investigating the anti-IL5 strategy and provides treatment recommendations based on the results.</p> |
| <b>INTERVENTION:</b>  | Anti-interleukin 5 strategy (monoclonal antibodies directed against the interleukin 5 or its receptor)                                                                                                                                                                                                          |                    |                                                                                                                                                                                                                                                                                                                                                                                                                                                                                                                                                                                                                                                                                                                                                                                                                                                                                                                                                                                                                                                                   |
| <b>COMPARISON:</b>    | No anti-interleukin 5 strategy                                                                                                                                                                                                                                                                                  |                    |                                                                                                                                                                                                                                                                                                                                                                                                                                                                                                                                                                                                                                                                                                                                                                                                                                                                                                                                                                                                                                                                   |
| <b>MAIN OUTCOMES:</b> | <p>Rate of exacerbations</p> <p>Time to first asthma exacerbation</p> <p>Asthma exacerbations requiring ER visits or hospitalization</p> <p>Lung function</p> <p>Asthma control</p> <p>Maintenance corticosteroid dose reduction</p> <p>Adverse events</p> <p>Serious adverse events</p> <p>Quality of life</p> |                    |                                                                                                                                                                                                                                                                                                                                                                                                                                                                                                                                                                                                                                                                                                                                                                                                                                                                                                                                                                                                                                                                   |

## Assessment

|                   | JUDGEMENT                                                                                                                                                                                                                      | RESEARCH EVIDENCE                                                                                                                                                                                                                                                                                                                                                                                                                                                                                                                                                                                                                                                                                                                                                                                                                                                                                                                                                                                                                                                                                                                                                                                                                                                                                                                                                                                                                                                                                                                                                                                                                                                                                                                                                                                                                                                                                                                                                                                                                                                                              | ADDITIONAL CONSIDERATIONS                                                                                                                                                                                                                                                                                                                                                                                                                                                                                                                                                                                                                                                                                                                                                                                                                                                                                                                                                                                                                                                                                                                                                                                                                                                                                                                                                                                                                                                                                                                                                                                                                                                                                                                                             |
|-------------------|--------------------------------------------------------------------------------------------------------------------------------------------------------------------------------------------------------------------------------|------------------------------------------------------------------------------------------------------------------------------------------------------------------------------------------------------------------------------------------------------------------------------------------------------------------------------------------------------------------------------------------------------------------------------------------------------------------------------------------------------------------------------------------------------------------------------------------------------------------------------------------------------------------------------------------------------------------------------------------------------------------------------------------------------------------------------------------------------------------------------------------------------------------------------------------------------------------------------------------------------------------------------------------------------------------------------------------------------------------------------------------------------------------------------------------------------------------------------------------------------------------------------------------------------------------------------------------------------------------------------------------------------------------------------------------------------------------------------------------------------------------------------------------------------------------------------------------------------------------------------------------------------------------------------------------------------------------------------------------------------------------------------------------------------------------------------------------------------------------------------------------------------------------------------------------------------------------------------------------------------------------------------------------------------------------------------------------------|-----------------------------------------------------------------------------------------------------------------------------------------------------------------------------------------------------------------------------------------------------------------------------------------------------------------------------------------------------------------------------------------------------------------------------------------------------------------------------------------------------------------------------------------------------------------------------------------------------------------------------------------------------------------------------------------------------------------------------------------------------------------------------------------------------------------------------------------------------------------------------------------------------------------------------------------------------------------------------------------------------------------------------------------------------------------------------------------------------------------------------------------------------------------------------------------------------------------------------------------------------------------------------------------------------------------------------------------------------------------------------------------------------------------------------------------------------------------------------------------------------------------------------------------------------------------------------------------------------------------------------------------------------------------------------------------------------------------------------------------------------------------------|
| DESIRABLE EFFECTS | <p><b>How substantial are the desirable anticipated effects?</b></p> <ul style="list-style-type: none"> <li>○ Trivial</li> <li>○ Small</li> <li>○ Moderate</li> <li>● Large</li> <li>○ Varies</li> <li>○ Don't know</li> </ul> | <p>Asthma exacerbations are a critically important outcome for the patients with asthma who experience these and the clinicians who care for them.</p> <p>Relative to participants assigned to placebo, those assigned to mepolizumab experienced a 50% reduction (95% CI 39-65%) (see evidence profiles) in their rates of asthma exacerbations; participants assigned to reslizumab and benralizumab demonstrated similar reductions in rates of asthma exacerbations [54% (95% CI 42-63%) and 42% (95% CI 27-53%), respectively]. Although a defined threshold for clinically meaningful reductions in asthma exacerbations has not been universally agreed upon, the effect sizes in reductions in asthma exacerbations for these three drugs are considered clinically substantial by most practitioners.</p> <p>Among adolescent participants (ages 12-17 years, n=35 between two trials), those assigned to benralizumab experienced a 1.7x increase (95% CI 0.50x-5.81x) in their rates of asthma exacerbations (very low quality evidence).</p> <p>Another critically important outcome in asthma includes asthma symptom scores. Although the evidence favors all anti-IL5 strategy drugs relative to placebo on these outcomes, their relative change was not as large compared to the improvement observed with asthma exacerbations.</p> <p>Relative to participants assigned to placebo, those assigned to mepolizumab experienced a 0.43-point decrease (i.e. improvement) in Asthma Control Questionnaire (ACQ) (95% CI 0.31-0.56-point decrease); participants assigned to reslizumab and benralizumab demonstrated similar improvements in ACQ scores [0.26 (95% CI 0.18-0.33-point decrease) and 0.29 (95% CI 0.17-0.40 point decreases), respectively]. Although these were statistically significant decreases in ACQ scores, on average these drugs did not surpass the 0.5-point decrease threshold traditionally assigned as the MCID in ACQ symptom score for trials in asthma.</p> <p>Meta-analytical results on other outcomes appear in the online supplement.</p> | <ul style="list-style-type: none"> <li>● The decision to consider changes in lung function [forced expiratory volume in the first second (FEV1)] as 'important' outcomes as opposed to 'critical' outcomes is due to their place relative to other critical outcomes. We understand that most clinicians would prescribe anti-IL5 strategy drugs due to their efficacy in reducing asthma exacerbations despite only modest improvements in lung function.</li> <li>● Data from children or adolescents are unavailable for mepolizumab and reslizumab. There are data available on the effects of benralizumab on adolescents with severe asthma, but this subset of the cohort is small. The resulting confidence intervals around effect estimates are large, which makes the quality of the data for adolescents very low. As noted in the FDA approval statement, the decision to allow the use of benralizumab in adolescents was based on the impracticality of conducting a sufficiently powered study among severe asthmatic adolescents due to the low prevalence of this population; the similarities in pharmacokinetic and pharmacodynamic values for this drug, and the absence of major safety concerns for the population. More data are needed in order to have greater quality recommendations for adolescents.</li> <li>● The meta-analysis for mepolizumab included only the trials that tested the FDA- and EMA-approved dose of 100mg administered subcutaneously.</li> <li>● Taken together, however, the reduction in asthma exacerbations is substantial enough for this committee to judge the desirable effects of an anti-IL5 strategy as large, regardless of relatively smaller effects on lung function and symptom scores.</li> </ul> |

|                       |                                                                                                                                                                                                                                  |                                                                                                                                                                                                                                                                                                                                                                                                                                                                                                                                                                                                                                                                                                                                                                                                                                                                                                                                                                                                                                                                                                                                                                                                                                                                                                                                                                                                                                                                                                             |                                                                                                                                                                                                                                                                                                                                                                                                                                                                                                                                                                                                                                                                                         |
|-----------------------|----------------------------------------------------------------------------------------------------------------------------------------------------------------------------------------------------------------------------------|-------------------------------------------------------------------------------------------------------------------------------------------------------------------------------------------------------------------------------------------------------------------------------------------------------------------------------------------------------------------------------------------------------------------------------------------------------------------------------------------------------------------------------------------------------------------------------------------------------------------------------------------------------------------------------------------------------------------------------------------------------------------------------------------------------------------------------------------------------------------------------------------------------------------------------------------------------------------------------------------------------------------------------------------------------------------------------------------------------------------------------------------------------------------------------------------------------------------------------------------------------------------------------------------------------------------------------------------------------------------------------------------------------------------------------------------------------------------------------------------------------------|-----------------------------------------------------------------------------------------------------------------------------------------------------------------------------------------------------------------------------------------------------------------------------------------------------------------------------------------------------------------------------------------------------------------------------------------------------------------------------------------------------------------------------------------------------------------------------------------------------------------------------------------------------------------------------------------|
|                       |                                                                                                                                                                                                                                  |                                                                                                                                                                                                                                                                                                                                                                                                                                                                                                                                                                                                                                                                                                                                                                                                                                                                                                                                                                                                                                                                                                                                                                                                                                                                                                                                                                                                                                                                                                             |                                                                                                                                                                                                                                                                                                                                                                                                                                                                                                                                                                                                                                                                                         |
| UNDESIRABLE EFFECTS   | <p><b>How substantial are the undesirable anticipated effects?</b></p> <ul style="list-style-type: none"> <li>○ Large</li> <li>○ Moderate</li> <li>● Small</li> <li>○ Trivial</li> <li>○ Varies</li> <li>○ Don't know</li> </ul> | <p>In the RCTs analysed, the risk of a study participant developing either an adverse event or a serious adverse event was lower for those participants assigned to any of the 3 anti-IL5 strategy drugs compared to those assigned to placebo. Relative to placebo, the risk of developing an adverse event for a participant assigned to mepolizumab was 7% lower (95% CI 1-12% lower) and for those assigned to reslizumab it was 12% lower (95% CI 4-18% lower). This difference was not statistically significant for those assigned to benralizumab, but the direction of the effect was also toward a lower risk of adverse events (3% lower). Similarly, participants experienced a lower risk of serious adverse events (not statistically significant) when assigned to anti-IL5 strategy drugs.</p> <p>The lower risk of <i>total</i> adverse events is likely driven by the reduction in asthma exacerbations shown by these drugs.</p> <p>Data are available on <i>drug-related</i> adverse events from all 3 mepolizumab trials, but only from 2 of 5 reslizumab trials and 1 of 5 benralizumab trials. These data show that, relative to placebo, participants assigned to mepolizumab had a 35% greater relative risk of drug-related adverse events (95% CI 1-81% greater RR); those assigned to reslizumab had a 22% lower relative risk and those assigned to benralizumab had a 44% greater relative risk, however the effect for last two drugs was not statistically significant.</p> | <p>Research evidence reveals that the rates of adverse events with anti-IL5 therapies are not substantially different from placebo. Infrequent but severe adverse reactions, including hypersensitive reactions, can not be excluded since randomised clinical trials are not powered enough to detect them. Safety data from phase 3 extension studies have been recently published and are reassuring. Post-authorisation pharmacovigilance systems, including larger cohorts of patients receiving these treatments, are expected to provide additional real-life safety data.</p>                                                                                                   |
| CERTAINTY OF EVIDENCE | <p><b>What is the overall certainty of the evidence of effects?</b></p> <ul style="list-style-type: none"> <li>● Very low</li> <li>● Low</li> <li>● Moderate</li> <li>○ High</li> <li>○ No included studies</li> </ul>           | <p>Mepolizumab (population meets the definition of severe asthma defined by the ERS/ATS Guidelines): moderate quality of evidence.</p> <p>Benralizumab:</p> <p>--overall population (patients with moderate and severe persistent asthma): very low quality of evidence;</p> <p>--population that meets criteria for the diagnosis of severe asthma defined by the ERS/ATS Guidelines: low quality of evidence</p> <p>Reslizumab:</p> <p>--overall population (patients with moderate and severe persistent asthma): low quality of evidence;</p> <p>--population that meets criteria for the diagnosis of severe asthma defined by the ERS/ATS Guidelines: low quality of evidence</p>                                                                                                                                                                                                                                                                                                                                                                                                                                                                                                                                                                                                                                                                                                                                                                                                                     | <p>Our certainty assessment relies on study design (randomized controlled trials), risk of bias, inconsistency, indirectness, and imprecision.</p> <p>Further the certainty is based on the quality of evidence that is lowest among critical outcomes.</p> <p>The RCTs on all anti-IL5 strategy drugs were mainly designed to investigate changes in asthma exacerbations. Consequently, the certainty of the data for this critical outcome is high (mepolizumab and reslizumab) or moderate (benralizumab). However, the certainty of other outcomes such as respiratory symptoms was lower for all three drugs, and therefore downgraded the overall certainty of the evidence.</p> |

|        |                                                                                                                                                                                                                                                                                                                                                                                                                         |                                |                                                                                                                                                                                                                                                                                                                                                                                                                                                                                                                                                                                                                                                                                                                                                                                                                                                                                                                                                                                                                                                                                                                                                                                                                                                                                                                                                                                                                         |
|--------|-------------------------------------------------------------------------------------------------------------------------------------------------------------------------------------------------------------------------------------------------------------------------------------------------------------------------------------------------------------------------------------------------------------------------|--------------------------------|-------------------------------------------------------------------------------------------------------------------------------------------------------------------------------------------------------------------------------------------------------------------------------------------------------------------------------------------------------------------------------------------------------------------------------------------------------------------------------------------------------------------------------------------------------------------------------------------------------------------------------------------------------------------------------------------------------------------------------------------------------------------------------------------------------------------------------------------------------------------------------------------------------------------------------------------------------------------------------------------------------------------------------------------------------------------------------------------------------------------------------------------------------------------------------------------------------------------------------------------------------------------------------------------------------------------------------------------------------------------------------------------------------------------------|
|        |                                                                                                                                                                                                                                                                                                                                                                                                                         |                                |                                                                                                                                                                                                                                                                                                                                                                                                                                                                                                                                                                                                                                                                                                                                                                                                                                                                                                                                                                                                                                                                                                                                                                                                                                                                                                                                                                                                                         |
| VALUES | <p><b>Is there important uncertainty about or variability in how much people value the main outcomes?</b></p> <ul style="list-style-type: none"> <li>○ Important uncertainty or variability</li> <li>○ Possibly important uncertainty or variability</li> <li>○ Probably no important uncertainty or variability</li> <li>● No important uncertainty or variability</li> <li>○ No known undesirable outcomes</li> </ul> | <p>No evidence identified.</p> | <p>There is no important uncertainty about how patients and the clinicians who care for them assess asthma exacerbations. On the other hand, asthma exacerbations is not the only critical outcome for patients and clinicians, who also consider the effect of interventions on other outcomes, such as changes in lung function, change in maintenance dose of systemic corticosteroids, asthma symptoms, and quality of life. Although the effect size of anti-IL5 strategy drugs is not uniform across these outcomes, these drugs tended to improve to varying degrees all asthma related outcomes. For instance, although the reduction in asthma exacerbation rates is greater in magnitude than the change in lung function for all 3 of these drugs, all 3 did improve lung function. Further, patients and clinicians rarely decide to prescribe these drugs based on only one of these outcomes in isolation.</p> <p>All three anti-IL5 strategy drugs are currently FDA and EMA approved in patients with severe eosinophilic asthma. Patients with asthma of greater severity are more likely to experience a greater rate of asthma exacerbations. Therefore, the decision to whether or not to prescribe these drugs is currently restricted to patients for whom the main outcome researched in the anti-IL5 strategy trials—asthma exacerbations—is likely to be important. Further, many pharmacy</p> |



|                                             |                                                                                                                                                                                                                                                                                                                                                                                                                                   |                                                                                                                                                                                                                                                                                                                                                    |                                                                                                                                                                                                                                                                                                                      |
|---------------------------------------------|-----------------------------------------------------------------------------------------------------------------------------------------------------------------------------------------------------------------------------------------------------------------------------------------------------------------------------------------------------------------------------------------------------------------------------------|----------------------------------------------------------------------------------------------------------------------------------------------------------------------------------------------------------------------------------------------------------------------------------------------------------------------------------------------------|----------------------------------------------------------------------------------------------------------------------------------------------------------------------------------------------------------------------------------------------------------------------------------------------------------------------|
|                                             |                                                                                                                                                                                                                                                                                                                                                                                                                                   |                                                                                                                                                                                                                                                                                                                                                    | formularies for physician groups and hospitals restrict these drugs to patients with severe asthma and a recent history of asthma exacerbations.                                                                                                                                                                     |
| BALANCE OF EFFECTS                          | <p><b>Does the balance between desirable and undesirable effects favor the intervention or the comparison?</b></p> <ul style="list-style-type: none"> <li>○ Favors the comparison</li> <li>○ Probably favors the comparison</li> <li>○ Does not favor either the intervention or the comparison</li> <li>○ Probably favors the intervention</li> <li>● Favors the intervention</li> <li>○ Varies</li> <li>○ Don't know</li> </ul> | All three anti-IL5 strategy drugs have been associated with large desirable effects and small undesirable effects.                                                                                                                                                                                                                                 | As noted above, both serious and non-serious side effects were noted in clinical trials to have occurred more commonly in the placebo groups to which these drugs were compared. Thus, considering the substantial benefit in terms of reducing asthma exacerbations, the balance favors using an anti-IL5 strategy. |
| COST EFFECTIVENESS                          | <p><b>Does the cost-effectiveness of the intervention favor the intervention or the comparison?</b></p> <ul style="list-style-type: none"> <li>● Favors the comparison</li> <li>○ Probably favors the comparison</li> <li>○ Does not favor either the intervention or the comparison</li> <li>○ Probably favors the intervention</li> <li>○ Favors the intervention</li> <li>○ Varies</li> <li>○ No included studies</li> </ul>   | The December 2018 report by the Institute for Clinical and Economic Review (ICER) states that anti-IL5 strategy drugs cost >\$340,000 per quality-adjusted life years (QALY) gained when compared to standard of care (ICER 2018). These figures far exceed the accepted threshold for a cost-effective intervention of \$150,000 per QALY gained. | Therefore, the alternative is favored over an anti-IL5 strategy from a cost-effectiveness standpoint.                                                                                                                                                                                                                |
| CERTAINTY OF EVIDENCE OF REQUIRED RESOURCES | <p><b>What is the certainty of the evidence of resource requirements (costs)?</b></p> <ul style="list-style-type: none"> <li>○ Very low</li> <li>○ Low</li> <li>○ Moderate</li> <li>● High</li> <li>○ No included studies</li> </ul>                                                                                                                                                                                              | The manufacturers' listed annual net prices are \$29,500, \$28,900, and \$27,800 for mepolizumab, reslizumab, and benralizumab, respectively, after applying discounts and rebates (ICER 2018).                                                                                                                                                    |                                                                                                                                                                                                                                                                                                                      |
| EQUITY                                      | <p><b>What would be the impact on health equity?</b></p> <ul style="list-style-type: none"> <li>○ Reduced</li> <li>● Probably reduced</li> </ul>                                                                                                                                                                                                                                                                                  | No evidence identified.                                                                                                                                                                                                                                                                                                                            | In the US, racial and ethnic minorities, and individuals of lower socioeconomic status have been documented to have                                                                                                                                                                                                  |

|               |                                                                                                                                                                                                                                |                         |                                                                                                                                                                                                                                                                                                                                                                                                                                                                                                                                                                                                                                                                                                                                                                                                                                                                                                                  |
|---------------|--------------------------------------------------------------------------------------------------------------------------------------------------------------------------------------------------------------------------------|-------------------------|------------------------------------------------------------------------------------------------------------------------------------------------------------------------------------------------------------------------------------------------------------------------------------------------------------------------------------------------------------------------------------------------------------------------------------------------------------------------------------------------------------------------------------------------------------------------------------------------------------------------------------------------------------------------------------------------------------------------------------------------------------------------------------------------------------------------------------------------------------------------------------------------------------------|
|               | <ul style="list-style-type: none"> <li>○ Probably no impact</li> <li>○ Probably increased</li> <li>○ Increased</li> <li>○ Varies</li> <li>○ Don't know</li> </ul>                                                              |                         | <p>less access to specialty clinics and are less likely to use controller therapy for asthma. Since anti-IL5 strategy drugs are mainly prescribed by specialists it is likely that racial and ethnic minorities will be less likely to be prescribed one of these drugs. Other groups may thus experience greater reductions in asthma exacerbations due to access to these drugs, which will thus reduce health equity. Similarly, patients with severe asthma who live in regions with fewer specialists will be less likely to receive these drugs, thus reducing equity between areas with high and low access to specialty care.</p> <p>On the other hand, the manufacturers of these drugs have programs in place to reduce patients' out of pocket costs for these drugs, which may partly mitigate the decrease in equity posed by differences in access by socioeconomic status and race/ethnicity.</p> |
| ACCEPTABILITY | <p><b>Is the intervention acceptable to key stakeholders?</b></p> <ul style="list-style-type: none"> <li>○ No</li> <li>○ Probably no</li> <li>○ Probably yes</li> <li>○ Yes</li> <li>● Varies</li> <li>○ Don't know</li> </ul> | No evidence identified. | <p>Most patients with severe asthma welcome the possibility of relief from asthma through anti-IL5 strategy drugs.</p> <p>Health insurance companies and clinic administrations find anti-IL5 strategy drugs less acceptable due to their high cost.</p>                                                                                                                                                                                                                                                                                                                                                                                                                                                                                                                                                                                                                                                         |
| FEASIBILITY   | <p><b>Is the intervention feasible to implement?</b></p> <ul style="list-style-type: none"> <li>○ No</li> <li>○ Probably no</li> <li>○ Probably yes</li> <li>○ Yes</li> <li>● Varies</li> <li>○ Don't know</li> </ul>          | No evidence identified. | <p>The feasibility to implement is limited by the prescription of these drugs only by asthma specialists with the clinical resources to administer these drugs and monitor patients. Clinicians also need to have access to a laboratory that can document peripheral blood eosinophils in these patients. Patients without access to such clinicians would find it very difficult to receive these drugs.</p>                                                                                                                                                                                                                                                                                                                                                                                                                                                                                                   |



**Should a measurement of a specific biomarker be used to guide initiation of treatment with a monoclonal anti-IL5 or IL5R $\alpha$  antibody in adults and children with severe asthma? (biomarkers being exhaled NO, peripheral or sputum eosinophils, and serum periostin)**

**GRADE Evidence Profile: MEPOLIZUMAB (according to baseline number of blood eosinophils)**

| Outcome<br>№ of participants<br>(studies)                                                                                                                                                                                                                                                                                                                          | Relative effect<br>(95% CI)                                                                                                                                                                                                                                                                                                                                                                                                                                                                                                                                                               | Anticipated absolute effects (95% CI) |            | Certainty               | What happens                                                                                                                                                                                                                                                                                                                     |
|--------------------------------------------------------------------------------------------------------------------------------------------------------------------------------------------------------------------------------------------------------------------------------------------------------------------------------------------------------------------|-------------------------------------------------------------------------------------------------------------------------------------------------------------------------------------------------------------------------------------------------------------------------------------------------------------------------------------------------------------------------------------------------------------------------------------------------------------------------------------------------------------------------------------------------------------------------------------------|---------------------------------------|------------|-------------------------|----------------------------------------------------------------------------------------------------------------------------------------------------------------------------------------------------------------------------------------------------------------------------------------------------------------------------------|
|                                                                                                                                                                                                                                                                                                                                                                    |                                                                                                                                                                                                                                                                                                                                                                                                                                                                                                                                                                                           |                                       | Difference |                         |                                                                                                                                                                                                                                                                                                                                  |
| <b>Asthma control (ACQ-5 responders defined as patients achieving a ≥0.5-point reduction from baseline in ACQ-5 score)</b><br>assessed with: Asthma Control Questionnaire (ACQ-5); Scale from: 0 to 6; lower values indicate better asthma control; MCID 0.5.<br>Follow up: 24 weeks<br>№ of participants: 457<br>(1 RCT) <sup>1</sup><br><br>Importance: CRITICAL | Percentage of patients treated with mepolizumab who achieved a ≥0.5-point reduction from baseline in ACQ-5 score compared to placebo were: Eosinophil ≥ 150/uL: 63% versus 41%, RR (95%CI) = 1.53 (1.27 to 1.84), Absolute effect = 217 more per 1,000 (from 110 more to 343 more), n=457. Eosinophil ≥ 300/uL: 63% versus 37%, RR (95%CI) = 1.68 (1.33 to 2.12), Absolute effect = 254 more per 1,000 (from 123 more to 418 more), n=322. Eosinophil ≥ 500/uL: 62% versus 37%, RR (95%CI) = 1.67 (1.23 to 2.28), Absolute effect = 249 more per 1,000 (from 86 more to 477 more), n=187. |                                       |            | ⊕⊕⊕○<br>MODERATE<br>b,c | There are significant increases in the number of patients treated with mepolizumab compared to placebo who achieve a reduction of at least 0.5 point in the ACQ-5 score. Increases are seen in patients with baseline blood eosinophil counts ≥150/uL, ≥300/uL and ≥500/uL. However there is appreciable overlap of the 95% CIs. |

| Study or Subgroup                                                                | Mepolizumab Events | Mepolizumab Total | Placebo Events | Placebo Total | Weight        | Risk Ratio M-H, Fixed, 95% CI | Risk Ratio M-H, Fixed, 95% CI |
|----------------------------------------------------------------------------------|--------------------|-------------------|----------------|---------------|---------------|-------------------------------|-------------------------------|
| <b>5.1.1 Baseline blood eosinophils ≥150 cells/μl</b>                            |                    |                   |                |               |               |                               |                               |
| Chupp 2017                                                                       | 139                | 222               | 96             | 235           | 100.0%        | 1.53 [1.27, 1.84]             |                               |
| <b>Subtotal (95% CI)</b>                                                         |                    | <b>222</b>        |                | <b>235</b>    | <b>100.0%</b> | <b>1.53 [1.27, 1.84]</b>      |                               |
| Total events                                                                     | 139                |                   | 96             |               |               |                               |                               |
| Heterogeneity: Not applicable<br>Test for overall effect: Z = 4.54 (P < 0.00001) |                    |                   |                |               |               |                               |                               |
| <b>5.1.2 Baseline blood eosinophils ≥300 cells/μl</b>                            |                    |                   |                |               |               |                               |                               |
| Chupp 2017                                                                       | 98                 | 156               | 62             | 166           | 100.0%        | 1.68 [1.33, 2.12]             |                               |
| <b>Subtotal (95% CI)</b>                                                         |                    | <b>156</b>        |                | <b>166</b>    | <b>100.0%</b> | <b>1.68 [1.33, 2.12]</b>      |                               |
| Total events                                                                     | 98                 |                   | 62             |               |               |                               |                               |
| Heterogeneity: Not applicable<br>Test for overall effect: Z = 4.41 (P < 0.0001)  |                    |                   |                |               |               |                               |                               |
| <b>5.1.3 Baseline blood eosinophils ≥500 cells/μl</b>                            |                    |                   |                |               |               |                               |                               |
| Chupp 2017                                                                       | 58                 | 93                | 35             | 94            | 100.0%        | 1.67 [1.23, 2.28]             |                               |
| <b>Subtotal (95% CI)</b>                                                         |                    | <b>93</b>         |                | <b>94</b>     | <b>100.0%</b> | <b>1.67 [1.23, 2.28]</b>      |                               |
| Total events                                                                     | 58                 |                   | 35             |               |               |                               |                               |
| Heterogeneity: Not applicable<br>Test for overall effect: Z = 3.30 (P = 0.0010)  |                    |                   |                |               |               |                               |                               |

0.50.711.52

Favours placebo Favours mepolizumab

⊕⊕⊕○  
MODERATE  
b,c

There are significant increases in the number of patients treated with mepolizumab compared to placebo who achieve a reduction of at least 0.5 point in the ACQ-5 score. Increases are seen in patients with baseline blood eosinophil counts  $\geq 150/\mu\text{L}$ ,  $\geq 300/\mu\text{L}$  and  $\geq 500/\mu\text{L}$ . However there is appreciable overlap of the 95% CIs.

| Outcome<br>№ of participants<br>(studies)                                                                                                                                                                                                                                             | Relative effect<br>(95% CI)                                                                                                                                                                                                                                                                                                                                | Anticipated absolute effects (95% CI)                                                                                                                                                                                                                                                                                                                                                                                                                                                                                                                                                                                                                                                                                                                                                                                                                                                                                                                                                                                                                                                                                                                                                                                                                                                                                                                                                                                                                                                                                                                                                                                                                              |               | Difference                        | Certainty                         | What happens |        |                                   |                                   |                                                       |  |  |  |  |  |             |       |        |        |                      |  |                          |  |  |               |                             |  |                                                                                  |  |  |  |  |  |                                                       |  |  |  |  |  |             |       |        |        |                      |  |                          |  |  |               |                             |  |                                                                                  |  |  |  |  |  |                                                       |  |  |  |  |  |             |       |        |        |                      |  |                          |  |  |               |                             |  |                                                                                  |  |  |  |  |  |                             |                                                                                                                                                                                                                                                                                                                                                                                                                            |
|---------------------------------------------------------------------------------------------------------------------------------------------------------------------------------------------------------------------------------------------------------------------------------------|------------------------------------------------------------------------------------------------------------------------------------------------------------------------------------------------------------------------------------------------------------------------------------------------------------------------------------------------------------|--------------------------------------------------------------------------------------------------------------------------------------------------------------------------------------------------------------------------------------------------------------------------------------------------------------------------------------------------------------------------------------------------------------------------------------------------------------------------------------------------------------------------------------------------------------------------------------------------------------------------------------------------------------------------------------------------------------------------------------------------------------------------------------------------------------------------------------------------------------------------------------------------------------------------------------------------------------------------------------------------------------------------------------------------------------------------------------------------------------------------------------------------------------------------------------------------------------------------------------------------------------------------------------------------------------------------------------------------------------------------------------------------------------------------------------------------------------------------------------------------------------------------------------------------------------------------------------------------------------------------------------------------------------------|---------------|-----------------------------------|-----------------------------------|--------------|--------|-----------------------------------|-----------------------------------|-------------------------------------------------------|--|--|--|--|--|-------------|-------|--------|--------|----------------------|--|--------------------------|--|--|---------------|-----------------------------|--|----------------------------------------------------------------------------------|--|--|--|--|--|-------------------------------------------------------|--|--|--|--|--|-------------|-------|--------|--------|----------------------|--|--------------------------|--|--|---------------|-----------------------------|--|----------------------------------------------------------------------------------|--|--|--|--|--|-------------------------------------------------------|--|--|--|--|--|-------------|-------|--------|--------|----------------------|--|--------------------------|--|--|---------------|-----------------------------|--|----------------------------------------------------------------------------------|--|--|--|--|--|-----------------------------|----------------------------------------------------------------------------------------------------------------------------------------------------------------------------------------------------------------------------------------------------------------------------------------------------------------------------------------------------------------------------------------------------------------------------|
|                                                                                                                                                                                                                                                                                       |                                                                                                                                                                                                                                                                                                                                                            |                                                                                                                                                                                                                                                                                                                                                                                                                                                                                                                                                                                                                                                                                                                                                                                                                                                                                                                                                                                                                                                                                                                                                                                                                                                                                                                                                                                                                                                                                                                                                                                                                                                                    |               |                                   |                                   |              |        |                                   |                                   |                                                       |  |  |  |  |  |             |       |        |        |                      |  |                          |  |  |               |                             |  |                                                                                  |  |  |  |  |  |                                                       |  |  |  |  |  |             |       |        |        |                      |  |                          |  |  |               |                             |  |                                                                                  |  |  |  |  |  |                                                       |  |  |  |  |  |             |       |        |        |                      |  |                          |  |  |               |                             |  |                                                                                  |  |  |  |  |  |                             |                                                                                                                                                                                                                                                                                                                                                                                                                            |
| <b>Asthma control (change from baseline )</b><br>assessed with: Asthma Control Questionnaire (ACQ-5); Scale from: 0 to 6; lower values indicate better asthma control; MCID 0.5.<br>Follow up: 32 weeks<br>№ of participants: 402<br>(1 RCT) <sup>2</sup><br><br>Importance: CRITICAL | Mean change from baseline to week 32 in patients treated with mepolizumab compared to placebo were:<br>Eosinophil ≥150/uL: Mean difference (95%CI) = -0.52 (-0.70 to -0.34), n=402. Eosinophil ≥300/uL: Mean difference (95%CI) = -0.73 (-0.96 to -0.50), n=274. Eosinophil ≥500/uL: Mean difference (95%CI) = -0.76 (-1.06 to -0.46), n=171. <sup>d</sup> | 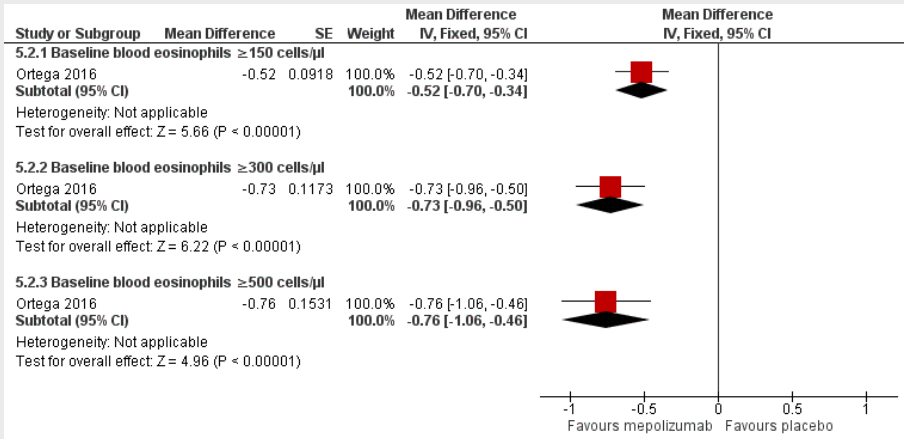 <table><thead><tr><th>Study or Subgroup</th><th>Mean Difference</th><th>SE</th><th>Weight</th><th>Mean Difference IV, Fixed, 95% CI</th><th>Mean Difference IV, Fixed, 95% CI</th></tr></thead><tbody><tr><td colspan="6"><b>5.2.1 Baseline blood eosinophils ≥150 cells/μl</b></td></tr><tr><td>Ortega 2016</td><td>-0.52</td><td>0.0918</td><td>100.0%</td><td>-0.52 [-0.70, -0.34]</td><td></td></tr><tr><td><b>Subtotal (95% CI)</b></td><td></td><td></td><td><b>100.0%</b></td><td><b>-0.52 [-0.70, -0.34]</b></td><td></td></tr><tr><td colspan="6">Heterogeneity: Not applicable<br/>Test for overall effect: Z = 5.66 (P &lt; 0.00001)</td></tr><tr><td colspan="6"><b>5.2.2 Baseline blood eosinophils ≥300 cells/μl</b></td></tr><tr><td>Ortega 2016</td><td>-0.73</td><td>0.1173</td><td>100.0%</td><td>-0.73 [-0.96, -0.50]</td><td></td></tr><tr><td><b>Subtotal (95% CI)</b></td><td></td><td></td><td><b>100.0%</b></td><td><b>-0.73 [-0.96, -0.50]</b></td><td></td></tr><tr><td colspan="6">Heterogeneity: Not applicable<br/>Test for overall effect: Z = 6.22 (P &lt; 0.00001)</td></tr><tr><td colspan="6"><b>5.2.3 Baseline blood eosinophils ≥500 cells/μl</b></td></tr><tr><td>Ortega 2016</td><td>-0.76</td><td>0.1531</td><td>100.0%</td><td>-0.76 [-1.06, -0.46]</td><td></td></tr><tr><td><b>Subtotal (95% CI)</b></td><td></td><td></td><td><b>100.0%</b></td><td><b>-0.76 [-1.06, -0.46]</b></td><td></td></tr><tr><td colspan="6">Heterogeneity: Not applicable<br/>Test for overall effect: Z = 4.96 (P &lt; 0.00001)</td></tr></tbody></table> |               | Study or Subgroup                 | Mean Difference                   | SE           | Weight | Mean Difference IV, Fixed, 95% CI | Mean Difference IV, Fixed, 95% CI | <b>5.2.1 Baseline blood eosinophils ≥150 cells/μl</b> |  |  |  |  |  | Ortega 2016 | -0.52 | 0.0918 | 100.0% | -0.52 [-0.70, -0.34] |  | <b>Subtotal (95% CI)</b> |  |  | <b>100.0%</b> | <b>-0.52 [-0.70, -0.34]</b> |  | Heterogeneity: Not applicable<br>Test for overall effect: Z = 5.66 (P < 0.00001) |  |  |  |  |  | <b>5.2.2 Baseline blood eosinophils ≥300 cells/μl</b> |  |  |  |  |  | Ortega 2016 | -0.73 | 0.1173 | 100.0% | -0.73 [-0.96, -0.50] |  | <b>Subtotal (95% CI)</b> |  |  | <b>100.0%</b> | <b>-0.73 [-0.96, -0.50]</b> |  | Heterogeneity: Not applicable<br>Test for overall effect: Z = 6.22 (P < 0.00001) |  |  |  |  |  | <b>5.2.3 Baseline blood eosinophils ≥500 cells/μl</b> |  |  |  |  |  | Ortega 2016 | -0.76 | 0.1531 | 100.0% | -0.76 [-1.06, -0.46] |  | <b>Subtotal (95% CI)</b> |  |  | <b>100.0%</b> | <b>-0.76 [-1.06, -0.46]</b> |  | Heterogeneity: Not applicable<br>Test for overall effect: Z = 4.96 (P < 0.00001) |  |  |  |  |  | ⊕○○○<br>VERY LOW<br>b,c,e,f | There are significant improvements in asthma control assessed by the ACQ-5 in patients treated with mepolizumab compared to placebo at 32 weeks of follow up. Improvements are seen in patients with baseline blood eosinophil counts ≥150/uL, ≥300/uL and ≥500/uL. However the 95% CI of the subgroups ≥150 cells/uL and ≥500 cells/uL include a response below the MCID and there is appreciable overlap of the 95% CIs. |
| Study or Subgroup                                                                                                                                                                                                                                                                     | Mean Difference                                                                                                                                                                                                                                                                                                                                            | SE                                                                                                                                                                                                                                                                                                                                                                                                                                                                                                                                                                                                                                                                                                                                                                                                                                                                                                                                                                                                                                                                                                                                                                                                                                                                                                                                                                                                                                                                                                                                                                                                                                                                 | Weight        | Mean Difference IV, Fixed, 95% CI | Mean Difference IV, Fixed, 95% CI |              |        |                                   |                                   |                                                       |  |  |  |  |  |             |       |        |        |                      |  |                          |  |  |               |                             |  |                                                                                  |  |  |  |  |  |                                                       |  |  |  |  |  |             |       |        |        |                      |  |                          |  |  |               |                             |  |                                                                                  |  |  |  |  |  |                                                       |  |  |  |  |  |             |       |        |        |                      |  |                          |  |  |               |                             |  |                                                                                  |  |  |  |  |  |                             |                                                                                                                                                                                                                                                                                                                                                                                                                            |
| <b>5.2.1 Baseline blood eosinophils ≥150 cells/μl</b>                                                                                                                                                                                                                                 |                                                                                                                                                                                                                                                                                                                                                            |                                                                                                                                                                                                                                                                                                                                                                                                                                                                                                                                                                                                                                                                                                                                                                                                                                                                                                                                                                                                                                                                                                                                                                                                                                                                                                                                                                                                                                                                                                                                                                                                                                                                    |               |                                   |                                   |              |        |                                   |                                   |                                                       |  |  |  |  |  |             |       |        |        |                      |  |                          |  |  |               |                             |  |                                                                                  |  |  |  |  |  |                                                       |  |  |  |  |  |             |       |        |        |                      |  |                          |  |  |               |                             |  |                                                                                  |  |  |  |  |  |                                                       |  |  |  |  |  |             |       |        |        |                      |  |                          |  |  |               |                             |  |                                                                                  |  |  |  |  |  |                             |                                                                                                                                                                                                                                                                                                                                                                                                                            |
| Ortega 2016                                                                                                                                                                                                                                                                           | -0.52                                                                                                                                                                                                                                                                                                                                                      | 0.0918                                                                                                                                                                                                                                                                                                                                                                                                                                                                                                                                                                                                                                                                                                                                                                                                                                                                                                                                                                                                                                                                                                                                                                                                                                                                                                                                                                                                                                                                                                                                                                                                                                                             | 100.0%        | -0.52 [-0.70, -0.34]              |                                   |              |        |                                   |                                   |                                                       |  |  |  |  |  |             |       |        |        |                      |  |                          |  |  |               |                             |  |                                                                                  |  |  |  |  |  |                                                       |  |  |  |  |  |             |       |        |        |                      |  |                          |  |  |               |                             |  |                                                                                  |  |  |  |  |  |                                                       |  |  |  |  |  |             |       |        |        |                      |  |                          |  |  |               |                             |  |                                                                                  |  |  |  |  |  |                             |                                                                                                                                                                                                                                                                                                                                                                                                                            |
| <b>Subtotal (95% CI)</b>                                                                                                                                                                                                                                                              |                                                                                                                                                                                                                                                                                                                                                            |                                                                                                                                                                                                                                                                                                                                                                                                                                                                                                                                                                                                                                                                                                                                                                                                                                                                                                                                                                                                                                                                                                                                                                                                                                                                                                                                                                                                                                                                                                                                                                                                                                                                    | <b>100.0%</b> | <b>-0.52 [-0.70, -0.34]</b>       |                                   |              |        |                                   |                                   |                                                       |  |  |  |  |  |             |       |        |        |                      |  |                          |  |  |               |                             |  |                                                                                  |  |  |  |  |  |                                                       |  |  |  |  |  |             |       |        |        |                      |  |                          |  |  |               |                             |  |                                                                                  |  |  |  |  |  |                                                       |  |  |  |  |  |             |       |        |        |                      |  |                          |  |  |               |                             |  |                                                                                  |  |  |  |  |  |                             |                                                                                                                                                                                                                                                                                                                                                                                                                            |
| Heterogeneity: Not applicable<br>Test for overall effect: Z = 5.66 (P < 0.00001)                                                                                                                                                                                                      |                                                                                                                                                                                                                                                                                                                                                            |                                                                                                                                                                                                                                                                                                                                                                                                                                                                                                                                                                                                                                                                                                                                                                                                                                                                                                                                                                                                                                                                                                                                                                                                                                                                                                                                                                                                                                                                                                                                                                                                                                                                    |               |                                   |                                   |              |        |                                   |                                   |                                                       |  |  |  |  |  |             |       |        |        |                      |  |                          |  |  |               |                             |  |                                                                                  |  |  |  |  |  |                                                       |  |  |  |  |  |             |       |        |        |                      |  |                          |  |  |               |                             |  |                                                                                  |  |  |  |  |  |                                                       |  |  |  |  |  |             |       |        |        |                      |  |                          |  |  |               |                             |  |                                                                                  |  |  |  |  |  |                             |                                                                                                                                                                                                                                                                                                                                                                                                                            |
| <b>5.2.2 Baseline blood eosinophils ≥300 cells/μl</b>                                                                                                                                                                                                                                 |                                                                                                                                                                                                                                                                                                                                                            |                                                                                                                                                                                                                                                                                                                                                                                                                                                                                                                                                                                                                                                                                                                                                                                                                                                                                                                                                                                                                                                                                                                                                                                                                                                                                                                                                                                                                                                                                                                                                                                                                                                                    |               |                                   |                                   |              |        |                                   |                                   |                                                       |  |  |  |  |  |             |       |        |        |                      |  |                          |  |  |               |                             |  |                                                                                  |  |  |  |  |  |                                                       |  |  |  |  |  |             |       |        |        |                      |  |                          |  |  |               |                             |  |                                                                                  |  |  |  |  |  |                                                       |  |  |  |  |  |             |       |        |        |                      |  |                          |  |  |               |                             |  |                                                                                  |  |  |  |  |  |                             |                                                                                                                                                                                                                                                                                                                                                                                                                            |
| Ortega 2016                                                                                                                                                                                                                                                                           | -0.73                                                                                                                                                                                                                                                                                                                                                      | 0.1173                                                                                                                                                                                                                                                                                                                                                                                                                                                                                                                                                                                                                                                                                                                                                                                                                                                                                                                                                                                                                                                                                                                                                                                                                                                                                                                                                                                                                                                                                                                                                                                                                                                             | 100.0%        | -0.73 [-0.96, -0.50]              |                                   |              |        |                                   |                                   |                                                       |  |  |  |  |  |             |       |        |        |                      |  |                          |  |  |               |                             |  |                                                                                  |  |  |  |  |  |                                                       |  |  |  |  |  |             |       |        |        |                      |  |                          |  |  |               |                             |  |                                                                                  |  |  |  |  |  |                                                       |  |  |  |  |  |             |       |        |        |                      |  |                          |  |  |               |                             |  |                                                                                  |  |  |  |  |  |                             |                                                                                                                                                                                                                                                                                                                                                                                                                            |
| <b>Subtotal (95% CI)</b>                                                                                                                                                                                                                                                              |                                                                                                                                                                                                                                                                                                                                                            |                                                                                                                                                                                                                                                                                                                                                                                                                                                                                                                                                                                                                                                                                                                                                                                                                                                                                                                                                                                                                                                                                                                                                                                                                                                                                                                                                                                                                                                                                                                                                                                                                                                                    | <b>100.0%</b> | <b>-0.73 [-0.96, -0.50]</b>       |                                   |              |        |                                   |                                   |                                                       |  |  |  |  |  |             |       |        |        |                      |  |                          |  |  |               |                             |  |                                                                                  |  |  |  |  |  |                                                       |  |  |  |  |  |             |       |        |        |                      |  |                          |  |  |               |                             |  |                                                                                  |  |  |  |  |  |                                                       |  |  |  |  |  |             |       |        |        |                      |  |                          |  |  |               |                             |  |                                                                                  |  |  |  |  |  |                             |                                                                                                                                                                                                                                                                                                                                                                                                                            |
| Heterogeneity: Not applicable<br>Test for overall effect: Z = 6.22 (P < 0.00001)                                                                                                                                                                                                      |                                                                                                                                                                                                                                                                                                                                                            |                                                                                                                                                                                                                                                                                                                                                                                                                                                                                                                                                                                                                                                                                                                                                                                                                                                                                                                                                                                                                                                                                                                                                                                                                                                                                                                                                                                                                                                                                                                                                                                                                                                                    |               |                                   |                                   |              |        |                                   |                                   |                                                       |  |  |  |  |  |             |       |        |        |                      |  |                          |  |  |               |                             |  |                                                                                  |  |  |  |  |  |                                                       |  |  |  |  |  |             |       |        |        |                      |  |                          |  |  |               |                             |  |                                                                                  |  |  |  |  |  |                                                       |  |  |  |  |  |             |       |        |        |                      |  |                          |  |  |               |                             |  |                                                                                  |  |  |  |  |  |                             |                                                                                                                                                                                                                                                                                                                                                                                                                            |
| <b>5.2.3 Baseline blood eosinophils ≥500 cells/μl</b>                                                                                                                                                                                                                                 |                                                                                                                                                                                                                                                                                                                                                            |                                                                                                                                                                                                                                                                                                                                                                                                                                                                                                                                                                                                                                                                                                                                                                                                                                                                                                                                                                                                                                                                                                                                                                                                                                                                                                                                                                                                                                                                                                                                                                                                                                                                    |               |                                   |                                   |              |        |                                   |                                   |                                                       |  |  |  |  |  |             |       |        |        |                      |  |                          |  |  |               |                             |  |                                                                                  |  |  |  |  |  |                                                       |  |  |  |  |  |             |       |        |        |                      |  |                          |  |  |               |                             |  |                                                                                  |  |  |  |  |  |                                                       |  |  |  |  |  |             |       |        |        |                      |  |                          |  |  |               |                             |  |                                                                                  |  |  |  |  |  |                             |                                                                                                                                                                                                                                                                                                                                                                                                                            |
| Ortega 2016                                                                                                                                                                                                                                                                           | -0.76                                                                                                                                                                                                                                                                                                                                                      | 0.1531                                                                                                                                                                                                                                                                                                                                                                                                                                                                                                                                                                                                                                                                                                                                                                                                                                                                                                                                                                                                                                                                                                                                                                                                                                                                                                                                                                                                                                                                                                                                                                                                                                                             | 100.0%        | -0.76 [-1.06, -0.46]              |                                   |              |        |                                   |                                   |                                                       |  |  |  |  |  |             |       |        |        |                      |  |                          |  |  |               |                             |  |                                                                                  |  |  |  |  |  |                                                       |  |  |  |  |  |             |       |        |        |                      |  |                          |  |  |               |                             |  |                                                                                  |  |  |  |  |  |                                                       |  |  |  |  |  |             |       |        |        |                      |  |                          |  |  |               |                             |  |                                                                                  |  |  |  |  |  |                             |                                                                                                                                                                                                                                                                                                                                                                                                                            |
| <b>Subtotal (95% CI)</b>                                                                                                                                                                                                                                                              |                                                                                                                                                                                                                                                                                                                                                            |                                                                                                                                                                                                                                                                                                                                                                                                                                                                                                                                                                                                                                                                                                                                                                                                                                                                                                                                                                                                                                                                                                                                                                                                                                                                                                                                                                                                                                                                                                                                                                                                                                                                    | <b>100.0%</b> | <b>-0.76 [-1.06, -0.46]</b>       |                                   |              |        |                                   |                                   |                                                       |  |  |  |  |  |             |       |        |        |                      |  |                          |  |  |               |                             |  |                                                                                  |  |  |  |  |  |                                                       |  |  |  |  |  |             |       |        |        |                      |  |                          |  |  |               |                             |  |                                                                                  |  |  |  |  |  |                                                       |  |  |  |  |  |             |       |        |        |                      |  |                          |  |  |               |                             |  |                                                                                  |  |  |  |  |  |                             |                                                                                                                                                                                                                                                                                                                                                                                                                            |
| Heterogeneity: Not applicable<br>Test for overall effect: Z = 4.96 (P < 0.00001)                                                                                                                                                                                                      |                                                                                                                                                                                                                                                                                                                                                            |                                                                                                                                                                                                                                                                                                                                                                                                                                                                                                                                                                                                                                                                                                                                                                                                                                                                                                                                                                                                                                                                                                                                                                                                                                                                                                                                                                                                                                                                                                                                                                                                                                                                    |               |                                   |                                   |              |        |                                   |                                   |                                                       |  |  |  |  |  |             |       |        |        |                      |  |                          |  |  |               |                             |  |                                                                                  |  |  |  |  |  |                                                       |  |  |  |  |  |             |       |        |        |                      |  |                          |  |  |               |                             |  |                                                                                  |  |  |  |  |  |                                                       |  |  |  |  |  |             |       |        |        |                      |  |                          |  |  |               |                             |  |                                                                                  |  |  |  |  |  |                             |                                                                                                                                                                                                                                                                                                                                                                                                                            |

| Outcome<br>№ of participants<br>(studies)                                                                                                                                                                                                                                                                                                                                            | Relative effect<br>(95% CI)                                                                                                                                                                                                                                                                                                                                                                                                                                                                                                                                                                 | Anticipated absolute effects (95% CI)                                                                                                                                                                                                                                                                                                                                                                                                                                                                                                                                                                                                                                                                                                                                                                                                                                                                                                                                                                                                                                                                                                                                                                                                                                                                                                                                                                                                                                                                                                                                                                                                                                                                                                                                                                                                                                   |        |                                  | Certainty                        | What happens                   |                            |        |                                  |                                  |                                                       |  |  |  |  |  |            |            |           |        |                   |  |                   |  |  |        |                   |              |     |    |  |  |                                                                                  |  |  |  |                                                       |  |  |  |  |  |            |           |           |        |                   |  |                   |  |  |        |                   |              |    |    |  |  |                                                                                 |  |  |  |                                                       |  |  |  |  |  |            |          |          |        |                   |  |                   |  |  |        |                   |              |    |    |  |  |                                                                                 |  |  |  |                         |                                                                                                                                                                                                                                                                                                                                      |
|--------------------------------------------------------------------------------------------------------------------------------------------------------------------------------------------------------------------------------------------------------------------------------------------------------------------------------------------------------------------------------------|---------------------------------------------------------------------------------------------------------------------------------------------------------------------------------------------------------------------------------------------------------------------------------------------------------------------------------------------------------------------------------------------------------------------------------------------------------------------------------------------------------------------------------------------------------------------------------------------|-------------------------------------------------------------------------------------------------------------------------------------------------------------------------------------------------------------------------------------------------------------------------------------------------------------------------------------------------------------------------------------------------------------------------------------------------------------------------------------------------------------------------------------------------------------------------------------------------------------------------------------------------------------------------------------------------------------------------------------------------------------------------------------------------------------------------------------------------------------------------------------------------------------------------------------------------------------------------------------------------------------------------------------------------------------------------------------------------------------------------------------------------------------------------------------------------------------------------------------------------------------------------------------------------------------------------------------------------------------------------------------------------------------------------------------------------------------------------------------------------------------------------------------------------------------------------------------------------------------------------------------------------------------------------------------------------------------------------------------------------------------------------------------------------------------------------------------------------------------------------|--------|----------------------------------|----------------------------------|--------------------------------|----------------------------|--------|----------------------------------|----------------------------------|-------------------------------------------------------|--|--|--|--|--|------------|------------|-----------|--------|-------------------|--|-------------------|--|--|--------|-------------------|--------------|-----|----|--|--|----------------------------------------------------------------------------------|--|--|--|-------------------------------------------------------|--|--|--|--|--|------------|-----------|-----------|--------|-------------------|--|-------------------|--|--|--------|-------------------|--------------|----|----|--|--|---------------------------------------------------------------------------------|--|--|--|-------------------------------------------------------|--|--|--|--|--|------------|----------|----------|--------|-------------------|--|-------------------|--|--|--------|-------------------|--------------|----|----|--|--|---------------------------------------------------------------------------------|--|--|--|-------------------------|--------------------------------------------------------------------------------------------------------------------------------------------------------------------------------------------------------------------------------------------------------------------------------------------------------------------------------------|
|                                                                                                                                                                                                                                                                                                                                                                                      |                                                                                                                                                                                                                                                                                                                                                                                                                                                                                                                                                                                             |                                                                                                                                                                                                                                                                                                                                                                                                                                                                                                                                                                                                                                                                                                                                                                                                                                                                                                                                                                                                                                                                                                                                                                                                                                                                                                                                                                                                                                                                                                                                                                                                                                                                                                                                                                                                                                                                         |        | Difference                       |                                  |                                |                            |        |                                  |                                  |                                                       |  |  |  |  |  |            |            |           |        |                   |  |                   |  |  |        |                   |              |     |    |  |  |                                                                                  |  |  |  |                                                       |  |  |  |  |  |            |           |           |        |                   |  |                   |  |  |        |                   |              |    |    |  |  |                                                                                 |  |  |  |                                                       |  |  |  |  |  |            |          |          |        |                   |  |                   |  |  |        |                   |              |    |    |  |  |                                                                                 |  |  |  |                         |                                                                                                                                                                                                                                                                                                                                      |
| <b>Quality of life (SGRQ responders defined as patients achieving a ≥4-point reduction from baseline in SGRQ total score)</b><br>assessed with: St George's Respiratory Questionnaire (SGRQ); Scale from: 0 to 100; higher scores indicate worse quality of life; MCID 4 units.<br>Follow up: 24 weeks<br>№ of participants: 456<br>(1 RCT) <sup>1</sup><br><br>Importance: CRITICAL | Percentage of patients treated with mepolizumab who achieved a ≥ 4 point reduction from baseline in SGRQ total score compared to placebo were: Eosinophil ≥ 150/uL: 73% versus 55%, RR (95%CI) = 1.33 (1.16 to 1.53), Absolute effect = 182 more per 1,000 (from 88 more to 292 more), n=456. Eosinophil ≥ 300/uL: 73% versus 54%, RR (95%CI) = 1.35 (1.14 to 1.61), Absolute effect = 189 more per 1,000 (from 76 more to 329 more), n=321. Eosinophil ≥ 500/uL: 74% versus 57%, RR (95%CI) = 1.29 (1.05 to 1.60), Absolute effect = 167 more per 1,000 (from 29 more to 345 more), n=187. | <table><thead><tr><th>Study or Subgroup</th><th>Mepolizumab<br/>Events<br/>Total</th><th>Placebo<br/>Events<br/>Total</th><th>Weight</th><th>Risk Ratio<br/>M-H, Fixed, 95% CI</th><th>Risk Ratio<br/>M-H, Fixed, 95% CI</th></tr></thead><tbody><tr><td colspan="6"><b>5.1.1 Baseline blood eosinophils ≥150 cells/μl</b></td></tr><tr><td>Chupp 2017</td><td>139<br/>222</td><td>96<br/>235</td><td>100.0%</td><td>1.53 [1.27, 1.84]</td><td rowspan="4"></td></tr><tr><td>Subtotal (95% CI)</td><td></td><td></td><td>100.0%</td><td>1.53 [1.27, 1.84]</td></tr><tr><td>Total events</td><td>139</td><td>96</td><td></td><td></td></tr><tr><td colspan="4">Heterogeneity: Not applicable<br/>Test for overall effect: Z = 4.54 (P &lt; 0.00001)</td></tr><tr><td colspan="6"><b>5.1.2 Baseline blood eosinophils ≥300 cells/μl</b></td></tr><tr><td>Chupp 2017</td><td>98<br/>156</td><td>62<br/>166</td><td>100.0%</td><td>1.68 [1.33, 2.12]</td><td rowspan="4"></td></tr><tr><td>Subtotal (95% CI)</td><td></td><td></td><td>100.0%</td><td>1.68 [1.33, 2.12]</td></tr><tr><td>Total events</td><td>98</td><td>62</td><td></td><td></td></tr><tr><td colspan="4">Heterogeneity: Not applicable<br/>Test for overall effect: Z = 4.41 (P &lt; 0.0001)</td></tr><tr><td colspan="6"><b>5.1.3 Baseline blood eosinophils ≥500 cells/μl</b></td></tr><tr><td>Chupp 2017</td><td>58<br/>93</td><td>35<br/>94</td><td>100.0%</td><td>1.67 [1.23, 2.28]</td><td rowspan="4"></td></tr><tr><td>Subtotal (95% CI)</td><td></td><td></td><td>100.0%</td><td>1.67 [1.23, 2.28]</td></tr><tr><td>Total events</td><td>58</td><td>35</td><td></td><td></td></tr><tr><td colspan="4">Heterogeneity: Not applicable<br/>Test for overall effect: Z = 3.30 (P = 0.0010)</td></tr></tbody></table> <div><div>0.50.711.52</div><div>Favours placebo Favours mepolizumab</div></div> |        |                                  | Study or Subgroup                | Mepolizumab<br>Events<br>Total | Placebo<br>Events<br>Total | Weight | Risk Ratio<br>M-H, Fixed, 95% CI | Risk Ratio<br>M-H, Fixed, 95% CI | <b>5.1.1 Baseline blood eosinophils ≥150 cells/μl</b> |  |  |  |  |  | Chupp 2017 | 139<br>222 | 96<br>235 | 100.0% | 1.53 [1.27, 1.84] |  | Subtotal (95% CI) |  |  | 100.0% | 1.53 [1.27, 1.84] | Total events | 139 | 96 |  |  | Heterogeneity: Not applicable<br>Test for overall effect: Z = 4.54 (P < 0.00001) |  |  |  | <b>5.1.2 Baseline blood eosinophils ≥300 cells/μl</b> |  |  |  |  |  | Chupp 2017 | 98<br>156 | 62<br>166 | 100.0% | 1.68 [1.33, 2.12] |  | Subtotal (95% CI) |  |  | 100.0% | 1.68 [1.33, 2.12] | Total events | 98 | 62 |  |  | Heterogeneity: Not applicable<br>Test for overall effect: Z = 4.41 (P < 0.0001) |  |  |  | <b>5.1.3 Baseline blood eosinophils ≥500 cells/μl</b> |  |  |  |  |  | Chupp 2017 | 58<br>93 | 35<br>94 | 100.0% | 1.67 [1.23, 2.28] |  | Subtotal (95% CI) |  |  | 100.0% | 1.67 [1.23, 2.28] | Total events | 58 | 35 |  |  | Heterogeneity: Not applicable<br>Test for overall effect: Z = 3.30 (P = 0.0010) |  |  |  | ⊕⊕⊕○<br>MODERATE<br>b,c | There are significant increases in the number of patients treated with mepolizumab compared to placebo who achieve a reduction of at least 4 points in the SGRQ total score. Increases are seen in patients with baseline blood eosinophil counts ≥150/uL, ≥300/uL and ≥500/uL. However there is appreciable overlap of the 95% CIs. |
| Study or Subgroup                                                                                                                                                                                                                                                                                                                                                                    | Mepolizumab<br>Events<br>Total                                                                                                                                                                                                                                                                                                                                                                                                                                                                                                                                                              | Placebo<br>Events<br>Total                                                                                                                                                                                                                                                                                                                                                                                                                                                                                                                                                                                                                                                                                                                                                                                                                                                                                                                                                                                                                                                                                                                                                                                                                                                                                                                                                                                                                                                                                                                                                                                                                                                                                                                                                                                                                                              | Weight | Risk Ratio<br>M-H, Fixed, 95% CI | Risk Ratio<br>M-H, Fixed, 95% CI |                                |                            |        |                                  |                                  |                                                       |  |  |  |  |  |            |            |           |        |                   |  |                   |  |  |        |                   |              |     |    |  |  |                                                                                  |  |  |  |                                                       |  |  |  |  |  |            |           |           |        |                   |  |                   |  |  |        |                   |              |    |    |  |  |                                                                                 |  |  |  |                                                       |  |  |  |  |  |            |          |          |        |                   |  |                   |  |  |        |                   |              |    |    |  |  |                                                                                 |  |  |  |                         |                                                                                                                                                                                                                                                                                                                                      |
| <b>5.1.1 Baseline blood eosinophils ≥150 cells/μl</b>                                                                                                                                                                                                                                                                                                                                |                                                                                                                                                                                                                                                                                                                                                                                                                                                                                                                                                                                             |                                                                                                                                                                                                                                                                                                                                                                                                                                                                                                                                                                                                                                                                                                                                                                                                                                                                                                                                                                                                                                                                                                                                                                                                                                                                                                                                                                                                                                                                                                                                                                                                                                                                                                                                                                                                                                                                         |        |                                  |                                  |                                |                            |        |                                  |                                  |                                                       |  |  |  |  |  |            |            |           |        |                   |  |                   |  |  |        |                   |              |     |    |  |  |                                                                                  |  |  |  |                                                       |  |  |  |  |  |            |           |           |        |                   |  |                   |  |  |        |                   |              |    |    |  |  |                                                                                 |  |  |  |                                                       |  |  |  |  |  |            |          |          |        |                   |  |                   |  |  |        |                   |              |    |    |  |  |                                                                                 |  |  |  |                         |                                                                                                                                                                                                                                                                                                                                      |
| Chupp 2017                                                                                                                                                                                                                                                                                                                                                                           | 139<br>222                                                                                                                                                                                                                                                                                                                                                                                                                                                                                                                                                                                  | 96<br>235                                                                                                                                                                                                                                                                                                                                                                                                                                                                                                                                                                                                                                                                                                                                                                                                                                                                                                                                                                                                                                                                                                                                                                                                                                                                                                                                                                                                                                                                                                                                                                                                                                                                                                                                                                                                                                                               | 100.0% | 1.53 [1.27, 1.84]                |                                  |                                |                            |        |                                  |                                  |                                                       |  |  |  |  |  |            |            |           |        |                   |  |                   |  |  |        |                   |              |     |    |  |  |                                                                                  |  |  |  |                                                       |  |  |  |  |  |            |           |           |        |                   |  |                   |  |  |        |                   |              |    |    |  |  |                                                                                 |  |  |  |                                                       |  |  |  |  |  |            |          |          |        |                   |  |                   |  |  |        |                   |              |    |    |  |  |                                                                                 |  |  |  |                         |                                                                                                                                                                                                                                                                                                                                      |
| Subtotal (95% CI)                                                                                                                                                                                                                                                                                                                                                                    |                                                                                                                                                                                                                                                                                                                                                                                                                                                                                                                                                                                             |                                                                                                                                                                                                                                                                                                                                                                                                                                                                                                                                                                                                                                                                                                                                                                                                                                                                                                                                                                                                                                                                                                                                                                                                                                                                                                                                                                                                                                                                                                                                                                                                                                                                                                                                                                                                                                                                         | 100.0% | 1.53 [1.27, 1.84]                |                                  |                                |                            |        |                                  |                                  |                                                       |  |  |  |  |  |            |            |           |        |                   |  |                   |  |  |        |                   |              |     |    |  |  |                                                                                  |  |  |  |                                                       |  |  |  |  |  |            |           |           |        |                   |  |                   |  |  |        |                   |              |    |    |  |  |                                                                                 |  |  |  |                                                       |  |  |  |  |  |            |          |          |        |                   |  |                   |  |  |        |                   |              |    |    |  |  |                                                                                 |  |  |  |                         |                                                                                                                                                                                                                                                                                                                                      |
| Total events                                                                                                                                                                                                                                                                                                                                                                         | 139                                                                                                                                                                                                                                                                                                                                                                                                                                                                                                                                                                                         | 96                                                                                                                                                                                                                                                                                                                                                                                                                                                                                                                                                                                                                                                                                                                                                                                                                                                                                                                                                                                                                                                                                                                                                                                                                                                                                                                                                                                                                                                                                                                                                                                                                                                                                                                                                                                                                                                                      |        |                                  |                                  |                                |                            |        |                                  |                                  |                                                       |  |  |  |  |  |            |            |           |        |                   |  |                   |  |  |        |                   |              |     |    |  |  |                                                                                  |  |  |  |                                                       |  |  |  |  |  |            |           |           |        |                   |  |                   |  |  |        |                   |              |    |    |  |  |                                                                                 |  |  |  |                                                       |  |  |  |  |  |            |          |          |        |                   |  |                   |  |  |        |                   |              |    |    |  |  |                                                                                 |  |  |  |                         |                                                                                                                                                                                                                                                                                                                                      |
| Heterogeneity: Not applicable<br>Test for overall effect: Z = 4.54 (P < 0.00001)                                                                                                                                                                                                                                                                                                     |                                                                                                                                                                                                                                                                                                                                                                                                                                                                                                                                                                                             |                                                                                                                                                                                                                                                                                                                                                                                                                                                                                                                                                                                                                                                                                                                                                                                                                                                                                                                                                                                                                                                                                                                                                                                                                                                                                                                                                                                                                                                                                                                                                                                                                                                                                                                                                                                                                                                                         |        |                                  |                                  |                                |                            |        |                                  |                                  |                                                       |  |  |  |  |  |            |            |           |        |                   |  |                   |  |  |        |                   |              |     |    |  |  |                                                                                  |  |  |  |                                                       |  |  |  |  |  |            |           |           |        |                   |  |                   |  |  |        |                   |              |    |    |  |  |                                                                                 |  |  |  |                                                       |  |  |  |  |  |            |          |          |        |                   |  |                   |  |  |        |                   |              |    |    |  |  |                                                                                 |  |  |  |                         |                                                                                                                                                                                                                                                                                                                                      |
| <b>5.1.2 Baseline blood eosinophils ≥300 cells/μl</b>                                                                                                                                                                                                                                                                                                                                |                                                                                                                                                                                                                                                                                                                                                                                                                                                                                                                                                                                             |                                                                                                                                                                                                                                                                                                                                                                                                                                                                                                                                                                                                                                                                                                                                                                                                                                                                                                                                                                                                                                                                                                                                                                                                                                                                                                                                                                                                                                                                                                                                                                                                                                                                                                                                                                                                                                                                         |        |                                  |                                  |                                |                            |        |                                  |                                  |                                                       |  |  |  |  |  |            |            |           |        |                   |  |                   |  |  |        |                   |              |     |    |  |  |                                                                                  |  |  |  |                                                       |  |  |  |  |  |            |           |           |        |                   |  |                   |  |  |        |                   |              |    |    |  |  |                                                                                 |  |  |  |                                                       |  |  |  |  |  |            |          |          |        |                   |  |                   |  |  |        |                   |              |    |    |  |  |                                                                                 |  |  |  |                         |                                                                                                                                                                                                                                                                                                                                      |
| Chupp 2017                                                                                                                                                                                                                                                                                                                                                                           | 98<br>156                                                                                                                                                                                                                                                                                                                                                                                                                                                                                                                                                                                   | 62<br>166                                                                                                                                                                                                                                                                                                                                                                                                                                                                                                                                                                                                                                                                                                                                                                                                                                                                                                                                                                                                                                                                                                                                                                                                                                                                                                                                                                                                                                                                                                                                                                                                                                                                                                                                                                                                                                                               | 100.0% | 1.68 [1.33, 2.12]                |                                  |                                |                            |        |                                  |                                  |                                                       |  |  |  |  |  |            |            |           |        |                   |  |                   |  |  |        |                   |              |     |    |  |  |                                                                                  |  |  |  |                                                       |  |  |  |  |  |            |           |           |        |                   |  |                   |  |  |        |                   |              |    |    |  |  |                                                                                 |  |  |  |                                                       |  |  |  |  |  |            |          |          |        |                   |  |                   |  |  |        |                   |              |    |    |  |  |                                                                                 |  |  |  |                         |                                                                                                                                                                                                                                                                                                                                      |
| Subtotal (95% CI)                                                                                                                                                                                                                                                                                                                                                                    |                                                                                                                                                                                                                                                                                                                                                                                                                                                                                                                                                                                             |                                                                                                                                                                                                                                                                                                                                                                                                                                                                                                                                                                                                                                                                                                                                                                                                                                                                                                                                                                                                                                                                                                                                                                                                                                                                                                                                                                                                                                                                                                                                                                                                                                                                                                                                                                                                                                                                         | 100.0% | 1.68 [1.33, 2.12]                |                                  |                                |                            |        |                                  |                                  |                                                       |  |  |  |  |  |            |            |           |        |                   |  |                   |  |  |        |                   |              |     |    |  |  |                                                                                  |  |  |  |                                                       |  |  |  |  |  |            |           |           |        |                   |  |                   |  |  |        |                   |              |    |    |  |  |                                                                                 |  |  |  |                                                       |  |  |  |  |  |            |          |          |        |                   |  |                   |  |  |        |                   |              |    |    |  |  |                                                                                 |  |  |  |                         |                                                                                                                                                                                                                                                                                                                                      |
| Total events                                                                                                                                                                                                                                                                                                                                                                         | 98                                                                                                                                                                                                                                                                                                                                                                                                                                                                                                                                                                                          | 62                                                                                                                                                                                                                                                                                                                                                                                                                                                                                                                                                                                                                                                                                                                                                                                                                                                                                                                                                                                                                                                                                                                                                                                                                                                                                                                                                                                                                                                                                                                                                                                                                                                                                                                                                                                                                                                                      |        |                                  |                                  |                                |                            |        |                                  |                                  |                                                       |  |  |  |  |  |            |            |           |        |                   |  |                   |  |  |        |                   |              |     |    |  |  |                                                                                  |  |  |  |                                                       |  |  |  |  |  |            |           |           |        |                   |  |                   |  |  |        |                   |              |    |    |  |  |                                                                                 |  |  |  |                                                       |  |  |  |  |  |            |          |          |        |                   |  |                   |  |  |        |                   |              |    |    |  |  |                                                                                 |  |  |  |                         |                                                                                                                                                                                                                                                                                                                                      |
| Heterogeneity: Not applicable<br>Test for overall effect: Z = 4.41 (P < 0.0001)                                                                                                                                                                                                                                                                                                      |                                                                                                                                                                                                                                                                                                                                                                                                                                                                                                                                                                                             |                                                                                                                                                                                                                                                                                                                                                                                                                                                                                                                                                                                                                                                                                                                                                                                                                                                                                                                                                                                                                                                                                                                                                                                                                                                                                                                                                                                                                                                                                                                                                                                                                                                                                                                                                                                                                                                                         |        |                                  |                                  |                                |                            |        |                                  |                                  |                                                       |  |  |  |  |  |            |            |           |        |                   |  |                   |  |  |        |                   |              |     |    |  |  |                                                                                  |  |  |  |                                                       |  |  |  |  |  |            |           |           |        |                   |  |                   |  |  |        |                   |              |    |    |  |  |                                                                                 |  |  |  |                                                       |  |  |  |  |  |            |          |          |        |                   |  |                   |  |  |        |                   |              |    |    |  |  |                                                                                 |  |  |  |                         |                                                                                                                                                                                                                                                                                                                                      |
| <b>5.1.3 Baseline blood eosinophils ≥500 cells/μl</b>                                                                                                                                                                                                                                                                                                                                |                                                                                                                                                                                                                                                                                                                                                                                                                                                                                                                                                                                             |                                                                                                                                                                                                                                                                                                                                                                                                                                                                                                                                                                                                                                                                                                                                                                                                                                                                                                                                                                                                                                                                                                                                                                                                                                                                                                                                                                                                                                                                                                                                                                                                                                                                                                                                                                                                                                                                         |        |                                  |                                  |                                |                            |        |                                  |                                  |                                                       |  |  |  |  |  |            |            |           |        |                   |  |                   |  |  |        |                   |              |     |    |  |  |                                                                                  |  |  |  |                                                       |  |  |  |  |  |            |           |           |        |                   |  |                   |  |  |        |                   |              |    |    |  |  |                                                                                 |  |  |  |                                                       |  |  |  |  |  |            |          |          |        |                   |  |                   |  |  |        |                   |              |    |    |  |  |                                                                                 |  |  |  |                         |                                                                                                                                                                                                                                                                                                                                      |
| Chupp 2017                                                                                                                                                                                                                                                                                                                                                                           | 58<br>93                                                                                                                                                                                                                                                                                                                                                                                                                                                                                                                                                                                    | 35<br>94                                                                                                                                                                                                                                                                                                                                                                                                                                                                                                                                                                                                                                                                                                                                                                                                                                                                                                                                                                                                                                                                                                                                                                                                                                                                                                                                                                                                                                                                                                                                                                                                                                                                                                                                                                                                                                                                | 100.0% | 1.67 [1.23, 2.28]                |                                  |                                |                            |        |                                  |                                  |                                                       |  |  |  |  |  |            |            |           |        |                   |  |                   |  |  |        |                   |              |     |    |  |  |                                                                                  |  |  |  |                                                       |  |  |  |  |  |            |           |           |        |                   |  |                   |  |  |        |                   |              |    |    |  |  |                                                                                 |  |  |  |                                                       |  |  |  |  |  |            |          |          |        |                   |  |                   |  |  |        |                   |              |    |    |  |  |                                                                                 |  |  |  |                         |                                                                                                                                                                                                                                                                                                                                      |
| Subtotal (95% CI)                                                                                                                                                                                                                                                                                                                                                                    |                                                                                                                                                                                                                                                                                                                                                                                                                                                                                                                                                                                             |                                                                                                                                                                                                                                                                                                                                                                                                                                                                                                                                                                                                                                                                                                                                                                                                                                                                                                                                                                                                                                                                                                                                                                                                                                                                                                                                                                                                                                                                                                                                                                                                                                                                                                                                                                                                                                                                         | 100.0% | 1.67 [1.23, 2.28]                |                                  |                                |                            |        |                                  |                                  |                                                       |  |  |  |  |  |            |            |           |        |                   |  |                   |  |  |        |                   |              |     |    |  |  |                                                                                  |  |  |  |                                                       |  |  |  |  |  |            |           |           |        |                   |  |                   |  |  |        |                   |              |    |    |  |  |                                                                                 |  |  |  |                                                       |  |  |  |  |  |            |          |          |        |                   |  |                   |  |  |        |                   |              |    |    |  |  |                                                                                 |  |  |  |                         |                                                                                                                                                                                                                                                                                                                                      |
| Total events                                                                                                                                                                                                                                                                                                                                                                         | 58                                                                                                                                                                                                                                                                                                                                                                                                                                                                                                                                                                                          | 35                                                                                                                                                                                                                                                                                                                                                                                                                                                                                                                                                                                                                                                                                                                                                                                                                                                                                                                                                                                                                                                                                                                                                                                                                                                                                                                                                                                                                                                                                                                                                                                                                                                                                                                                                                                                                                                                      |        |                                  |                                  |                                |                            |        |                                  |                                  |                                                       |  |  |  |  |  |            |            |           |        |                   |  |                   |  |  |        |                   |              |     |    |  |  |                                                                                  |  |  |  |                                                       |  |  |  |  |  |            |           |           |        |                   |  |                   |  |  |        |                   |              |    |    |  |  |                                                                                 |  |  |  |                                                       |  |  |  |  |  |            |          |          |        |                   |  |                   |  |  |        |                   |              |    |    |  |  |                                                                                 |  |  |  |                         |                                                                                                                                                                                                                                                                                                                                      |
| Heterogeneity: Not applicable<br>Test for overall effect: Z = 3.30 (P = 0.0010)                                                                                                                                                                                                                                                                                                      |                                                                                                                                                                                                                                                                                                                                                                                                                                                                                                                                                                                             |                                                                                                                                                                                                                                                                                                                                                                                                                                                                                                                                                                                                                                                                                                                                                                                                                                                                                                                                                                                                                                                                                                                                                                                                                                                                                                                                                                                                                                                                                                                                                                                                                                                                                                                                                                                                                                                                         |        |                                  |                                  |                                |                            |        |                                  |                                  |                                                       |  |  |  |  |  |            |            |           |        |                   |  |                   |  |  |        |                   |              |     |    |  |  |                                                                                  |  |  |  |                                                       |  |  |  |  |  |            |           |           |        |                   |  |                   |  |  |        |                   |              |    |    |  |  |                                                                                 |  |  |  |                                                       |  |  |  |  |  |            |          |          |        |                   |  |                   |  |  |        |                   |              |    |    |  |  |                                                                                 |  |  |  |                         |                                                                                                                                                                                                                                                                                                                                      |

| Outcome<br>№ of participants<br>(studies)                                                                                                                                                                                                                                                     | Relative effect<br>(95% CI)                                                                                                                                                                                                                                                                                                                                  | Anticipated absolute effects (95% CI)                                                                                                                                                                                                                                                                                                                                                                                                                                                                                                                                                                                                                                                                                                                                                                                                                                                                                                                                                                                                                                                                                                                                                                                                                                                                                                                                                                                                                                                    |               |                                   | Certainty         | What happens    |    |        |                                   |                                                        |  |  |  |  |             |      |        |        |                       |                          |  |  |               |                              |                                                                                  |  |  |  |  |                                                        |  |  |  |  |             |       |        |        |                        |                          |  |  |               |                               |                                                                                  |  |  |  |  |                                                        |  |  |  |  |             |       |     |        |                        |                          |  |  |               |                               |                                                                                  |  |  |  |  |                              |                                                                                                                                                                                                                                                                                                                               |
|-----------------------------------------------------------------------------------------------------------------------------------------------------------------------------------------------------------------------------------------------------------------------------------------------|--------------------------------------------------------------------------------------------------------------------------------------------------------------------------------------------------------------------------------------------------------------------------------------------------------------------------------------------------------------|------------------------------------------------------------------------------------------------------------------------------------------------------------------------------------------------------------------------------------------------------------------------------------------------------------------------------------------------------------------------------------------------------------------------------------------------------------------------------------------------------------------------------------------------------------------------------------------------------------------------------------------------------------------------------------------------------------------------------------------------------------------------------------------------------------------------------------------------------------------------------------------------------------------------------------------------------------------------------------------------------------------------------------------------------------------------------------------------------------------------------------------------------------------------------------------------------------------------------------------------------------------------------------------------------------------------------------------------------------------------------------------------------------------------------------------------------------------------------------------|---------------|-----------------------------------|-------------------|-----------------|----|--------|-----------------------------------|--------------------------------------------------------|--|--|--|--|-------------|------|--------|--------|-----------------------|--------------------------|--|--|---------------|------------------------------|----------------------------------------------------------------------------------|--|--|--|--|--------------------------------------------------------|--|--|--|--|-------------|-------|--------|--------|------------------------|--------------------------|--|--|---------------|-------------------------------|----------------------------------------------------------------------------------|--|--|--|--|--------------------------------------------------------|--|--|--|--|-------------|-------|-----|--------|------------------------|--------------------------|--|--|---------------|-------------------------------|----------------------------------------------------------------------------------|--|--|--|--|------------------------------|-------------------------------------------------------------------------------------------------------------------------------------------------------------------------------------------------------------------------------------------------------------------------------------------------------------------------------|
|                                                                                                                                                                                                                                                                                               |                                                                                                                                                                                                                                                                                                                                                              |                                                                                                                                                                                                                                                                                                                                                                                                                                                                                                                                                                                                                                                                                                                                                                                                                                                                                                                                                                                                                                                                                                                                                                                                                                                                                                                                                                                                                                                                                          |               | Difference                        |                   |                 |    |        |                                   |                                                        |  |  |  |  |             |      |        |        |                       |                          |  |  |               |                              |                                                                                  |  |  |  |  |                                                        |  |  |  |  |             |       |        |        |                        |                          |  |  |               |                               |                                                                                  |  |  |  |  |                                                        |  |  |  |  |             |       |     |        |                        |                          |  |  |               |                               |                                                                                  |  |  |  |  |                              |                                                                                                                                                                                                                                                                                                                               |
| <b>Quality of life (change from baseline)</b><br>assessed with: St George's Respiratory Questionnaire; Scale from: 0 to 100; higher scores indicate worse quality of life; MCID 4 units.<br>Follow up: 32 weeks<br>№ of participants: 420<br>(1 RCT) <sup>2</sup><br><br>Importance: CRITICAL | Mean change from baseline to week 32 in patients treated with mepolizumab compared to placebo were: Eosinophil ≥150/uL: Mean difference (95%CI) = -8.10 (-11.10 to -5.10), n=420. Eosinophil ≥300/uL: Mean difference (95%CI) = -10.40 (-14.10 to -6.70), n=288. Eosinophil ≥500/uL: Mean difference (95%CI) = -11.30 (-16.20 to -6.40), n=179. <sup>d</sup> | <table><thead><tr><th>Study or Subgroup</th><th>Mean Difference</th><th>SE</th><th>Weight</th><th>Mean Difference IV, Fixed, 95% CI</th></tr></thead><tbody><tr><td colspan="5"><b>5.4.1 Baseline blood eosinophils ≥ 150 cells/μl</b></td></tr><tr><td>Ortega 2016</td><td>-8.1</td><td>1.5306</td><td>100.0%</td><td>-8.10 [-11.10, -5.10]</td></tr><tr><td><b>Subtotal (95% CI)</b></td><td></td><td></td><td><b>100.0%</b></td><td><b>-8.10 [-11.10, -5.10]</b></td></tr><tr><td colspan="5">Heterogeneity: Not applicable<br/>Test for overall effect: Z = 5.29 (P &lt; 0.00001)</td></tr><tr><td colspan="5"><b>5.4.2 Baseline blood eosinophils ≥ 300 cells/μl</b></td></tr><tr><td>Ortega 2016</td><td>-10.4</td><td>1.8878</td><td>100.0%</td><td>-10.40 [-14.10, -6.70]</td></tr><tr><td><b>Subtotal (95% CI)</b></td><td></td><td></td><td><b>100.0%</b></td><td><b>-10.40 [-14.10, -6.70]</b></td></tr><tr><td colspan="5">Heterogeneity: Not applicable<br/>Test for overall effect: Z = 5.51 (P &lt; 0.00001)</td></tr><tr><td colspan="5"><b>5.4.3 Baseline blood eosinophils ≥ 500 cells/μl</b></td></tr><tr><td>Ortega 2016</td><td>-11.3</td><td>2.5</td><td>100.0%</td><td>-11.30 [-16.20, -6.40]</td></tr><tr><td><b>Subtotal (95% CI)</b></td><td></td><td></td><td><b>100.0%</b></td><td><b>-11.30 [-16.20, -6.40]</b></td></tr><tr><td colspan="5">Heterogeneity: Not applicable<br/>Test for overall effect: Z = 4.52 (P &lt; 0.00001)</td></tr></tbody></table> |               |                                   | Study or Subgroup | Mean Difference | SE | Weight | Mean Difference IV, Fixed, 95% CI | <b>5.4.1 Baseline blood eosinophils ≥ 150 cells/μl</b> |  |  |  |  | Ortega 2016 | -8.1 | 1.5306 | 100.0% | -8.10 [-11.10, -5.10] | <b>Subtotal (95% CI)</b> |  |  | <b>100.0%</b> | <b>-8.10 [-11.10, -5.10]</b> | Heterogeneity: Not applicable<br>Test for overall effect: Z = 5.29 (P < 0.00001) |  |  |  |  | <b>5.4.2 Baseline blood eosinophils ≥ 300 cells/μl</b> |  |  |  |  | Ortega 2016 | -10.4 | 1.8878 | 100.0% | -10.40 [-14.10, -6.70] | <b>Subtotal (95% CI)</b> |  |  | <b>100.0%</b> | <b>-10.40 [-14.10, -6.70]</b> | Heterogeneity: Not applicable<br>Test for overall effect: Z = 5.51 (P < 0.00001) |  |  |  |  | <b>5.4.3 Baseline blood eosinophils ≥ 500 cells/μl</b> |  |  |  |  | Ortega 2016 | -11.3 | 2.5 | 100.0% | -11.30 [-16.20, -6.40] | <b>Subtotal (95% CI)</b> |  |  | <b>100.0%</b> | <b>-11.30 [-16.20, -6.40]</b> | Heterogeneity: Not applicable<br>Test for overall effect: Z = 4.52 (P < 0.00001) |  |  |  |  | ⊕⊕○○<br>LOW <sup>b,c,e</sup> | There are significant improvements in respiratory symptoms measured by the SGRQ in patients treated with mepolizumab compared to placebo at 32 weeks of follow up. Improvements are seen in patients with baseline blood eosinophil counts ≥150/uL, ≥300/uL and ≥500/uL, however there is appreciable overlap of the 95% CIs. |
| Study or Subgroup                                                                                                                                                                                                                                                                             | Mean Difference                                                                                                                                                                                                                                                                                                                                              | SE                                                                                                                                                                                                                                                                                                                                                                                                                                                                                                                                                                                                                                                                                                                                                                                                                                                                                                                                                                                                                                                                                                                                                                                                                                                                                                                                                                                                                                                                                       | Weight        | Mean Difference IV, Fixed, 95% CI |                   |                 |    |        |                                   |                                                        |  |  |  |  |             |      |        |        |                       |                          |  |  |               |                              |                                                                                  |  |  |  |  |                                                        |  |  |  |  |             |       |        |        |                        |                          |  |  |               |                               |                                                                                  |  |  |  |  |                                                        |  |  |  |  |             |       |     |        |                        |                          |  |  |               |                               |                                                                                  |  |  |  |  |                              |                                                                                                                                                                                                                                                                                                                               |
| <b>5.4.1 Baseline blood eosinophils ≥ 150 cells/μl</b>                                                                                                                                                                                                                                        |                                                                                                                                                                                                                                                                                                                                                              |                                                                                                                                                                                                                                                                                                                                                                                                                                                                                                                                                                                                                                                                                                                                                                                                                                                                                                                                                                                                                                                                                                                                                                                                                                                                                                                                                                                                                                                                                          |               |                                   |                   |                 |    |        |                                   |                                                        |  |  |  |  |             |      |        |        |                       |                          |  |  |               |                              |                                                                                  |  |  |  |  |                                                        |  |  |  |  |             |       |        |        |                        |                          |  |  |               |                               |                                                                                  |  |  |  |  |                                                        |  |  |  |  |             |       |     |        |                        |                          |  |  |               |                               |                                                                                  |  |  |  |  |                              |                                                                                                                                                                                                                                                                                                                               |
| Ortega 2016                                                                                                                                                                                                                                                                                   | -8.1                                                                                                                                                                                                                                                                                                                                                         | 1.5306                                                                                                                                                                                                                                                                                                                                                                                                                                                                                                                                                                                                                                                                                                                                                                                                                                                                                                                                                                                                                                                                                                                                                                                                                                                                                                                                                                                                                                                                                   | 100.0%        | -8.10 [-11.10, -5.10]             |                   |                 |    |        |                                   |                                                        |  |  |  |  |             |      |        |        |                       |                          |  |  |               |                              |                                                                                  |  |  |  |  |                                                        |  |  |  |  |             |       |        |        |                        |                          |  |  |               |                               |                                                                                  |  |  |  |  |                                                        |  |  |  |  |             |       |     |        |                        |                          |  |  |               |                               |                                                                                  |  |  |  |  |                              |                                                                                                                                                                                                                                                                                                                               |
| <b>Subtotal (95% CI)</b>                                                                                                                                                                                                                                                                      |                                                                                                                                                                                                                                                                                                                                                              |                                                                                                                                                                                                                                                                                                                                                                                                                                                                                                                                                                                                                                                                                                                                                                                                                                                                                                                                                                                                                                                                                                                                                                                                                                                                                                                                                                                                                                                                                          | <b>100.0%</b> | <b>-8.10 [-11.10, -5.10]</b>      |                   |                 |    |        |                                   |                                                        |  |  |  |  |             |      |        |        |                       |                          |  |  |               |                              |                                                                                  |  |  |  |  |                                                        |  |  |  |  |             |       |        |        |                        |                          |  |  |               |                               |                                                                                  |  |  |  |  |                                                        |  |  |  |  |             |       |     |        |                        |                          |  |  |               |                               |                                                                                  |  |  |  |  |                              |                                                                                                                                                                                                                                                                                                                               |
| Heterogeneity: Not applicable<br>Test for overall effect: Z = 5.29 (P < 0.00001)                                                                                                                                                                                                              |                                                                                                                                                                                                                                                                                                                                                              |                                                                                                                                                                                                                                                                                                                                                                                                                                                                                                                                                                                                                                                                                                                                                                                                                                                                                                                                                                                                                                                                                                                                                                                                                                                                                                                                                                                                                                                                                          |               |                                   |                   |                 |    |        |                                   |                                                        |  |  |  |  |             |      |        |        |                       |                          |  |  |               |                              |                                                                                  |  |  |  |  |                                                        |  |  |  |  |             |       |        |        |                        |                          |  |  |               |                               |                                                                                  |  |  |  |  |                                                        |  |  |  |  |             |       |     |        |                        |                          |  |  |               |                               |                                                                                  |  |  |  |  |                              |                                                                                                                                                                                                                                                                                                                               |
| <b>5.4.2 Baseline blood eosinophils ≥ 300 cells/μl</b>                                                                                                                                                                                                                                        |                                                                                                                                                                                                                                                                                                                                                              |                                                                                                                                                                                                                                                                                                                                                                                                                                                                                                                                                                                                                                                                                                                                                                                                                                                                                                                                                                                                                                                                                                                                                                                                                                                                                                                                                                                                                                                                                          |               |                                   |                   |                 |    |        |                                   |                                                        |  |  |  |  |             |      |        |        |                       |                          |  |  |               |                              |                                                                                  |  |  |  |  |                                                        |  |  |  |  |             |       |        |        |                        |                          |  |  |               |                               |                                                                                  |  |  |  |  |                                                        |  |  |  |  |             |       |     |        |                        |                          |  |  |               |                               |                                                                                  |  |  |  |  |                              |                                                                                                                                                                                                                                                                                                                               |
| Ortega 2016                                                                                                                                                                                                                                                                                   | -10.4                                                                                                                                                                                                                                                                                                                                                        | 1.8878                                                                                                                                                                                                                                                                                                                                                                                                                                                                                                                                                                                                                                                                                                                                                                                                                                                                                                                                                                                                                                                                                                                                                                                                                                                                                                                                                                                                                                                                                   | 100.0%        | -10.40 [-14.10, -6.70]            |                   |                 |    |        |                                   |                                                        |  |  |  |  |             |      |        |        |                       |                          |  |  |               |                              |                                                                                  |  |  |  |  |                                                        |  |  |  |  |             |       |        |        |                        |                          |  |  |               |                               |                                                                                  |  |  |  |  |                                                        |  |  |  |  |             |       |     |        |                        |                          |  |  |               |                               |                                                                                  |  |  |  |  |                              |                                                                                                                                                                                                                                                                                                                               |
| <b>Subtotal (95% CI)</b>                                                                                                                                                                                                                                                                      |                                                                                                                                                                                                                                                                                                                                                              |                                                                                                                                                                                                                                                                                                                                                                                                                                                                                                                                                                                                                                                                                                                                                                                                                                                                                                                                                                                                                                                                                                                                                                                                                                                                                                                                                                                                                                                                                          | <b>100.0%</b> | <b>-10.40 [-14.10, -6.70]</b>     |                   |                 |    |        |                                   |                                                        |  |  |  |  |             |      |        |        |                       |                          |  |  |               |                              |                                                                                  |  |  |  |  |                                                        |  |  |  |  |             |       |        |        |                        |                          |  |  |               |                               |                                                                                  |  |  |  |  |                                                        |  |  |  |  |             |       |     |        |                        |                          |  |  |               |                               |                                                                                  |  |  |  |  |                              |                                                                                                                                                                                                                                                                                                                               |
| Heterogeneity: Not applicable<br>Test for overall effect: Z = 5.51 (P < 0.00001)                                                                                                                                                                                                              |                                                                                                                                                                                                                                                                                                                                                              |                                                                                                                                                                                                                                                                                                                                                                                                                                                                                                                                                                                                                                                                                                                                                                                                                                                                                                                                                                                                                                                                                                                                                                                                                                                                                                                                                                                                                                                                                          |               |                                   |                   |                 |    |        |                                   |                                                        |  |  |  |  |             |      |        |        |                       |                          |  |  |               |                              |                                                                                  |  |  |  |  |                                                        |  |  |  |  |             |       |        |        |                        |                          |  |  |               |                               |                                                                                  |  |  |  |  |                                                        |  |  |  |  |             |       |     |        |                        |                          |  |  |               |                               |                                                                                  |  |  |  |  |                              |                                                                                                                                                                                                                                                                                                                               |
| <b>5.4.3 Baseline blood eosinophils ≥ 500 cells/μl</b>                                                                                                                                                                                                                                        |                                                                                                                                                                                                                                                                                                                                                              |                                                                                                                                                                                                                                                                                                                                                                                                                                                                                                                                                                                                                                                                                                                                                                                                                                                                                                                                                                                                                                                                                                                                                                                                                                                                                                                                                                                                                                                                                          |               |                                   |                   |                 |    |        |                                   |                                                        |  |  |  |  |             |      |        |        |                       |                          |  |  |               |                              |                                                                                  |  |  |  |  |                                                        |  |  |  |  |             |       |        |        |                        |                          |  |  |               |                               |                                                                                  |  |  |  |  |                                                        |  |  |  |  |             |       |     |        |                        |                          |  |  |               |                               |                                                                                  |  |  |  |  |                              |                                                                                                                                                                                                                                                                                                                               |
| Ortega 2016                                                                                                                                                                                                                                                                                   | -11.3                                                                                                                                                                                                                                                                                                                                                        | 2.5                                                                                                                                                                                                                                                                                                                                                                                                                                                                                                                                                                                                                                                                                                                                                                                                                                                                                                                                                                                                                                                                                                                                                                                                                                                                                                                                                                                                                                                                                      | 100.0%        | -11.30 [-16.20, -6.40]            |                   |                 |    |        |                                   |                                                        |  |  |  |  |             |      |        |        |                       |                          |  |  |               |                              |                                                                                  |  |  |  |  |                                                        |  |  |  |  |             |       |        |        |                        |                          |  |  |               |                               |                                                                                  |  |  |  |  |                                                        |  |  |  |  |             |       |     |        |                        |                          |  |  |               |                               |                                                                                  |  |  |  |  |                              |                                                                                                                                                                                                                                                                                                                               |
| <b>Subtotal (95% CI)</b>                                                                                                                                                                                                                                                                      |                                                                                                                                                                                                                                                                                                                                                              |                                                                                                                                                                                                                                                                                                                                                                                                                                                                                                                                                                                                                                                                                                                                                                                                                                                                                                                                                                                                                                                                                                                                                                                                                                                                                                                                                                                                                                                                                          | <b>100.0%</b> | <b>-11.30 [-16.20, -6.40]</b>     |                   |                 |    |        |                                   |                                                        |  |  |  |  |             |      |        |        |                       |                          |  |  |               |                              |                                                                                  |  |  |  |  |                                                        |  |  |  |  |             |       |        |        |                        |                          |  |  |               |                               |                                                                                  |  |  |  |  |                                                        |  |  |  |  |             |       |     |        |                        |                          |  |  |               |                               |                                                                                  |  |  |  |  |                              |                                                                                                                                                                                                                                                                                                                               |
| Heterogeneity: Not applicable<br>Test for overall effect: Z = 4.52 (P < 0.00001)                                                                                                                                                                                                              |                                                                                                                                                                                                                                                                                                                                                              |                                                                                                                                                                                                                                                                                                                                                                                                                                                                                                                                                                                                                                                                                                                                                                                                                                                                                                                                                                                                                                                                                                                                                                                                                                                                                                                                                                                                                                                                                          |               |                                   |                   |                 |    |        |                                   |                                                        |  |  |  |  |             |      |        |        |                       |                          |  |  |               |                              |                                                                                  |  |  |  |  |                                                        |  |  |  |  |             |       |        |        |                        |                          |  |  |               |                               |                                                                                  |  |  |  |  |                                                        |  |  |  |  |             |       |     |        |                        |                          |  |  |               |                               |                                                                                  |  |  |  |  |                              |                                                                                                                                                                                                                                                                                                                               |

| Outcome<br>№ of participants<br>(studies)                                                                                                                                             | Relative effect<br>(95% CI)                                                                                                                                                                                                                                                                                                                                          | Anticipated absolute effects (95% CI)                                              |            | Certainty                   | What happens                                                                                                                                                                                                                                                                                                                                                               |
|---------------------------------------------------------------------------------------------------------------------------------------------------------------------------------------|----------------------------------------------------------------------------------------------------------------------------------------------------------------------------------------------------------------------------------------------------------------------------------------------------------------------------------------------------------------------|------------------------------------------------------------------------------------|------------|-----------------------------|----------------------------------------------------------------------------------------------------------------------------------------------------------------------------------------------------------------------------------------------------------------------------------------------------------------------------------------------------------------------------|
|                                                                                                                                                                                       |                                                                                                                                                                                                                                                                                                                                                                      |                                                                                    | Difference |                             |                                                                                                                                                                                                                                                                                                                                                                            |
| <b>Lung function (Pre-bronchodilator FEV1 litres, change from baseline);</b><br>MCID 0.23 liter <sup>4</sup><br>follow up: 32 weeks<br>№ of participants: 423<br>(1 RCT) <sup>2</sup> | Mean change from baseline to week 32 in patients treated with mepolizumab compared to placebo were:<br>Eosinophil ≥150/uL: Mean difference (95%CI) = 0.11 L (0.03 L to 0.20 L), n=423. Eosinophil ≥300/uL: Mean difference (95%CI) = 0.13 L (0.02 L to 0.23 L), n=290. Eosinophil ≥500/uL: Mean difference (95%CI) = 0.11 L (-0.02 L to 0.25 L), n=181. <sup>d</sup> | 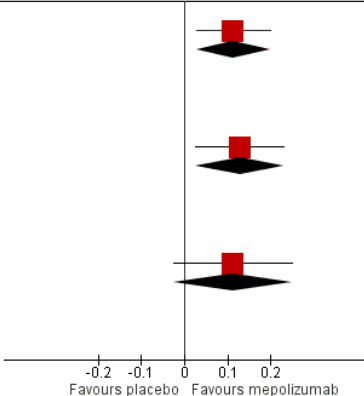 |            | ⊕○○○<br>VERY LOW<br>b,c,e,f | There is a significant change in pre-BD FEV1 (litres) with mepolizumab compared to placebo in the subgroups of patients with blood eosinophil counts ≥150/uL and ≥300/uL at 32 weeks of follow up, whereas there are no differences in similar terms for those patients with blood eosinophils ≥500/uL at the same follow up. There is appreciable overlap of the 95% CIs. |

Importance: IMPORTANT



| Outcome<br>№ of participants<br>(studies)                                                                                                                                                                           | Relative effect<br>(95% CI)                                                                                                                                                                                                                                                                                                                                         | Anticipated absolute effects (95% CI)                                                                                                                                                                                                                                                                                                                                                                                                                                                                                                                                                                                                                                                                                                                                                                                                                                                                                                                                                                                                                                                                                                                                                                                                                                                                                                                                                                                                                                                                                                                                                                                                                |               |                                      | Certainty                            | What happens    |    |        |                                      |                                      |                                                       |  |  |  |  |  |             |       |        |        |                   |  |                          |  |  |               |                          |                                                                                 |  |  |  |  |  |                                                       |  |  |  |  |  |             |       |        |        |                   |  |                          |  |  |               |                          |                                                                                 |  |  |  |  |  |                                                       |  |  |  |  |  |             |       |       |        |                   |  |                          |  |  |               |                          |                                                                                 |  |  |  |  |  |                             |                                                                                                                                                                                                                                                                   |
|---------------------------------------------------------------------------------------------------------------------------------------------------------------------------------------------------------------------|---------------------------------------------------------------------------------------------------------------------------------------------------------------------------------------------------------------------------------------------------------------------------------------------------------------------------------------------------------------------|------------------------------------------------------------------------------------------------------------------------------------------------------------------------------------------------------------------------------------------------------------------------------------------------------------------------------------------------------------------------------------------------------------------------------------------------------------------------------------------------------------------------------------------------------------------------------------------------------------------------------------------------------------------------------------------------------------------------------------------------------------------------------------------------------------------------------------------------------------------------------------------------------------------------------------------------------------------------------------------------------------------------------------------------------------------------------------------------------------------------------------------------------------------------------------------------------------------------------------------------------------------------------------------------------------------------------------------------------------------------------------------------------------------------------------------------------------------------------------------------------------------------------------------------------------------------------------------------------------------------------------------------------|---------------|--------------------------------------|--------------------------------------|-----------------|----|--------|--------------------------------------|--------------------------------------|-------------------------------------------------------|--|--|--|--|--|-------------|-------|--------|--------|-------------------|--|--------------------------|--|--|---------------|--------------------------|---------------------------------------------------------------------------------|--|--|--|--|--|-------------------------------------------------------|--|--|--|--|--|-------------|-------|--------|--------|-------------------|--|--------------------------|--|--|---------------|--------------------------|---------------------------------------------------------------------------------|--|--|--|--|--|-------------------------------------------------------|--|--|--|--|--|-------------|-------|-------|--------|-------------------|--|--------------------------|--|--|---------------|--------------------------|---------------------------------------------------------------------------------|--|--|--|--|--|-----------------------------|-------------------------------------------------------------------------------------------------------------------------------------------------------------------------------------------------------------------------------------------------------------------|
|                                                                                                                                                                                                                     |                                                                                                                                                                                                                                                                                                                                                                     |                                                                                                                                                                                                                                                                                                                                                                                                                                                                                                                                                                                                                                                                                                                                                                                                                                                                                                                                                                                                                                                                                                                                                                                                                                                                                                                                                                                                                                                                                                                                                                                                                                                      |               | Difference                           |                                      |                 |    |        |                                      |                                      |                                                       |  |  |  |  |  |             |       |        |        |                   |  |                          |  |  |               |                          |                                                                                 |  |  |  |  |  |                                                       |  |  |  |  |  |             |       |        |        |                   |  |                          |  |  |               |                          |                                                                                 |  |  |  |  |  |                                                       |  |  |  |  |  |             |       |       |        |                   |  |                          |  |  |               |                          |                                                                                 |  |  |  |  |  |                             |                                                                                                                                                                                                                                                                   |
| <b>Lung function (Post-bronchodilator FEV1 litres, change from baseline);</b><br>MCID 0.23 liter <sup>4</sup><br>follow up: 32 weeks<br>№ of participants: 386<br>(1 RCT) <sup>2</sup><br><br>Importance: IMPORTANT | Mean change from baseline to week 32 in patients treated with mepolizumab compared to placebo were:<br>Eosinophil ≥150/uL: Mean difference (95%CI) = 0.17 L (0.08 L to 0.27 L), n=386. Eosinophil ≥300/uL: Mean difference (95%CI) = 0.20 L (0.09 L to 0.31 L), n=268. Eosinophil ≥500/uL: Mean difference (95%CI) = 0.25 L (0.10 L to 0.39 L), n=166. <sup>d</sup> | <table><thead><tr><th>Study or Subgroup</th><th>Mean Difference</th><th>SE</th><th>Weight</th><th>Mean Difference<br/>IV, Fixed, 95% CI</th><th>Mean Difference<br/>IV, Fixed, 95% CI</th></tr></thead><tbody><tr><td colspan="6"><b>5.8.1 Baseline blood eosinophils ≥150 cells/μl</b></td></tr><tr><td>Ortega 2016</td><td>0.172</td><td>0.0485</td><td>100.0%</td><td>0.17 [0.08, 0.27]</td><td rowspan="2"></td></tr><tr><td><b>Subtotal (95% CI)</b></td><td></td><td></td><td><b>100.0%</b></td><td><b>0.17 [0.08, 0.27]</b></td></tr><tr><td colspan="6">Heterogeneity: Not applicable<br/>Test for overall effect: Z = 3.55 (P = 0.0004)</td></tr><tr><td colspan="6"><b>5.8.2 Baseline blood eosinophils ≥300 cells/μl</b></td></tr><tr><td>Ortega 2016</td><td>0.202</td><td>0.0571</td><td>100.0%</td><td>0.20 [0.09, 0.31]</td><td rowspan="2"></td></tr><tr><td><b>Subtotal (95% CI)</b></td><td></td><td></td><td><b>100.0%</b></td><td><b>0.20 [0.09, 0.31]</b></td></tr><tr><td colspan="6">Heterogeneity: Not applicable<br/>Test for overall effect: Z = 3.54 (P = 0.0004)</td></tr><tr><td colspan="6"><b>5.8.3 Baseline blood eosinophils ≥500 cells/μl</b></td></tr><tr><td>Ortega 2016</td><td>0.247</td><td>0.074</td><td>100.0%</td><td>0.25 [0.10, 0.39]</td><td rowspan="2"></td></tr><tr><td><b>Subtotal (95% CI)</b></td><td></td><td></td><td><b>100.0%</b></td><td><b>0.25 [0.10, 0.39]</b></td></tr><tr><td colspan="6">Heterogeneity: Not applicable<br/>Test for overall effect: Z = 3.34 (P = 0.0008)</td></tr></tbody></table> <div><div>-0.2-0.100.10.2</div><div>Favours placeboFavours mepolizumab</div></div> |               |                                      | Study or Subgroup                    | Mean Difference | SE | Weight | Mean Difference<br>IV, Fixed, 95% CI | Mean Difference<br>IV, Fixed, 95% CI | <b>5.8.1 Baseline blood eosinophils ≥150 cells/μl</b> |  |  |  |  |  | Ortega 2016 | 0.172 | 0.0485 | 100.0% | 0.17 [0.08, 0.27] |  | <b>Subtotal (95% CI)</b> |  |  | <b>100.0%</b> | <b>0.17 [0.08, 0.27]</b> | Heterogeneity: Not applicable<br>Test for overall effect: Z = 3.55 (P = 0.0004) |  |  |  |  |  | <b>5.8.2 Baseline blood eosinophils ≥300 cells/μl</b> |  |  |  |  |  | Ortega 2016 | 0.202 | 0.0571 | 100.0% | 0.20 [0.09, 0.31] |  | <b>Subtotal (95% CI)</b> |  |  | <b>100.0%</b> | <b>0.20 [0.09, 0.31]</b> | Heterogeneity: Not applicable<br>Test for overall effect: Z = 3.54 (P = 0.0004) |  |  |  |  |  | <b>5.8.3 Baseline blood eosinophils ≥500 cells/μl</b> |  |  |  |  |  | Ortega 2016 | 0.247 | 0.074 | 100.0% | 0.25 [0.10, 0.39] |  | <b>Subtotal (95% CI)</b> |  |  | <b>100.0%</b> | <b>0.25 [0.10, 0.39]</b> | Heterogeneity: Not applicable<br>Test for overall effect: Z = 3.34 (P = 0.0008) |  |  |  |  |  | ⊕○○○<br>VERY LOW<br>b,c,e,f | There is a significant change in post-BD FEV1 (litres) with mepolizumab compared to placebo in the subgroups of patients with blood eosinophil counts ≥150/uL, ≥300/uL and ≥500/uL at 32 weeks of follow up. However there is appreciable overlap of the 95% CIs. |
| Study or Subgroup                                                                                                                                                                                                   | Mean Difference                                                                                                                                                                                                                                                                                                                                                     | SE                                                                                                                                                                                                                                                                                                                                                                                                                                                                                                                                                                                                                                                                                                                                                                                                                                                                                                                                                                                                                                                                                                                                                                                                                                                                                                                                                                                                                                                                                                                                                                                                                                                   | Weight        | Mean Difference<br>IV, Fixed, 95% CI | Mean Difference<br>IV, Fixed, 95% CI |                 |    |        |                                      |                                      |                                                       |  |  |  |  |  |             |       |        |        |                   |  |                          |  |  |               |                          |                                                                                 |  |  |  |  |  |                                                       |  |  |  |  |  |             |       |        |        |                   |  |                          |  |  |               |                          |                                                                                 |  |  |  |  |  |                                                       |  |  |  |  |  |             |       |       |        |                   |  |                          |  |  |               |                          |                                                                                 |  |  |  |  |  |                             |                                                                                                                                                                                                                                                                   |
| <b>5.8.1 Baseline blood eosinophils ≥150 cells/μl</b>                                                                                                                                                               |                                                                                                                                                                                                                                                                                                                                                                     |                                                                                                                                                                                                                                                                                                                                                                                                                                                                                                                                                                                                                                                                                                                                                                                                                                                                                                                                                                                                                                                                                                                                                                                                                                                                                                                                                                                                                                                                                                                                                                                                                                                      |               |                                      |                                      |                 |    |        |                                      |                                      |                                                       |  |  |  |  |  |             |       |        |        |                   |  |                          |  |  |               |                          |                                                                                 |  |  |  |  |  |                                                       |  |  |  |  |  |             |       |        |        |                   |  |                          |  |  |               |                          |                                                                                 |  |  |  |  |  |                                                       |  |  |  |  |  |             |       |       |        |                   |  |                          |  |  |               |                          |                                                                                 |  |  |  |  |  |                             |                                                                                                                                                                                                                                                                   |
| Ortega 2016                                                                                                                                                                                                         | 0.172                                                                                                                                                                                                                                                                                                                                                               | 0.0485                                                                                                                                                                                                                                                                                                                                                                                                                                                                                                                                                                                                                                                                                                                                                                                                                                                                                                                                                                                                                                                                                                                                                                                                                                                                                                                                                                                                                                                                                                                                                                                                                                               | 100.0%        | 0.17 [0.08, 0.27]                    |                                      |                 |    |        |                                      |                                      |                                                       |  |  |  |  |  |             |       |        |        |                   |  |                          |  |  |               |                          |                                                                                 |  |  |  |  |  |                                                       |  |  |  |  |  |             |       |        |        |                   |  |                          |  |  |               |                          |                                                                                 |  |  |  |  |  |                                                       |  |  |  |  |  |             |       |       |        |                   |  |                          |  |  |               |                          |                                                                                 |  |  |  |  |  |                             |                                                                                                                                                                                                                                                                   |
| <b>Subtotal (95% CI)</b>                                                                                                                                                                                            |                                                                                                                                                                                                                                                                                                                                                                     |                                                                                                                                                                                                                                                                                                                                                                                                                                                                                                                                                                                                                                                                                                                                                                                                                                                                                                                                                                                                                                                                                                                                                                                                                                                                                                                                                                                                                                                                                                                                                                                                                                                      | <b>100.0%</b> | <b>0.17 [0.08, 0.27]</b>             |                                      |                 |    |        |                                      |                                      |                                                       |  |  |  |  |  |             |       |        |        |                   |  |                          |  |  |               |                          |                                                                                 |  |  |  |  |  |                                                       |  |  |  |  |  |             |       |        |        |                   |  |                          |  |  |               |                          |                                                                                 |  |  |  |  |  |                                                       |  |  |  |  |  |             |       |       |        |                   |  |                          |  |  |               |                          |                                                                                 |  |  |  |  |  |                             |                                                                                                                                                                                                                                                                   |
| Heterogeneity: Not applicable<br>Test for overall effect: Z = 3.55 (P = 0.0004)                                                                                                                                     |                                                                                                                                                                                                                                                                                                                                                                     |                                                                                                                                                                                                                                                                                                                                                                                                                                                                                                                                                                                                                                                                                                                                                                                                                                                                                                                                                                                                                                                                                                                                                                                                                                                                                                                                                                                                                                                                                                                                                                                                                                                      |               |                                      |                                      |                 |    |        |                                      |                                      |                                                       |  |  |  |  |  |             |       |        |        |                   |  |                          |  |  |               |                          |                                                                                 |  |  |  |  |  |                                                       |  |  |  |  |  |             |       |        |        |                   |  |                          |  |  |               |                          |                                                                                 |  |  |  |  |  |                                                       |  |  |  |  |  |             |       |       |        |                   |  |                          |  |  |               |                          |                                                                                 |  |  |  |  |  |                             |                                                                                                                                                                                                                                                                   |
| <b>5.8.2 Baseline blood eosinophils ≥300 cells/μl</b>                                                                                                                                                               |                                                                                                                                                                                                                                                                                                                                                                     |                                                                                                                                                                                                                                                                                                                                                                                                                                                                                                                                                                                                                                                                                                                                                                                                                                                                                                                                                                                                                                                                                                                                                                                                                                                                                                                                                                                                                                                                                                                                                                                                                                                      |               |                                      |                                      |                 |    |        |                                      |                                      |                                                       |  |  |  |  |  |             |       |        |        |                   |  |                          |  |  |               |                          |                                                                                 |  |  |  |  |  |                                                       |  |  |  |  |  |             |       |        |        |                   |  |                          |  |  |               |                          |                                                                                 |  |  |  |  |  |                                                       |  |  |  |  |  |             |       |       |        |                   |  |                          |  |  |               |                          |                                                                                 |  |  |  |  |  |                             |                                                                                                                                                                                                                                                                   |
| Ortega 2016                                                                                                                                                                                                         | 0.202                                                                                                                                                                                                                                                                                                                                                               | 0.0571                                                                                                                                                                                                                                                                                                                                                                                                                                                                                                                                                                                                                                                                                                                                                                                                                                                                                                                                                                                                                                                                                                                                                                                                                                                                                                                                                                                                                                                                                                                                                                                                                                               | 100.0%        | 0.20 [0.09, 0.31]                    |                                      |                 |    |        |                                      |                                      |                                                       |  |  |  |  |  |             |       |        |        |                   |  |                          |  |  |               |                          |                                                                                 |  |  |  |  |  |                                                       |  |  |  |  |  |             |       |        |        |                   |  |                          |  |  |               |                          |                                                                                 |  |  |  |  |  |                                                       |  |  |  |  |  |             |       |       |        |                   |  |                          |  |  |               |                          |                                                                                 |  |  |  |  |  |                             |                                                                                                                                                                                                                                                                   |
| <b>Subtotal (95% CI)</b>                                                                                                                                                                                            |                                                                                                                                                                                                                                                                                                                                                                     |                                                                                                                                                                                                                                                                                                                                                                                                                                                                                                                                                                                                                                                                                                                                                                                                                                                                                                                                                                                                                                                                                                                                                                                                                                                                                                                                                                                                                                                                                                                                                                                                                                                      | <b>100.0%</b> | <b>0.20 [0.09, 0.31]</b>             |                                      |                 |    |        |                                      |                                      |                                                       |  |  |  |  |  |             |       |        |        |                   |  |                          |  |  |               |                          |                                                                                 |  |  |  |  |  |                                                       |  |  |  |  |  |             |       |        |        |                   |  |                          |  |  |               |                          |                                                                                 |  |  |  |  |  |                                                       |  |  |  |  |  |             |       |       |        |                   |  |                          |  |  |               |                          |                                                                                 |  |  |  |  |  |                             |                                                                                                                                                                                                                                                                   |
| Heterogeneity: Not applicable<br>Test for overall effect: Z = 3.54 (P = 0.0004)                                                                                                                                     |                                                                                                                                                                                                                                                                                                                                                                     |                                                                                                                                                                                                                                                                                                                                                                                                                                                                                                                                                                                                                                                                                                                                                                                                                                                                                                                                                                                                                                                                                                                                                                                                                                                                                                                                                                                                                                                                                                                                                                                                                                                      |               |                                      |                                      |                 |    |        |                                      |                                      |                                                       |  |  |  |  |  |             |       |        |        |                   |  |                          |  |  |               |                          |                                                                                 |  |  |  |  |  |                                                       |  |  |  |  |  |             |       |        |        |                   |  |                          |  |  |               |                          |                                                                                 |  |  |  |  |  |                                                       |  |  |  |  |  |             |       |       |        |                   |  |                          |  |  |               |                          |                                                                                 |  |  |  |  |  |                             |                                                                                                                                                                                                                                                                   |
| <b>5.8.3 Baseline blood eosinophils ≥500 cells/μl</b>                                                                                                                                                               |                                                                                                                                                                                                                                                                                                                                                                     |                                                                                                                                                                                                                                                                                                                                                                                                                                                                                                                                                                                                                                                                                                                                                                                                                                                                                                                                                                                                                                                                                                                                                                                                                                                                                                                                                                                                                                                                                                                                                                                                                                                      |               |                                      |                                      |                 |    |        |                                      |                                      |                                                       |  |  |  |  |  |             |       |        |        |                   |  |                          |  |  |               |                          |                                                                                 |  |  |  |  |  |                                                       |  |  |  |  |  |             |       |        |        |                   |  |                          |  |  |               |                          |                                                                                 |  |  |  |  |  |                                                       |  |  |  |  |  |             |       |       |        |                   |  |                          |  |  |               |                          |                                                                                 |  |  |  |  |  |                             |                                                                                                                                                                                                                                                                   |
| Ortega 2016                                                                                                                                                                                                         | 0.247                                                                                                                                                                                                                                                                                                                                                               | 0.074                                                                                                                                                                                                                                                                                                                                                                                                                                                                                                                                                                                                                                                                                                                                                                                                                                                                                                                                                                                                                                                                                                                                                                                                                                                                                                                                                                                                                                                                                                                                                                                                                                                | 100.0%        | 0.25 [0.10, 0.39]                    |                                      |                 |    |        |                                      |                                      |                                                       |  |  |  |  |  |             |       |        |        |                   |  |                          |  |  |               |                          |                                                                                 |  |  |  |  |  |                                                       |  |  |  |  |  |             |       |        |        |                   |  |                          |  |  |               |                          |                                                                                 |  |  |  |  |  |                                                       |  |  |  |  |  |             |       |       |        |                   |  |                          |  |  |               |                          |                                                                                 |  |  |  |  |  |                             |                                                                                                                                                                                                                                                                   |
| <b>Subtotal (95% CI)</b>                                                                                                                                                                                            |                                                                                                                                                                                                                                                                                                                                                                     |                                                                                                                                                                                                                                                                                                                                                                                                                                                                                                                                                                                                                                                                                                                                                                                                                                                                                                                                                                                                                                                                                                                                                                                                                                                                                                                                                                                                                                                                                                                                                                                                                                                      | <b>100.0%</b> | <b>0.25 [0.10, 0.39]</b>             |                                      |                 |    |        |                                      |                                      |                                                       |  |  |  |  |  |             |       |        |        |                   |  |                          |  |  |               |                          |                                                                                 |  |  |  |  |  |                                                       |  |  |  |  |  |             |       |        |        |                   |  |                          |  |  |               |                          |                                                                                 |  |  |  |  |  |                                                       |  |  |  |  |  |             |       |       |        |                   |  |                          |  |  |               |                          |                                                                                 |  |  |  |  |  |                             |                                                                                                                                                                                                                                                                   |
| Heterogeneity: Not applicable<br>Test for overall effect: Z = 3.34 (P = 0.0008)                                                                                                                                     |                                                                                                                                                                                                                                                                                                                                                                     |                                                                                                                                                                                                                                                                                                                                                                                                                                                                                                                                                                                                                                                                                                                                                                                                                                                                                                                                                                                                                                                                                                                                                                                                                                                                                                                                                                                                                                                                                                                                                                                                                                                      |               |                                      |                                      |                 |    |        |                                      |                                      |                                                       |  |  |  |  |  |             |       |        |        |                   |  |                          |  |  |               |                          |                                                                                 |  |  |  |  |  |                                                       |  |  |  |  |  |             |       |        |        |                   |  |                          |  |  |               |                          |                                                                                 |  |  |  |  |  |                                                       |  |  |  |  |  |             |       |       |        |                   |  |                          |  |  |               |                          |                                                                                 |  |  |  |  |  |                             |                                                                                                                                                                                                                                                                   |

| Outcome<br>№ of participants<br>(studies)                                                                                                                                                      | Relative effect<br>(95% CI)                                                                                                                                                                                                                                                                                                                                                                                                                      | Anticipated absolute effects (95% CI)                                              |  |  |            | Certainty                    | What happens                                                                                                                                                                                                                        |
|------------------------------------------------------------------------------------------------------------------------------------------------------------------------------------------------|--------------------------------------------------------------------------------------------------------------------------------------------------------------------------------------------------------------------------------------------------------------------------------------------------------------------------------------------------------------------------------------------------------------------------------------------------|------------------------------------------------------------------------------------|--|--|------------|------------------------------|-------------------------------------------------------------------------------------------------------------------------------------------------------------------------------------------------------------------------------------|
|                                                                                                                                                                                                |                                                                                                                                                                                                                                                                                                                                                                                                                                                  |                                                                                    |  |  | Difference |                              |                                                                                                                                                                                                                                     |
| <b>Exacerbation rate (mean exacerbation rate per patient per year);</b> lower rates, greater reduction in exacerbations; Follow up: 32 weeks<br>№ of participants: 453<br>(1 RCT) <sup>2</sup> | Annualised mean exacerbation rates per patient treated with mepolizumab compared to placebo were:<br>Eosinophil ≥150/uL: 0.78 vs 1.65, Rate ratio (95%CI) = 0.47 (0.35 to 0.63), n=453. Eosinophil ≥300/uL: 0.78 vs 1.98, Rate ratio (95%CI) = 0.39 (0.28 to 0.55), n=308. Eosinophil ≥400/uL: 0.66 vs 2.06, Rate ratio (95%CI) = 0.32 (0.22 to 0.46), n=248. Eosinophil ≥500/uL: 0.58 vs 2.11, Rate ratio (95%CI) = 0.27 (0.18 to 0.41), n=190. | 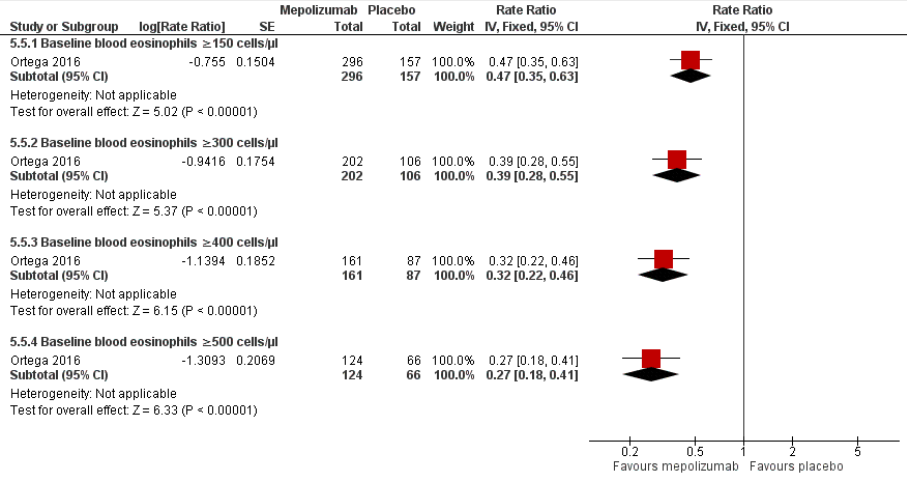 |  |  |            | ⊕⊕○○<br>LOW <sup>b,c,e</sup> | There is a significant reduction of exacerbation rates with mepolizumab compared to placebo in those patients with baseline blood eosinophil counts ≥150/uL, ≥300/uL, ≥400/uL and ≥500/uL. However there is overlap of the 95% CIs. |

Importance: CRITICAL

| Outcome<br>N <sub>e</sub> of participants<br>(studies)                                                                                                                                                                                     | Relative effect<br>(95% CI)                                                                                                                                                                                                                                                                                                                                                                                                                                                                           | Anticipated absolute effects (95% CI)                                                                                                                                                                                                                                                                                                                                                                                                                                                                                                                                                                                                                                                                                                                                                                                                                                                                                                                                                                                                                                                                                                                                                                                                                                                                                                                                                                                                                                                                                                                                                                                                                                                                                                                                                                                                                                                                                                                                                                                                                                                                                                                                                                                                                                                                                                                                                                                                              |                   |               | Certainty         | What happens                 |    |                   |               |        |                              |                                                          |  |  |  |  |  |  |             |        |        |    |    |        |                   |                          |  |  |           |           |               |                          |                                                                               |  |  |  |  |  |  |                                                                 |  |  |  |  |  |  |             |         |        |    |    |        |                   |                          |  |  |           |           |               |                          |                                                                               |  |  |  |  |  |  |                                                                 |  |  |  |  |  |  |             |         |        |    |    |        |                   |                          |  |  |           |           |               |                          |                                                                               |  |  |  |  |  |  |                                                       |  |  |  |  |  |  |             |         |        |     |    |        |                   |                          |  |  |            |           |               |                          |                                                                                  |  |  |  |  |  |  |                                                                                                   |  |  |  |  |  |  |                              |                                                                                                                                                                                                                                                                                                                        |
|--------------------------------------------------------------------------------------------------------------------------------------------------------------------------------------------------------------------------------------------|-------------------------------------------------------------------------------------------------------------------------------------------------------------------------------------------------------------------------------------------------------------------------------------------------------------------------------------------------------------------------------------------------------------------------------------------------------------------------------------------------------|----------------------------------------------------------------------------------------------------------------------------------------------------------------------------------------------------------------------------------------------------------------------------------------------------------------------------------------------------------------------------------------------------------------------------------------------------------------------------------------------------------------------------------------------------------------------------------------------------------------------------------------------------------------------------------------------------------------------------------------------------------------------------------------------------------------------------------------------------------------------------------------------------------------------------------------------------------------------------------------------------------------------------------------------------------------------------------------------------------------------------------------------------------------------------------------------------------------------------------------------------------------------------------------------------------------------------------------------------------------------------------------------------------------------------------------------------------------------------------------------------------------------------------------------------------------------------------------------------------------------------------------------------------------------------------------------------------------------------------------------------------------------------------------------------------------------------------------------------------------------------------------------------------------------------------------------------------------------------------------------------------------------------------------------------------------------------------------------------------------------------------------------------------------------------------------------------------------------------------------------------------------------------------------------------------------------------------------------------------------------------------------------------------------------------------------------------|-------------------|---------------|-------------------|------------------------------|----|-------------------|---------------|--------|------------------------------|----------------------------------------------------------|--|--|--|--|--|--|-------------|--------|--------|----|----|--------|-------------------|--------------------------|--|--|-----------|-----------|---------------|--------------------------|-------------------------------------------------------------------------------|--|--|--|--|--|--|-----------------------------------------------------------------|--|--|--|--|--|--|-------------|---------|--------|----|----|--------|-------------------|--------------------------|--|--|-----------|-----------|---------------|--------------------------|-------------------------------------------------------------------------------|--|--|--|--|--|--|-----------------------------------------------------------------|--|--|--|--|--|--|-------------|---------|--------|----|----|--------|-------------------|--------------------------|--|--|-----------|-----------|---------------|--------------------------|-------------------------------------------------------------------------------|--|--|--|--|--|--|-------------------------------------------------------|--|--|--|--|--|--|-------------|---------|--------|-----|----|--------|-------------------|--------------------------|--|--|------------|-----------|---------------|--------------------------|----------------------------------------------------------------------------------|--|--|--|--|--|--|---------------------------------------------------------------------------------------------------|--|--|--|--|--|--|------------------------------|------------------------------------------------------------------------------------------------------------------------------------------------------------------------------------------------------------------------------------------------------------------------------------------------------------------------|
|                                                                                                                                                                                                                                            |                                                                                                                                                                                                                                                                                                                                                                                                                                                                                                       |                                                                                                                                                                                                                                                                                                                                                                                                                                                                                                                                                                                                                                                                                                                                                                                                                                                                                                                                                                                                                                                                                                                                                                                                                                                                                                                                                                                                                                                                                                                                                                                                                                                                                                                                                                                                                                                                                                                                                                                                                                                                                                                                                                                                                                                                                                                                                                                                                                                    |                   | Difference    |                   |                              |    |                   |               |        |                              |                                                          |  |  |  |  |  |  |             |        |        |    |    |        |                   |                          |  |  |           |           |               |                          |                                                                               |  |  |  |  |  |  |                                                                 |  |  |  |  |  |  |             |         |        |    |    |        |                   |                          |  |  |           |           |               |                          |                                                                               |  |  |  |  |  |  |                                                                 |  |  |  |  |  |  |             |         |        |    |    |        |                   |                          |  |  |           |           |               |                          |                                                                               |  |  |  |  |  |  |                                                       |  |  |  |  |  |  |             |         |        |     |    |        |                   |                          |  |  |            |           |               |                          |                                                                                  |  |  |  |  |  |  |                                                                                                   |  |  |  |  |  |  |                              |                                                                                                                                                                                                                                                                                                                        |
| <b>Exacerbation rate (mean exacerbation rate per patient per year);</b> lower rates, greater reduction in exacerbations;<br>Follow up: 32 weeks<br>N <sub>e</sub> of participants: 569<br>(1 RCT) <sup>2</sup><br><br>Importance: CRITICAL | Annualised mean exacerbation rates per patient treated with mepolizumab compared to placebo were:<br>Eosinophil <150/uL: 1.19 vs 1.92, Rate ratio (95%CI) = 0.62 (0.37 to 1.05), n=116. Eosinophil 150 to <300/uL: 0.66 vs 1.02, Rate ratio (95%CI) = 0.64 (0.35 to 1.16), n=145. Eosinophil 300 to <500/uL: 1.01 vs 1.66, Rate ratio (95%CI) = 0.61 (0.35 to 1.07), n=118. Eosinophil ≥500/uL: 0.58 vs 2.11, Rate ratio (95%CI) = 0.27 (0.18 to 0.41), n=190. Test for subgroup differences, p=0.02. | <table border="1"> <thead> <tr> <th>Study or Subgroup</th> <th>log[Rate Ratio]</th> <th>SE</th> <th>Mepolizumab Total</th> <th>Placebo Total</th> <th>Weight</th> <th>Rate Ratio IV, Fixed, 95% CI</th> </tr> </thead> <tbody> <tr> <td colspan="7"><b>5.6.1 Baseline blood eosinophils &lt;150 cells/μl</b></td> </tr> <tr> <td>Ortega 2016</td> <td>-0.478</td> <td>0.2688</td> <td>84</td> <td>32</td> <td>100.0%</td> <td>0.62 [0.37, 1.05]</td> </tr> <tr> <td><b>Subtotal (95% CI)</b></td> <td></td> <td></td> <td><b>84</b></td> <td><b>32</b></td> <td><b>100.0%</b></td> <td><b>0.62 [0.37, 1.05]</b></td> </tr> <tr> <td colspan="7">Heterogeneity: Not applicable<br/>Test for overall effect: Z = 1.78 (P = 0.08)</td> </tr> <tr> <td colspan="7"><b>5.6.2 Baseline blood eosinophils 150 to &lt;300 cells/μl</b></td> </tr> <tr> <td>Ortega 2016</td> <td>-0.4463</td> <td>0.3034</td> <td>94</td> <td>51</td> <td>100.0%</td> <td>0.64 [0.35, 1.16]</td> </tr> <tr> <td><b>Subtotal (95% CI)</b></td> <td></td> <td></td> <td><b>94</b></td> <td><b>51</b></td> <td><b>100.0%</b></td> <td><b>0.64 [0.35, 1.16]</b></td> </tr> <tr> <td colspan="7">Heterogeneity: Not applicable<br/>Test for overall effect: Z = 1.47 (P = 0.14)</td> </tr> <tr> <td colspan="7"><b>5.6.3 Baseline blood eosinophils 300 to &lt;500 cells/μl</b></td> </tr> <tr> <td>Ortega 2016</td> <td>-0.4943</td> <td>0.2867</td> <td>78</td> <td>40</td> <td>100.0%</td> <td>0.61 [0.35, 1.07]</td> </tr> <tr> <td><b>Subtotal (95% CI)</b></td> <td></td> <td></td> <td><b>78</b></td> <td><b>40</b></td> <td><b>100.0%</b></td> <td><b>0.61 [0.35, 1.07]</b></td> </tr> <tr> <td colspan="7">Heterogeneity: Not applicable<br/>Test for overall effect: Z = 1.72 (P = 0.08)</td> </tr> <tr> <td colspan="7"><b>5.6.4 Baseline blood eosinophils ≥500 cells/μl</b></td> </tr> <tr> <td>Ortega 2016</td> <td>-1.3093</td> <td>0.2069</td> <td>124</td> <td>66</td> <td>100.0%</td> <td>0.27 [0.18, 0.41]</td> </tr> <tr> <td><b>Subtotal (95% CI)</b></td> <td></td> <td></td> <td><b>124</b></td> <td><b>66</b></td> <td><b>100.0%</b></td> <td><b>0.27 [0.18, 0.41]</b></td> </tr> <tr> <td colspan="7">Heterogeneity: Not applicable<br/>Test for overall effect: Z = 6.33 (P &lt; 0.00001)</td> </tr> <tr> <td colspan="7">Test for subgroup differences: Chi<sup>2</sup> = 9.99, df = 3 (P = 0.02), I<sup>2</sup> = 70.0%</td> </tr> </tbody> </table> |                   |               | Study or Subgroup | log[Rate Ratio]              | SE | Mepolizumab Total | Placebo Total | Weight | Rate Ratio IV, Fixed, 95% CI | <b>5.6.1 Baseline blood eosinophils &lt;150 cells/μl</b> |  |  |  |  |  |  | Ortega 2016 | -0.478 | 0.2688 | 84 | 32 | 100.0% | 0.62 [0.37, 1.05] | <b>Subtotal (95% CI)</b> |  |  | <b>84</b> | <b>32</b> | <b>100.0%</b> | <b>0.62 [0.37, 1.05]</b> | Heterogeneity: Not applicable<br>Test for overall effect: Z = 1.78 (P = 0.08) |  |  |  |  |  |  | <b>5.6.2 Baseline blood eosinophils 150 to &lt;300 cells/μl</b> |  |  |  |  |  |  | Ortega 2016 | -0.4463 | 0.3034 | 94 | 51 | 100.0% | 0.64 [0.35, 1.16] | <b>Subtotal (95% CI)</b> |  |  | <b>94</b> | <b>51</b> | <b>100.0%</b> | <b>0.64 [0.35, 1.16]</b> | Heterogeneity: Not applicable<br>Test for overall effect: Z = 1.47 (P = 0.14) |  |  |  |  |  |  | <b>5.6.3 Baseline blood eosinophils 300 to &lt;500 cells/μl</b> |  |  |  |  |  |  | Ortega 2016 | -0.4943 | 0.2867 | 78 | 40 | 100.0% | 0.61 [0.35, 1.07] | <b>Subtotal (95% CI)</b> |  |  | <b>78</b> | <b>40</b> | <b>100.0%</b> | <b>0.61 [0.35, 1.07]</b> | Heterogeneity: Not applicable<br>Test for overall effect: Z = 1.72 (P = 0.08) |  |  |  |  |  |  | <b>5.6.4 Baseline blood eosinophils ≥500 cells/μl</b> |  |  |  |  |  |  | Ortega 2016 | -1.3093 | 0.2069 | 124 | 66 | 100.0% | 0.27 [0.18, 0.41] | <b>Subtotal (95% CI)</b> |  |  | <b>124</b> | <b>66</b> | <b>100.0%</b> | <b>0.27 [0.18, 0.41]</b> | Heterogeneity: Not applicable<br>Test for overall effect: Z = 6.33 (P < 0.00001) |  |  |  |  |  |  | Test for subgroup differences: Chi <sup>2</sup> = 9.99, df = 3 (P = 0.02), I <sup>2</sup> = 70.0% |  |  |  |  |  |  | ⊕⊕○○<br>LOW <sup>b,c,e</sup> | There is a significant reduction of exacerbation rates with mepolizumab compared to placebo in those patients with baseline blood eosinophil counts ≥500/uL, but not in patients with eosinophil counts <150/uL, 150 to <300/uL and 300 to <500/uL. There are statistically significant differences between subgroups. |
| Study or Subgroup                                                                                                                                                                                                                          | log[Rate Ratio]                                                                                                                                                                                                                                                                                                                                                                                                                                                                                       | SE                                                                                                                                                                                                                                                                                                                                                                                                                                                                                                                                                                                                                                                                                                                                                                                                                                                                                                                                                                                                                                                                                                                                                                                                                                                                                                                                                                                                                                                                                                                                                                                                                                                                                                                                                                                                                                                                                                                                                                                                                                                                                                                                                                                                                                                                                                                                                                                                                                                 | Mepolizumab Total | Placebo Total | Weight            | Rate Ratio IV, Fixed, 95% CI |    |                   |               |        |                              |                                                          |  |  |  |  |  |  |             |        |        |    |    |        |                   |                          |  |  |           |           |               |                          |                                                                               |  |  |  |  |  |  |                                                                 |  |  |  |  |  |  |             |         |        |    |    |        |                   |                          |  |  |           |           |               |                          |                                                                               |  |  |  |  |  |  |                                                                 |  |  |  |  |  |  |             |         |        |    |    |        |                   |                          |  |  |           |           |               |                          |                                                                               |  |  |  |  |  |  |                                                       |  |  |  |  |  |  |             |         |        |     |    |        |                   |                          |  |  |            |           |               |                          |                                                                                  |  |  |  |  |  |  |                                                                                                   |  |  |  |  |  |  |                              |                                                                                                                                                                                                                                                                                                                        |
| <b>5.6.1 Baseline blood eosinophils &lt;150 cells/μl</b>                                                                                                                                                                                   |                                                                                                                                                                                                                                                                                                                                                                                                                                                                                                       |                                                                                                                                                                                                                                                                                                                                                                                                                                                                                                                                                                                                                                                                                                                                                                                                                                                                                                                                                                                                                                                                                                                                                                                                                                                                                                                                                                                                                                                                                                                                                                                                                                                                                                                                                                                                                                                                                                                                                                                                                                                                                                                                                                                                                                                                                                                                                                                                                                                    |                   |               |                   |                              |    |                   |               |        |                              |                                                          |  |  |  |  |  |  |             |        |        |    |    |        |                   |                          |  |  |           |           |               |                          |                                                                               |  |  |  |  |  |  |                                                                 |  |  |  |  |  |  |             |         |        |    |    |        |                   |                          |  |  |           |           |               |                          |                                                                               |  |  |  |  |  |  |                                                                 |  |  |  |  |  |  |             |         |        |    |    |        |                   |                          |  |  |           |           |               |                          |                                                                               |  |  |  |  |  |  |                                                       |  |  |  |  |  |  |             |         |        |     |    |        |                   |                          |  |  |            |           |               |                          |                                                                                  |  |  |  |  |  |  |                                                                                                   |  |  |  |  |  |  |                              |                                                                                                                                                                                                                                                                                                                        |
| Ortega 2016                                                                                                                                                                                                                                | -0.478                                                                                                                                                                                                                                                                                                                                                                                                                                                                                                | 0.2688                                                                                                                                                                                                                                                                                                                                                                                                                                                                                                                                                                                                                                                                                                                                                                                                                                                                                                                                                                                                                                                                                                                                                                                                                                                                                                                                                                                                                                                                                                                                                                                                                                                                                                                                                                                                                                                                                                                                                                                                                                                                                                                                                                                                                                                                                                                                                                                                                                             | 84                | 32            | 100.0%            | 0.62 [0.37, 1.05]            |    |                   |               |        |                              |                                                          |  |  |  |  |  |  |             |        |        |    |    |        |                   |                          |  |  |           |           |               |                          |                                                                               |  |  |  |  |  |  |                                                                 |  |  |  |  |  |  |             |         |        |    |    |        |                   |                          |  |  |           |           |               |                          |                                                                               |  |  |  |  |  |  |                                                                 |  |  |  |  |  |  |             |         |        |    |    |        |                   |                          |  |  |           |           |               |                          |                                                                               |  |  |  |  |  |  |                                                       |  |  |  |  |  |  |             |         |        |     |    |        |                   |                          |  |  |            |           |               |                          |                                                                                  |  |  |  |  |  |  |                                                                                                   |  |  |  |  |  |  |                              |                                                                                                                                                                                                                                                                                                                        |
| <b>Subtotal (95% CI)</b>                                                                                                                                                                                                                   |                                                                                                                                                                                                                                                                                                                                                                                                                                                                                                       |                                                                                                                                                                                                                                                                                                                                                                                                                                                                                                                                                                                                                                                                                                                                                                                                                                                                                                                                                                                                                                                                                                                                                                                                                                                                                                                                                                                                                                                                                                                                                                                                                                                                                                                                                                                                                                                                                                                                                                                                                                                                                                                                                                                                                                                                                                                                                                                                                                                    | <b>84</b>         | <b>32</b>     | <b>100.0%</b>     | <b>0.62 [0.37, 1.05]</b>     |    |                   |               |        |                              |                                                          |  |  |  |  |  |  |             |        |        |    |    |        |                   |                          |  |  |           |           |               |                          |                                                                               |  |  |  |  |  |  |                                                                 |  |  |  |  |  |  |             |         |        |    |    |        |                   |                          |  |  |           |           |               |                          |                                                                               |  |  |  |  |  |  |                                                                 |  |  |  |  |  |  |             |         |        |    |    |        |                   |                          |  |  |           |           |               |                          |                                                                               |  |  |  |  |  |  |                                                       |  |  |  |  |  |  |             |         |        |     |    |        |                   |                          |  |  |            |           |               |                          |                                                                                  |  |  |  |  |  |  |                                                                                                   |  |  |  |  |  |  |                              |                                                                                                                                                                                                                                                                                                                        |
| Heterogeneity: Not applicable<br>Test for overall effect: Z = 1.78 (P = 0.08)                                                                                                                                                              |                                                                                                                                                                                                                                                                                                                                                                                                                                                                                                       |                                                                                                                                                                                                                                                                                                                                                                                                                                                                                                                                                                                                                                                                                                                                                                                                                                                                                                                                                                                                                                                                                                                                                                                                                                                                                                                                                                                                                                                                                                                                                                                                                                                                                                                                                                                                                                                                                                                                                                                                                                                                                                                                                                                                                                                                                                                                                                                                                                                    |                   |               |                   |                              |    |                   |               |        |                              |                                                          |  |  |  |  |  |  |             |        |        |    |    |        |                   |                          |  |  |           |           |               |                          |                                                                               |  |  |  |  |  |  |                                                                 |  |  |  |  |  |  |             |         |        |    |    |        |                   |                          |  |  |           |           |               |                          |                                                                               |  |  |  |  |  |  |                                                                 |  |  |  |  |  |  |             |         |        |    |    |        |                   |                          |  |  |           |           |               |                          |                                                                               |  |  |  |  |  |  |                                                       |  |  |  |  |  |  |             |         |        |     |    |        |                   |                          |  |  |            |           |               |                          |                                                                                  |  |  |  |  |  |  |                                                                                                   |  |  |  |  |  |  |                              |                                                                                                                                                                                                                                                                                                                        |
| <b>5.6.2 Baseline blood eosinophils 150 to &lt;300 cells/μl</b>                                                                                                                                                                            |                                                                                                                                                                                                                                                                                                                                                                                                                                                                                                       |                                                                                                                                                                                                                                                                                                                                                                                                                                                                                                                                                                                                                                                                                                                                                                                                                                                                                                                                                                                                                                                                                                                                                                                                                                                                                                                                                                                                                                                                                                                                                                                                                                                                                                                                                                                                                                                                                                                                                                                                                                                                                                                                                                                                                                                                                                                                                                                                                                                    |                   |               |                   |                              |    |                   |               |        |                              |                                                          |  |  |  |  |  |  |             |        |        |    |    |        |                   |                          |  |  |           |           |               |                          |                                                                               |  |  |  |  |  |  |                                                                 |  |  |  |  |  |  |             |         |        |    |    |        |                   |                          |  |  |           |           |               |                          |                                                                               |  |  |  |  |  |  |                                                                 |  |  |  |  |  |  |             |         |        |    |    |        |                   |                          |  |  |           |           |               |                          |                                                                               |  |  |  |  |  |  |                                                       |  |  |  |  |  |  |             |         |        |     |    |        |                   |                          |  |  |            |           |               |                          |                                                                                  |  |  |  |  |  |  |                                                                                                   |  |  |  |  |  |  |                              |                                                                                                                                                                                                                                                                                                                        |
| Ortega 2016                                                                                                                                                                                                                                | -0.4463                                                                                                                                                                                                                                                                                                                                                                                                                                                                                               | 0.3034                                                                                                                                                                                                                                                                                                                                                                                                                                                                                                                                                                                                                                                                                                                                                                                                                                                                                                                                                                                                                                                                                                                                                                                                                                                                                                                                                                                                                                                                                                                                                                                                                                                                                                                                                                                                                                                                                                                                                                                                                                                                                                                                                                                                                                                                                                                                                                                                                                             | 94                | 51            | 100.0%            | 0.64 [0.35, 1.16]            |    |                   |               |        |                              |                                                          |  |  |  |  |  |  |             |        |        |    |    |        |                   |                          |  |  |           |           |               |                          |                                                                               |  |  |  |  |  |  |                                                                 |  |  |  |  |  |  |             |         |        |    |    |        |                   |                          |  |  |           |           |               |                          |                                                                               |  |  |  |  |  |  |                                                                 |  |  |  |  |  |  |             |         |        |    |    |        |                   |                          |  |  |           |           |               |                          |                                                                               |  |  |  |  |  |  |                                                       |  |  |  |  |  |  |             |         |        |     |    |        |                   |                          |  |  |            |           |               |                          |                                                                                  |  |  |  |  |  |  |                                                                                                   |  |  |  |  |  |  |                              |                                                                                                                                                                                                                                                                                                                        |
| <b>Subtotal (95% CI)</b>                                                                                                                                                                                                                   |                                                                                                                                                                                                                                                                                                                                                                                                                                                                                                       |                                                                                                                                                                                                                                                                                                                                                                                                                                                                                                                                                                                                                                                                                                                                                                                                                                                                                                                                                                                                                                                                                                                                                                                                                                                                                                                                                                                                                                                                                                                                                                                                                                                                                                                                                                                                                                                                                                                                                                                                                                                                                                                                                                                                                                                                                                                                                                                                                                                    | <b>94</b>         | <b>51</b>     | <b>100.0%</b>     | <b>0.64 [0.35, 1.16]</b>     |    |                   |               |        |                              |                                                          |  |  |  |  |  |  |             |        |        |    |    |        |                   |                          |  |  |           |           |               |                          |                                                                               |  |  |  |  |  |  |                                                                 |  |  |  |  |  |  |             |         |        |    |    |        |                   |                          |  |  |           |           |               |                          |                                                                               |  |  |  |  |  |  |                                                                 |  |  |  |  |  |  |             |         |        |    |    |        |                   |                          |  |  |           |           |               |                          |                                                                               |  |  |  |  |  |  |                                                       |  |  |  |  |  |  |             |         |        |     |    |        |                   |                          |  |  |            |           |               |                          |                                                                                  |  |  |  |  |  |  |                                                                                                   |  |  |  |  |  |  |                              |                                                                                                                                                                                                                                                                                                                        |
| Heterogeneity: Not applicable<br>Test for overall effect: Z = 1.47 (P = 0.14)                                                                                                                                                              |                                                                                                                                                                                                                                                                                                                                                                                                                                                                                                       |                                                                                                                                                                                                                                                                                                                                                                                                                                                                                                                                                                                                                                                                                                                                                                                                                                                                                                                                                                                                                                                                                                                                                                                                                                                                                                                                                                                                                                                                                                                                                                                                                                                                                                                                                                                                                                                                                                                                                                                                                                                                                                                                                                                                                                                                                                                                                                                                                                                    |                   |               |                   |                              |    |                   |               |        |                              |                                                          |  |  |  |  |  |  |             |        |        |    |    |        |                   |                          |  |  |           |           |               |                          |                                                                               |  |  |  |  |  |  |                                                                 |  |  |  |  |  |  |             |         |        |    |    |        |                   |                          |  |  |           |           |               |                          |                                                                               |  |  |  |  |  |  |                                                                 |  |  |  |  |  |  |             |         |        |    |    |        |                   |                          |  |  |           |           |               |                          |                                                                               |  |  |  |  |  |  |                                                       |  |  |  |  |  |  |             |         |        |     |    |        |                   |                          |  |  |            |           |               |                          |                                                                                  |  |  |  |  |  |  |                                                                                                   |  |  |  |  |  |  |                              |                                                                                                                                                                                                                                                                                                                        |
| <b>5.6.3 Baseline blood eosinophils 300 to &lt;500 cells/μl</b>                                                                                                                                                                            |                                                                                                                                                                                                                                                                                                                                                                                                                                                                                                       |                                                                                                                                                                                                                                                                                                                                                                                                                                                                                                                                                                                                                                                                                                                                                                                                                                                                                                                                                                                                                                                                                                                                                                                                                                                                                                                                                                                                                                                                                                                                                                                                                                                                                                                                                                                                                                                                                                                                                                                                                                                                                                                                                                                                                                                                                                                                                                                                                                                    |                   |               |                   |                              |    |                   |               |        |                              |                                                          |  |  |  |  |  |  |             |        |        |    |    |        |                   |                          |  |  |           |           |               |                          |                                                                               |  |  |  |  |  |  |                                                                 |  |  |  |  |  |  |             |         |        |    |    |        |                   |                          |  |  |           |           |               |                          |                                                                               |  |  |  |  |  |  |                                                                 |  |  |  |  |  |  |             |         |        |    |    |        |                   |                          |  |  |           |           |               |                          |                                                                               |  |  |  |  |  |  |                                                       |  |  |  |  |  |  |             |         |        |     |    |        |                   |                          |  |  |            |           |               |                          |                                                                                  |  |  |  |  |  |  |                                                                                                   |  |  |  |  |  |  |                              |                                                                                                                                                                                                                                                                                                                        |
| Ortega 2016                                                                                                                                                                                                                                | -0.4943                                                                                                                                                                                                                                                                                                                                                                                                                                                                                               | 0.2867                                                                                                                                                                                                                                                                                                                                                                                                                                                                                                                                                                                                                                                                                                                                                                                                                                                                                                                                                                                                                                                                                                                                                                                                                                                                                                                                                                                                                                                                                                                                                                                                                                                                                                                                                                                                                                                                                                                                                                                                                                                                                                                                                                                                                                                                                                                                                                                                                                             | 78                | 40            | 100.0%            | 0.61 [0.35, 1.07]            |    |                   |               |        |                              |                                                          |  |  |  |  |  |  |             |        |        |    |    |        |                   |                          |  |  |           |           |               |                          |                                                                               |  |  |  |  |  |  |                                                                 |  |  |  |  |  |  |             |         |        |    |    |        |                   |                          |  |  |           |           |               |                          |                                                                               |  |  |  |  |  |  |                                                                 |  |  |  |  |  |  |             |         |        |    |    |        |                   |                          |  |  |           |           |               |                          |                                                                               |  |  |  |  |  |  |                                                       |  |  |  |  |  |  |             |         |        |     |    |        |                   |                          |  |  |            |           |               |                          |                                                                                  |  |  |  |  |  |  |                                                                                                   |  |  |  |  |  |  |                              |                                                                                                                                                                                                                                                                                                                        |
| <b>Subtotal (95% CI)</b>                                                                                                                                                                                                                   |                                                                                                                                                                                                                                                                                                                                                                                                                                                                                                       |                                                                                                                                                                                                                                                                                                                                                                                                                                                                                                                                                                                                                                                                                                                                                                                                                                                                                                                                                                                                                                                                                                                                                                                                                                                                                                                                                                                                                                                                                                                                                                                                                                                                                                                                                                                                                                                                                                                                                                                                                                                                                                                                                                                                                                                                                                                                                                                                                                                    | <b>78</b>         | <b>40</b>     | <b>100.0%</b>     | <b>0.61 [0.35, 1.07]</b>     |    |                   |               |        |                              |                                                          |  |  |  |  |  |  |             |        |        |    |    |        |                   |                          |  |  |           |           |               |                          |                                                                               |  |  |  |  |  |  |                                                                 |  |  |  |  |  |  |             |         |        |    |    |        |                   |                          |  |  |           |           |               |                          |                                                                               |  |  |  |  |  |  |                                                                 |  |  |  |  |  |  |             |         |        |    |    |        |                   |                          |  |  |           |           |               |                          |                                                                               |  |  |  |  |  |  |                                                       |  |  |  |  |  |  |             |         |        |     |    |        |                   |                          |  |  |            |           |               |                          |                                                                                  |  |  |  |  |  |  |                                                                                                   |  |  |  |  |  |  |                              |                                                                                                                                                                                                                                                                                                                        |
| Heterogeneity: Not applicable<br>Test for overall effect: Z = 1.72 (P = 0.08)                                                                                                                                                              |                                                                                                                                                                                                                                                                                                                                                                                                                                                                                                       |                                                                                                                                                                                                                                                                                                                                                                                                                                                                                                                                                                                                                                                                                                                                                                                                                                                                                                                                                                                                                                                                                                                                                                                                                                                                                                                                                                                                                                                                                                                                                                                                                                                                                                                                                                                                                                                                                                                                                                                                                                                                                                                                                                                                                                                                                                                                                                                                                                                    |                   |               |                   |                              |    |                   |               |        |                              |                                                          |  |  |  |  |  |  |             |        |        |    |    |        |                   |                          |  |  |           |           |               |                          |                                                                               |  |  |  |  |  |  |                                                                 |  |  |  |  |  |  |             |         |        |    |    |        |                   |                          |  |  |           |           |               |                          |                                                                               |  |  |  |  |  |  |                                                                 |  |  |  |  |  |  |             |         |        |    |    |        |                   |                          |  |  |           |           |               |                          |                                                                               |  |  |  |  |  |  |                                                       |  |  |  |  |  |  |             |         |        |     |    |        |                   |                          |  |  |            |           |               |                          |                                                                                  |  |  |  |  |  |  |                                                                                                   |  |  |  |  |  |  |                              |                                                                                                                                                                                                                                                                                                                        |
| <b>5.6.4 Baseline blood eosinophils ≥500 cells/μl</b>                                                                                                                                                                                      |                                                                                                                                                                                                                                                                                                                                                                                                                                                                                                       |                                                                                                                                                                                                                                                                                                                                                                                                                                                                                                                                                                                                                                                                                                                                                                                                                                                                                                                                                                                                                                                                                                                                                                                                                                                                                                                                                                                                                                                                                                                                                                                                                                                                                                                                                                                                                                                                                                                                                                                                                                                                                                                                                                                                                                                                                                                                                                                                                                                    |                   |               |                   |                              |    |                   |               |        |                              |                                                          |  |  |  |  |  |  |             |        |        |    |    |        |                   |                          |  |  |           |           |               |                          |                                                                               |  |  |  |  |  |  |                                                                 |  |  |  |  |  |  |             |         |        |    |    |        |                   |                          |  |  |           |           |               |                          |                                                                               |  |  |  |  |  |  |                                                                 |  |  |  |  |  |  |             |         |        |    |    |        |                   |                          |  |  |           |           |               |                          |                                                                               |  |  |  |  |  |  |                                                       |  |  |  |  |  |  |             |         |        |     |    |        |                   |                          |  |  |            |           |               |                          |                                                                                  |  |  |  |  |  |  |                                                                                                   |  |  |  |  |  |  |                              |                                                                                                                                                                                                                                                                                                                        |
| Ortega 2016                                                                                                                                                                                                                                | -1.3093                                                                                                                                                                                                                                                                                                                                                                                                                                                                                               | 0.2069                                                                                                                                                                                                                                                                                                                                                                                                                                                                                                                                                                                                                                                                                                                                                                                                                                                                                                                                                                                                                                                                                                                                                                                                                                                                                                                                                                                                                                                                                                                                                                                                                                                                                                                                                                                                                                                                                                                                                                                                                                                                                                                                                                                                                                                                                                                                                                                                                                             | 124               | 66            | 100.0%            | 0.27 [0.18, 0.41]            |    |                   |               |        |                              |                                                          |  |  |  |  |  |  |             |        |        |    |    |        |                   |                          |  |  |           |           |               |                          |                                                                               |  |  |  |  |  |  |                                                                 |  |  |  |  |  |  |             |         |        |    |    |        |                   |                          |  |  |           |           |               |                          |                                                                               |  |  |  |  |  |  |                                                                 |  |  |  |  |  |  |             |         |        |    |    |        |                   |                          |  |  |           |           |               |                          |                                                                               |  |  |  |  |  |  |                                                       |  |  |  |  |  |  |             |         |        |     |    |        |                   |                          |  |  |            |           |               |                          |                                                                                  |  |  |  |  |  |  |                                                                                                   |  |  |  |  |  |  |                              |                                                                                                                                                                                                                                                                                                                        |
| <b>Subtotal (95% CI)</b>                                                                                                                                                                                                                   |                                                                                                                                                                                                                                                                                                                                                                                                                                                                                                       |                                                                                                                                                                                                                                                                                                                                                                                                                                                                                                                                                                                                                                                                                                                                                                                                                                                                                                                                                                                                                                                                                                                                                                                                                                                                                                                                                                                                                                                                                                                                                                                                                                                                                                                                                                                                                                                                                                                                                                                                                                                                                                                                                                                                                                                                                                                                                                                                                                                    | <b>124</b>        | <b>66</b>     | <b>100.0%</b>     | <b>0.27 [0.18, 0.41]</b>     |    |                   |               |        |                              |                                                          |  |  |  |  |  |  |             |        |        |    |    |        |                   |                          |  |  |           |           |               |                          |                                                                               |  |  |  |  |  |  |                                                                 |  |  |  |  |  |  |             |         |        |    |    |        |                   |                          |  |  |           |           |               |                          |                                                                               |  |  |  |  |  |  |                                                                 |  |  |  |  |  |  |             |         |        |    |    |        |                   |                          |  |  |           |           |               |                          |                                                                               |  |  |  |  |  |  |                                                       |  |  |  |  |  |  |             |         |        |     |    |        |                   |                          |  |  |            |           |               |                          |                                                                                  |  |  |  |  |  |  |                                                                                                   |  |  |  |  |  |  |                              |                                                                                                                                                                                                                                                                                                                        |
| Heterogeneity: Not applicable<br>Test for overall effect: Z = 6.33 (P < 0.00001)                                                                                                                                                           |                                                                                                                                                                                                                                                                                                                                                                                                                                                                                                       |                                                                                                                                                                                                                                                                                                                                                                                                                                                                                                                                                                                                                                                                                                                                                                                                                                                                                                                                                                                                                                                                                                                                                                                                                                                                                                                                                                                                                                                                                                                                                                                                                                                                                                                                                                                                                                                                                                                                                                                                                                                                                                                                                                                                                                                                                                                                                                                                                                                    |                   |               |                   |                              |    |                   |               |        |                              |                                                          |  |  |  |  |  |  |             |        |        |    |    |        |                   |                          |  |  |           |           |               |                          |                                                                               |  |  |  |  |  |  |                                                                 |  |  |  |  |  |  |             |         |        |    |    |        |                   |                          |  |  |           |           |               |                          |                                                                               |  |  |  |  |  |  |                                                                 |  |  |  |  |  |  |             |         |        |    |    |        |                   |                          |  |  |           |           |               |                          |                                                                               |  |  |  |  |  |  |                                                       |  |  |  |  |  |  |             |         |        |     |    |        |                   |                          |  |  |            |           |               |                          |                                                                                  |  |  |  |  |  |  |                                                                                                   |  |  |  |  |  |  |                              |                                                                                                                                                                                                                                                                                                                        |
| Test for subgroup differences: Chi <sup>2</sup> = 9.99, df = 3 (P = 0.02), I <sup>2</sup> = 70.0%                                                                                                                                          |                                                                                                                                                                                                                                                                                                                                                                                                                                                                                                       |                                                                                                                                                                                                                                                                                                                                                                                                                                                                                                                                                                                                                                                                                                                                                                                                                                                                                                                                                                                                                                                                                                                                                                                                                                                                                                                                                                                                                                                                                                                                                                                                                                                                                                                                                                                                                                                                                                                                                                                                                                                                                                                                                                                                                                                                                                                                                                                                                                                    |                   |               |                   |                              |    |                   |               |        |                              |                                                          |  |  |  |  |  |  |             |        |        |    |    |        |                   |                          |  |  |           |           |               |                          |                                                                               |  |  |  |  |  |  |                                                                 |  |  |  |  |  |  |             |         |        |    |    |        |                   |                          |  |  |           |           |               |                          |                                                                               |  |  |  |  |  |  |                                                                 |  |  |  |  |  |  |             |         |        |    |    |        |                   |                          |  |  |           |           |               |                          |                                                                               |  |  |  |  |  |  |                                                       |  |  |  |  |  |  |             |         |        |     |    |        |                   |                          |  |  |            |           |               |                          |                                                                                  |  |  |  |  |  |  |                                                                                                   |  |  |  |  |  |  |                              |                                                                                                                                                                                                                                                                                                                        |

CI: Confidence interval; RR: Risk ratio; MD: Mean difference; OR: Odds ratio

#### GRADE Working Group grades of evidence

**High certainty:** We are very confident that the true effect lies close to that of the estimate of the effect

**Moderate certainty:** We are moderately confident in the effect estimate: The true effect is likely to be close to the estimate of the effect, but there is a possibility that it is substantially different

**Low certainty:** Our confidence in the effect estimate is limited: The true effect may be substantially different from the estimate of the effect

**Very low certainty:** We have very little confidence in the effect estimate: The true effect is likely to be substantially different from the estimate of effect

## Explanations

a. The participants included in these analyses have been considered to represent a population of severe asthmatics as defined by the ERS/ATS Guidelines on Severe Asthma 2014<sup>3</sup>.

b. Potential risk of bias associated with selective outcome reporting bias (non-predefined post-hoc analyses).

- c. The inclusion criteria for participants 12-17 years of age required treatment with inhaled corticosteroids at a lower dose than that recommended by the ERS/ATS Guidelines on Severe Asthma (2014)<sup>3</sup>. The proportion of included participants 12-17 years of age was not specified. However we have assumed the proportion of included participants 12-17 years was small relative to the whole study population and therefore we have not downgraded for indirectness.
- d. The measure of effect was not clearly specified in Ortega 2016, but we have assumed it was presented as mean difference between change-from-baseline measures.
- e. Mepolizumab doses (100 mg SC and 75 mg IV) were combined for the analysis, as reported by Ortega 2016.
- f. The ends of the 95% confidence interval of at least one subgroup include appreciable benefit and no benefit and could lead to different clinical decisions.

## References

1. Chupp GL, Bradford ES, Albers FC, et al. Efficacy of mepolizumab add-on therapy on health-related quality of life and markers of asthma control in severe eosinophilic asthma (MUSCA): a randomised, double-blind, placebo-controlled, parallel-group, multicentre, phase 3b trial. *Lancet Respir Med* 2017; 5: 390–400.
2. Ortega HG, Yancey SW, Mayer B, et al. Severe eosinophilic asthma treated with mepolizumab stratified by baseline eosinophil thresholds: a secondary analysis of the DREAM and MENSA studies. *Lancet Respir Med* 2016; 4: 549-556.
3. Chung KF, Wenzel SE, Brozek JL, et al. International ERS/ATS guidelines on definition, evaluation and treatment of severe asthma. *Eur Respir J* 2014; 43: 343-373.
4. Santanello NC, Zhang J, Seidenberg B, Reiss TF, Barber BL. What are minimal important changes for asthma measures in a clinical trial? *Eur Respir J* 1999; 14: 23-27.

**GRADE Evidence Profile: BENRALIZUMAB (according to baseline number of blood eosinophils)**

| Outcome<br>№ of participants<br>(studies)                                                                                                                                                                                                                                                                      | Relative effect<br>(95% CI)                                                                                                                                                                                                                                                                                    | Anticipated absolute effects (95% CI)                                                                                                                                                                                                                                                                                                                                                                                                                                                                                                                                                                                                                                                                                                                                                                                                                                                                                                                                                                                                                                                                                                                                                                                                                                                                                                                                                                                                                                                                                                                                                                                                                                                                                                                                                                                                                                                                                                                                                                                                       |                    |               | Certainty         | What happens                       |    |                    |               |        |                                    |                                                          |  |  |  |  |  |  |               |       |        |     |     |        |                     |                          |       |        |          |           |               |                           |                                                                               |       |        |     |     |       |                     |                                                       |  |  |            |            |               |                            |                                                                                                                      |     |       |     |     |       |                   |                                                       |      |       |    |    |      |                    |                 |       |        |     |     |       |                      |                          |       |        |            |            |               |                          |                                                                                                                       |       |        |     |     |       |                      |                                                                        |  |  |            |            |               |                             |                                                                                                                       |                                                                                                                                                                                                                                                                          |  |  |  |  |  |                                                                        |  |  |  |  |  |  |                                 |                                                                                                                                                                                                                                                                   |
|----------------------------------------------------------------------------------------------------------------------------------------------------------------------------------------------------------------------------------------------------------------------------------------------------------------|----------------------------------------------------------------------------------------------------------------------------------------------------------------------------------------------------------------------------------------------------------------------------------------------------------------|---------------------------------------------------------------------------------------------------------------------------------------------------------------------------------------------------------------------------------------------------------------------------------------------------------------------------------------------------------------------------------------------------------------------------------------------------------------------------------------------------------------------------------------------------------------------------------------------------------------------------------------------------------------------------------------------------------------------------------------------------------------------------------------------------------------------------------------------------------------------------------------------------------------------------------------------------------------------------------------------------------------------------------------------------------------------------------------------------------------------------------------------------------------------------------------------------------------------------------------------------------------------------------------------------------------------------------------------------------------------------------------------------------------------------------------------------------------------------------------------------------------------------------------------------------------------------------------------------------------------------------------------------------------------------------------------------------------------------------------------------------------------------------------------------------------------------------------------------------------------------------------------------------------------------------------------------------------------------------------------------------------------------------------------|--------------------|---------------|-------------------|------------------------------------|----|--------------------|---------------|--------|------------------------------------|----------------------------------------------------------|--|--|--|--|--|--|---------------|-------|--------|-----|-----|--------|---------------------|--------------------------|-------|--------|----------|-----------|---------------|---------------------------|-------------------------------------------------------------------------------|-------|--------|-----|-----|-------|---------------------|-------------------------------------------------------|--|--|------------|------------|---------------|----------------------------|----------------------------------------------------------------------------------------------------------------------|-----|-------|-----|-----|-------|-------------------|-------------------------------------------------------|------|-------|----|----|------|--------------------|-----------------|-------|--------|-----|-----|-------|----------------------|--------------------------|-------|--------|------------|------------|---------------|--------------------------|-----------------------------------------------------------------------------------------------------------------------|-------|--------|-----|-----|-------|----------------------|------------------------------------------------------------------------|--|--|------------|------------|---------------|-----------------------------|-----------------------------------------------------------------------------------------------------------------------|--------------------------------------------------------------------------------------------------------------------------------------------------------------------------------------------------------------------------------------------------------------------------|--|--|--|--|--|------------------------------------------------------------------------|--|--|--|--|--|--|---------------------------------|-------------------------------------------------------------------------------------------------------------------------------------------------------------------------------------------------------------------------------------------------------------------|
|                                                                                                                                                                                                                                                                                                                |                                                                                                                                                                                                                                                                                                                |                                                                                                                                                                                                                                                                                                                                                                                                                                                                                                                                                                                                                                                                                                                                                                                                                                                                                                                                                                                                                                                                                                                                                                                                                                                                                                                                                                                                                                                                                                                                                                                                                                                                                                                                                                                                                                                                                                                                                                                                                                             |                    | Difference    |                   |                                    |    |                    |               |        |                                    |                                                          |  |  |  |  |  |  |               |       |        |     |     |        |                     |                          |       |        |          |           |               |                           |                                                                               |       |        |     |     |       |                     |                                                       |  |  |            |            |               |                            |                                                                                                                      |     |       |     |     |       |                   |                                                       |      |       |    |    |      |                    |                 |       |        |     |     |       |                      |                          |       |        |            |            |               |                          |                                                                                                                       |       |        |     |     |       |                      |                                                                        |  |  |            |            |               |                             |                                                                                                                       |                                                                                                                                                                                                                                                                          |  |  |  |  |  |                                                                        |  |  |  |  |  |  |                                 |                                                                                                                                                                                                                                                                   |
| <b>Quality of life (change from baseline)</b><br>assessed with: Asthma Quality of Life Questionnaire (AQLQ)<br>follow up: range 28 weeks to 56 weeks;<br>Scale from: 1 to 7; higher values indicate better quality of life; MCID 0.5)<br>№ of participants: 1194<br>(3 RCTs) 1,2,3<br><br>Importance: CRITICAL | Mean change from baseline in AQLQ score in patients treated with benralizumab compared to placebo were:<br>Eosinophil <300/µL: Mean difference (95% CI) = 0.85 (-0.39 to 2.09), n=55 ; Eosinophil ≥300/µL: Mean difference (95% CI) = 0.29 (0.15 to 0.43), n=1047 . Test for subgroup differences, p=0.38.     | <table border="1"> <thead> <tr> <th>Study or Subgroup</th> <th>Mean Difference</th> <th>SE</th> <th>Benralizumab Total</th> <th>Placebo Total</th> <th>Weight</th> <th>Mean Difference IV, Random, 95% CI</th> </tr> </thead> <tbody> <tr> <td colspan="7"><b>6.1.1 Baseline blood eosinophils &lt;300 cells/µL</b></td> </tr> <tr> <td>Castro 2014</td> <td>0.85</td> <td>0.635</td> <td>4</td> <td>51</td> <td>100.0%</td> <td>0.85 [-0.39, 2.09]</td> </tr> <tr> <td><b>Subtotal (95% CI)</b></td> <td></td> <td></td> <td><b>4</b></td> <td><b>51</b></td> <td><b>100.0%</b></td> <td><b>0.85 [-0.39, 2.09]</b></td> </tr> <tr> <td colspan="7">Heterogeneity: Not applicable<br/>Test for overall effect: Z = 1.34 (P = 0.18)</td> </tr> <tr> <td colspan="7"><b>6.1.2 Baseline blood eosinophils ≥300 cells/µL</b></td> </tr> <tr> <td>Bleecker 2016</td> <td>0.3</td> <td>0.102</td> <td>252</td> <td>254</td> <td>49.3%</td> <td>0.30 [0.10, 0.50]</td> </tr> <tr> <td>Castro 2014</td> <td>0.44</td> <td>0.293</td> <td>34</td> <td>37</td> <td>6.0%</td> <td>0.44 [-0.13, 1.01]</td> </tr> <tr> <td>FitzGerald 2016</td> <td>0.25</td> <td>0.1071</td> <td>230</td> <td>240</td> <td>44.7%</td> <td>0.25 [0.04, 0.46]</td> </tr> <tr> <td><b>Subtotal (95% CI)</b></td> <td></td> <td></td> <td><b>516</b></td> <td><b>531</b></td> <td><b>100.0%</b></td> <td><b>0.29 [0.15, 0.43]</b></td> </tr> <tr> <td colspan="7">Heterogeneity: Tau² = 0.00; Chi² = 0.41, df = 2 (P = 0.82); I² = 0%<br/>Test for overall effect: Z = 3.99 (P &lt; 0.0001)</td> </tr> <tr> <td colspan="7">Test for subgroup differences: Chi² = 0.78, df = 1 (P = 0.38), I² = 0%</td> </tr> </tbody> </table>                                                                                                                                                                                                                                                                                                                                             |                    |               | Study or Subgroup | Mean Difference                    | SE | Benralizumab Total | Placebo Total | Weight | Mean Difference IV, Random, 95% CI | <b>6.1.1 Baseline blood eosinophils &lt;300 cells/µL</b> |  |  |  |  |  |  | Castro 2014   | 0.85  | 0.635  | 4   | 51  | 100.0% | 0.85 [-0.39, 2.09]  | <b>Subtotal (95% CI)</b> |       |        | <b>4</b> | <b>51</b> | <b>100.0%</b> | <b>0.85 [-0.39, 2.09]</b> | Heterogeneity: Not applicable<br>Test for overall effect: Z = 1.34 (P = 0.18) |       |        |     |     |       |                     | <b>6.1.2 Baseline blood eosinophils ≥300 cells/µL</b> |  |  |            |            |               |                            | Bleecker 2016                                                                                                        | 0.3 | 0.102 | 252 | 254 | 49.3% | 0.30 [0.10, 0.50] | Castro 2014                                           | 0.44 | 0.293 | 34 | 37 | 6.0% | 0.44 [-0.13, 1.01] | FitzGerald 2016 | 0.25  | 0.1071 | 230 | 240 | 44.7% | 0.25 [0.04, 0.46]    | <b>Subtotal (95% CI)</b> |       |        | <b>516</b> | <b>531</b> | <b>100.0%</b> | <b>0.29 [0.15, 0.43]</b> | Heterogeneity: Tau² = 0.00; Chi² = 0.41, df = 2 (P = 0.82); I² = 0%<br>Test for overall effect: Z = 3.99 (P < 0.0001) |       |        |     |     |       |                      | Test for subgroup differences: Chi² = 0.78, df = 1 (P = 0.38), I² = 0% |  |  |            |            |               |                             | ⊕○○○<br>○<br>VERY LOW <sup>a,b,c</sup>                                                                                | There are significant improvements in asthma quality of life assessed by the AQLQ with benralizumab compared to placebo in patients with baseline blood eosinophil counts ≥300/µL but not <300/µL. There are no statistically significant differences between subgroups. |  |  |  |  |  |                                                                        |  |  |  |  |  |  |                                 |                                                                                                                                                                                                                                                                   |
| Study or Subgroup                                                                                                                                                                                                                                                                                              | Mean Difference                                                                                                                                                                                                                                                                                                | SE                                                                                                                                                                                                                                                                                                                                                                                                                                                                                                                                                                                                                                                                                                                                                                                                                                                                                                                                                                                                                                                                                                                                                                                                                                                                                                                                                                                                                                                                                                                                                                                                                                                                                                                                                                                                                                                                                                                                                                                                                                          | Benralizumab Total | Placebo Total | Weight            | Mean Difference IV, Random, 95% CI |    |                    |               |        |                                    |                                                          |  |  |  |  |  |  |               |       |        |     |     |        |                     |                          |       |        |          |           |               |                           |                                                                               |       |        |     |     |       |                     |                                                       |  |  |            |            |               |                            |                                                                                                                      |     |       |     |     |       |                   |                                                       |      |       |    |    |      |                    |                 |       |        |     |     |       |                      |                          |       |        |            |            |               |                          |                                                                                                                       |       |        |     |     |       |                      |                                                                        |  |  |            |            |               |                             |                                                                                                                       |                                                                                                                                                                                                                                                                          |  |  |  |  |  |                                                                        |  |  |  |  |  |  |                                 |                                                                                                                                                                                                                                                                   |
| <b>6.1.1 Baseline blood eosinophils &lt;300 cells/µL</b>                                                                                                                                                                                                                                                       |                                                                                                                                                                                                                                                                                                                |                                                                                                                                                                                                                                                                                                                                                                                                                                                                                                                                                                                                                                                                                                                                                                                                                                                                                                                                                                                                                                                                                                                                                                                                                                                                                                                                                                                                                                                                                                                                                                                                                                                                                                                                                                                                                                                                                                                                                                                                                                             |                    |               |                   |                                    |    |                    |               |        |                                    |                                                          |  |  |  |  |  |  |               |       |        |     |     |        |                     |                          |       |        |          |           |               |                           |                                                                               |       |        |     |     |       |                     |                                                       |  |  |            |            |               |                            |                                                                                                                      |     |       |     |     |       |                   |                                                       |      |       |    |    |      |                    |                 |       |        |     |     |       |                      |                          |       |        |            |            |               |                          |                                                                                                                       |       |        |     |     |       |                      |                                                                        |  |  |            |            |               |                             |                                                                                                                       |                                                                                                                                                                                                                                                                          |  |  |  |  |  |                                                                        |  |  |  |  |  |  |                                 |                                                                                                                                                                                                                                                                   |
| Castro 2014                                                                                                                                                                                                                                                                                                    | 0.85                                                                                                                                                                                                                                                                                                           | 0.635                                                                                                                                                                                                                                                                                                                                                                                                                                                                                                                                                                                                                                                                                                                                                                                                                                                                                                                                                                                                                                                                                                                                                                                                                                                                                                                                                                                                                                                                                                                                                                                                                                                                                                                                                                                                                                                                                                                                                                                                                                       | 4                  | 51            | 100.0%            | 0.85 [-0.39, 2.09]                 |    |                    |               |        |                                    |                                                          |  |  |  |  |  |  |               |       |        |     |     |        |                     |                          |       |        |          |           |               |                           |                                                                               |       |        |     |     |       |                     |                                                       |  |  |            |            |               |                            |                                                                                                                      |     |       |     |     |       |                   |                                                       |      |       |    |    |      |                    |                 |       |        |     |     |       |                      |                          |       |        |            |            |               |                          |                                                                                                                       |       |        |     |     |       |                      |                                                                        |  |  |            |            |               |                             |                                                                                                                       |                                                                                                                                                                                                                                                                          |  |  |  |  |  |                                                                        |  |  |  |  |  |  |                                 |                                                                                                                                                                                                                                                                   |
| <b>Subtotal (95% CI)</b>                                                                                                                                                                                                                                                                                       |                                                                                                                                                                                                                                                                                                                |                                                                                                                                                                                                                                                                                                                                                                                                                                                                                                                                                                                                                                                                                                                                                                                                                                                                                                                                                                                                                                                                                                                                                                                                                                                                                                                                                                                                                                                                                                                                                                                                                                                                                                                                                                                                                                                                                                                                                                                                                                             | <b>4</b>           | <b>51</b>     | <b>100.0%</b>     | <b>0.85 [-0.39, 2.09]</b>          |    |                    |               |        |                                    |                                                          |  |  |  |  |  |  |               |       |        |     |     |        |                     |                          |       |        |          |           |               |                           |                                                                               |       |        |     |     |       |                     |                                                       |  |  |            |            |               |                            |                                                                                                                      |     |       |     |     |       |                   |                                                       |      |       |    |    |      |                    |                 |       |        |     |     |       |                      |                          |       |        |            |            |               |                          |                                                                                                                       |       |        |     |     |       |                      |                                                                        |  |  |            |            |               |                             |                                                                                                                       |                                                                                                                                                                                                                                                                          |  |  |  |  |  |                                                                        |  |  |  |  |  |  |                                 |                                                                                                                                                                                                                                                                   |
| Heterogeneity: Not applicable<br>Test for overall effect: Z = 1.34 (P = 0.18)                                                                                                                                                                                                                                  |                                                                                                                                                                                                                                                                                                                |                                                                                                                                                                                                                                                                                                                                                                                                                                                                                                                                                                                                                                                                                                                                                                                                                                                                                                                                                                                                                                                                                                                                                                                                                                                                                                                                                                                                                                                                                                                                                                                                                                                                                                                                                                                                                                                                                                                                                                                                                                             |                    |               |                   |                                    |    |                    |               |        |                                    |                                                          |  |  |  |  |  |  |               |       |        |     |     |        |                     |                          |       |        |          |           |               |                           |                                                                               |       |        |     |     |       |                     |                                                       |  |  |            |            |               |                            |                                                                                                                      |     |       |     |     |       |                   |                                                       |      |       |    |    |      |                    |                 |       |        |     |     |       |                      |                          |       |        |            |            |               |                          |                                                                                                                       |       |        |     |     |       |                      |                                                                        |  |  |            |            |               |                             |                                                                                                                       |                                                                                                                                                                                                                                                                          |  |  |  |  |  |                                                                        |  |  |  |  |  |  |                                 |                                                                                                                                                                                                                                                                   |
| <b>6.1.2 Baseline blood eosinophils ≥300 cells/µL</b>                                                                                                                                                                                                                                                          |                                                                                                                                                                                                                                                                                                                |                                                                                                                                                                                                                                                                                                                                                                                                                                                                                                                                                                                                                                                                                                                                                                                                                                                                                                                                                                                                                                                                                                                                                                                                                                                                                                                                                                                                                                                                                                                                                                                                                                                                                                                                                                                                                                                                                                                                                                                                                                             |                    |               |                   |                                    |    |                    |               |        |                                    |                                                          |  |  |  |  |  |  |               |       |        |     |     |        |                     |                          |       |        |          |           |               |                           |                                                                               |       |        |     |     |       |                     |                                                       |  |  |            |            |               |                            |                                                                                                                      |     |       |     |     |       |                   |                                                       |      |       |    |    |      |                    |                 |       |        |     |     |       |                      |                          |       |        |            |            |               |                          |                                                                                                                       |       |        |     |     |       |                      |                                                                        |  |  |            |            |               |                             |                                                                                                                       |                                                                                                                                                                                                                                                                          |  |  |  |  |  |                                                                        |  |  |  |  |  |  |                                 |                                                                                                                                                                                                                                                                   |
| Bleecker 2016                                                                                                                                                                                                                                                                                                  | 0.3                                                                                                                                                                                                                                                                                                            | 0.102                                                                                                                                                                                                                                                                                                                                                                                                                                                                                                                                                                                                                                                                                                                                                                                                                                                                                                                                                                                                                                                                                                                                                                                                                                                                                                                                                                                                                                                                                                                                                                                                                                                                                                                                                                                                                                                                                                                                                                                                                                       | 252                | 254           | 49.3%             | 0.30 [0.10, 0.50]                  |    |                    |               |        |                                    |                                                          |  |  |  |  |  |  |               |       |        |     |     |        |                     |                          |       |        |          |           |               |                           |                                                                               |       |        |     |     |       |                     |                                                       |  |  |            |            |               |                            |                                                                                                                      |     |       |     |     |       |                   |                                                       |      |       |    |    |      |                    |                 |       |        |     |     |       |                      |                          |       |        |            |            |               |                          |                                                                                                                       |       |        |     |     |       |                      |                                                                        |  |  |            |            |               |                             |                                                                                                                       |                                                                                                                                                                                                                                                                          |  |  |  |  |  |                                                                        |  |  |  |  |  |  |                                 |                                                                                                                                                                                                                                                                   |
| Castro 2014                                                                                                                                                                                                                                                                                                    | 0.44                                                                                                                                                                                                                                                                                                           | 0.293                                                                                                                                                                                                                                                                                                                                                                                                                                                                                                                                                                                                                                                                                                                                                                                                                                                                                                                                                                                                                                                                                                                                                                                                                                                                                                                                                                                                                                                                                                                                                                                                                                                                                                                                                                                                                                                                                                                                                                                                                                       | 34                 | 37            | 6.0%              | 0.44 [-0.13, 1.01]                 |    |                    |               |        |                                    |                                                          |  |  |  |  |  |  |               |       |        |     |     |        |                     |                          |       |        |          |           |               |                           |                                                                               |       |        |     |     |       |                     |                                                       |  |  |            |            |               |                            |                                                                                                                      |     |       |     |     |       |                   |                                                       |      |       |    |    |      |                    |                 |       |        |     |     |       |                      |                          |       |        |            |            |               |                          |                                                                                                                       |       |        |     |     |       |                      |                                                                        |  |  |            |            |               |                             |                                                                                                                       |                                                                                                                                                                                                                                                                          |  |  |  |  |  |                                                                        |  |  |  |  |  |  |                                 |                                                                                                                                                                                                                                                                   |
| FitzGerald 2016                                                                                                                                                                                                                                                                                                | 0.25                                                                                                                                                                                                                                                                                                           | 0.1071                                                                                                                                                                                                                                                                                                                                                                                                                                                                                                                                                                                                                                                                                                                                                                                                                                                                                                                                                                                                                                                                                                                                                                                                                                                                                                                                                                                                                                                                                                                                                                                                                                                                                                                                                                                                                                                                                                                                                                                                                                      | 230                | 240           | 44.7%             | 0.25 [0.04, 0.46]                  |    |                    |               |        |                                    |                                                          |  |  |  |  |  |  |               |       |        |     |     |        |                     |                          |       |        |          |           |               |                           |                                                                               |       |        |     |     |       |                     |                                                       |  |  |            |            |               |                            |                                                                                                                      |     |       |     |     |       |                   |                                                       |      |       |    |    |      |                    |                 |       |        |     |     |       |                      |                          |       |        |            |            |               |                          |                                                                                                                       |       |        |     |     |       |                      |                                                                        |  |  |            |            |               |                             |                                                                                                                       |                                                                                                                                                                                                                                                                          |  |  |  |  |  |                                                                        |  |  |  |  |  |  |                                 |                                                                                                                                                                                                                                                                   |
| <b>Subtotal (95% CI)</b>                                                                                                                                                                                                                                                                                       |                                                                                                                                                                                                                                                                                                                |                                                                                                                                                                                                                                                                                                                                                                                                                                                                                                                                                                                                                                                                                                                                                                                                                                                                                                                                                                                                                                                                                                                                                                                                                                                                                                                                                                                                                                                                                                                                                                                                                                                                                                                                                                                                                                                                                                                                                                                                                                             | <b>516</b>         | <b>531</b>    | <b>100.0%</b>     | <b>0.29 [0.15, 0.43]</b>           |    |                    |               |        |                                    |                                                          |  |  |  |  |  |  |               |       |        |     |     |        |                     |                          |       |        |          |           |               |                           |                                                                               |       |        |     |     |       |                     |                                                       |  |  |            |            |               |                            |                                                                                                                      |     |       |     |     |       |                   |                                                       |      |       |    |    |      |                    |                 |       |        |     |     |       |                      |                          |       |        |            |            |               |                          |                                                                                                                       |       |        |     |     |       |                      |                                                                        |  |  |            |            |               |                             |                                                                                                                       |                                                                                                                                                                                                                                                                          |  |  |  |  |  |                                                                        |  |  |  |  |  |  |                                 |                                                                                                                                                                                                                                                                   |
| Heterogeneity: Tau² = 0.00; Chi² = 0.41, df = 2 (P = 0.82); I² = 0%<br>Test for overall effect: Z = 3.99 (P < 0.0001)                                                                                                                                                                                          |                                                                                                                                                                                                                                                                                                                |                                                                                                                                                                                                                                                                                                                                                                                                                                                                                                                                                                                                                                                                                                                                                                                                                                                                                                                                                                                                                                                                                                                                                                                                                                                                                                                                                                                                                                                                                                                                                                                                                                                                                                                                                                                                                                                                                                                                                                                                                                             |                    |               |                   |                                    |    |                    |               |        |                                    |                                                          |  |  |  |  |  |  |               |       |        |     |     |        |                     |                          |       |        |          |           |               |                           |                                                                               |       |        |     |     |       |                     |                                                       |  |  |            |            |               |                            |                                                                                                                      |     |       |     |     |       |                   |                                                       |      |       |    |    |      |                    |                 |       |        |     |     |       |                      |                          |       |        |            |            |               |                          |                                                                                                                       |       |        |     |     |       |                      |                                                                        |  |  |            |            |               |                             |                                                                                                                       |                                                                                                                                                                                                                                                                          |  |  |  |  |  |                                                                        |  |  |  |  |  |  |                                 |                                                                                                                                                                                                                                                                   |
| Test for subgroup differences: Chi² = 0.78, df = 1 (P = 0.38), I² = 0%                                                                                                                                                                                                                                         |                                                                                                                                                                                                                                                                                                                |                                                                                                                                                                                                                                                                                                                                                                                                                                                                                                                                                                                                                                                                                                                                                                                                                                                                                                                                                                                                                                                                                                                                                                                                                                                                                                                                                                                                                                                                                                                                                                                                                                                                                                                                                                                                                                                                                                                                                                                                                                             |                    |               |                   |                                    |    |                    |               |        |                                    |                                                          |  |  |  |  |  |  |               |       |        |     |     |        |                     |                          |       |        |          |           |               |                           |                                                                               |       |        |     |     |       |                     |                                                       |  |  |            |            |               |                            |                                                                                                                      |     |       |     |     |       |                   |                                                       |      |       |    |    |      |                    |                 |       |        |     |     |       |                      |                          |       |        |            |            |               |                          |                                                                                                                       |       |        |     |     |       |                      |                                                                        |  |  |            |            |               |                             |                                                                                                                       |                                                                                                                                                                                                                                                                          |  |  |  |  |  |                                                                        |  |  |  |  |  |  |                                 |                                                                                                                                                                                                                                                                   |
| <b>Asthma control (change from baseline)</b><br>assessed with: Asthma Control Questionnaire (ACQ-6)<br>follow up: range 28 weeks to 56 weeks<br>Scale from: 0 to 6; lower values indicate better asthma control; MCID 0.5<br>№ of participants: 1236<br>(3 RCTs) 1,2,3<br><br>Importance: CRITICAL             | Mean change from baseline in ACQ-6 score in patients treated with benralizumab compared to placebo were:<br>Eosinophil <300/µL: Mean difference (95% CI) = -0.20 (-0.44 to 0.03), n=580; Eosinophil ≥300/µL: Mean difference (95% CI) = -0.28 (-0.41 to -0.15), n=1089. Test for subgroup differences, p=0.56. | <table border="1"> <thead> <tr> <th>Study or Subgroup</th> <th>Mean Difference</th> <th>SE</th> <th>Benralizumab Total</th> <th>Placebo Total</th> <th>Weight</th> <th>Mean Difference IV, Random, 95% CI</th> </tr> </thead> <tbody> <tr> <td colspan="7"><b>6.2.1 Baseline blood eosinophils &lt;300 cells/µL</b></td> </tr> <tr> <td>Bleecker 2016</td> <td>-0.22</td> <td>0.1327</td> <td>130</td> <td>138</td> <td>48.0%</td> <td>-0.22 [-0.48, 0.04]</td> </tr> <tr> <td>Castro 2014</td> <td>-1.11</td> <td>0.5985</td> <td>5</td> <td>60</td> <td>3.9%</td> <td>-1.11 [-2.28, 0.06]</td> </tr> <tr> <td>FitzGerald 2016</td> <td>-0.11</td> <td>0.1327</td> <td>125</td> <td>122</td> <td>48.0%</td> <td>-0.11 [-0.37, 0.15]</td> </tr> <tr> <td><b>Subtotal (95% CI)</b></td> <td></td> <td></td> <td><b>260</b></td> <td><b>320</b></td> <td><b>100.0%</b></td> <td><b>-0.20 [-0.44, 0.03]</b></td> </tr> <tr> <td colspan="7">Heterogeneity: Tau² = 0.01; Chi² = 2.78, df = 2 (P = 0.25); I² = 28%<br/>Test for overall effect: Z = 1.67 (P = 0.09)</td> </tr> <tr> <td colspan="7"><b>6.2.2 Baseline blood eosinophils ≥300 cells/µL</b></td> </tr> <tr> <td>Bleecker 2016</td> <td>-0.29</td> <td>0.0969</td> <td>263</td> <td>267</td> <td>46.4%</td> <td>-0.29 [-0.48, -0.10]</td> </tr> <tr> <td>Castro 2014</td> <td>-0.44</td> <td>0.2461</td> <td>35</td> <td>38</td> <td>7.2%</td> <td>-0.44 [-0.92, 0.04]</td> </tr> <tr> <td>FitzGerald 2016</td> <td>-0.25</td> <td>0.0969</td> <td>239</td> <td>247</td> <td>46.4%</td> <td>-0.25 [-0.44, -0.06]</td> </tr> <tr> <td><b>Subtotal (95% CI)</b></td> <td></td> <td></td> <td><b>537</b></td> <td><b>552</b></td> <td><b>100.0%</b></td> <td><b>-0.28 [-0.41, -0.15]</b></td> </tr> <tr> <td colspan="7">Heterogeneity: Tau² = 0.00; Chi² = 0.53, df = 2 (P = 0.77); I² = 0%<br/>Test for overall effect: Z = 4.28 (P &lt; 0.0001)</td> </tr> <tr> <td colspan="7">Test for subgroup differences: Chi² = 0.34, df = 1 (P = 0.56), I² = 0%</td> </tr> </tbody> </table> |                    |               | Study or Subgroup | Mean Difference                    | SE | Benralizumab Total | Placebo Total | Weight | Mean Difference IV, Random, 95% CI | <b>6.2.1 Baseline blood eosinophils &lt;300 cells/µL</b> |  |  |  |  |  |  | Bleecker 2016 | -0.22 | 0.1327 | 130 | 138 | 48.0%  | -0.22 [-0.48, 0.04] | Castro 2014              | -1.11 | 0.5985 | 5        | 60        | 3.9%          | -1.11 [-2.28, 0.06]       | FitzGerald 2016                                                               | -0.11 | 0.1327 | 125 | 122 | 48.0% | -0.11 [-0.37, 0.15] | <b>Subtotal (95% CI)</b>                              |  |  | <b>260</b> | <b>320</b> | <b>100.0%</b> | <b>-0.20 [-0.44, 0.03]</b> | Heterogeneity: Tau² = 0.01; Chi² = 2.78, df = 2 (P = 0.25); I² = 28%<br>Test for overall effect: Z = 1.67 (P = 0.09) |     |       |     |     |       |                   | <b>6.2.2 Baseline blood eosinophils ≥300 cells/µL</b> |      |       |    |    |      |                    | Bleecker 2016   | -0.29 | 0.0969 | 263 | 267 | 46.4% | -0.29 [-0.48, -0.10] | Castro 2014              | -0.44 | 0.2461 | 35         | 38         | 7.2%          | -0.44 [-0.92, 0.04]      | FitzGerald 2016                                                                                                       | -0.25 | 0.0969 | 239 | 247 | 46.4% | -0.25 [-0.44, -0.06] | <b>Subtotal (95% CI)</b>                                               |  |  | <b>537</b> | <b>552</b> | <b>100.0%</b> | <b>-0.28 [-0.41, -0.15]</b> | Heterogeneity: Tau² = 0.00; Chi² = 0.53, df = 2 (P = 0.77); I² = 0%<br>Test for overall effect: Z = 4.28 (P < 0.0001) |                                                                                                                                                                                                                                                                          |  |  |  |  |  | Test for subgroup differences: Chi² = 0.34, df = 1 (P = 0.56), I² = 0% |  |  |  |  |  |  | ⊕⊕○○<br>○<br>LOW <sup>b,d</sup> | There are significant improvements in asthma control assessed by the ACQ-6 with benralizumab compared to placebo in patients with baseline blood eosinophil counts ≥300/µL but not <300/µL. There are no statistically significant differences between subgroups. |
| Study or Subgroup                                                                                                                                                                                                                                                                                              | Mean Difference                                                                                                                                                                                                                                                                                                | SE                                                                                                                                                                                                                                                                                                                                                                                                                                                                                                                                                                                                                                                                                                                                                                                                                                                                                                                                                                                                                                                                                                                                                                                                                                                                                                                                                                                                                                                                                                                                                                                                                                                                                                                                                                                                                                                                                                                                                                                                                                          | Benralizumab Total | Placebo Total | Weight            | Mean Difference IV, Random, 95% CI |    |                    |               |        |                                    |                                                          |  |  |  |  |  |  |               |       |        |     |     |        |                     |                          |       |        |          |           |               |                           |                                                                               |       |        |     |     |       |                     |                                                       |  |  |            |            |               |                            |                                                                                                                      |     |       |     |     |       |                   |                                                       |      |       |    |    |      |                    |                 |       |        |     |     |       |                      |                          |       |        |            |            |               |                          |                                                                                                                       |       |        |     |     |       |                      |                                                                        |  |  |            |            |               |                             |                                                                                                                       |                                                                                                                                                                                                                                                                          |  |  |  |  |  |                                                                        |  |  |  |  |  |  |                                 |                                                                                                                                                                                                                                                                   |
| <b>6.2.1 Baseline blood eosinophils &lt;300 cells/µL</b>                                                                                                                                                                                                                                                       |                                                                                                                                                                                                                                                                                                                |                                                                                                                                                                                                                                                                                                                                                                                                                                                                                                                                                                                                                                                                                                                                                                                                                                                                                                                                                                                                                                                                                                                                                                                                                                                                                                                                                                                                                                                                                                                                                                                                                                                                                                                                                                                                                                                                                                                                                                                                                                             |                    |               |                   |                                    |    |                    |               |        |                                    |                                                          |  |  |  |  |  |  |               |       |        |     |     |        |                     |                          |       |        |          |           |               |                           |                                                                               |       |        |     |     |       |                     |                                                       |  |  |            |            |               |                            |                                                                                                                      |     |       |     |     |       |                   |                                                       |      |       |    |    |      |                    |                 |       |        |     |     |       |                      |                          |       |        |            |            |               |                          |                                                                                                                       |       |        |     |     |       |                      |                                                                        |  |  |            |            |               |                             |                                                                                                                       |                                                                                                                                                                                                                                                                          |  |  |  |  |  |                                                                        |  |  |  |  |  |  |                                 |                                                                                                                                                                                                                                                                   |
| Bleecker 2016                                                                                                                                                                                                                                                                                                  | -0.22                                                                                                                                                                                                                                                                                                          | 0.1327                                                                                                                                                                                                                                                                                                                                                                                                                                                                                                                                                                                                                                                                                                                                                                                                                                                                                                                                                                                                                                                                                                                                                                                                                                                                                                                                                                                                                                                                                                                                                                                                                                                                                                                                                                                                                                                                                                                                                                                                                                      | 130                | 138           | 48.0%             | -0.22 [-0.48, 0.04]                |    |                    |               |        |                                    |                                                          |  |  |  |  |  |  |               |       |        |     |     |        |                     |                          |       |        |          |           |               |                           |                                                                               |       |        |     |     |       |                     |                                                       |  |  |            |            |               |                            |                                                                                                                      |     |       |     |     |       |                   |                                                       |      |       |    |    |      |                    |                 |       |        |     |     |       |                      |                          |       |        |            |            |               |                          |                                                                                                                       |       |        |     |     |       |                      |                                                                        |  |  |            |            |               |                             |                                                                                                                       |                                                                                                                                                                                                                                                                          |  |  |  |  |  |                                                                        |  |  |  |  |  |  |                                 |                                                                                                                                                                                                                                                                   |
| Castro 2014                                                                                                                                                                                                                                                                                                    | -1.11                                                                                                                                                                                                                                                                                                          | 0.5985                                                                                                                                                                                                                                                                                                                                                                                                                                                                                                                                                                                                                                                                                                                                                                                                                                                                                                                                                                                                                                                                                                                                                                                                                                                                                                                                                                                                                                                                                                                                                                                                                                                                                                                                                                                                                                                                                                                                                                                                                                      | 5                  | 60            | 3.9%              | -1.11 [-2.28, 0.06]                |    |                    |               |        |                                    |                                                          |  |  |  |  |  |  |               |       |        |     |     |        |                     |                          |       |        |          |           |               |                           |                                                                               |       |        |     |     |       |                     |                                                       |  |  |            |            |               |                            |                                                                                                                      |     |       |     |     |       |                   |                                                       |      |       |    |    |      |                    |                 |       |        |     |     |       |                      |                          |       |        |            |            |               |                          |                                                                                                                       |       |        |     |     |       |                      |                                                                        |  |  |            |            |               |                             |                                                                                                                       |                                                                                                                                                                                                                                                                          |  |  |  |  |  |                                                                        |  |  |  |  |  |  |                                 |                                                                                                                                                                                                                                                                   |
| FitzGerald 2016                                                                                                                                                                                                                                                                                                | -0.11                                                                                                                                                                                                                                                                                                          | 0.1327                                                                                                                                                                                                                                                                                                                                                                                                                                                                                                                                                                                                                                                                                                                                                                                                                                                                                                                                                                                                                                                                                                                                                                                                                                                                                                                                                                                                                                                                                                                                                                                                                                                                                                                                                                                                                                                                                                                                                                                                                                      | 125                | 122           | 48.0%             | -0.11 [-0.37, 0.15]                |    |                    |               |        |                                    |                                                          |  |  |  |  |  |  |               |       |        |     |     |        |                     |                          |       |        |          |           |               |                           |                                                                               |       |        |     |     |       |                     |                                                       |  |  |            |            |               |                            |                                                                                                                      |     |       |     |     |       |                   |                                                       |      |       |    |    |      |                    |                 |       |        |     |     |       |                      |                          |       |        |            |            |               |                          |                                                                                                                       |       |        |     |     |       |                      |                                                                        |  |  |            |            |               |                             |                                                                                                                       |                                                                                                                                                                                                                                                                          |  |  |  |  |  |                                                                        |  |  |  |  |  |  |                                 |                                                                                                                                                                                                                                                                   |
| <b>Subtotal (95% CI)</b>                                                                                                                                                                                                                                                                                       |                                                                                                                                                                                                                                                                                                                |                                                                                                                                                                                                                                                                                                                                                                                                                                                                                                                                                                                                                                                                                                                                                                                                                                                                                                                                                                                                                                                                                                                                                                                                                                                                                                                                                                                                                                                                                                                                                                                                                                                                                                                                                                                                                                                                                                                                                                                                                                             | <b>260</b>         | <b>320</b>    | <b>100.0%</b>     | <b>-0.20 [-0.44, 0.03]</b>         |    |                    |               |        |                                    |                                                          |  |  |  |  |  |  |               |       |        |     |     |        |                     |                          |       |        |          |           |               |                           |                                                                               |       |        |     |     |       |                     |                                                       |  |  |            |            |               |                            |                                                                                                                      |     |       |     |     |       |                   |                                                       |      |       |    |    |      |                    |                 |       |        |     |     |       |                      |                          |       |        |            |            |               |                          |                                                                                                                       |       |        |     |     |       |                      |                                                                        |  |  |            |            |               |                             |                                                                                                                       |                                                                                                                                                                                                                                                                          |  |  |  |  |  |                                                                        |  |  |  |  |  |  |                                 |                                                                                                                                                                                                                                                                   |
| Heterogeneity: Tau² = 0.01; Chi² = 2.78, df = 2 (P = 0.25); I² = 28%<br>Test for overall effect: Z = 1.67 (P = 0.09)                                                                                                                                                                                           |                                                                                                                                                                                                                                                                                                                |                                                                                                                                                                                                                                                                                                                                                                                                                                                                                                                                                                                                                                                                                                                                                                                                                                                                                                                                                                                                                                                                                                                                                                                                                                                                                                                                                                                                                                                                                                                                                                                                                                                                                                                                                                                                                                                                                                                                                                                                                                             |                    |               |                   |                                    |    |                    |               |        |                                    |                                                          |  |  |  |  |  |  |               |       |        |     |     |        |                     |                          |       |        |          |           |               |                           |                                                                               |       |        |     |     |       |                     |                                                       |  |  |            |            |               |                            |                                                                                                                      |     |       |     |     |       |                   |                                                       |      |       |    |    |      |                    |                 |       |        |     |     |       |                      |                          |       |        |            |            |               |                          |                                                                                                                       |       |        |     |     |       |                      |                                                                        |  |  |            |            |               |                             |                                                                                                                       |                                                                                                                                                                                                                                                                          |  |  |  |  |  |                                                                        |  |  |  |  |  |  |                                 |                                                                                                                                                                                                                                                                   |
| <b>6.2.2 Baseline blood eosinophils ≥300 cells/µL</b>                                                                                                                                                                                                                                                          |                                                                                                                                                                                                                                                                                                                |                                                                                                                                                                                                                                                                                                                                                                                                                                                                                                                                                                                                                                                                                                                                                                                                                                                                                                                                                                                                                                                                                                                                                                                                                                                                                                                                                                                                                                                                                                                                                                                                                                                                                                                                                                                                                                                                                                                                                                                                                                             |                    |               |                   |                                    |    |                    |               |        |                                    |                                                          |  |  |  |  |  |  |               |       |        |     |     |        |                     |                          |       |        |          |           |               |                           |                                                                               |       |        |     |     |       |                     |                                                       |  |  |            |            |               |                            |                                                                                                                      |     |       |     |     |       |                   |                                                       |      |       |    |    |      |                    |                 |       |        |     |     |       |                      |                          |       |        |            |            |               |                          |                                                                                                                       |       |        |     |     |       |                      |                                                                        |  |  |            |            |               |                             |                                                                                                                       |                                                                                                                                                                                                                                                                          |  |  |  |  |  |                                                                        |  |  |  |  |  |  |                                 |                                                                                                                                                                                                                                                                   |
| Bleecker 2016                                                                                                                                                                                                                                                                                                  | -0.29                                                                                                                                                                                                                                                                                                          | 0.0969                                                                                                                                                                                                                                                                                                                                                                                                                                                                                                                                                                                                                                                                                                                                                                                                                                                                                                                                                                                                                                                                                                                                                                                                                                                                                                                                                                                                                                                                                                                                                                                                                                                                                                                                                                                                                                                                                                                                                                                                                                      | 263                | 267           | 46.4%             | -0.29 [-0.48, -0.10]               |    |                    |               |        |                                    |                                                          |  |  |  |  |  |  |               |       |        |     |     |        |                     |                          |       |        |          |           |               |                           |                                                                               |       |        |     |     |       |                     |                                                       |  |  |            |            |               |                            |                                                                                                                      |     |       |     |     |       |                   |                                                       |      |       |    |    |      |                    |                 |       |        |     |     |       |                      |                          |       |        |            |            |               |                          |                                                                                                                       |       |        |     |     |       |                      |                                                                        |  |  |            |            |               |                             |                                                                                                                       |                                                                                                                                                                                                                                                                          |  |  |  |  |  |                                                                        |  |  |  |  |  |  |                                 |                                                                                                                                                                                                                                                                   |
| Castro 2014                                                                                                                                                                                                                                                                                                    | -0.44                                                                                                                                                                                                                                                                                                          | 0.2461                                                                                                                                                                                                                                                                                                                                                                                                                                                                                                                                                                                                                                                                                                                                                                                                                                                                                                                                                                                                                                                                                                                                                                                                                                                                                                                                                                                                                                                                                                                                                                                                                                                                                                                                                                                                                                                                                                                                                                                                                                      | 35                 | 38            | 7.2%              | -0.44 [-0.92, 0.04]                |    |                    |               |        |                                    |                                                          |  |  |  |  |  |  |               |       |        |     |     |        |                     |                          |       |        |          |           |               |                           |                                                                               |       |        |     |     |       |                     |                                                       |  |  |            |            |               |                            |                                                                                                                      |     |       |     |     |       |                   |                                                       |      |       |    |    |      |                    |                 |       |        |     |     |       |                      |                          |       |        |            |            |               |                          |                                                                                                                       |       |        |     |     |       |                      |                                                                        |  |  |            |            |               |                             |                                                                                                                       |                                                                                                                                                                                                                                                                          |  |  |  |  |  |                                                                        |  |  |  |  |  |  |                                 |                                                                                                                                                                                                                                                                   |
| FitzGerald 2016                                                                                                                                                                                                                                                                                                | -0.25                                                                                                                                                                                                                                                                                                          | 0.0969                                                                                                                                                                                                                                                                                                                                                                                                                                                                                                                                                                                                                                                                                                                                                                                                                                                                                                                                                                                                                                                                                                                                                                                                                                                                                                                                                                                                                                                                                                                                                                                                                                                                                                                                                                                                                                                                                                                                                                                                                                      | 239                | 247           | 46.4%             | -0.25 [-0.44, -0.06]               |    |                    |               |        |                                    |                                                          |  |  |  |  |  |  |               |       |        |     |     |        |                     |                          |       |        |          |           |               |                           |                                                                               |       |        |     |     |       |                     |                                                       |  |  |            |            |               |                            |                                                                                                                      |     |       |     |     |       |                   |                                                       |      |       |    |    |      |                    |                 |       |        |     |     |       |                      |                          |       |        |            |            |               |                          |                                                                                                                       |       |        |     |     |       |                      |                                                                        |  |  |            |            |               |                             |                                                                                                                       |                                                                                                                                                                                                                                                                          |  |  |  |  |  |                                                                        |  |  |  |  |  |  |                                 |                                                                                                                                                                                                                                                                   |
| <b>Subtotal (95% CI)</b>                                                                                                                                                                                                                                                                                       |                                                                                                                                                                                                                                                                                                                |                                                                                                                                                                                                                                                                                                                                                                                                                                                                                                                                                                                                                                                                                                                                                                                                                                                                                                                                                                                                                                                                                                                                                                                                                                                                                                                                                                                                                                                                                                                                                                                                                                                                                                                                                                                                                                                                                                                                                                                                                                             | <b>537</b>         | <b>552</b>    | <b>100.0%</b>     | <b>-0.28 [-0.41, -0.15]</b>        |    |                    |               |        |                                    |                                                          |  |  |  |  |  |  |               |       |        |     |     |        |                     |                          |       |        |          |           |               |                           |                                                                               |       |        |     |     |       |                     |                                                       |  |  |            |            |               |                            |                                                                                                                      |     |       |     |     |       |                   |                                                       |      |       |    |    |      |                    |                 |       |        |     |     |       |                      |                          |       |        |            |            |               |                          |                                                                                                                       |       |        |     |     |       |                      |                                                                        |  |  |            |            |               |                             |                                                                                                                       |                                                                                                                                                                                                                                                                          |  |  |  |  |  |                                                                        |  |  |  |  |  |  |                                 |                                                                                                                                                                                                                                                                   |
| Heterogeneity: Tau² = 0.00; Chi² = 0.53, df = 2 (P = 0.77); I² = 0%<br>Test for overall effect: Z = 4.28 (P < 0.0001)                                                                                                                                                                                          |                                                                                                                                                                                                                                                                                                                |                                                                                                                                                                                                                                                                                                                                                                                                                                                                                                                                                                                                                                                                                                                                                                                                                                                                                                                                                                                                                                                                                                                                                                                                                                                                                                                                                                                                                                                                                                                                                                                                                                                                                                                                                                                                                                                                                                                                                                                                                                             |                    |               |                   |                                    |    |                    |               |        |                                    |                                                          |  |  |  |  |  |  |               |       |        |     |     |        |                     |                          |       |        |          |           |               |                           |                                                                               |       |        |     |     |       |                     |                                                       |  |  |            |            |               |                            |                                                                                                                      |     |       |     |     |       |                   |                                                       |      |       |    |    |      |                    |                 |       |        |     |     |       |                      |                          |       |        |            |            |               |                          |                                                                                                                       |       |        |     |     |       |                      |                                                                        |  |  |            |            |               |                             |                                                                                                                       |                                                                                                                                                                                                                                                                          |  |  |  |  |  |                                                                        |  |  |  |  |  |  |                                 |                                                                                                                                                                                                                                                                   |
| Test for subgroup differences: Chi² = 0.34, df = 1 (P = 0.56), I² = 0%                                                                                                                                                                                                                                         |                                                                                                                                                                                                                                                                                                                |                                                                                                                                                                                                                                                                                                                                                                                                                                                                                                                                                                                                                                                                                                                                                                                                                                                                                                                                                                                                                                                                                                                                                                                                                                                                                                                                                                                                                                                                                                                                                                                                                                                                                                                                                                                                                                                                                                                                                                                                                                             |                    |               |                   |                                    |    |                    |               |        |                                    |                                                          |  |  |  |  |  |  |               |       |        |     |     |        |                     |                          |       |        |          |           |               |                           |                                                                               |       |        |     |     |       |                     |                                                       |  |  |            |            |               |                            |                                                                                                                      |     |       |     |     |       |                   |                                                       |      |       |    |    |      |                    |                 |       |        |     |     |       |                      |                          |       |        |            |            |               |                          |                                                                                                                       |       |        |     |     |       |                      |                                                                        |  |  |            |            |               |                             |                                                                                                                       |                                                                                                                                                                                                                                                                          |  |  |  |  |  |                                                                        |  |  |  |  |  |  |                                 |                                                                                                                                                                                                                                                                   |

| Outcome<br>№ of participants<br>(studies)                                                                                                                                                                                                                                          | Relative effect<br>(95% CI)                                                                                                                                                                                                                                                                                                                     | Anticipated absolute effects (95% CI)                                                                                                                                                                                                                                                                                                                                                                                                                                                                                                                                                                                                                                                                                                                                                                                                                                                                                                                                                                                                                                                                                                                                                                                                                                                                                                                                                                                                                                                                                                                                                                                                                                                                                                                                                                                                                                                                                                                                                                                                                                                                                                                                          |           |            |               | Certainty                   | What happens               |                                      |                                            |                                            |  |        |                                            |                                            |                                      |      |       |       |                                                          |    |       |                                                          |  |  |  |  |  |               |         |        |     |           |       |                      |    |             |         |        |        |                    |       |                          |                 |        |           |     |     |           |                    |                           |                                                                               |            |  |            |               |                            |                                                                                                                      |  |  |                                                           |  |  |  |  |  |                                                       |  |  |  |           |     |     |    |   |               |         |        |                    |                          |       |                      |           |             |        |           |               |                           |                                                                               |                     |                 |         |        |     |     |       |                      |                                      |                                                                                                                                                                                                                                                                                            |            |  |            |               |                             |                                                                                                                       |  |  |  |  |  |  |  |  |                                                                        |  |  |  |  |  |  |  |  |                                        |                                                                                                                                                                                                                                                    |
|------------------------------------------------------------------------------------------------------------------------------------------------------------------------------------------------------------------------------------------------------------------------------------|-------------------------------------------------------------------------------------------------------------------------------------------------------------------------------------------------------------------------------------------------------------------------------------------------------------------------------------------------|--------------------------------------------------------------------------------------------------------------------------------------------------------------------------------------------------------------------------------------------------------------------------------------------------------------------------------------------------------------------------------------------------------------------------------------------------------------------------------------------------------------------------------------------------------------------------------------------------------------------------------------------------------------------------------------------------------------------------------------------------------------------------------------------------------------------------------------------------------------------------------------------------------------------------------------------------------------------------------------------------------------------------------------------------------------------------------------------------------------------------------------------------------------------------------------------------------------------------------------------------------------------------------------------------------------------------------------------------------------------------------------------------------------------------------------------------------------------------------------------------------------------------------------------------------------------------------------------------------------------------------------------------------------------------------------------------------------------------------------------------------------------------------------------------------------------------------------------------------------------------------------------------------------------------------------------------------------------------------------------------------------------------------------------------------------------------------------------------------------------------------------------------------------------------------|-----------|------------|---------------|-----------------------------|----------------------------|--------------------------------------|--------------------------------------------|--------------------------------------------|--|--------|--------------------------------------------|--------------------------------------------|--------------------------------------|------|-------|-------|----------------------------------------------------------|----|-------|----------------------------------------------------------|--|--|--|--|--|---------------|---------|--------|-----|-----------|-------|----------------------|----|-------------|---------|--------|--------|--------------------|-------|--------------------------|-----------------|--------|-----------|-----|-----|-----------|--------------------|---------------------------|-------------------------------------------------------------------------------|------------|--|------------|---------------|----------------------------|----------------------------------------------------------------------------------------------------------------------|--|--|-----------------------------------------------------------|--|--|--|--|--|-------------------------------------------------------|--|--|--|-----------|-----|-----|----|---|---------------|---------|--------|--------------------|--------------------------|-------|----------------------|-----------|-------------|--------|-----------|---------------|---------------------------|-------------------------------------------------------------------------------|---------------------|-----------------|---------|--------|-----|-----|-------|----------------------|--------------------------------------|--------------------------------------------------------------------------------------------------------------------------------------------------------------------------------------------------------------------------------------------------------------------------------------------|------------|--|------------|---------------|-----------------------------|-----------------------------------------------------------------------------------------------------------------------|--|--|--|--|--|--|--|--|------------------------------------------------------------------------|--|--|--|--|--|--|--|--|----------------------------------------|----------------------------------------------------------------------------------------------------------------------------------------------------------------------------------------------------------------------------------------------------|
|                                                                                                                                                                                                                                                                                    |                                                                                                                                                                                                                                                                                                                                                 |                                                                                                                                                                                                                                                                                                                                                                                                                                                                                                                                                                                                                                                                                                                                                                                                                                                                                                                                                                                                                                                                                                                                                                                                                                                                                                                                                                                                                                                                                                                                                                                                                                                                                                                                                                                                                                                                                                                                                                                                                                                                                                                                                                                |           |            | Difference    |                             |                            |                                      |                                            |                                            |  |        |                                            |                                            |                                      |      |       |       |                                                          |    |       |                                                          |  |  |  |  |  |               |         |        |     |           |       |                      |    |             |         |        |        |                    |       |                          |                 |        |           |     |     |           |                    |                           |                                                                               |            |  |            |               |                            |                                                                                                                      |  |  |                                                           |  |  |  |  |  |                                                       |  |  |  |           |     |     |    |   |               |         |        |                    |                          |       |                      |           |             |        |           |               |                           |                                                                               |                     |                 |         |        |     |     |       |                      |                                      |                                                                                                                                                                                                                                                                                            |            |  |            |               |                             |                                                                                                                       |  |  |  |  |  |  |  |  |                                                                        |  |  |  |  |  |  |  |  |                                        |                                                                                                                                                                                                                                                    |
| <b>Asthma control (at week 52)</b><br>assessed with: Asthma Control Questionnaire (ACQ-6); Scale from: 0 to 6; lower values indicate better asthma control; MCID 0.5<br>follow up: 52 weeks;<br>№ of participants: 51<br>(1 RCT) <sup>4</sup><br><br>Importance: CRITICAL          | Mean ACQ-6 score at week 52 in patients treated with benralizumab compared to placebo were: Unspecified blood eosinophil count: Mean difference (95% CI) = 0.20 (-0.30 to 0.70), n=51; Eosinophil ≥300/μL: Mean difference (95% CI) = 0.10 (-0.49 to 0.69), n=40.                                                                               | <table><thead><tr><th rowspan="2">Study or Subgroup</th><th colspan="3">Benralizumab</th><th colspan="3">Placebo</th><th rowspan="2">Weight</th><th rowspan="2">Mean Difference<br/>IV, Fixed, 95% CI</th><th rowspan="2">Mean Difference<br/>IV, Fixed, 95% CI</th></tr><tr><th>Mean</th><th>SD</th><th>Total</th><th>Mean</th><th>SD</th><th>Total</th></tr></thead><tbody><tr><td colspan="10"><b>6.3.1 Unspecified baseline blood eosinophil count</b></td></tr><tr><td>Park 2016</td><td>1</td><td>0.8</td><td>26</td><td>0.8</td><td>1</td><td>25</td><td>100.0%</td><td>0.20 [-0.30, 0.70]</td><td rowspan="3"></td></tr><tr><td><b>Subtotal (95% CI)</b></td><td></td><td></td><td><b>26</b></td><td></td><td></td><td><b>25</b></td><td><b>100.0%</b></td><td><b>0.20 [-0.30, 0.70]</b></td></tr><tr><td colspan="9">Heterogeneity: Not applicable<br/>Test for overall effect: Z = 0.79 (P = 0.43)</td></tr><tr><td colspan="10"><b>6.3.2 Baseline blood eosinophils ≥ 300/μL cells/μL</b></td></tr><tr><td>Park 2016</td><td>1.1</td><td>0.8</td><td>19</td><td>1</td><td>1.1</td><td>21</td><td>100.0%</td><td>0.10 [-0.49, 0.69]</td></tr><tr><td><b>Subtotal (95% CI)</b></td><td></td><td></td><td><b>19</b></td><td></td><td></td><td><b>21</b></td><td><b>100.0%</b></td><td><b>0.10 [-0.49, 0.69]</b></td></tr><tr><td colspan="9">Heterogeneity: Not applicable<br/>Test for overall effect: Z = 0.33 (P = 0.74)</td></tr></tbody></table>                                                                                                                                                                                                                                                                                                                                                                                                                                                                                                                                                                                                                                                                                                                  |           |            |               | Study or Subgroup           | Benralizumab               |                                      |                                            | Placebo                                    |  |        | Weight                                     | Mean Difference<br>IV, Fixed, 95% CI       | Mean Difference<br>IV, Fixed, 95% CI | Mean | SD    | Total | Mean                                                     | SD | Total | <b>6.3.1 Unspecified baseline blood eosinophil count</b> |  |  |  |  |  |               |         |        |     | Park 2016 | 1     | 0.8                  | 26 | 0.8         | 1       | 25     | 100.0% | 0.20 [-0.30, 0.70] |       | <b>Subtotal (95% CI)</b> |                 |        | <b>26</b> |     |     | <b>25</b> | <b>100.0%</b>      | <b>0.20 [-0.30, 0.70]</b> | Heterogeneity: Not applicable<br>Test for overall effect: Z = 0.79 (P = 0.43) |            |  |            |               |                            |                                                                                                                      |  |  | <b>6.3.2 Baseline blood eosinophils ≥ 300/μL cells/μL</b> |  |  |  |  |  |                                                       |  |  |  | Park 2016 | 1.1 | 0.8 | 19 | 1 | 1.1           | 21      | 100.0% | 0.10 [-0.49, 0.69] | <b>Subtotal (95% CI)</b> |       |                      | <b>19</b> |             |        | <b>21</b> | <b>100.0%</b> | <b>0.10 [-0.49, 0.69]</b> | Heterogeneity: Not applicable<br>Test for overall effect: Z = 0.33 (P = 0.74) |                     |                 |         |        |     |     |       |                      | ⊕○○○<br>○<br>VERY LOW <sup>e,f</sup> | There are no significant improvements in asthma control assessed by the ACQ-6 with benralizumab compared to placebo in patients with baseline blood eosinophil counts ≥300/μL or with unspecified eosinophil counts at 52 weeks of follow up. There is appreciable overlap of the 95% CIs. |            |  |            |               |                             |                                                                                                                       |  |  |  |  |  |  |  |  |                                                                        |  |  |  |  |  |  |  |  |                                        |                                                                                                                                                                                                                                                    |
| Study or Subgroup                                                                                                                                                                                                                                                                  | Benralizumab                                                                                                                                                                                                                                                                                                                                    |                                                                                                                                                                                                                                                                                                                                                                                                                                                                                                                                                                                                                                                                                                                                                                                                                                                                                                                                                                                                                                                                                                                                                                                                                                                                                                                                                                                                                                                                                                                                                                                                                                                                                                                                                                                                                                                                                                                                                                                                                                                                                                                                                                                |           | Placebo    |               |                             | Weight                     | Mean Difference<br>IV, Fixed, 95% CI | Mean Difference<br>IV, Fixed, 95% CI       |                                            |  |        |                                            |                                            |                                      |      |       |       |                                                          |    |       |                                                          |  |  |  |  |  |               |         |        |     |           |       |                      |    |             |         |        |        |                    |       |                          |                 |        |           |     |     |           |                    |                           |                                                                               |            |  |            |               |                            |                                                                                                                      |  |  |                                                           |  |  |  |  |  |                                                       |  |  |  |           |     |     |    |   |               |         |        |                    |                          |       |                      |           |             |        |           |               |                           |                                                                               |                     |                 |         |        |     |     |       |                      |                                      |                                                                                                                                                                                                                                                                                            |            |  |            |               |                             |                                                                                                                       |  |  |  |  |  |  |  |  |                                                                        |  |  |  |  |  |  |  |  |                                        |                                                                                                                                                                                                                                                    |
|                                                                                                                                                                                                                                                                                    | Mean                                                                                                                                                                                                                                                                                                                                            | SD                                                                                                                                                                                                                                                                                                                                                                                                                                                                                                                                                                                                                                                                                                                                                                                                                                                                                                                                                                                                                                                                                                                                                                                                                                                                                                                                                                                                                                                                                                                                                                                                                                                                                                                                                                                                                                                                                                                                                                                                                                                                                                                                                                             | Total     | Mean       | SD            | Total                       |                            |                                      |                                            |                                            |  |        |                                            |                                            |                                      |      |       |       |                                                          |    |       |                                                          |  |  |  |  |  |               |         |        |     |           |       |                      |    |             |         |        |        |                    |       |                          |                 |        |           |     |     |           |                    |                           |                                                                               |            |  |            |               |                            |                                                                                                                      |  |  |                                                           |  |  |  |  |  |                                                       |  |  |  |           |     |     |    |   |               |         |        |                    |                          |       |                      |           |             |        |           |               |                           |                                                                               |                     |                 |         |        |     |     |       |                      |                                      |                                                                                                                                                                                                                                                                                            |            |  |            |               |                             |                                                                                                                       |  |  |  |  |  |  |  |  |                                                                        |  |  |  |  |  |  |  |  |                                        |                                                                                                                                                                                                                                                    |
| <b>6.3.1 Unspecified baseline blood eosinophil count</b>                                                                                                                                                                                                                           |                                                                                                                                                                                                                                                                                                                                                 |                                                                                                                                                                                                                                                                                                                                                                                                                                                                                                                                                                                                                                                                                                                                                                                                                                                                                                                                                                                                                                                                                                                                                                                                                                                                                                                                                                                                                                                                                                                                                                                                                                                                                                                                                                                                                                                                                                                                                                                                                                                                                                                                                                                |           |            |               |                             |                            |                                      |                                            |                                            |  |        |                                            |                                            |                                      |      |       |       |                                                          |    |       |                                                          |  |  |  |  |  |               |         |        |     |           |       |                      |    |             |         |        |        |                    |       |                          |                 |        |           |     |     |           |                    |                           |                                                                               |            |  |            |               |                            |                                                                                                                      |  |  |                                                           |  |  |  |  |  |                                                       |  |  |  |           |     |     |    |   |               |         |        |                    |                          |       |                      |           |             |        |           |               |                           |                                                                               |                     |                 |         |        |     |     |       |                      |                                      |                                                                                                                                                                                                                                                                                            |            |  |            |               |                             |                                                                                                                       |  |  |  |  |  |  |  |  |                                                                        |  |  |  |  |  |  |  |  |                                        |                                                                                                                                                                                                                                                    |
| Park 2016                                                                                                                                                                                                                                                                          | 1                                                                                                                                                                                                                                                                                                                                               | 0.8                                                                                                                                                                                                                                                                                                                                                                                                                                                                                                                                                                                                                                                                                                                                                                                                                                                                                                                                                                                                                                                                                                                                                                                                                                                                                                                                                                                                                                                                                                                                                                                                                                                                                                                                                                                                                                                                                                                                                                                                                                                                                                                                                                            | 26        | 0.8        | 1             | 25                          | 100.0%                     | 0.20 [-0.30, 0.70]                   |                                            |                                            |  |        |                                            |                                            |                                      |      |       |       |                                                          |    |       |                                                          |  |  |  |  |  |               |         |        |     |           |       |                      |    |             |         |        |        |                    |       |                          |                 |        |           |     |     |           |                    |                           |                                                                               |            |  |            |               |                            |                                                                                                                      |  |  |                                                           |  |  |  |  |  |                                                       |  |  |  |           |     |     |    |   |               |         |        |                    |                          |       |                      |           |             |        |           |               |                           |                                                                               |                     |                 |         |        |     |     |       |                      |                                      |                                                                                                                                                                                                                                                                                            |            |  |            |               |                             |                                                                                                                       |  |  |  |  |  |  |  |  |                                                                        |  |  |  |  |  |  |  |  |                                        |                                                                                                                                                                                                                                                    |
| <b>Subtotal (95% CI)</b>                                                                                                                                                                                                                                                           |                                                                                                                                                                                                                                                                                                                                                 |                                                                                                                                                                                                                                                                                                                                                                                                                                                                                                                                                                                                                                                                                                                                                                                                                                                                                                                                                                                                                                                                                                                                                                                                                                                                                                                                                                                                                                                                                                                                                                                                                                                                                                                                                                                                                                                                                                                                                                                                                                                                                                                                                                                | <b>26</b> |            |               | <b>25</b>                   | <b>100.0%</b>              | <b>0.20 [-0.30, 0.70]</b>            |                                            |                                            |  |        |                                            |                                            |                                      |      |       |       |                                                          |    |       |                                                          |  |  |  |  |  |               |         |        |     |           |       |                      |    |             |         |        |        |                    |       |                          |                 |        |           |     |     |           |                    |                           |                                                                               |            |  |            |               |                            |                                                                                                                      |  |  |                                                           |  |  |  |  |  |                                                       |  |  |  |           |     |     |    |   |               |         |        |                    |                          |       |                      |           |             |        |           |               |                           |                                                                               |                     |                 |         |        |     |     |       |                      |                                      |                                                                                                                                                                                                                                                                                            |            |  |            |               |                             |                                                                                                                       |  |  |  |  |  |  |  |  |                                                                        |  |  |  |  |  |  |  |  |                                        |                                                                                                                                                                                                                                                    |
| Heterogeneity: Not applicable<br>Test for overall effect: Z = 0.79 (P = 0.43)                                                                                                                                                                                                      |                                                                                                                                                                                                                                                                                                                                                 |                                                                                                                                                                                                                                                                                                                                                                                                                                                                                                                                                                                                                                                                                                                                                                                                                                                                                                                                                                                                                                                                                                                                                                                                                                                                                                                                                                                                                                                                                                                                                                                                                                                                                                                                                                                                                                                                                                                                                                                                                                                                                                                                                                                |           |            |               |                             |                            |                                      |                                            |                                            |  |        |                                            |                                            |                                      |      |       |       |                                                          |    |       |                                                          |  |  |  |  |  |               |         |        |     |           |       |                      |    |             |         |        |        |                    |       |                          |                 |        |           |     |     |           |                    |                           |                                                                               |            |  |            |               |                            |                                                                                                                      |  |  |                                                           |  |  |  |  |  |                                                       |  |  |  |           |     |     |    |   |               |         |        |                    |                          |       |                      |           |             |        |           |               |                           |                                                                               |                     |                 |         |        |     |     |       |                      |                                      |                                                                                                                                                                                                                                                                                            |            |  |            |               |                             |                                                                                                                       |  |  |  |  |  |  |  |  |                                                                        |  |  |  |  |  |  |  |  |                                        |                                                                                                                                                                                                                                                    |
| <b>6.3.2 Baseline blood eosinophils ≥ 300/μL cells/μL</b>                                                                                                                                                                                                                          |                                                                                                                                                                                                                                                                                                                                                 |                                                                                                                                                                                                                                                                                                                                                                                                                                                                                                                                                                                                                                                                                                                                                                                                                                                                                                                                                                                                                                                                                                                                                                                                                                                                                                                                                                                                                                                                                                                                                                                                                                                                                                                                                                                                                                                                                                                                                                                                                                                                                                                                                                                |           |            |               |                             |                            |                                      |                                            |                                            |  |        |                                            |                                            |                                      |      |       |       |                                                          |    |       |                                                          |  |  |  |  |  |               |         |        |     |           |       |                      |    |             |         |        |        |                    |       |                          |                 |        |           |     |     |           |                    |                           |                                                                               |            |  |            |               |                            |                                                                                                                      |  |  |                                                           |  |  |  |  |  |                                                       |  |  |  |           |     |     |    |   |               |         |        |                    |                          |       |                      |           |             |        |           |               |                           |                                                                               |                     |                 |         |        |     |     |       |                      |                                      |                                                                                                                                                                                                                                                                                            |            |  |            |               |                             |                                                                                                                       |  |  |  |  |  |  |  |  |                                                                        |  |  |  |  |  |  |  |  |                                        |                                                                                                                                                                                                                                                    |
| Park 2016                                                                                                                                                                                                                                                                          | 1.1                                                                                                                                                                                                                                                                                                                                             | 0.8                                                                                                                                                                                                                                                                                                                                                                                                                                                                                                                                                                                                                                                                                                                                                                                                                                                                                                                                                                                                                                                                                                                                                                                                                                                                                                                                                                                                                                                                                                                                                                                                                                                                                                                                                                                                                                                                                                                                                                                                                                                                                                                                                                            | 19        | 1          | 1.1           | 21                          | 100.0%                     | 0.10 [-0.49, 0.69]                   |                                            |                                            |  |        |                                            |                                            |                                      |      |       |       |                                                          |    |       |                                                          |  |  |  |  |  |               |         |        |     |           |       |                      |    |             |         |        |        |                    |       |                          |                 |        |           |     |     |           |                    |                           |                                                                               |            |  |            |               |                            |                                                                                                                      |  |  |                                                           |  |  |  |  |  |                                                       |  |  |  |           |     |     |    |   |               |         |        |                    |                          |       |                      |           |             |        |           |               |                           |                                                                               |                     |                 |         |        |     |     |       |                      |                                      |                                                                                                                                                                                                                                                                                            |            |  |            |               |                             |                                                                                                                       |  |  |  |  |  |  |  |  |                                                                        |  |  |  |  |  |  |  |  |                                        |                                                                                                                                                                                                                                                    |
| <b>Subtotal (95% CI)</b>                                                                                                                                                                                                                                                           |                                                                                                                                                                                                                                                                                                                                                 |                                                                                                                                                                                                                                                                                                                                                                                                                                                                                                                                                                                                                                                                                                                                                                                                                                                                                                                                                                                                                                                                                                                                                                                                                                                                                                                                                                                                                                                                                                                                                                                                                                                                                                                                                                                                                                                                                                                                                                                                                                                                                                                                                                                | <b>19</b> |            |               | <b>21</b>                   | <b>100.0%</b>              | <b>0.10 [-0.49, 0.69]</b>            |                                            |                                            |  |        |                                            |                                            |                                      |      |       |       |                                                          |    |       |                                                          |  |  |  |  |  |               |         |        |     |           |       |                      |    |             |         |        |        |                    |       |                          |                 |        |           |     |     |           |                    |                           |                                                                               |            |  |            |               |                            |                                                                                                                      |  |  |                                                           |  |  |  |  |  |                                                       |  |  |  |           |     |     |    |   |               |         |        |                    |                          |       |                      |           |             |        |           |               |                           |                                                                               |                     |                 |         |        |     |     |       |                      |                                      |                                                                                                                                                                                                                                                                                            |            |  |            |               |                             |                                                                                                                       |  |  |  |  |  |  |  |  |                                                                        |  |  |  |  |  |  |  |  |                                        |                                                                                                                                                                                                                                                    |
| Heterogeneity: Not applicable<br>Test for overall effect: Z = 0.33 (P = 0.74)                                                                                                                                                                                                      |                                                                                                                                                                                                                                                                                                                                                 |                                                                                                                                                                                                                                                                                                                                                                                                                                                                                                                                                                                                                                                                                                                                                                                                                                                                                                                                                                                                                                                                                                                                                                                                                                                                                                                                                                                                                                                                                                                                                                                                                                                                                                                                                                                                                                                                                                                                                                                                                                                                                                                                                                                |           |            |               |                             |                            |                                      |                                            |                                            |  |        |                                            |                                            |                                      |      |       |       |                                                          |    |       |                                                          |  |  |  |  |  |               |         |        |     |           |       |                      |    |             |         |        |        |                    |       |                          |                 |        |           |     |     |           |                    |                           |                                                                               |            |  |            |               |                            |                                                                                                                      |  |  |                                                           |  |  |  |  |  |                                                       |  |  |  |           |     |     |    |   |               |         |        |                    |                          |       |                      |           |             |        |           |               |                           |                                                                               |                     |                 |         |        |     |     |       |                      |                                      |                                                                                                                                                                                                                                                                                            |            |  |            |               |                             |                                                                                                                       |  |  |  |  |  |  |  |  |                                                                        |  |  |  |  |  |  |  |  |                                        |                                                                                                                                                                                                                                                    |
| <b>Asthma symptoms (change from baseline)</b><br>assessed with: different symptom scores; lower scores indicate less frequent and/or severe symptoms;<br>follow up: range 28 weeks to 56 weeks<br>№ of participants: 1220<br>(3 RCTs) <sup>1,2,3</sup><br><br>Importance: CRITICAL | Mean change from baseline in asthma symptom scores in patients treated with benralizumab compared to placebo were: Eosinophil <300/μL: standardized mean difference (95% CI) = -0.19 (-0.47 to 0.10), n=591; Eosinophil ≥300/μL: standardized mean difference (95% CI) = -0.20 (-0.32 to -0.08), n=1085. Test for subgroup differences, p=0.93. | <table><thead><tr><th rowspan="2">Study or Subgroup</th><th rowspan="2">Std. Mean Difference<br/>SE</th><th colspan="2">Benralizumab</th><th colspan="2">Placebo</th><th rowspan="2">Weight</th><th rowspan="2">Std. Mean Difference<br/>IV, Random, 95% CI</th><th rowspan="2">Std. Mean Difference<br/>IV, Random, 95% CI</th></tr><tr><th>Total</th><th>SE</th><th>Total</th><th>SE</th></tr></thead><tbody><tr><td colspan="9"><b>6.4.1 Baseline blood eosinophils &lt;300 cells/μL</b></td></tr><tr><td>Bleecker 2016</td><td>-0.2485</td><td>0.1232</td><td>127</td><td>139</td><td>45.1%</td><td>-0.25 [-0.49, -0.01]</td><td rowspan="4"></td></tr><tr><td>Castro 2014</td><td>-0.7267</td><td>0.4003</td><td>7</td><td>72</td><td>10.9%</td><td>-0.73 [-1.51, 0.06]</td></tr><tr><td>Fitzgerald 2016</td><td>0.0086</td><td>0.1275</td><td>124</td><td>122</td><td>44.0%</td><td>0.01 [-0.24, 0.26]</td></tr><tr><td><b>Subtotal (95% CI)</b></td><td></td><td><b>258</b></td><td></td><td><b>333</b></td><td><b>100.0%</b></td><td><b>-0.19 [-0.47, 0.10]</b></td></tr><tr><td colspan="9">Heterogeneity: Tau² = 0.03; Chi² = 4.26, df = 2 (P = 0.12), I² = 53%<br/>Test for overall effect: Z = 1.30 (P = 0.19)</td></tr><tr><td colspan="9"><b>6.4.2 Baseline blood eosinophils ≥300 cells/μL</b></td></tr><tr><td>Bleecker 2016</td><td>-0.2125</td><td>0.0871</td><td>263</td><td>267</td><td>48.9%</td><td>-0.21 [-0.38, -0.04]</td><td rowspan="4"></td></tr><tr><td>Castro 2014</td><td>-0.096</td><td>0.2387</td><td>32</td><td>39</td><td>6.5%</td><td>-0.10 [-0.56, 0.37]</td></tr><tr><td>Fitzgerald 2016</td><td>-0.2046</td><td>0.0912</td><td>237</td><td>247</td><td>44.6%</td><td>-0.20 [-0.38, -0.03]</td></tr><tr><td><b>Subtotal (95% CI)</b></td><td></td><td><b>532</b></td><td></td><td><b>553</b></td><td><b>100.0%</b></td><td><b>-0.20 [-0.32, -0.08]</b></td></tr><tr><td colspan="9">Heterogeneity: Tau² = 0.00; Chi² = 0.21, df = 2 (P = 0.90), I² = 0%<br/>Test for overall effect: Z = 3.31 (P = 0.0009)</td></tr><tr><td colspan="9">Test for subgroup differences: Chi² = 0.01, df = 1 (P = 0.93), I² = 0%</td></tr></tbody></table> |           |            |               | Study or Subgroup           | Std. Mean Difference<br>SE | Benralizumab                         |                                            | Placebo                                    |  | Weight | Std. Mean Difference<br>IV, Random, 95% CI | Std. Mean Difference<br>IV, Random, 95% CI | Total                                | SE   | Total | SE    | <b>6.4.1 Baseline blood eosinophils &lt;300 cells/μL</b> |    |       |                                                          |  |  |  |  |  | Bleecker 2016 | -0.2485 | 0.1232 | 127 | 139       | 45.1% | -0.25 [-0.49, -0.01] |    | Castro 2014 | -0.7267 | 0.4003 | 7      | 72                 | 10.9% | -0.73 [-1.51, 0.06]      | Fitzgerald 2016 | 0.0086 | 0.1275    | 124 | 122 | 44.0%     | 0.01 [-0.24, 0.26] | <b>Subtotal (95% CI)</b>  |                                                                               | <b>258</b> |  | <b>333</b> | <b>100.0%</b> | <b>-0.19 [-0.47, 0.10]</b> | Heterogeneity: Tau² = 0.03; Chi² = 4.26, df = 2 (P = 0.12), I² = 53%<br>Test for overall effect: Z = 1.30 (P = 0.19) |  |  |                                                           |  |  |  |  |  | <b>6.4.2 Baseline blood eosinophils ≥300 cells/μL</b> |  |  |  |           |     |     |    |   | Bleecker 2016 | -0.2125 | 0.0871 | 263                | 267                      | 48.9% | -0.21 [-0.38, -0.04] |           | Castro 2014 | -0.096 | 0.2387    | 32            | 39                        | 6.5%                                                                          | -0.10 [-0.56, 0.37] | Fitzgerald 2016 | -0.2046 | 0.0912 | 237 | 247 | 44.6% | -0.20 [-0.38, -0.03] | <b>Subtotal (95% CI)</b>             |                                                                                                                                                                                                                                                                                            | <b>532</b> |  | <b>553</b> | <b>100.0%</b> | <b>-0.20 [-0.32, -0.08]</b> | Heterogeneity: Tau² = 0.00; Chi² = 0.21, df = 2 (P = 0.90), I² = 0%<br>Test for overall effect: Z = 3.31 (P = 0.0009) |  |  |  |  |  |  |  |  | Test for subgroup differences: Chi² = 0.01, df = 1 (P = 0.93), I² = 0% |  |  |  |  |  |  |  |  | ⊕○○○<br>○<br>VERY LOW <sup>b,g,h</sup> | There are significant improvements in asthma symptoms with benralizumab compared to placebo in those patients with baseline blood eosinophil counts ≥300/μL but not <300/μL. There are no statistically significant differences between subgroups. |
| Study or Subgroup                                                                                                                                                                                                                                                                  | Std. Mean Difference<br>SE                                                                                                                                                                                                                                                                                                                      | Benralizumab                                                                                                                                                                                                                                                                                                                                                                                                                                                                                                                                                                                                                                                                                                                                                                                                                                                                                                                                                                                                                                                                                                                                                                                                                                                                                                                                                                                                                                                                                                                                                                                                                                                                                                                                                                                                                                                                                                                                                                                                                                                                                                                                                                   |           | Placebo    |               |                             |                            | Weight                               | Std. Mean Difference<br>IV, Random, 95% CI | Std. Mean Difference<br>IV, Random, 95% CI |  |        |                                            |                                            |                                      |      |       |       |                                                          |    |       |                                                          |  |  |  |  |  |               |         |        |     |           |       |                      |    |             |         |        |        |                    |       |                          |                 |        |           |     |     |           |                    |                           |                                                                               |            |  |            |               |                            |                                                                                                                      |  |  |                                                           |  |  |  |  |  |                                                       |  |  |  |           |     |     |    |   |               |         |        |                    |                          |       |                      |           |             |        |           |               |                           |                                                                               |                     |                 |         |        |     |     |       |                      |                                      |                                                                                                                                                                                                                                                                                            |            |  |            |               |                             |                                                                                                                       |  |  |  |  |  |  |  |  |                                                                        |  |  |  |  |  |  |  |  |                                        |                                                                                                                                                                                                                                                    |
|                                                                                                                                                                                                                                                                                    |                                                                                                                                                                                                                                                                                                                                                 | Total                                                                                                                                                                                                                                                                                                                                                                                                                                                                                                                                                                                                                                                                                                                                                                                                                                                                                                                                                                                                                                                                                                                                                                                                                                                                                                                                                                                                                                                                                                                                                                                                                                                                                                                                                                                                                                                                                                                                                                                                                                                                                                                                                                          | SE        | Total      | SE            |                             |                            |                                      |                                            |                                            |  |        |                                            |                                            |                                      |      |       |       |                                                          |    |       |                                                          |  |  |  |  |  |               |         |        |     |           |       |                      |    |             |         |        |        |                    |       |                          |                 |        |           |     |     |           |                    |                           |                                                                               |            |  |            |               |                            |                                                                                                                      |  |  |                                                           |  |  |  |  |  |                                                       |  |  |  |           |     |     |    |   |               |         |        |                    |                          |       |                      |           |             |        |           |               |                           |                                                                               |                     |                 |         |        |     |     |       |                      |                                      |                                                                                                                                                                                                                                                                                            |            |  |            |               |                             |                                                                                                                       |  |  |  |  |  |  |  |  |                                                                        |  |  |  |  |  |  |  |  |                                        |                                                                                                                                                                                                                                                    |
| <b>6.4.1 Baseline blood eosinophils &lt;300 cells/μL</b>                                                                                                                                                                                                                           |                                                                                                                                                                                                                                                                                                                                                 |                                                                                                                                                                                                                                                                                                                                                                                                                                                                                                                                                                                                                                                                                                                                                                                                                                                                                                                                                                                                                                                                                                                                                                                                                                                                                                                                                                                                                                                                                                                                                                                                                                                                                                                                                                                                                                                                                                                                                                                                                                                                                                                                                                                |           |            |               |                             |                            |                                      |                                            |                                            |  |        |                                            |                                            |                                      |      |       |       |                                                          |    |       |                                                          |  |  |  |  |  |               |         |        |     |           |       |                      |    |             |         |        |        |                    |       |                          |                 |        |           |     |     |           |                    |                           |                                                                               |            |  |            |               |                            |                                                                                                                      |  |  |                                                           |  |  |  |  |  |                                                       |  |  |  |           |     |     |    |   |               |         |        |                    |                          |       |                      |           |             |        |           |               |                           |                                                                               |                     |                 |         |        |     |     |       |                      |                                      |                                                                                                                                                                                                                                                                                            |            |  |            |               |                             |                                                                                                                       |  |  |  |  |  |  |  |  |                                                                        |  |  |  |  |  |  |  |  |                                        |                                                                                                                                                                                                                                                    |
| Bleecker 2016                                                                                                                                                                                                                                                                      | -0.2485                                                                                                                                                                                                                                                                                                                                         | 0.1232                                                                                                                                                                                                                                                                                                                                                                                                                                                                                                                                                                                                                                                                                                                                                                                                                                                                                                                                                                                                                                                                                                                                                                                                                                                                                                                                                                                                                                                                                                                                                                                                                                                                                                                                                                                                                                                                                                                                                                                                                                                                                                                                                                         | 127       | 139        | 45.1%         | -0.25 [-0.49, -0.01]        |                            |                                      |                                            |                                            |  |        |                                            |                                            |                                      |      |       |       |                                                          |    |       |                                                          |  |  |  |  |  |               |         |        |     |           |       |                      |    |             |         |        |        |                    |       |                          |                 |        |           |     |     |           |                    |                           |                                                                               |            |  |            |               |                            |                                                                                                                      |  |  |                                                           |  |  |  |  |  |                                                       |  |  |  |           |     |     |    |   |               |         |        |                    |                          |       |                      |           |             |        |           |               |                           |                                                                               |                     |                 |         |        |     |     |       |                      |                                      |                                                                                                                                                                                                                                                                                            |            |  |            |               |                             |                                                                                                                       |  |  |  |  |  |  |  |  |                                                                        |  |  |  |  |  |  |  |  |                                        |                                                                                                                                                                                                                                                    |
| Castro 2014                                                                                                                                                                                                                                                                        | -0.7267                                                                                                                                                                                                                                                                                                                                         | 0.4003                                                                                                                                                                                                                                                                                                                                                                                                                                                                                                                                                                                                                                                                                                                                                                                                                                                                                                                                                                                                                                                                                                                                                                                                                                                                                                                                                                                                                                                                                                                                                                                                                                                                                                                                                                                                                                                                                                                                                                                                                                                                                                                                                                         | 7         | 72         | 10.9%         | -0.73 [-1.51, 0.06]         |                            |                                      |                                            |                                            |  |        |                                            |                                            |                                      |      |       |       |                                                          |    |       |                                                          |  |  |  |  |  |               |         |        |     |           |       |                      |    |             |         |        |        |                    |       |                          |                 |        |           |     |     |           |                    |                           |                                                                               |            |  |            |               |                            |                                                                                                                      |  |  |                                                           |  |  |  |  |  |                                                       |  |  |  |           |     |     |    |   |               |         |        |                    |                          |       |                      |           |             |        |           |               |                           |                                                                               |                     |                 |         |        |     |     |       |                      |                                      |                                                                                                                                                                                                                                                                                            |            |  |            |               |                             |                                                                                                                       |  |  |  |  |  |  |  |  |                                                                        |  |  |  |  |  |  |  |  |                                        |                                                                                                                                                                                                                                                    |
| Fitzgerald 2016                                                                                                                                                                                                                                                                    | 0.0086                                                                                                                                                                                                                                                                                                                                          | 0.1275                                                                                                                                                                                                                                                                                                                                                                                                                                                                                                                                                                                                                                                                                                                                                                                                                                                                                                                                                                                                                                                                                                                                                                                                                                                                                                                                                                                                                                                                                                                                                                                                                                                                                                                                                                                                                                                                                                                                                                                                                                                                                                                                                                         | 124       | 122        | 44.0%         | 0.01 [-0.24, 0.26]          |                            |                                      |                                            |                                            |  |        |                                            |                                            |                                      |      |       |       |                                                          |    |       |                                                          |  |  |  |  |  |               |         |        |     |           |       |                      |    |             |         |        |        |                    |       |                          |                 |        |           |     |     |           |                    |                           |                                                                               |            |  |            |               |                            |                                                                                                                      |  |  |                                                           |  |  |  |  |  |                                                       |  |  |  |           |     |     |    |   |               |         |        |                    |                          |       |                      |           |             |        |           |               |                           |                                                                               |                     |                 |         |        |     |     |       |                      |                                      |                                                                                                                                                                                                                                                                                            |            |  |            |               |                             |                                                                                                                       |  |  |  |  |  |  |  |  |                                                                        |  |  |  |  |  |  |  |  |                                        |                                                                                                                                                                                                                                                    |
| <b>Subtotal (95% CI)</b>                                                                                                                                                                                                                                                           |                                                                                                                                                                                                                                                                                                                                                 | <b>258</b>                                                                                                                                                                                                                                                                                                                                                                                                                                                                                                                                                                                                                                                                                                                                                                                                                                                                                                                                                                                                                                                                                                                                                                                                                                                                                                                                                                                                                                                                                                                                                                                                                                                                                                                                                                                                                                                                                                                                                                                                                                                                                                                                                                     |           | <b>333</b> | <b>100.0%</b> | <b>-0.19 [-0.47, 0.10]</b>  |                            |                                      |                                            |                                            |  |        |                                            |                                            |                                      |      |       |       |                                                          |    |       |                                                          |  |  |  |  |  |               |         |        |     |           |       |                      |    |             |         |        |        |                    |       |                          |                 |        |           |     |     |           |                    |                           |                                                                               |            |  |            |               |                            |                                                                                                                      |  |  |                                                           |  |  |  |  |  |                                                       |  |  |  |           |     |     |    |   |               |         |        |                    |                          |       |                      |           |             |        |           |               |                           |                                                                               |                     |                 |         |        |     |     |       |                      |                                      |                                                                                                                                                                                                                                                                                            |            |  |            |               |                             |                                                                                                                       |  |  |  |  |  |  |  |  |                                                                        |  |  |  |  |  |  |  |  |                                        |                                                                                                                                                                                                                                                    |
| Heterogeneity: Tau² = 0.03; Chi² = 4.26, df = 2 (P = 0.12), I² = 53%<br>Test for overall effect: Z = 1.30 (P = 0.19)                                                                                                                                                               |                                                                                                                                                                                                                                                                                                                                                 |                                                                                                                                                                                                                                                                                                                                                                                                                                                                                                                                                                                                                                                                                                                                                                                                                                                                                                                                                                                                                                                                                                                                                                                                                                                                                                                                                                                                                                                                                                                                                                                                                                                                                                                                                                                                                                                                                                                                                                                                                                                                                                                                                                                |           |            |               |                             |                            |                                      |                                            |                                            |  |        |                                            |                                            |                                      |      |       |       |                                                          |    |       |                                                          |  |  |  |  |  |               |         |        |     |           |       |                      |    |             |         |        |        |                    |       |                          |                 |        |           |     |     |           |                    |                           |                                                                               |            |  |            |               |                            |                                                                                                                      |  |  |                                                           |  |  |  |  |  |                                                       |  |  |  |           |     |     |    |   |               |         |        |                    |                          |       |                      |           |             |        |           |               |                           |                                                                               |                     |                 |         |        |     |     |       |                      |                                      |                                                                                                                                                                                                                                                                                            |            |  |            |               |                             |                                                                                                                       |  |  |  |  |  |  |  |  |                                                                        |  |  |  |  |  |  |  |  |                                        |                                                                                                                                                                                                                                                    |
| <b>6.4.2 Baseline blood eosinophils ≥300 cells/μL</b>                                                                                                                                                                                                                              |                                                                                                                                                                                                                                                                                                                                                 |                                                                                                                                                                                                                                                                                                                                                                                                                                                                                                                                                                                                                                                                                                                                                                                                                                                                                                                                                                                                                                                                                                                                                                                                                                                                                                                                                                                                                                                                                                                                                                                                                                                                                                                                                                                                                                                                                                                                                                                                                                                                                                                                                                                |           |            |               |                             |                            |                                      |                                            |                                            |  |        |                                            |                                            |                                      |      |       |       |                                                          |    |       |                                                          |  |  |  |  |  |               |         |        |     |           |       |                      |    |             |         |        |        |                    |       |                          |                 |        |           |     |     |           |                    |                           |                                                                               |            |  |            |               |                            |                                                                                                                      |  |  |                                                           |  |  |  |  |  |                                                       |  |  |  |           |     |     |    |   |               |         |        |                    |                          |       |                      |           |             |        |           |               |                           |                                                                               |                     |                 |         |        |     |     |       |                      |                                      |                                                                                                                                                                                                                                                                                            |            |  |            |               |                             |                                                                                                                       |  |  |  |  |  |  |  |  |                                                                        |  |  |  |  |  |  |  |  |                                        |                                                                                                                                                                                                                                                    |
| Bleecker 2016                                                                                                                                                                                                                                                                      | -0.2125                                                                                                                                                                                                                                                                                                                                         | 0.0871                                                                                                                                                                                                                                                                                                                                                                                                                                                                                                                                                                                                                                                                                                                                                                                                                                                                                                                                                                                                                                                                                                                                                                                                                                                                                                                                                                                                                                                                                                                                                                                                                                                                                                                                                                                                                                                                                                                                                                                                                                                                                                                                                                         | 263       | 267        | 48.9%         | -0.21 [-0.38, -0.04]        |                            |                                      |                                            |                                            |  |        |                                            |                                            |                                      |      |       |       |                                                          |    |       |                                                          |  |  |  |  |  |               |         |        |     |           |       |                      |    |             |         |        |        |                    |       |                          |                 |        |           |     |     |           |                    |                           |                                                                               |            |  |            |               |                            |                                                                                                                      |  |  |                                                           |  |  |  |  |  |                                                       |  |  |  |           |     |     |    |   |               |         |        |                    |                          |       |                      |           |             |        |           |               |                           |                                                                               |                     |                 |         |        |     |     |       |                      |                                      |                                                                                                                                                                                                                                                                                            |            |  |            |               |                             |                                                                                                                       |  |  |  |  |  |  |  |  |                                                                        |  |  |  |  |  |  |  |  |                                        |                                                                                                                                                                                                                                                    |
| Castro 2014                                                                                                                                                                                                                                                                        | -0.096                                                                                                                                                                                                                                                                                                                                          | 0.2387                                                                                                                                                                                                                                                                                                                                                                                                                                                                                                                                                                                                                                                                                                                                                                                                                                                                                                                                                                                                                                                                                                                                                                                                                                                                                                                                                                                                                                                                                                                                                                                                                                                                                                                                                                                                                                                                                                                                                                                                                                                                                                                                                                         | 32        | 39         | 6.5%          | -0.10 [-0.56, 0.37]         |                            |                                      |                                            |                                            |  |        |                                            |                                            |                                      |      |       |       |                                                          |    |       |                                                          |  |  |  |  |  |               |         |        |     |           |       |                      |    |             |         |        |        |                    |       |                          |                 |        |           |     |     |           |                    |                           |                                                                               |            |  |            |               |                            |                                                                                                                      |  |  |                                                           |  |  |  |  |  |                                                       |  |  |  |           |     |     |    |   |               |         |        |                    |                          |       |                      |           |             |        |           |               |                           |                                                                               |                     |                 |         |        |     |     |       |                      |                                      |                                                                                                                                                                                                                                                                                            |            |  |            |               |                             |                                                                                                                       |  |  |  |  |  |  |  |  |                                                                        |  |  |  |  |  |  |  |  |                                        |                                                                                                                                                                                                                                                    |
| Fitzgerald 2016                                                                                                                                                                                                                                                                    | -0.2046                                                                                                                                                                                                                                                                                                                                         | 0.0912                                                                                                                                                                                                                                                                                                                                                                                                                                                                                                                                                                                                                                                                                                                                                                                                                                                                                                                                                                                                                                                                                                                                                                                                                                                                                                                                                                                                                                                                                                                                                                                                                                                                                                                                                                                                                                                                                                                                                                                                                                                                                                                                                                         | 237       | 247        | 44.6%         | -0.20 [-0.38, -0.03]        |                            |                                      |                                            |                                            |  |        |                                            |                                            |                                      |      |       |       |                                                          |    |       |                                                          |  |  |  |  |  |               |         |        |     |           |       |                      |    |             |         |        |        |                    |       |                          |                 |        |           |     |     |           |                    |                           |                                                                               |            |  |            |               |                            |                                                                                                                      |  |  |                                                           |  |  |  |  |  |                                                       |  |  |  |           |     |     |    |   |               |         |        |                    |                          |       |                      |           |             |        |           |               |                           |                                                                               |                     |                 |         |        |     |     |       |                      |                                      |                                                                                                                                                                                                                                                                                            |            |  |            |               |                             |                                                                                                                       |  |  |  |  |  |  |  |  |                                                                        |  |  |  |  |  |  |  |  |                                        |                                                                                                                                                                                                                                                    |
| <b>Subtotal (95% CI)</b>                                                                                                                                                                                                                                                           |                                                                                                                                                                                                                                                                                                                                                 | <b>532</b>                                                                                                                                                                                                                                                                                                                                                                                                                                                                                                                                                                                                                                                                                                                                                                                                                                                                                                                                                                                                                                                                                                                                                                                                                                                                                                                                                                                                                                                                                                                                                                                                                                                                                                                                                                                                                                                                                                                                                                                                                                                                                                                                                                     |           | <b>553</b> | <b>100.0%</b> | <b>-0.20 [-0.32, -0.08]</b> |                            |                                      |                                            |                                            |  |        |                                            |                                            |                                      |      |       |       |                                                          |    |       |                                                          |  |  |  |  |  |               |         |        |     |           |       |                      |    |             |         |        |        |                    |       |                          |                 |        |           |     |     |           |                    |                           |                                                                               |            |  |            |               |                            |                                                                                                                      |  |  |                                                           |  |  |  |  |  |                                                       |  |  |  |           |     |     |    |   |               |         |        |                    |                          |       |                      |           |             |        |           |               |                           |                                                                               |                     |                 |         |        |     |     |       |                      |                                      |                                                                                                                                                                                                                                                                                            |            |  |            |               |                             |                                                                                                                       |  |  |  |  |  |  |  |  |                                                                        |  |  |  |  |  |  |  |  |                                        |                                                                                                                                                                                                                                                    |
| Heterogeneity: Tau² = 0.00; Chi² = 0.21, df = 2 (P = 0.90), I² = 0%<br>Test for overall effect: Z = 3.31 (P = 0.0009)                                                                                                                                                              |                                                                                                                                                                                                                                                                                                                                                 |                                                                                                                                                                                                                                                                                                                                                                                                                                                                                                                                                                                                                                                                                                                                                                                                                                                                                                                                                                                                                                                                                                                                                                                                                                                                                                                                                                                                                                                                                                                                                                                                                                                                                                                                                                                                                                                                                                                                                                                                                                                                                                                                                                                |           |            |               |                             |                            |                                      |                                            |                                            |  |        |                                            |                                            |                                      |      |       |       |                                                          |    |       |                                                          |  |  |  |  |  |               |         |        |     |           |       |                      |    |             |         |        |        |                    |       |                          |                 |        |           |     |     |           |                    |                           |                                                                               |            |  |            |               |                            |                                                                                                                      |  |  |                                                           |  |  |  |  |  |                                                       |  |  |  |           |     |     |    |   |               |         |        |                    |                          |       |                      |           |             |        |           |               |                           |                                                                               |                     |                 |         |        |     |     |       |                      |                                      |                                                                                                                                                                                                                                                                                            |            |  |            |               |                             |                                                                                                                       |  |  |  |  |  |  |  |  |                                                                        |  |  |  |  |  |  |  |  |                                        |                                                                                                                                                                                                                                                    |
| Test for subgroup differences: Chi² = 0.01, df = 1 (P = 0.93), I² = 0%                                                                                                                                                                                                             |                                                                                                                                                                                                                                                                                                                                                 |                                                                                                                                                                                                                                                                                                                                                                                                                                                                                                                                                                                                                                                                                                                                                                                                                                                                                                                                                                                                                                                                                                                                                                                                                                                                                                                                                                                                                                                                                                                                                                                                                                                                                                                                                                                                                                                                                                                                                                                                                                                                                                                                                                                |           |            |               |                             |                            |                                      |                                            |                                            |  |        |                                            |                                            |                                      |      |       |       |                                                          |    |       |                                                          |  |  |  |  |  |               |         |        |     |           |       |                      |    |             |         |        |        |                    |       |                          |                 |        |           |     |     |           |                    |                           |                                                                               |            |  |            |               |                            |                                                                                                                      |  |  |                                                           |  |  |  |  |  |                                                       |  |  |  |           |     |     |    |   |               |         |        |                    |                          |       |                      |           |             |        |           |               |                           |                                                                               |                     |                 |         |        |     |     |       |                      |                                      |                                                                                                                                                                                                                                                                                            |            |  |            |               |                             |                                                                                                                       |  |  |  |  |  |  |  |  |                                                                        |  |  |  |  |  |  |  |  |                                        |                                                                                                                                                                                                                                                    |

| Outcome<br>№ of participants<br>(studies)                                                                                                                                                                     | Relative effect<br>(95% CI)                                                                                                                                                                                                                                                                                                          | Anticipated absolute effects (95% CI)                                                                                                                                                                                                                                                                                                                                                                                                                                                                                                                                                                                                                                                                                                                                                                                                                                                                                                                                                                                                                                                                                                                                                                                                                                                                                                                                                                                                                                                                                                                                                                                                                                                                                                                                                                                                                                                                                                                                                                                                                                                                                                                                                                                                                                                                                                                                                                           |              |            |            | Certainty         | What happens    |                                      |                                      |                                       |                                       |  |        |                                       |                                       |       |       |       |       |                                                          |       |                                                          |  |  |  |  |  |  |  |               |       |           |     |      |    |     |       |                   |        |                      |      |                          |  |    |           |    |      |                    |                 |                             |                                                                               |  |     |  |     |       |                     |                          |  |  |                                                       |            |  |            |               |                           |                                                                                                                                                          |  |  |  |           |     |      |    |      |      |                                                       |        |                       |                          |  |  |           |  |  |           |               |                              |                                                                               |  |     |  |     |       |                   |  |             |      |                                         |                                                                                                                                                                                                                                                                     |    |  |    |      |                   |                 |       |        |  |     |  |     |       |                   |                          |  |  |  |            |  |            |               |                          |                                                                                                                                                            |  |  |  |  |  |  |  |  |  |                                                                                                   |  |  |  |  |  |  |  |  |  |                                |                                                                                                                                                                                                                                                                                                                                   |
|---------------------------------------------------------------------------------------------------------------------------------------------------------------------------------------------------------------|--------------------------------------------------------------------------------------------------------------------------------------------------------------------------------------------------------------------------------------------------------------------------------------------------------------------------------------|-----------------------------------------------------------------------------------------------------------------------------------------------------------------------------------------------------------------------------------------------------------------------------------------------------------------------------------------------------------------------------------------------------------------------------------------------------------------------------------------------------------------------------------------------------------------------------------------------------------------------------------------------------------------------------------------------------------------------------------------------------------------------------------------------------------------------------------------------------------------------------------------------------------------------------------------------------------------------------------------------------------------------------------------------------------------------------------------------------------------------------------------------------------------------------------------------------------------------------------------------------------------------------------------------------------------------------------------------------------------------------------------------------------------------------------------------------------------------------------------------------------------------------------------------------------------------------------------------------------------------------------------------------------------------------------------------------------------------------------------------------------------------------------------------------------------------------------------------------------------------------------------------------------------------------------------------------------------------------------------------------------------------------------------------------------------------------------------------------------------------------------------------------------------------------------------------------------------------------------------------------------------------------------------------------------------------------------------------------------------------------------------------------------------|--------------|------------|------------|-------------------|-----------------|--------------------------------------|--------------------------------------|---------------------------------------|---------------------------------------|--|--------|---------------------------------------|---------------------------------------|-------|-------|-------|-------|----------------------------------------------------------|-------|----------------------------------------------------------|--|--|--|--|--|--|--|---------------|-------|-----------|-----|------|----|-----|-------|-------------------|--------|----------------------|------|--------------------------|--|----|-----------|----|------|--------------------|-----------------|-----------------------------|-------------------------------------------------------------------------------|--|-----|--|-----|-------|---------------------|--------------------------|--|--|-------------------------------------------------------|------------|--|------------|---------------|---------------------------|----------------------------------------------------------------------------------------------------------------------------------------------------------|--|--|--|-----------|-----|------|----|------|------|-------------------------------------------------------|--------|-----------------------|--------------------------|--|--|-----------|--|--|-----------|---------------|------------------------------|-------------------------------------------------------------------------------|--|-----|--|-----|-------|-------------------|--|-------------|------|-----------------------------------------|---------------------------------------------------------------------------------------------------------------------------------------------------------------------------------------------------------------------------------------------------------------------|----|--|----|------|-------------------|-----------------|-------|--------|--|-----|--|-----|-------|-------------------|--------------------------|--|--|--|------------|--|------------|---------------|--------------------------|------------------------------------------------------------------------------------------------------------------------------------------------------------|--|--|--|--|--|--|--|--|--|---------------------------------------------------------------------------------------------------|--|--|--|--|--|--|--|--|--|--------------------------------|-----------------------------------------------------------------------------------------------------------------------------------------------------------------------------------------------------------------------------------------------------------------------------------------------------------------------------------|
|                                                                                                                                                                                                               |                                                                                                                                                                                                                                                                                                                                      |                                                                                                                                                                                                                                                                                                                                                                                                                                                                                                                                                                                                                                                                                                                                                                                                                                                                                                                                                                                                                                                                                                                                                                                                                                                                                                                                                                                                                                                                                                                                                                                                                                                                                                                                                                                                                                                                                                                                                                                                                                                                                                                                                                                                                                                                                                                                                                                                                 |              |            | Difference |                   |                 |                                      |                                      |                                       |                                       |  |        |                                       |                                       |       |       |       |       |                                                          |       |                                                          |  |  |  |  |  |  |  |               |       |           |     |      |    |     |       |                   |        |                      |      |                          |  |    |           |    |      |                    |                 |                             |                                                                               |  |     |  |     |       |                     |                          |  |  |                                                       |            |  |            |               |                           |                                                                                                                                                          |  |  |  |           |     |      |    |      |      |                                                       |        |                       |                          |  |  |           |  |  |           |               |                              |                                                                               |  |     |  |     |       |                   |  |             |      |                                         |                                                                                                                                                                                                                                                                     |    |  |    |      |                   |                 |       |        |  |     |  |     |       |                   |                          |  |  |  |            |  |            |               |                          |                                                                                                                                                            |  |  |  |  |  |  |  |  |  |                                                                                                   |  |  |  |  |  |  |  |  |  |                                |                                                                                                                                                                                                                                                                                                                                   |
| <b>Lung function (FEV1% of predicted)<sup>j</sup></b><br>follow up: 52 weeks<br>MCID 10.38% <sup>6</sup><br>№ of participants: 40<br>(1 RCT) <sup>4</sup><br><br>Importance: IMPORTANT                        | Mean FEV1% of predicted at week 52 in patients treated with benralizumab compared to placebo were:<br>Unspecified blood eosinophil count: Mean difference (95% CI) = -5.30% (-17.63 to 7.03%), n=51; Eosinophil ≥300/μL: Mean difference (95% CI) = -4.40% (-18.97 to 10.17%), n=40.                                                 | <table><thead><tr><th rowspan="2">Study or Subgroup</th><th colspan="3">Benralizumab</th><th colspan="3">Placebo</th><th rowspan="2">Weight</th><th rowspan="2">Mean Difference<br/>IV, Fixed, 95% CI</th><th rowspan="2">Mean Difference<br/>IV, Fixed, 95% CI</th></tr><tr><th>Mean</th><th>SD</th><th>Total</th><th>Mean</th><th>SD</th><th>Total</th></tr></thead><tbody><tr><td colspan="10"><b>6.5.1 Unspecified baseline blood eosinophil count</b></td></tr><tr><td>Park 2016</td><td>6.7</td><td>22.8</td><td>25</td><td>12</td><td>22.1</td><td>26</td><td>100.0%</td><td>-5.30 [-17.63, 7.03]</td><td rowspan="2"></td></tr><tr><td><b>Subtotal (95% CI)</b></td><td></td><td></td><td><b>25</b></td><td></td><td></td><td><b>26</b></td><td><b>100.0%</b></td><td><b>-5.30 [-17.63, 7.03]</b></td></tr><tr><td colspan="10">Heterogeneity: Not applicable<br/>Test for overall effect: Z = 0.84 (P = 0.40)</td></tr><tr><td colspan="10"><b>6.5.2 Baseline blood eosinophils ≥300 cells/μL</b></td></tr><tr><td>Park 2016</td><td>9.1</td><td>24.5</td><td>19</td><td>13.5</td><td>22.3</td><td>21</td><td>100.0%</td><td>-4.40 [-18.97, 10.17]</td></tr><tr><td><b>Subtotal (95% CI)</b></td><td></td><td></td><td><b>19</b></td><td></td><td></td><td><b>21</b></td><td><b>100.0%</b></td><td><b>-4.40 [-18.97, 10.17]</b></td></tr><tr><td colspan="10">Heterogeneity: Not applicable<br/>Test for overall effect: Z = 0.59 (P = 0.55)</td></tr></tbody></table>                                                                                                                                                                                                                                                                                                                                                                                                                                                                                                                                                                                                                                                                                                                                                                                                                                                                                                                                 |              |            |            | Study or Subgroup | Benralizumab    |                                      |                                      | Placebo                               |                                       |  | Weight | Mean Difference<br>IV, Fixed, 95% CI  | Mean Difference<br>IV, Fixed, 95% CI  | Mean  | SD    | Total | Mean  | SD                                                       | Total | <b>6.5.1 Unspecified baseline blood eosinophil count</b> |  |  |  |  |  |  |  |               |       | Park 2016 | 6.7 | 22.8 | 25 | 12  | 22.1  | 26                | 100.0% | -5.30 [-17.63, 7.03] |      | <b>Subtotal (95% CI)</b> |  |    | <b>25</b> |    |      | <b>26</b>          | <b>100.0%</b>   | <b>-5.30 [-17.63, 7.03]</b> | Heterogeneity: Not applicable<br>Test for overall effect: Z = 0.84 (P = 0.40) |  |     |  |     |       |                     |                          |  |  | <b>6.5.2 Baseline blood eosinophils ≥300 cells/μL</b> |            |  |            |               |                           |                                                                                                                                                          |  |  |  | Park 2016 | 9.1 | 24.5 | 19 | 13.5 | 22.3 | 21                                                    | 100.0% | -4.40 [-18.97, 10.17] | <b>Subtotal (95% CI)</b> |  |  | <b>19</b> |  |  | <b>21</b> | <b>100.0%</b> | <b>-4.40 [-18.97, 10.17]</b> | Heterogeneity: Not applicable<br>Test for overall effect: Z = 0.59 (P = 0.55) |  |     |  |     |       |                   |  |             |      | ⊕○○○<br>○<br>VERY<br>LOW <sup>e,j</sup> | There are no significant changes in FEV1% of predicted with benralizumab compared to placebo in patients with baseline blood eosinophil counts ≥300/μL or with unspecified eosinophil counts at 52 weeks of follow up. There is appreciable overlap of the 95% CIs. |    |  |    |      |                   |                 |       |        |  |     |  |     |       |                   |                          |  |  |  |            |  |            |               |                          |                                                                                                                                                            |  |  |  |  |  |  |  |  |  |                                                                                                   |  |  |  |  |  |  |  |  |  |                                |                                                                                                                                                                                                                                                                                                                                   |
| Study or Subgroup                                                                                                                                                                                             | Benralizumab                                                                                                                                                                                                                                                                                                                         |                                                                                                                                                                                                                                                                                                                                                                                                                                                                                                                                                                                                                                                                                                                                                                                                                                                                                                                                                                                                                                                                                                                                                                                                                                                                                                                                                                                                                                                                                                                                                                                                                                                                                                                                                                                                                                                                                                                                                                                                                                                                                                                                                                                                                                                                                                                                                                                                                 |              | Placebo    |            |                   | Weight          | Mean Difference<br>IV, Fixed, 95% CI | Mean Difference<br>IV, Fixed, 95% CI |                                       |                                       |  |        |                                       |                                       |       |       |       |       |                                                          |       |                                                          |  |  |  |  |  |  |  |               |       |           |     |      |    |     |       |                   |        |                      |      |                          |  |    |           |    |      |                    |                 |                             |                                                                               |  |     |  |     |       |                     |                          |  |  |                                                       |            |  |            |               |                           |                                                                                                                                                          |  |  |  |           |     |      |    |      |      |                                                       |        |                       |                          |  |  |           |  |  |           |               |                              |                                                                               |  |     |  |     |       |                   |  |             |      |                                         |                                                                                                                                                                                                                                                                     |    |  |    |      |                   |                 |       |        |  |     |  |     |       |                   |                          |  |  |  |            |  |            |               |                          |                                                                                                                                                            |  |  |  |  |  |  |  |  |  |                                                                                                   |  |  |  |  |  |  |  |  |  |                                |                                                                                                                                                                                                                                                                                                                                   |
|                                                                                                                                                                                                               | Mean                                                                                                                                                                                                                                                                                                                                 | SD                                                                                                                                                                                                                                                                                                                                                                                                                                                                                                                                                                                                                                                                                                                                                                                                                                                                                                                                                                                                                                                                                                                                                                                                                                                                                                                                                                                                                                                                                                                                                                                                                                                                                                                                                                                                                                                                                                                                                                                                                                                                                                                                                                                                                                                                                                                                                                                                              | Total        | Mean       | SD         | Total             |                 |                                      |                                      |                                       |                                       |  |        |                                       |                                       |       |       |       |       |                                                          |       |                                                          |  |  |  |  |  |  |  |               |       |           |     |      |    |     |       |                   |        |                      |      |                          |  |    |           |    |      |                    |                 |                             |                                                                               |  |     |  |     |       |                     |                          |  |  |                                                       |            |  |            |               |                           |                                                                                                                                                          |  |  |  |           |     |      |    |      |      |                                                       |        |                       |                          |  |  |           |  |  |           |               |                              |                                                                               |  |     |  |     |       |                   |  |             |      |                                         |                                                                                                                                                                                                                                                                     |    |  |    |      |                   |                 |       |        |  |     |  |     |       |                   |                          |  |  |  |            |  |            |               |                          |                                                                                                                                                            |  |  |  |  |  |  |  |  |  |                                                                                                   |  |  |  |  |  |  |  |  |  |                                |                                                                                                                                                                                                                                                                                                                                   |
| <b>6.5.1 Unspecified baseline blood eosinophil count</b>                                                                                                                                                      |                                                                                                                                                                                                                                                                                                                                      |                                                                                                                                                                                                                                                                                                                                                                                                                                                                                                                                                                                                                                                                                                                                                                                                                                                                                                                                                                                                                                                                                                                                                                                                                                                                                                                                                                                                                                                                                                                                                                                                                                                                                                                                                                                                                                                                                                                                                                                                                                                                                                                                                                                                                                                                                                                                                                                                                 |              |            |            |                   |                 |                                      |                                      |                                       |                                       |  |        |                                       |                                       |       |       |       |       |                                                          |       |                                                          |  |  |  |  |  |  |  |               |       |           |     |      |    |     |       |                   |        |                      |      |                          |  |    |           |    |      |                    |                 |                             |                                                                               |  |     |  |     |       |                     |                          |  |  |                                                       |            |  |            |               |                           |                                                                                                                                                          |  |  |  |           |     |      |    |      |      |                                                       |        |                       |                          |  |  |           |  |  |           |               |                              |                                                                               |  |     |  |     |       |                   |  |             |      |                                         |                                                                                                                                                                                                                                                                     |    |  |    |      |                   |                 |       |        |  |     |  |     |       |                   |                          |  |  |  |            |  |            |               |                          |                                                                                                                                                            |  |  |  |  |  |  |  |  |  |                                                                                                   |  |  |  |  |  |  |  |  |  |                                |                                                                                                                                                                                                                                                                                                                                   |
| Park 2016                                                                                                                                                                                                     | 6.7                                                                                                                                                                                                                                                                                                                                  | 22.8                                                                                                                                                                                                                                                                                                                                                                                                                                                                                                                                                                                                                                                                                                                                                                                                                                                                                                                                                                                                                                                                                                                                                                                                                                                                                                                                                                                                                                                                                                                                                                                                                                                                                                                                                                                                                                                                                                                                                                                                                                                                                                                                                                                                                                                                                                                                                                                                            | 25           | 12         | 22.1       | 26                | 100.0%          | -5.30 [-17.63, 7.03]                 |                                      |                                       |                                       |  |        |                                       |                                       |       |       |       |       |                                                          |       |                                                          |  |  |  |  |  |  |  |               |       |           |     |      |    |     |       |                   |        |                      |      |                          |  |    |           |    |      |                    |                 |                             |                                                                               |  |     |  |     |       |                     |                          |  |  |                                                       |            |  |            |               |                           |                                                                                                                                                          |  |  |  |           |     |      |    |      |      |                                                       |        |                       |                          |  |  |           |  |  |           |               |                              |                                                                               |  |     |  |     |       |                   |  |             |      |                                         |                                                                                                                                                                                                                                                                     |    |  |    |      |                   |                 |       |        |  |     |  |     |       |                   |                          |  |  |  |            |  |            |               |                          |                                                                                                                                                            |  |  |  |  |  |  |  |  |  |                                                                                                   |  |  |  |  |  |  |  |  |  |                                |                                                                                                                                                                                                                                                                                                                                   |
| <b>Subtotal (95% CI)</b>                                                                                                                                                                                      |                                                                                                                                                                                                                                                                                                                                      |                                                                                                                                                                                                                                                                                                                                                                                                                                                                                                                                                                                                                                                                                                                                                                                                                                                                                                                                                                                                                                                                                                                                                                                                                                                                                                                                                                                                                                                                                                                                                                                                                                                                                                                                                                                                                                                                                                                                                                                                                                                                                                                                                                                                                                                                                                                                                                                                                 | <b>25</b>    |            |            | <b>26</b>         | <b>100.0%</b>   | <b>-5.30 [-17.63, 7.03]</b>          |                                      |                                       |                                       |  |        |                                       |                                       |       |       |       |       |                                                          |       |                                                          |  |  |  |  |  |  |  |               |       |           |     |      |    |     |       |                   |        |                      |      |                          |  |    |           |    |      |                    |                 |                             |                                                                               |  |     |  |     |       |                     |                          |  |  |                                                       |            |  |            |               |                           |                                                                                                                                                          |  |  |  |           |     |      |    |      |      |                                                       |        |                       |                          |  |  |           |  |  |           |               |                              |                                                                               |  |     |  |     |       |                   |  |             |      |                                         |                                                                                                                                                                                                                                                                     |    |  |    |      |                   |                 |       |        |  |     |  |     |       |                   |                          |  |  |  |            |  |            |               |                          |                                                                                                                                                            |  |  |  |  |  |  |  |  |  |                                                                                                   |  |  |  |  |  |  |  |  |  |                                |                                                                                                                                                                                                                                                                                                                                   |
| Heterogeneity: Not applicable<br>Test for overall effect: Z = 0.84 (P = 0.40)                                                                                                                                 |                                                                                                                                                                                                                                                                                                                                      |                                                                                                                                                                                                                                                                                                                                                                                                                                                                                                                                                                                                                                                                                                                                                                                                                                                                                                                                                                                                                                                                                                                                                                                                                                                                                                                                                                                                                                                                                                                                                                                                                                                                                                                                                                                                                                                                                                                                                                                                                                                                                                                                                                                                                                                                                                                                                                                                                 |              |            |            |                   |                 |                                      |                                      |                                       |                                       |  |        |                                       |                                       |       |       |       |       |                                                          |       |                                                          |  |  |  |  |  |  |  |               |       |           |     |      |    |     |       |                   |        |                      |      |                          |  |    |           |    |      |                    |                 |                             |                                                                               |  |     |  |     |       |                     |                          |  |  |                                                       |            |  |            |               |                           |                                                                                                                                                          |  |  |  |           |     |      |    |      |      |                                                       |        |                       |                          |  |  |           |  |  |           |               |                              |                                                                               |  |     |  |     |       |                   |  |             |      |                                         |                                                                                                                                                                                                                                                                     |    |  |    |      |                   |                 |       |        |  |     |  |     |       |                   |                          |  |  |  |            |  |            |               |                          |                                                                                                                                                            |  |  |  |  |  |  |  |  |  |                                                                                                   |  |  |  |  |  |  |  |  |  |                                |                                                                                                                                                                                                                                                                                                                                   |
| <b>6.5.2 Baseline blood eosinophils ≥300 cells/μL</b>                                                                                                                                                         |                                                                                                                                                                                                                                                                                                                                      |                                                                                                                                                                                                                                                                                                                                                                                                                                                                                                                                                                                                                                                                                                                                                                                                                                                                                                                                                                                                                                                                                                                                                                                                                                                                                                                                                                                                                                                                                                                                                                                                                                                                                                                                                                                                                                                                                                                                                                                                                                                                                                                                                                                                                                                                                                                                                                                                                 |              |            |            |                   |                 |                                      |                                      |                                       |                                       |  |        |                                       |                                       |       |       |       |       |                                                          |       |                                                          |  |  |  |  |  |  |  |               |       |           |     |      |    |     |       |                   |        |                      |      |                          |  |    |           |    |      |                    |                 |                             |                                                                               |  |     |  |     |       |                     |                          |  |  |                                                       |            |  |            |               |                           |                                                                                                                                                          |  |  |  |           |     |      |    |      |      |                                                       |        |                       |                          |  |  |           |  |  |           |               |                              |                                                                               |  |     |  |     |       |                   |  |             |      |                                         |                                                                                                                                                                                                                                                                     |    |  |    |      |                   |                 |       |        |  |     |  |     |       |                   |                          |  |  |  |            |  |            |               |                          |                                                                                                                                                            |  |  |  |  |  |  |  |  |  |                                                                                                   |  |  |  |  |  |  |  |  |  |                                |                                                                                                                                                                                                                                                                                                                                   |
| Park 2016                                                                                                                                                                                                     | 9.1                                                                                                                                                                                                                                                                                                                                  | 24.5                                                                                                                                                                                                                                                                                                                                                                                                                                                                                                                                                                                                                                                                                                                                                                                                                                                                                                                                                                                                                                                                                                                                                                                                                                                                                                                                                                                                                                                                                                                                                                                                                                                                                                                                                                                                                                                                                                                                                                                                                                                                                                                                                                                                                                                                                                                                                                                                            | 19           | 13.5       | 22.3       | 21                | 100.0%          | -4.40 [-18.97, 10.17]                |                                      |                                       |                                       |  |        |                                       |                                       |       |       |       |       |                                                          |       |                                                          |  |  |  |  |  |  |  |               |       |           |     |      |    |     |       |                   |        |                      |      |                          |  |    |           |    |      |                    |                 |                             |                                                                               |  |     |  |     |       |                     |                          |  |  |                                                       |            |  |            |               |                           |                                                                                                                                                          |  |  |  |           |     |      |    |      |      |                                                       |        |                       |                          |  |  |           |  |  |           |               |                              |                                                                               |  |     |  |     |       |                   |  |             |      |                                         |                                                                                                                                                                                                                                                                     |    |  |    |      |                   |                 |       |        |  |     |  |     |       |                   |                          |  |  |  |            |  |            |               |                          |                                                                                                                                                            |  |  |  |  |  |  |  |  |  |                                                                                                   |  |  |  |  |  |  |  |  |  |                                |                                                                                                                                                                                                                                                                                                                                   |
| <b>Subtotal (95% CI)</b>                                                                                                                                                                                      |                                                                                                                                                                                                                                                                                                                                      |                                                                                                                                                                                                                                                                                                                                                                                                                                                                                                                                                                                                                                                                                                                                                                                                                                                                                                                                                                                                                                                                                                                                                                                                                                                                                                                                                                                                                                                                                                                                                                                                                                                                                                                                                                                                                                                                                                                                                                                                                                                                                                                                                                                                                                                                                                                                                                                                                 | <b>19</b>    |            |            | <b>21</b>         | <b>100.0%</b>   | <b>-4.40 [-18.97, 10.17]</b>         |                                      |                                       |                                       |  |        |                                       |                                       |       |       |       |       |                                                          |       |                                                          |  |  |  |  |  |  |  |               |       |           |     |      |    |     |       |                   |        |                      |      |                          |  |    |           |    |      |                    |                 |                             |                                                                               |  |     |  |     |       |                     |                          |  |  |                                                       |            |  |            |               |                           |                                                                                                                                                          |  |  |  |           |     |      |    |      |      |                                                       |        |                       |                          |  |  |           |  |  |           |               |                              |                                                                               |  |     |  |     |       |                   |  |             |      |                                         |                                                                                                                                                                                                                                                                     |    |  |    |      |                   |                 |       |        |  |     |  |     |       |                   |                          |  |  |  |            |  |            |               |                          |                                                                                                                                                            |  |  |  |  |  |  |  |  |  |                                                                                                   |  |  |  |  |  |  |  |  |  |                                |                                                                                                                                                                                                                                                                                                                                   |
| Heterogeneity: Not applicable<br>Test for overall effect: Z = 0.59 (P = 0.55)                                                                                                                                 |                                                                                                                                                                                                                                                                                                                                      |                                                                                                                                                                                                                                                                                                                                                                                                                                                                                                                                                                                                                                                                                                                                                                                                                                                                                                                                                                                                                                                                                                                                                                                                                                                                                                                                                                                                                                                                                                                                                                                                                                                                                                                                                                                                                                                                                                                                                                                                                                                                                                                                                                                                                                                                                                                                                                                                                 |              |            |            |                   |                 |                                      |                                      |                                       |                                       |  |        |                                       |                                       |       |       |       |       |                                                          |       |                                                          |  |  |  |  |  |  |  |               |       |           |     |      |    |     |       |                   |        |                      |      |                          |  |    |           |    |      |                    |                 |                             |                                                                               |  |     |  |     |       |                     |                          |  |  |                                                       |            |  |            |               |                           |                                                                                                                                                          |  |  |  |           |     |      |    |      |      |                                                       |        |                       |                          |  |  |           |  |  |           |               |                              |                                                                               |  |     |  |     |       |                   |  |             |      |                                         |                                                                                                                                                                                                                                                                     |    |  |    |      |                   |                 |       |        |  |     |  |     |       |                   |                          |  |  |  |            |  |            |               |                          |                                                                                                                                                            |  |  |  |  |  |  |  |  |  |                                                                                                   |  |  |  |  |  |  |  |  |  |                                |                                                                                                                                                                                                                                                                                                                                   |
| <b>Lung function (Pre-bronchodilator FEV1 litres)</b><br>follow up: range 28 to 56 weeks;<br>MCID 0.23 litre <sup>6</sup><br>№ of participants: 611<br>(3 RCTs) <sup>1,2,3</sup><br><br>Importance: IMPORTANT | Mean change from baseline in pre-bronchodilator FEV1 (litres) in patients treated with benralizumab compared to placebo were: Eosinophil <300/μL: Mean difference (95% CI) = 0.05 L (-0.03 to 0.14 L), n=611; Eosinophil ≥300/μL: Mean difference (95% CI) = 0.15 L (0.09 to 0.21 L), n=1108. Test for subgroup differences, p=0.07. | <table><thead><tr><th rowspan="2">Study or Subgroup</th><th rowspan="2">Mean Difference</th><th rowspan="2">SE</th><th colspan="2">Benralizumab</th><th colspan="2">Placebo</th><th rowspan="2">Weight</th><th rowspan="2">Mean Difference<br/>IV, Random, 95% CI</th><th rowspan="2">Mean Difference<br/>IV, Random, 95% CI</th></tr><tr><th>Total</th><th>Total</th><th>Total</th><th>Total</th></tr></thead><tbody><tr><td colspan="10"><b>6.6.1 Baseline blood eosinophils &lt;300 cells/μL</b></td></tr><tr><td>Bleecker 2016</td><td>0.102</td><td>0.0505</td><td></td><td>129</td><td></td><td>138</td><td>49.2%</td><td>0.10 [0.00, 0.20]</td><td rowspan="4"></td></tr><tr><td>Castro 2014</td><td>0.09</td><td>0.1301</td><td></td><td>10</td><td></td><td>97</td><td>9.8%</td><td>0.09 [-0.16, 0.34]</td></tr><tr><td>FitzGerald 2016</td><td>-0.015</td><td>0.0571</td><td></td><td>121</td><td></td><td>116</td><td>41.0%</td><td>-0.01 [-0.13, 0.10]</td></tr><tr><td><b>Subtotal (95% CI)</b></td><td></td><td></td><td></td><td><b>260</b></td><td></td><td><b>351</b></td><td><b>100.0%</b></td><td><b>0.05 [-0.03, 0.14]</b></td></tr><tr><td colspan="10">Heterogeneity: Tau<sup>2</sup> = 0.00; Chi<sup>2</sup> = 2.44, df = 2 (P = 0.30); I<sup>2</sup> = 18%<br/>Test for overall effect: Z = 1.26 (P = 0.21)</td></tr><tr><td colspan="10"><b>6.6.2 Baseline blood eosinophils ≥300 cells/μL</b></td></tr><tr><td>Bleecker 2016</td><td>0.159</td><td>0.0464</td><td></td><td>264</td><td></td><td>261</td><td>43.6%</td><td>0.16 [0.07, 0.25]</td><td rowspan="3"></td></tr><tr><td>Castro 2014</td><td>0.23</td><td>0.0977</td><td></td><td>48</td><td></td><td>53</td><td>9.8%</td><td>0.23 [0.04, 0.42]</td></tr><tr><td>FitzGerald 2016</td><td>0.116</td><td>0.0449</td><td></td><td>238</td><td></td><td>244</td><td>46.6%</td><td>0.12 [0.03, 0.20]</td></tr><tr><td><b>Subtotal (95% CI)</b></td><td></td><td></td><td></td><td><b>550</b></td><td></td><td><b>558</b></td><td><b>100.0%</b></td><td><b>0.15 [0.09, 0.21]</b></td></tr><tr><td colspan="10">Heterogeneity: Tau<sup>2</sup> = 0.00; Chi<sup>2</sup> = 1.26, df = 2 (P = 0.53); I<sup>2</sup> = 0%<br/>Test for overall effect: Z = 4.76 (P &lt; 0.00001)</td></tr><tr><td colspan="10">Test for subgroup differences: Chi<sup>2</sup> = 3.21, df = 1 (P = 0.07), I<sup>2</sup> = 68.9%</td></tr></tbody></table> |              |            |            | Study or Subgroup | Mean Difference | SE                                   | Benralizumab                         |                                       | Placebo                               |  | Weight | Mean Difference<br>IV, Random, 95% CI | Mean Difference<br>IV, Random, 95% CI | Total | Total | Total | Total | <b>6.6.1 Baseline blood eosinophils &lt;300 cells/μL</b> |       |                                                          |  |  |  |  |  |  |  | Bleecker 2016 | 0.102 | 0.0505    |     | 129  |    | 138 | 49.2% | 0.10 [0.00, 0.20] |        | Castro 2014          | 0.09 | 0.1301                   |  | 10 |           | 97 | 9.8% | 0.09 [-0.16, 0.34] | FitzGerald 2016 | -0.015                      | 0.0571                                                                        |  | 121 |  | 116 | 41.0% | -0.01 [-0.13, 0.10] | <b>Subtotal (95% CI)</b> |  |  |                                                       | <b>260</b> |  | <b>351</b> | <b>100.0%</b> | <b>0.05 [-0.03, 0.14]</b> | Heterogeneity: Tau <sup>2</sup> = 0.00; Chi <sup>2</sup> = 2.44, df = 2 (P = 0.30); I <sup>2</sup> = 18%<br>Test for overall effect: Z = 1.26 (P = 0.21) |  |  |  |           |     |      |    |      |      | <b>6.6.2 Baseline blood eosinophils ≥300 cells/μL</b> |        |                       |                          |  |  |           |  |  |           | Bleecker 2016 | 0.159                        | 0.0464                                                                        |  | 264 |  | 261 | 43.6% | 0.16 [0.07, 0.25] |  | Castro 2014 | 0.23 | 0.0977                                  |                                                                                                                                                                                                                                                                     | 48 |  | 53 | 9.8% | 0.23 [0.04, 0.42] | FitzGerald 2016 | 0.116 | 0.0449 |  | 238 |  | 244 | 46.6% | 0.12 [0.03, 0.20] | <b>Subtotal (95% CI)</b> |  |  |  | <b>550</b> |  | <b>558</b> | <b>100.0%</b> | <b>0.15 [0.09, 0.21]</b> | Heterogeneity: Tau <sup>2</sup> = 0.00; Chi <sup>2</sup> = 1.26, df = 2 (P = 0.53); I <sup>2</sup> = 0%<br>Test for overall effect: Z = 4.76 (P < 0.00001) |  |  |  |  |  |  |  |  |  | Test for subgroup differences: Chi <sup>2</sup> = 3.21, df = 1 (P = 0.07), I <sup>2</sup> = 68.9% |  |  |  |  |  |  |  |  |  | ⊕⊕○<br>○<br>LOW <sup>b,g</sup> | There is a significant increase in pre-BD FEV1 (litres) with benralizumab compared to placebo in the subgroup of patients with blood eosinophil counts ≥300/uL, whereas there are no differences for those patients with blood eosinophils <300/uL. However there are no statistically significant differences between subgroups. |
| Study or Subgroup                                                                                                                                                                                             | Mean Difference                                                                                                                                                                                                                                                                                                                      | SE                                                                                                                                                                                                                                                                                                                                                                                                                                                                                                                                                                                                                                                                                                                                                                                                                                                                                                                                                                                                                                                                                                                                                                                                                                                                                                                                                                                                                                                                                                                                                                                                                                                                                                                                                                                                                                                                                                                                                                                                                                                                                                                                                                                                                                                                                                                                                                                                              | Benralizumab |            | Placebo    |                   |                 |                                      | Weight                               | Mean Difference<br>IV, Random, 95% CI | Mean Difference<br>IV, Random, 95% CI |  |        |                                       |                                       |       |       |       |       |                                                          |       |                                                          |  |  |  |  |  |  |  |               |       |           |     |      |    |     |       |                   |        |                      |      |                          |  |    |           |    |      |                    |                 |                             |                                                                               |  |     |  |     |       |                     |                          |  |  |                                                       |            |  |            |               |                           |                                                                                                                                                          |  |  |  |           |     |      |    |      |      |                                                       |        |                       |                          |  |  |           |  |  |           |               |                              |                                                                               |  |     |  |     |       |                   |  |             |      |                                         |                                                                                                                                                                                                                                                                     |    |  |    |      |                   |                 |       |        |  |     |  |     |       |                   |                          |  |  |  |            |  |            |               |                          |                                                                                                                                                            |  |  |  |  |  |  |  |  |  |                                                                                                   |  |  |  |  |  |  |  |  |  |                                |                                                                                                                                                                                                                                                                                                                                   |
|                                                                                                                                                                                                               |                                                                                                                                                                                                                                                                                                                                      |                                                                                                                                                                                                                                                                                                                                                                                                                                                                                                                                                                                                                                                                                                                                                                                                                                                                                                                                                                                                                                                                                                                                                                                                                                                                                                                                                                                                                                                                                                                                                                                                                                                                                                                                                                                                                                                                                                                                                                                                                                                                                                                                                                                                                                                                                                                                                                                                                 | Total        | Total      | Total      | Total             |                 |                                      |                                      |                                       |                                       |  |        |                                       |                                       |       |       |       |       |                                                          |       |                                                          |  |  |  |  |  |  |  |               |       |           |     |      |    |     |       |                   |        |                      |      |                          |  |    |           |    |      |                    |                 |                             |                                                                               |  |     |  |     |       |                     |                          |  |  |                                                       |            |  |            |               |                           |                                                                                                                                                          |  |  |  |           |     |      |    |      |      |                                                       |        |                       |                          |  |  |           |  |  |           |               |                              |                                                                               |  |     |  |     |       |                   |  |             |      |                                         |                                                                                                                                                                                                                                                                     |    |  |    |      |                   |                 |       |        |  |     |  |     |       |                   |                          |  |  |  |            |  |            |               |                          |                                                                                                                                                            |  |  |  |  |  |  |  |  |  |                                                                                                   |  |  |  |  |  |  |  |  |  |                                |                                                                                                                                                                                                                                                                                                                                   |
| <b>6.6.1 Baseline blood eosinophils &lt;300 cells/μL</b>                                                                                                                                                      |                                                                                                                                                                                                                                                                                                                                      |                                                                                                                                                                                                                                                                                                                                                                                                                                                                                                                                                                                                                                                                                                                                                                                                                                                                                                                                                                                                                                                                                                                                                                                                                                                                                                                                                                                                                                                                                                                                                                                                                                                                                                                                                                                                                                                                                                                                                                                                                                                                                                                                                                                                                                                                                                                                                                                                                 |              |            |            |                   |                 |                                      |                                      |                                       |                                       |  |        |                                       |                                       |       |       |       |       |                                                          |       |                                                          |  |  |  |  |  |  |  |               |       |           |     |      |    |     |       |                   |        |                      |      |                          |  |    |           |    |      |                    |                 |                             |                                                                               |  |     |  |     |       |                     |                          |  |  |                                                       |            |  |            |               |                           |                                                                                                                                                          |  |  |  |           |     |      |    |      |      |                                                       |        |                       |                          |  |  |           |  |  |           |               |                              |                                                                               |  |     |  |     |       |                   |  |             |      |                                         |                                                                                                                                                                                                                                                                     |    |  |    |      |                   |                 |       |        |  |     |  |     |       |                   |                          |  |  |  |            |  |            |               |                          |                                                                                                                                                            |  |  |  |  |  |  |  |  |  |                                                                                                   |  |  |  |  |  |  |  |  |  |                                |                                                                                                                                                                                                                                                                                                                                   |
| Bleecker 2016                                                                                                                                                                                                 | 0.102                                                                                                                                                                                                                                                                                                                                | 0.0505                                                                                                                                                                                                                                                                                                                                                                                                                                                                                                                                                                                                                                                                                                                                                                                                                                                                                                                                                                                                                                                                                                                                                                                                                                                                                                                                                                                                                                                                                                                                                                                                                                                                                                                                                                                                                                                                                                                                                                                                                                                                                                                                                                                                                                                                                                                                                                                                          |              | 129        |            | 138               | 49.2%           | 0.10 [0.00, 0.20]                    |                                      |                                       |                                       |  |        |                                       |                                       |       |       |       |       |                                                          |       |                                                          |  |  |  |  |  |  |  |               |       |           |     |      |    |     |       |                   |        |                      |      |                          |  |    |           |    |      |                    |                 |                             |                                                                               |  |     |  |     |       |                     |                          |  |  |                                                       |            |  |            |               |                           |                                                                                                                                                          |  |  |  |           |     |      |    |      |      |                                                       |        |                       |                          |  |  |           |  |  |           |               |                              |                                                                               |  |     |  |     |       |                   |  |             |      |                                         |                                                                                                                                                                                                                                                                     |    |  |    |      |                   |                 |       |        |  |     |  |     |       |                   |                          |  |  |  |            |  |            |               |                          |                                                                                                                                                            |  |  |  |  |  |  |  |  |  |                                                                                                   |  |  |  |  |  |  |  |  |  |                                |                                                                                                                                                                                                                                                                                                                                   |
| Castro 2014                                                                                                                                                                                                   | 0.09                                                                                                                                                                                                                                                                                                                                 | 0.1301                                                                                                                                                                                                                                                                                                                                                                                                                                                                                                                                                                                                                                                                                                                                                                                                                                                                                                                                                                                                                                                                                                                                                                                                                                                                                                                                                                                                                                                                                                                                                                                                                                                                                                                                                                                                                                                                                                                                                                                                                                                                                                                                                                                                                                                                                                                                                                                                          |              | 10         |            | 97                | 9.8%            | 0.09 [-0.16, 0.34]                   |                                      |                                       |                                       |  |        |                                       |                                       |       |       |       |       |                                                          |       |                                                          |  |  |  |  |  |  |  |               |       |           |     |      |    |     |       |                   |        |                      |      |                          |  |    |           |    |      |                    |                 |                             |                                                                               |  |     |  |     |       |                     |                          |  |  |                                                       |            |  |            |               |                           |                                                                                                                                                          |  |  |  |           |     |      |    |      |      |                                                       |        |                       |                          |  |  |           |  |  |           |               |                              |                                                                               |  |     |  |     |       |                   |  |             |      |                                         |                                                                                                                                                                                                                                                                     |    |  |    |      |                   |                 |       |        |  |     |  |     |       |                   |                          |  |  |  |            |  |            |               |                          |                                                                                                                                                            |  |  |  |  |  |  |  |  |  |                                                                                                   |  |  |  |  |  |  |  |  |  |                                |                                                                                                                                                                                                                                                                                                                                   |
| FitzGerald 2016                                                                                                                                                                                               | -0.015                                                                                                                                                                                                                                                                                                                               | 0.0571                                                                                                                                                                                                                                                                                                                                                                                                                                                                                                                                                                                                                                                                                                                                                                                                                                                                                                                                                                                                                                                                                                                                                                                                                                                                                                                                                                                                                                                                                                                                                                                                                                                                                                                                                                                                                                                                                                                                                                                                                                                                                                                                                                                                                                                                                                                                                                                                          |              | 121        |            | 116               | 41.0%           | -0.01 [-0.13, 0.10]                  |                                      |                                       |                                       |  |        |                                       |                                       |       |       |       |       |                                                          |       |                                                          |  |  |  |  |  |  |  |               |       |           |     |      |    |     |       |                   |        |                      |      |                          |  |    |           |    |      |                    |                 |                             |                                                                               |  |     |  |     |       |                     |                          |  |  |                                                       |            |  |            |               |                           |                                                                                                                                                          |  |  |  |           |     |      |    |      |      |                                                       |        |                       |                          |  |  |           |  |  |           |               |                              |                                                                               |  |     |  |     |       |                   |  |             |      |                                         |                                                                                                                                                                                                                                                                     |    |  |    |      |                   |                 |       |        |  |     |  |     |       |                   |                          |  |  |  |            |  |            |               |                          |                                                                                                                                                            |  |  |  |  |  |  |  |  |  |                                                                                                   |  |  |  |  |  |  |  |  |  |                                |                                                                                                                                                                                                                                                                                                                                   |
| <b>Subtotal (95% CI)</b>                                                                                                                                                                                      |                                                                                                                                                                                                                                                                                                                                      |                                                                                                                                                                                                                                                                                                                                                                                                                                                                                                                                                                                                                                                                                                                                                                                                                                                                                                                                                                                                                                                                                                                                                                                                                                                                                                                                                                                                                                                                                                                                                                                                                                                                                                                                                                                                                                                                                                                                                                                                                                                                                                                                                                                                                                                                                                                                                                                                                 |              | <b>260</b> |            | <b>351</b>        | <b>100.0%</b>   | <b>0.05 [-0.03, 0.14]</b>            |                                      |                                       |                                       |  |        |                                       |                                       |       |       |       |       |                                                          |       |                                                          |  |  |  |  |  |  |  |               |       |           |     |      |    |     |       |                   |        |                      |      |                          |  |    |           |    |      |                    |                 |                             |                                                                               |  |     |  |     |       |                     |                          |  |  |                                                       |            |  |            |               |                           |                                                                                                                                                          |  |  |  |           |     |      |    |      |      |                                                       |        |                       |                          |  |  |           |  |  |           |               |                              |                                                                               |  |     |  |     |       |                   |  |             |      |                                         |                                                                                                                                                                                                                                                                     |    |  |    |      |                   |                 |       |        |  |     |  |     |       |                   |                          |  |  |  |            |  |            |               |                          |                                                                                                                                                            |  |  |  |  |  |  |  |  |  |                                                                                                   |  |  |  |  |  |  |  |  |  |                                |                                                                                                                                                                                                                                                                                                                                   |
| Heterogeneity: Tau <sup>2</sup> = 0.00; Chi <sup>2</sup> = 2.44, df = 2 (P = 0.30); I <sup>2</sup> = 18%<br>Test for overall effect: Z = 1.26 (P = 0.21)                                                      |                                                                                                                                                                                                                                                                                                                                      |                                                                                                                                                                                                                                                                                                                                                                                                                                                                                                                                                                                                                                                                                                                                                                                                                                                                                                                                                                                                                                                                                                                                                                                                                                                                                                                                                                                                                                                                                                                                                                                                                                                                                                                                                                                                                                                                                                                                                                                                                                                                                                                                                                                                                                                                                                                                                                                                                 |              |            |            |                   |                 |                                      |                                      |                                       |                                       |  |        |                                       |                                       |       |       |       |       |                                                          |       |                                                          |  |  |  |  |  |  |  |               |       |           |     |      |    |     |       |                   |        |                      |      |                          |  |    |           |    |      |                    |                 |                             |                                                                               |  |     |  |     |       |                     |                          |  |  |                                                       |            |  |            |               |                           |                                                                                                                                                          |  |  |  |           |     |      |    |      |      |                                                       |        |                       |                          |  |  |           |  |  |           |               |                              |                                                                               |  |     |  |     |       |                   |  |             |      |                                         |                                                                                                                                                                                                                                                                     |    |  |    |      |                   |                 |       |        |  |     |  |     |       |                   |                          |  |  |  |            |  |            |               |                          |                                                                                                                                                            |  |  |  |  |  |  |  |  |  |                                                                                                   |  |  |  |  |  |  |  |  |  |                                |                                                                                                                                                                                                                                                                                                                                   |
| <b>6.6.2 Baseline blood eosinophils ≥300 cells/μL</b>                                                                                                                                                         |                                                                                                                                                                                                                                                                                                                                      |                                                                                                                                                                                                                                                                                                                                                                                                                                                                                                                                                                                                                                                                                                                                                                                                                                                                                                                                                                                                                                                                                                                                                                                                                                                                                                                                                                                                                                                                                                                                                                                                                                                                                                                                                                                                                                                                                                                                                                                                                                                                                                                                                                                                                                                                                                                                                                                                                 |              |            |            |                   |                 |                                      |                                      |                                       |                                       |  |        |                                       |                                       |       |       |       |       |                                                          |       |                                                          |  |  |  |  |  |  |  |               |       |           |     |      |    |     |       |                   |        |                      |      |                          |  |    |           |    |      |                    |                 |                             |                                                                               |  |     |  |     |       |                     |                          |  |  |                                                       |            |  |            |               |                           |                                                                                                                                                          |  |  |  |           |     |      |    |      |      |                                                       |        |                       |                          |  |  |           |  |  |           |               |                              |                                                                               |  |     |  |     |       |                   |  |             |      |                                         |                                                                                                                                                                                                                                                                     |    |  |    |      |                   |                 |       |        |  |     |  |     |       |                   |                          |  |  |  |            |  |            |               |                          |                                                                                                                                                            |  |  |  |  |  |  |  |  |  |                                                                                                   |  |  |  |  |  |  |  |  |  |                                |                                                                                                                                                                                                                                                                                                                                   |
| Bleecker 2016                                                                                                                                                                                                 | 0.159                                                                                                                                                                                                                                                                                                                                | 0.0464                                                                                                                                                                                                                                                                                                                                                                                                                                                                                                                                                                                                                                                                                                                                                                                                                                                                                                                                                                                                                                                                                                                                                                                                                                                                                                                                                                                                                                                                                                                                                                                                                                                                                                                                                                                                                                                                                                                                                                                                                                                                                                                                                                                                                                                                                                                                                                                                          |              | 264        |            | 261               | 43.6%           | 0.16 [0.07, 0.25]                    |                                      |                                       |                                       |  |        |                                       |                                       |       |       |       |       |                                                          |       |                                                          |  |  |  |  |  |  |  |               |       |           |     |      |    |     |       |                   |        |                      |      |                          |  |    |           |    |      |                    |                 |                             |                                                                               |  |     |  |     |       |                     |                          |  |  |                                                       |            |  |            |               |                           |                                                                                                                                                          |  |  |  |           |     |      |    |      |      |                                                       |        |                       |                          |  |  |           |  |  |           |               |                              |                                                                               |  |     |  |     |       |                   |  |             |      |                                         |                                                                                                                                                                                                                                                                     |    |  |    |      |                   |                 |       |        |  |     |  |     |       |                   |                          |  |  |  |            |  |            |               |                          |                                                                                                                                                            |  |  |  |  |  |  |  |  |  |                                                                                                   |  |  |  |  |  |  |  |  |  |                                |                                                                                                                                                                                                                                                                                                                                   |
| Castro 2014                                                                                                                                                                                                   | 0.23                                                                                                                                                                                                                                                                                                                                 | 0.0977                                                                                                                                                                                                                                                                                                                                                                                                                                                                                                                                                                                                                                                                                                                                                                                                                                                                                                                                                                                                                                                                                                                                                                                                                                                                                                                                                                                                                                                                                                                                                                                                                                                                                                                                                                                                                                                                                                                                                                                                                                                                                                                                                                                                                                                                                                                                                                                                          |              | 48         |            | 53                | 9.8%            | 0.23 [0.04, 0.42]                    |                                      |                                       |                                       |  |        |                                       |                                       |       |       |       |       |                                                          |       |                                                          |  |  |  |  |  |  |  |               |       |           |     |      |    |     |       |                   |        |                      |      |                          |  |    |           |    |      |                    |                 |                             |                                                                               |  |     |  |     |       |                     |                          |  |  |                                                       |            |  |            |               |                           |                                                                                                                                                          |  |  |  |           |     |      |    |      |      |                                                       |        |                       |                          |  |  |           |  |  |           |               |                              |                                                                               |  |     |  |     |       |                   |  |             |      |                                         |                                                                                                                                                                                                                                                                     |    |  |    |      |                   |                 |       |        |  |     |  |     |       |                   |                          |  |  |  |            |  |            |               |                          |                                                                                                                                                            |  |  |  |  |  |  |  |  |  |                                                                                                   |  |  |  |  |  |  |  |  |  |                                |                                                                                                                                                                                                                                                                                                                                   |
| FitzGerald 2016                                                                                                                                                                                               | 0.116                                                                                                                                                                                                                                                                                                                                | 0.0449                                                                                                                                                                                                                                                                                                                                                                                                                                                                                                                                                                                                                                                                                                                                                                                                                                                                                                                                                                                                                                                                                                                                                                                                                                                                                                                                                                                                                                                                                                                                                                                                                                                                                                                                                                                                                                                                                                                                                                                                                                                                                                                                                                                                                                                                                                                                                                                                          |              | 238        |            | 244               | 46.6%           | 0.12 [0.03, 0.20]                    |                                      |                                       |                                       |  |        |                                       |                                       |       |       |       |       |                                                          |       |                                                          |  |  |  |  |  |  |  |               |       |           |     |      |    |     |       |                   |        |                      |      |                          |  |    |           |    |      |                    |                 |                             |                                                                               |  |     |  |     |       |                     |                          |  |  |                                                       |            |  |            |               |                           |                                                                                                                                                          |  |  |  |           |     |      |    |      |      |                                                       |        |                       |                          |  |  |           |  |  |           |               |                              |                                                                               |  |     |  |     |       |                   |  |             |      |                                         |                                                                                                                                                                                                                                                                     |    |  |    |      |                   |                 |       |        |  |     |  |     |       |                   |                          |  |  |  |            |  |            |               |                          |                                                                                                                                                            |  |  |  |  |  |  |  |  |  |                                                                                                   |  |  |  |  |  |  |  |  |  |                                |                                                                                                                                                                                                                                                                                                                                   |
| <b>Subtotal (95% CI)</b>                                                                                                                                                                                      |                                                                                                                                                                                                                                                                                                                                      |                                                                                                                                                                                                                                                                                                                                                                                                                                                                                                                                                                                                                                                                                                                                                                                                                                                                                                                                                                                                                                                                                                                                                                                                                                                                                                                                                                                                                                                                                                                                                                                                                                                                                                                                                                                                                                                                                                                                                                                                                                                                                                                                                                                                                                                                                                                                                                                                                 |              | <b>550</b> |            | <b>558</b>        | <b>100.0%</b>   | <b>0.15 [0.09, 0.21]</b>             |                                      |                                       |                                       |  |        |                                       |                                       |       |       |       |       |                                                          |       |                                                          |  |  |  |  |  |  |  |               |       |           |     |      |    |     |       |                   |        |                      |      |                          |  |    |           |    |      |                    |                 |                             |                                                                               |  |     |  |     |       |                     |                          |  |  |                                                       |            |  |            |               |                           |                                                                                                                                                          |  |  |  |           |     |      |    |      |      |                                                       |        |                       |                          |  |  |           |  |  |           |               |                              |                                                                               |  |     |  |     |       |                   |  |             |      |                                         |                                                                                                                                                                                                                                                                     |    |  |    |      |                   |                 |       |        |  |     |  |     |       |                   |                          |  |  |  |            |  |            |               |                          |                                                                                                                                                            |  |  |  |  |  |  |  |  |  |                                                                                                   |  |  |  |  |  |  |  |  |  |                                |                                                                                                                                                                                                                                                                                                                                   |
| Heterogeneity: Tau <sup>2</sup> = 0.00; Chi <sup>2</sup> = 1.26, df = 2 (P = 0.53); I <sup>2</sup> = 0%<br>Test for overall effect: Z = 4.76 (P < 0.00001)                                                    |                                                                                                                                                                                                                                                                                                                                      |                                                                                                                                                                                                                                                                                                                                                                                                                                                                                                                                                                                                                                                                                                                                                                                                                                                                                                                                                                                                                                                                                                                                                                                                                                                                                                                                                                                                                                                                                                                                                                                                                                                                                                                                                                                                                                                                                                                                                                                                                                                                                                                                                                                                                                                                                                                                                                                                                 |              |            |            |                   |                 |                                      |                                      |                                       |                                       |  |        |                                       |                                       |       |       |       |       |                                                          |       |                                                          |  |  |  |  |  |  |  |               |       |           |     |      |    |     |       |                   |        |                      |      |                          |  |    |           |    |      |                    |                 |                             |                                                                               |  |     |  |     |       |                     |                          |  |  |                                                       |            |  |            |               |                           |                                                                                                                                                          |  |  |  |           |     |      |    |      |      |                                                       |        |                       |                          |  |  |           |  |  |           |               |                              |                                                                               |  |     |  |     |       |                   |  |             |      |                                         |                                                                                                                                                                                                                                                                     |    |  |    |      |                   |                 |       |        |  |     |  |     |       |                   |                          |  |  |  |            |  |            |               |                          |                                                                                                                                                            |  |  |  |  |  |  |  |  |  |                                                                                                   |  |  |  |  |  |  |  |  |  |                                |                                                                                                                                                                                                                                                                                                                                   |
| Test for subgroup differences: Chi <sup>2</sup> = 3.21, df = 1 (P = 0.07), I <sup>2</sup> = 68.9%                                                                                                             |                                                                                                                                                                                                                                                                                                                                      |                                                                                                                                                                                                                                                                                                                                                                                                                                                                                                                                                                                                                                                                                                                                                                                                                                                                                                                                                                                                                                                                                                                                                                                                                                                                                                                                                                                                                                                                                                                                                                                                                                                                                                                                                                                                                                                                                                                                                                                                                                                                                                                                                                                                                                                                                                                                                                                                                 |              |            |            |                   |                 |                                      |                                      |                                       |                                       |  |        |                                       |                                       |       |       |       |       |                                                          |       |                                                          |  |  |  |  |  |  |  |               |       |           |     |      |    |     |       |                   |        |                      |      |                          |  |    |           |    |      |                    |                 |                             |                                                                               |  |     |  |     |       |                     |                          |  |  |                                                       |            |  |            |               |                           |                                                                                                                                                          |  |  |  |           |     |      |    |      |      |                                                       |        |                       |                          |  |  |           |  |  |           |               |                              |                                                                               |  |     |  |     |       |                   |  |             |      |                                         |                                                                                                                                                                                                                                                                     |    |  |    |      |                   |                 |       |        |  |     |  |     |       |                   |                          |  |  |  |            |  |            |               |                          |                                                                                                                                                            |  |  |  |  |  |  |  |  |  |                                                                                                   |  |  |  |  |  |  |  |  |  |                                |                                                                                                                                                                                                                                                                                                                                   |

| Outcome<br>№ of participants<br>(studies)                                                                                                                    | Relative effect<br>(95% CI)                                                                                                                                                                                                                                                            | Anticipated absolute effects (95% CI)                                                                                                                                                                                                                                                                                                                                                                                                                                                                                                                                                                                                                                                                                                                                                                                                                                                                                                                                                                                                                                                                                                                                                                                                                                                                                                                                                                                                                                                                                                                                                                                                                                                                                                                                                                                                                                                                                                                    |                    |               | Certainty         | What happens                  |    |                    |               |        |                               |                                                          |  |  |  |  |  |  |               |         |        |     |     |       |                   |                 |         |       |     |     |       |                   |                          |  |  |            |            |               |                          |                                                                      |  |  |  |  |  |  |                                              |  |  |  |  |  |  |                                                       |  |  |  |  |  |  |               |         |        |     |     |       |                   |             |         |        |    |    |       |                   |                 |         |        |     |     |       |                   |                          |  |  |            |            |               |                          |                                                                      |  |  |  |  |  |  |                                                 |  |  |  |  |  |  |                                                                        |  |  |  |  |  |  |                                |                                                                                                                                                                                                                                                          |
|--------------------------------------------------------------------------------------------------------------------------------------------------------------|----------------------------------------------------------------------------------------------------------------------------------------------------------------------------------------------------------------------------------------------------------------------------------------|----------------------------------------------------------------------------------------------------------------------------------------------------------------------------------------------------------------------------------------------------------------------------------------------------------------------------------------------------------------------------------------------------------------------------------------------------------------------------------------------------------------------------------------------------------------------------------------------------------------------------------------------------------------------------------------------------------------------------------------------------------------------------------------------------------------------------------------------------------------------------------------------------------------------------------------------------------------------------------------------------------------------------------------------------------------------------------------------------------------------------------------------------------------------------------------------------------------------------------------------------------------------------------------------------------------------------------------------------------------------------------------------------------------------------------------------------------------------------------------------------------------------------------------------------------------------------------------------------------------------------------------------------------------------------------------------------------------------------------------------------------------------------------------------------------------------------------------------------------------------------------------------------------------------------------------------------------|--------------------|---------------|-------------------|-------------------------------|----|--------------------|---------------|--------|-------------------------------|----------------------------------------------------------|--|--|--|--|--|--|---------------|---------|--------|-----|-----|-------|-------------------|-----------------|---------|-------|-----|-----|-------|-------------------|--------------------------|--|--|------------|------------|---------------|--------------------------|----------------------------------------------------------------------|--|--|--|--|--|--|----------------------------------------------|--|--|--|--|--|--|-------------------------------------------------------|--|--|--|--|--|--|---------------|---------|--------|-----|-----|-------|-------------------|-------------|---------|--------|----|----|-------|-------------------|-----------------|---------|--------|-----|-----|-------|-------------------|--------------------------|--|--|------------|------------|---------------|--------------------------|----------------------------------------------------------------------|--|--|--|--|--|--|-------------------------------------------------|--|--|--|--|--|--|------------------------------------------------------------------------|--|--|--|--|--|--|--------------------------------|----------------------------------------------------------------------------------------------------------------------------------------------------------------------------------------------------------------------------------------------------------|
|                                                                                                                                                              |                                                                                                                                                                                                                                                                                        |                                                                                                                                                                                                                                                                                                                                                                                                                                                                                                                                                                                                                                                                                                                                                                                                                                                                                                                                                                                                                                                                                                                                                                                                                                                                                                                                                                                                                                                                                                                                                                                                                                                                                                                                                                                                                                                                                                                                                          |                    | Difference    |                   |                               |    |                    |               |        |                               |                                                          |  |  |  |  |  |  |               |         |        |     |     |       |                   |                 |         |       |     |     |       |                   |                          |  |  |            |            |               |                          |                                                                      |  |  |  |  |  |  |                                              |  |  |  |  |  |  |                                                       |  |  |  |  |  |  |               |         |        |     |     |       |                   |             |         |        |    |    |       |                   |                 |         |        |     |     |       |                   |                          |  |  |            |            |               |                          |                                                                      |  |  |  |  |  |  |                                                 |  |  |  |  |  |  |                                                                        |  |  |  |  |  |  |                                |                                                                                                                                                                                                                                                          |
| <b>Rate of any exacerbation</b><br>follow up: range 28 weeks to 56 weeks<br>№ of participants: 1322<br>(3 RCTs) <sup>1,2,3</sup><br><br>Importance: CRITICAL | Annualised mean exacerbation rates per patient treated with mepolizumab compared to placebo were:<br>Eosinophil <300/uL: Rate ratio (95%CI) = 0.71 (0.52 to 0.97), n=518. Eosinophil ≥300/uL: Rate ratio (95%CI) = 0.59 (0.47 to 0.73), n=1174. Test for subgroup differences, p=0.33. | <table border="1"> <thead> <tr> <th>Study or Subgroup</th> <th>log[Rate Ratio]</th> <th>SE</th> <th>Benralizumab Total</th> <th>Placebo Total</th> <th>Weight</th> <th>Rate Ratio IV, Random, 95% CI</th> </tr> </thead> <tbody> <tr> <td colspan="7"><b>6.7.1 Baseline blood eosinophils &lt;300 cells/μL</b></td> </tr> <tr> <td>Bleecker 2016</td> <td>-0.1863</td> <td>0.1741</td> <td>131</td> <td>140</td> <td>51.3%</td> <td>0.83 [0.59, 1.17]</td> </tr> <tr> <td>FitzGerald 2016</td> <td>-0.5108</td> <td>0.182</td> <td>125</td> <td>122</td> <td>48.7%</td> <td>0.60 [0.42, 0.86]</td> </tr> <tr> <td><b>Subtotal (95% CI)</b></td> <td></td> <td></td> <td><b>256</b></td> <td><b>262</b></td> <td><b>100.0%</b></td> <td><b>0.71 [0.52, 0.97]</b></td> </tr> <tr> <td colspan="7">Heterogeneity: Tau² = 0.02; Chi² = 1.66, df = 1 (P = 0.20); I² = 40%</td> </tr> <tr> <td colspan="7">Test for overall effect: Z = 2.12 (P = 0.03)</td> </tr> <tr> <td colspan="7"><b>6.7.2 Baseline blood eosinophils ≥300 cells/μL</b></td> </tr> <tr> <td>Bleecker 2016</td> <td>-0.7133</td> <td>0.1433</td> <td>267</td> <td>267</td> <td>34.4%</td> <td>0.49 [0.37, 0.65]</td> </tr> <tr> <td>Castro 2014</td> <td>-0.5621</td> <td>0.1523</td> <td>70</td> <td>83</td> <td>32.1%</td> <td>0.57 [0.42, 0.77]</td> </tr> <tr> <td>FitzGerald 2016</td> <td>-0.3285</td> <td>0.1468</td> <td>239</td> <td>248</td> <td>33.5%</td> <td>0.72 [0.54, 0.96]</td> </tr> <tr> <td><b>Subtotal (95% CI)</b></td> <td></td> <td></td> <td><b>576</b></td> <td><b>598</b></td> <td><b>100.0%</b></td> <td><b>0.59 [0.47, 0.73]</b></td> </tr> <tr> <td colspan="7">Heterogeneity: Tau² = 0.02; Chi² = 3.56, df = 2 (P = 0.17); I² = 44%</td> </tr> <tr> <td colspan="7">Test for overall effect: Z = 4.72 (P &lt; 0.00001)</td> </tr> <tr> <td colspan="7">Test for subgroup differences: Chi² = 0.94, df = 1 (P = 0.33), I² = 0%</td> </tr> </tbody> </table> |                    |               | Study or Subgroup | log[Rate Ratio]               | SE | Benralizumab Total | Placebo Total | Weight | Rate Ratio IV, Random, 95% CI | <b>6.7.1 Baseline blood eosinophils &lt;300 cells/μL</b> |  |  |  |  |  |  | Bleecker 2016 | -0.1863 | 0.1741 | 131 | 140 | 51.3% | 0.83 [0.59, 1.17] | FitzGerald 2016 | -0.5108 | 0.182 | 125 | 122 | 48.7% | 0.60 [0.42, 0.86] | <b>Subtotal (95% CI)</b> |  |  | <b>256</b> | <b>262</b> | <b>100.0%</b> | <b>0.71 [0.52, 0.97]</b> | Heterogeneity: Tau² = 0.02; Chi² = 1.66, df = 1 (P = 0.20); I² = 40% |  |  |  |  |  |  | Test for overall effect: Z = 2.12 (P = 0.03) |  |  |  |  |  |  | <b>6.7.2 Baseline blood eosinophils ≥300 cells/μL</b> |  |  |  |  |  |  | Bleecker 2016 | -0.7133 | 0.1433 | 267 | 267 | 34.4% | 0.49 [0.37, 0.65] | Castro 2014 | -0.5621 | 0.1523 | 70 | 83 | 32.1% | 0.57 [0.42, 0.77] | FitzGerald 2016 | -0.3285 | 0.1468 | 239 | 248 | 33.5% | 0.72 [0.54, 0.96] | <b>Subtotal (95% CI)</b> |  |  | <b>576</b> | <b>598</b> | <b>100.0%</b> | <b>0.59 [0.47, 0.73]</b> | Heterogeneity: Tau² = 0.02; Chi² = 3.56, df = 2 (P = 0.17); I² = 44% |  |  |  |  |  |  | Test for overall effect: Z = 4.72 (P < 0.00001) |  |  |  |  |  |  | Test for subgroup differences: Chi² = 0.94, df = 1 (P = 0.33), I² = 0% |  |  |  |  |  |  | ⊕⊕○<br>○<br>LOW <sup>b,g</sup> | There are significant reductions in exacerbation rates with benralizumab compared to placebo in those patients with baseline blood eosinophil counts <300/μL and ≥300/ μL. However there are no statistically significant differences between subgroups. |
| Study or Subgroup                                                                                                                                            | log[Rate Ratio]                                                                                                                                                                                                                                                                        | SE                                                                                                                                                                                                                                                                                                                                                                                                                                                                                                                                                                                                                                                                                                                                                                                                                                                                                                                                                                                                                                                                                                                                                                                                                                                                                                                                                                                                                                                                                                                                                                                                                                                                                                                                                                                                                                                                                                                                                       | Benralizumab Total | Placebo Total | Weight            | Rate Ratio IV, Random, 95% CI |    |                    |               |        |                               |                                                          |  |  |  |  |  |  |               |         |        |     |     |       |                   |                 |         |       |     |     |       |                   |                          |  |  |            |            |               |                          |                                                                      |  |  |  |  |  |  |                                              |  |  |  |  |  |  |                                                       |  |  |  |  |  |  |               |         |        |     |     |       |                   |             |         |        |    |    |       |                   |                 |         |        |     |     |       |                   |                          |  |  |            |            |               |                          |                                                                      |  |  |  |  |  |  |                                                 |  |  |  |  |  |  |                                                                        |  |  |  |  |  |  |                                |                                                                                                                                                                                                                                                          |
| <b>6.7.1 Baseline blood eosinophils &lt;300 cells/μL</b>                                                                                                     |                                                                                                                                                                                                                                                                                        |                                                                                                                                                                                                                                                                                                                                                                                                                                                                                                                                                                                                                                                                                                                                                                                                                                                                                                                                                                                                                                                                                                                                                                                                                                                                                                                                                                                                                                                                                                                                                                                                                                                                                                                                                                                                                                                                                                                                                          |                    |               |                   |                               |    |                    |               |        |                               |                                                          |  |  |  |  |  |  |               |         |        |     |     |       |                   |                 |         |       |     |     |       |                   |                          |  |  |            |            |               |                          |                                                                      |  |  |  |  |  |  |                                              |  |  |  |  |  |  |                                                       |  |  |  |  |  |  |               |         |        |     |     |       |                   |             |         |        |    |    |       |                   |                 |         |        |     |     |       |                   |                          |  |  |            |            |               |                          |                                                                      |  |  |  |  |  |  |                                                 |  |  |  |  |  |  |                                                                        |  |  |  |  |  |  |                                |                                                                                                                                                                                                                                                          |
| Bleecker 2016                                                                                                                                                | -0.1863                                                                                                                                                                                                                                                                                | 0.1741                                                                                                                                                                                                                                                                                                                                                                                                                                                                                                                                                                                                                                                                                                                                                                                                                                                                                                                                                                                                                                                                                                                                                                                                                                                                                                                                                                                                                                                                                                                                                                                                                                                                                                                                                                                                                                                                                                                                                   | 131                | 140           | 51.3%             | 0.83 [0.59, 1.17]             |    |                    |               |        |                               |                                                          |  |  |  |  |  |  |               |         |        |     |     |       |                   |                 |         |       |     |     |       |                   |                          |  |  |            |            |               |                          |                                                                      |  |  |  |  |  |  |                                              |  |  |  |  |  |  |                                                       |  |  |  |  |  |  |               |         |        |     |     |       |                   |             |         |        |    |    |       |                   |                 |         |        |     |     |       |                   |                          |  |  |            |            |               |                          |                                                                      |  |  |  |  |  |  |                                                 |  |  |  |  |  |  |                                                                        |  |  |  |  |  |  |                                |                                                                                                                                                                                                                                                          |
| FitzGerald 2016                                                                                                                                              | -0.5108                                                                                                                                                                                                                                                                                | 0.182                                                                                                                                                                                                                                                                                                                                                                                                                                                                                                                                                                                                                                                                                                                                                                                                                                                                                                                                                                                                                                                                                                                                                                                                                                                                                                                                                                                                                                                                                                                                                                                                                                                                                                                                                                                                                                                                                                                                                    | 125                | 122           | 48.7%             | 0.60 [0.42, 0.86]             |    |                    |               |        |                               |                                                          |  |  |  |  |  |  |               |         |        |     |     |       |                   |                 |         |       |     |     |       |                   |                          |  |  |            |            |               |                          |                                                                      |  |  |  |  |  |  |                                              |  |  |  |  |  |  |                                                       |  |  |  |  |  |  |               |         |        |     |     |       |                   |             |         |        |    |    |       |                   |                 |         |        |     |     |       |                   |                          |  |  |            |            |               |                          |                                                                      |  |  |  |  |  |  |                                                 |  |  |  |  |  |  |                                                                        |  |  |  |  |  |  |                                |                                                                                                                                                                                                                                                          |
| <b>Subtotal (95% CI)</b>                                                                                                                                     |                                                                                                                                                                                                                                                                                        |                                                                                                                                                                                                                                                                                                                                                                                                                                                                                                                                                                                                                                                                                                                                                                                                                                                                                                                                                                                                                                                                                                                                                                                                                                                                                                                                                                                                                                                                                                                                                                                                                                                                                                                                                                                                                                                                                                                                                          | <b>256</b>         | <b>262</b>    | <b>100.0%</b>     | <b>0.71 [0.52, 0.97]</b>      |    |                    |               |        |                               |                                                          |  |  |  |  |  |  |               |         |        |     |     |       |                   |                 |         |       |     |     |       |                   |                          |  |  |            |            |               |                          |                                                                      |  |  |  |  |  |  |                                              |  |  |  |  |  |  |                                                       |  |  |  |  |  |  |               |         |        |     |     |       |                   |             |         |        |    |    |       |                   |                 |         |        |     |     |       |                   |                          |  |  |            |            |               |                          |                                                                      |  |  |  |  |  |  |                                                 |  |  |  |  |  |  |                                                                        |  |  |  |  |  |  |                                |                                                                                                                                                                                                                                                          |
| Heterogeneity: Tau² = 0.02; Chi² = 1.66, df = 1 (P = 0.20); I² = 40%                                                                                         |                                                                                                                                                                                                                                                                                        |                                                                                                                                                                                                                                                                                                                                                                                                                                                                                                                                                                                                                                                                                                                                                                                                                                                                                                                                                                                                                                                                                                                                                                                                                                                                                                                                                                                                                                                                                                                                                                                                                                                                                                                                                                                                                                                                                                                                                          |                    |               |                   |                               |    |                    |               |        |                               |                                                          |  |  |  |  |  |  |               |         |        |     |     |       |                   |                 |         |       |     |     |       |                   |                          |  |  |            |            |               |                          |                                                                      |  |  |  |  |  |  |                                              |  |  |  |  |  |  |                                                       |  |  |  |  |  |  |               |         |        |     |     |       |                   |             |         |        |    |    |       |                   |                 |         |        |     |     |       |                   |                          |  |  |            |            |               |                          |                                                                      |  |  |  |  |  |  |                                                 |  |  |  |  |  |  |                                                                        |  |  |  |  |  |  |                                |                                                                                                                                                                                                                                                          |
| Test for overall effect: Z = 2.12 (P = 0.03)                                                                                                                 |                                                                                                                                                                                                                                                                                        |                                                                                                                                                                                                                                                                                                                                                                                                                                                                                                                                                                                                                                                                                                                                                                                                                                                                                                                                                                                                                                                                                                                                                                                                                                                                                                                                                                                                                                                                                                                                                                                                                                                                                                                                                                                                                                                                                                                                                          |                    |               |                   |                               |    |                    |               |        |                               |                                                          |  |  |  |  |  |  |               |         |        |     |     |       |                   |                 |         |       |     |     |       |                   |                          |  |  |            |            |               |                          |                                                                      |  |  |  |  |  |  |                                              |  |  |  |  |  |  |                                                       |  |  |  |  |  |  |               |         |        |     |     |       |                   |             |         |        |    |    |       |                   |                 |         |        |     |     |       |                   |                          |  |  |            |            |               |                          |                                                                      |  |  |  |  |  |  |                                                 |  |  |  |  |  |  |                                                                        |  |  |  |  |  |  |                                |                                                                                                                                                                                                                                                          |
| <b>6.7.2 Baseline blood eosinophils ≥300 cells/μL</b>                                                                                                        |                                                                                                                                                                                                                                                                                        |                                                                                                                                                                                                                                                                                                                                                                                                                                                                                                                                                                                                                                                                                                                                                                                                                                                                                                                                                                                                                                                                                                                                                                                                                                                                                                                                                                                                                                                                                                                                                                                                                                                                                                                                                                                                                                                                                                                                                          |                    |               |                   |                               |    |                    |               |        |                               |                                                          |  |  |  |  |  |  |               |         |        |     |     |       |                   |                 |         |       |     |     |       |                   |                          |  |  |            |            |               |                          |                                                                      |  |  |  |  |  |  |                                              |  |  |  |  |  |  |                                                       |  |  |  |  |  |  |               |         |        |     |     |       |                   |             |         |        |    |    |       |                   |                 |         |        |     |     |       |                   |                          |  |  |            |            |               |                          |                                                                      |  |  |  |  |  |  |                                                 |  |  |  |  |  |  |                                                                        |  |  |  |  |  |  |                                |                                                                                                                                                                                                                                                          |
| Bleecker 2016                                                                                                                                                | -0.7133                                                                                                                                                                                                                                                                                | 0.1433                                                                                                                                                                                                                                                                                                                                                                                                                                                                                                                                                                                                                                                                                                                                                                                                                                                                                                                                                                                                                                                                                                                                                                                                                                                                                                                                                                                                                                                                                                                                                                                                                                                                                                                                                                                                                                                                                                                                                   | 267                | 267           | 34.4%             | 0.49 [0.37, 0.65]             |    |                    |               |        |                               |                                                          |  |  |  |  |  |  |               |         |        |     |     |       |                   |                 |         |       |     |     |       |                   |                          |  |  |            |            |               |                          |                                                                      |  |  |  |  |  |  |                                              |  |  |  |  |  |  |                                                       |  |  |  |  |  |  |               |         |        |     |     |       |                   |             |         |        |    |    |       |                   |                 |         |        |     |     |       |                   |                          |  |  |            |            |               |                          |                                                                      |  |  |  |  |  |  |                                                 |  |  |  |  |  |  |                                                                        |  |  |  |  |  |  |                                |                                                                                                                                                                                                                                                          |
| Castro 2014                                                                                                                                                  | -0.5621                                                                                                                                                                                                                                                                                | 0.1523                                                                                                                                                                                                                                                                                                                                                                                                                                                                                                                                                                                                                                                                                                                                                                                                                                                                                                                                                                                                                                                                                                                                                                                                                                                                                                                                                                                                                                                                                                                                                                                                                                                                                                                                                                                                                                                                                                                                                   | 70                 | 83            | 32.1%             | 0.57 [0.42, 0.77]             |    |                    |               |        |                               |                                                          |  |  |  |  |  |  |               |         |        |     |     |       |                   |                 |         |       |     |     |       |                   |                          |  |  |            |            |               |                          |                                                                      |  |  |  |  |  |  |                                              |  |  |  |  |  |  |                                                       |  |  |  |  |  |  |               |         |        |     |     |       |                   |             |         |        |    |    |       |                   |                 |         |        |     |     |       |                   |                          |  |  |            |            |               |                          |                                                                      |  |  |  |  |  |  |                                                 |  |  |  |  |  |  |                                                                        |  |  |  |  |  |  |                                |                                                                                                                                                                                                                                                          |
| FitzGerald 2016                                                                                                                                              | -0.3285                                                                                                                                                                                                                                                                                | 0.1468                                                                                                                                                                                                                                                                                                                                                                                                                                                                                                                                                                                                                                                                                                                                                                                                                                                                                                                                                                                                                                                                                                                                                                                                                                                                                                                                                                                                                                                                                                                                                                                                                                                                                                                                                                                                                                                                                                                                                   | 239                | 248           | 33.5%             | 0.72 [0.54, 0.96]             |    |                    |               |        |                               |                                                          |  |  |  |  |  |  |               |         |        |     |     |       |                   |                 |         |       |     |     |       |                   |                          |  |  |            |            |               |                          |                                                                      |  |  |  |  |  |  |                                              |  |  |  |  |  |  |                                                       |  |  |  |  |  |  |               |         |        |     |     |       |                   |             |         |        |    |    |       |                   |                 |         |        |     |     |       |                   |                          |  |  |            |            |               |                          |                                                                      |  |  |  |  |  |  |                                                 |  |  |  |  |  |  |                                                                        |  |  |  |  |  |  |                                |                                                                                                                                                                                                                                                          |
| <b>Subtotal (95% CI)</b>                                                                                                                                     |                                                                                                                                                                                                                                                                                        |                                                                                                                                                                                                                                                                                                                                                                                                                                                                                                                                                                                                                                                                                                                                                                                                                                                                                                                                                                                                                                                                                                                                                                                                                                                                                                                                                                                                                                                                                                                                                                                                                                                                                                                                                                                                                                                                                                                                                          | <b>576</b>         | <b>598</b>    | <b>100.0%</b>     | <b>0.59 [0.47, 0.73]</b>      |    |                    |               |        |                               |                                                          |  |  |  |  |  |  |               |         |        |     |     |       |                   |                 |         |       |     |     |       |                   |                          |  |  |            |            |               |                          |                                                                      |  |  |  |  |  |  |                                              |  |  |  |  |  |  |                                                       |  |  |  |  |  |  |               |         |        |     |     |       |                   |             |         |        |    |    |       |                   |                 |         |        |     |     |       |                   |                          |  |  |            |            |               |                          |                                                                      |  |  |  |  |  |  |                                                 |  |  |  |  |  |  |                                                                        |  |  |  |  |  |  |                                |                                                                                                                                                                                                                                                          |
| Heterogeneity: Tau² = 0.02; Chi² = 3.56, df = 2 (P = 0.17); I² = 44%                                                                                         |                                                                                                                                                                                                                                                                                        |                                                                                                                                                                                                                                                                                                                                                                                                                                                                                                                                                                                                                                                                                                                                                                                                                                                                                                                                                                                                                                                                                                                                                                                                                                                                                                                                                                                                                                                                                                                                                                                                                                                                                                                                                                                                                                                                                                                                                          |                    |               |                   |                               |    |                    |               |        |                               |                                                          |  |  |  |  |  |  |               |         |        |     |     |       |                   |                 |         |       |     |     |       |                   |                          |  |  |            |            |               |                          |                                                                      |  |  |  |  |  |  |                                              |  |  |  |  |  |  |                                                       |  |  |  |  |  |  |               |         |        |     |     |       |                   |             |         |        |    |    |       |                   |                 |         |        |     |     |       |                   |                          |  |  |            |            |               |                          |                                                                      |  |  |  |  |  |  |                                                 |  |  |  |  |  |  |                                                                        |  |  |  |  |  |  |                                |                                                                                                                                                                                                                                                          |
| Test for overall effect: Z = 4.72 (P < 0.00001)                                                                                                              |                                                                                                                                                                                                                                                                                        |                                                                                                                                                                                                                                                                                                                                                                                                                                                                                                                                                                                                                                                                                                                                                                                                                                                                                                                                                                                                                                                                                                                                                                                                                                                                                                                                                                                                                                                                                                                                                                                                                                                                                                                                                                                                                                                                                                                                                          |                    |               |                   |                               |    |                    |               |        |                               |                                                          |  |  |  |  |  |  |               |         |        |     |     |       |                   |                 |         |       |     |     |       |                   |                          |  |  |            |            |               |                          |                                                                      |  |  |  |  |  |  |                                              |  |  |  |  |  |  |                                                       |  |  |  |  |  |  |               |         |        |     |     |       |                   |             |         |        |    |    |       |                   |                 |         |        |     |     |       |                   |                          |  |  |            |            |               |                          |                                                                      |  |  |  |  |  |  |                                                 |  |  |  |  |  |  |                                                                        |  |  |  |  |  |  |                                |                                                                                                                                                                                                                                                          |
| Test for subgroup differences: Chi² = 0.94, df = 1 (P = 0.33), I² = 0%                                                                                       |                                                                                                                                                                                                                                                                                        |                                                                                                                                                                                                                                                                                                                                                                                                                                                                                                                                                                                                                                                                                                                                                                                                                                                                                                                                                                                                                                                                                                                                                                                                                                                                                                                                                                                                                                                                                                                                                                                                                                                                                                                                                                                                                                                                                                                                                          |                    |               |                   |                               |    |                    |               |        |                               |                                                          |  |  |  |  |  |  |               |         |        |     |     |       |                   |                 |         |       |     |     |       |                   |                          |  |  |            |            |               |                          |                                                                      |  |  |  |  |  |  |                                              |  |  |  |  |  |  |                                                       |  |  |  |  |  |  |               |         |        |     |     |       |                   |             |         |        |    |    |       |                   |                 |         |        |     |     |       |                   |                          |  |  |            |            |               |                          |                                                                      |  |  |  |  |  |  |                                                 |  |  |  |  |  |  |                                                                        |  |  |  |  |  |  |                                |                                                                                                                                                                                                                                                          |



| Outcome<br>№ of participants<br>(studies)                                                                                                         | Relative effect<br>(95% CI)                                                                                                                                                                                                                                                                                                                                                                                                                                                                                                                                                                                                                                                                                                                                                                                                                                                                                                                                                                                                                                                                                                                                                                                                                                                                                                                                                                                                                                                                                                                                                                                                                                                                                                                                                                                                                                                                                                                                                                                                                                                                                                                                                                                                                                                                                                                                                                                                                                                      | Anticipated absolute effects (95% CI) |                        |                       | Certainty         | What happens                      |        |                                   |                                                          |  |  |  |  |  |  |               |    |     |     |     |       |                   |                 |    |     |     |     |       |                   |                          |  |            |  |            |               |                          |              |     |  |     |  |  |  |                                                                                                         |  |  |  |  |  |  |                                              |  |  |  |  |  |  |                                                       |  |  |  |  |  |  |               |     |     |     |     |       |                   |                 |     |     |     |     |       |                   |                          |  |            |  |            |               |                          |              |     |  |     |  |  |  |                                                                                                          |  |  |  |  |  |  |                                              |  |  |  |  |  |  |                                                                                                |  |  |  |  |  |  |                                           |                                                                                                                                                                                                                                                                   |
|---------------------------------------------------------------------------------------------------------------------------------------------------|----------------------------------------------------------------------------------------------------------------------------------------------------------------------------------------------------------------------------------------------------------------------------------------------------------------------------------------------------------------------------------------------------------------------------------------------------------------------------------------------------------------------------------------------------------------------------------------------------------------------------------------------------------------------------------------------------------------------------------------------------------------------------------------------------------------------------------------------------------------------------------------------------------------------------------------------------------------------------------------------------------------------------------------------------------------------------------------------------------------------------------------------------------------------------------------------------------------------------------------------------------------------------------------------------------------------------------------------------------------------------------------------------------------------------------------------------------------------------------------------------------------------------------------------------------------------------------------------------------------------------------------------------------------------------------------------------------------------------------------------------------------------------------------------------------------------------------------------------------------------------------------------------------------------------------------------------------------------------------------------------------------------------------------------------------------------------------------------------------------------------------------------------------------------------------------------------------------------------------------------------------------------------------------------------------------------------------------------------------------------------------------------------------------------------------------------------------------------------------|---------------------------------------|------------------------|-----------------------|-------------------|-----------------------------------|--------|-----------------------------------|----------------------------------------------------------|--|--|--|--|--|--|---------------|----|-----|-----|-----|-------|-------------------|-----------------|----|-----|-----|-----|-------|-------------------|--------------------------|--|------------|--|------------|---------------|--------------------------|--------------|-----|--|-----|--|--|--|---------------------------------------------------------------------------------------------------------|--|--|--|--|--|--|----------------------------------------------|--|--|--|--|--|--|-------------------------------------------------------|--|--|--|--|--|--|---------------|-----|-----|-----|-----|-------|-------------------|-----------------|-----|-----|-----|-----|-------|-------------------|--------------------------|--|------------|--|------------|---------------|--------------------------|--------------|-----|--|-----|--|--|--|----------------------------------------------------------------------------------------------------------|--|--|--|--|--|--|----------------------------------------------|--|--|--|--|--|--|------------------------------------------------------------------------------------------------|--|--|--|--|--|--|-------------------------------------------|-------------------------------------------------------------------------------------------------------------------------------------------------------------------------------------------------------------------------------------------------------------------|
|                                                                                                                                                   |                                                                                                                                                                                                                                                                                                                                                                                                                                                                                                                                                                                                                                                                                                                                                                                                                                                                                                                                                                                                                                                                                                                                                                                                                                                                                                                                                                                                                                                                                                                                                                                                                                                                                                                                                                                                                                                                                                                                                                                                                                                                                                                                                                                                                                                                                                                                                                                                                                                                                  |                                       |                        | Difference            |                   |                                   |        |                                   |                                                          |  |  |  |  |  |  |               |    |     |     |     |       |                   |                 |    |     |     |     |       |                   |                          |  |            |  |            |               |                          |              |     |  |     |  |  |  |                                                                                                         |  |  |  |  |  |  |                                              |  |  |  |  |  |  |                                                       |  |  |  |  |  |  |               |     |     |     |     |       |                   |                 |     |     |     |     |       |                   |                          |  |            |  |            |               |                          |              |     |  |     |  |  |  |                                                                                                          |  |  |  |  |  |  |                                              |  |  |  |  |  |  |                                                                                                |  |  |  |  |  |  |                                           |                                                                                                                                                                                                                                                                   |
| <b>Adverse events</b><br>follow up: range 48 weeks to 56 weeks<br>№ of participants: 1525<br>(2 RCTs) <sup>1,3</sup><br><br>Importance: IMPORTANT | <p>The proportion of patients treated with benralizumab who had any adverse event compared to placebo were:<br/>Eosinophil &lt; 300/uL: 76.3% versus 79.8%, RR (95%CI) = 0.95 (0.87 to 1.04), Absolute effect = 40 fewer per 1,000 (from 104 fewer to 32 more), n=515. Eosinophil ≥ 300/uL: 73.6% versus 75.9%, RR (95%CI) = 0.98 (0.87 to 1.10), Absolute effect = 15 fewer per 1,000 (from 99 fewer to 76 more), n=1010. Test for subgroup differences, p=0.75.<sup>n</sup></p> <table><thead><tr><th>Study or Subgroup</th><th>Benralizumab<br/>Events</th><th>Benralizumab<br/>Total</th><th>Placebo<br/>Events</th><th>Placebo<br/>Total</th><th>Weight</th><th>Risk Ratio<br/>M-H, Random, 95% CI</th></tr></thead><tbody><tr><td colspan="7"><b>6.8.1 Baseline blood eosinophils &lt;300 cells/μl</b></td></tr><tr><td>Bleecker 2016</td><td>96</td><td>129</td><td>108</td><td>140</td><td>45.2%</td><td>0.96 [0.84, 1.10]</td></tr><tr><td>FitzGerald 2016</td><td>97</td><td>124</td><td>101</td><td>122</td><td>54.8%</td><td>0.94 [0.84, 1.07]</td></tr><tr><td><b>Subtotal (95% CI)</b></td><td></td><td><b>253</b></td><td></td><td><b>262</b></td><td><b>100.0%</b></td><td><b>0.95 [0.87, 1.04]</b></td></tr><tr><td>Total events</td><td>193</td><td></td><td>209</td><td></td><td></td><td></td></tr><tr><td colspan="7">Heterogeneity: Tau<sup>2</sup> = 0.00; Chi<sup>2</sup> = 0.05, df = 1 (P = 0.82); I<sup>2</sup> = 0%</td></tr><tr><td colspan="7">Test for overall effect: Z = 1.02 (P = 0.31)</td></tr><tr><td colspan="7"><b>6.8.2 Baseline blood eosinophils ≥300 cells/μl</b></td></tr><tr><td>Bleecker 2016</td><td>185</td><td>265</td><td>203</td><td>267</td><td>48.9%</td><td>0.92 [0.83, 1.02]</td></tr><tr><td>FitzGerald 2016</td><td>181</td><td>230</td><td>188</td><td>248</td><td>51.1%</td><td>1.04 [0.94, 1.14]</td></tr><tr><td><b>Subtotal (95% CI)</b></td><td></td><td><b>495</b></td><td></td><td><b>515</b></td><td><b>100.0%</b></td><td><b>0.98 [0.87, 1.10]</b></td></tr><tr><td>Total events</td><td>366</td><td></td><td>391</td><td></td><td></td><td></td></tr><tr><td colspan="7">Heterogeneity: Tau<sup>2</sup> = 0.00; Chi<sup>2</sup> = 2.88, df = 1 (P = 0.09); I<sup>2</sup> = 65%</td></tr><tr><td colspan="7">Test for overall effect: Z = 0.37 (P = 0.71)</td></tr><tr><td colspan="7">Test for subgroup differences: Chi<sup>2</sup> = 0.10, df = 1 (P = 0.75), I<sup>2</sup> = 0%</td></tr></tbody></table> | Study or Subgroup                     | Benralizumab<br>Events | Benralizumab<br>Total | Placebo<br>Events | Placebo<br>Total                  | Weight | Risk Ratio<br>M-H, Random, 95% CI | <b>6.8.1 Baseline blood eosinophils &lt;300 cells/μl</b> |  |  |  |  |  |  | Bleecker 2016 | 96 | 129 | 108 | 140 | 45.2% | 0.96 [0.84, 1.10] | FitzGerald 2016 | 97 | 124 | 101 | 122 | 54.8% | 0.94 [0.84, 1.07] | <b>Subtotal (95% CI)</b> |  | <b>253</b> |  | <b>262</b> | <b>100.0%</b> | <b>0.95 [0.87, 1.04]</b> | Total events | 193 |  | 209 |  |  |  | Heterogeneity: Tau <sup>2</sup> = 0.00; Chi <sup>2</sup> = 0.05, df = 1 (P = 0.82); I <sup>2</sup> = 0% |  |  |  |  |  |  | Test for overall effect: Z = 1.02 (P = 0.31) |  |  |  |  |  |  | <b>6.8.2 Baseline blood eosinophils ≥300 cells/μl</b> |  |  |  |  |  |  | Bleecker 2016 | 185 | 265 | 203 | 267 | 48.9% | 0.92 [0.83, 1.02] | FitzGerald 2016 | 181 | 230 | 188 | 248 | 51.1% | 1.04 [0.94, 1.14] | <b>Subtotal (95% CI)</b> |  | <b>495</b> |  | <b>515</b> | <b>100.0%</b> | <b>0.98 [0.87, 1.10]</b> | Total events | 366 |  | 391 |  |  |  | Heterogeneity: Tau <sup>2</sup> = 0.00; Chi <sup>2</sup> = 2.88, df = 1 (P = 0.09); I <sup>2</sup> = 65% |  |  |  |  |  |  | Test for overall effect: Z = 0.37 (P = 0.71) |  |  |  |  |  |  | Test for subgroup differences: Chi <sup>2</sup> = 0.10, df = 1 (P = 0.75), I <sup>2</sup> = 0% |  |  |  |  |  |  | <p>⊕⊕○<br/>○<br/>LOW <sub>k,l,m</sub></p> | <p>There is no significant increase in the incidence of adverse events with benralizumab compared to placebo in patients with baseline blood eosinophil counts &lt;300/μL and ≥300/ μL. There are no statistically significant differences between subgroups.</p> |
| Study or Subgroup                                                                                                                                 | Benralizumab<br>Events                                                                                                                                                                                                                                                                                                                                                                                                                                                                                                                                                                                                                                                                                                                                                                                                                                                                                                                                                                                                                                                                                                                                                                                                                                                                                                                                                                                                                                                                                                                                                                                                                                                                                                                                                                                                                                                                                                                                                                                                                                                                                                                                                                                                                                                                                                                                                                                                                                                           | Benralizumab<br>Total                 | Placebo<br>Events      | Placebo<br>Total      | Weight            | Risk Ratio<br>M-H, Random, 95% CI |        |                                   |                                                          |  |  |  |  |  |  |               |    |     |     |     |       |                   |                 |    |     |     |     |       |                   |                          |  |            |  |            |               |                          |              |     |  |     |  |  |  |                                                                                                         |  |  |  |  |  |  |                                              |  |  |  |  |  |  |                                                       |  |  |  |  |  |  |               |     |     |     |     |       |                   |                 |     |     |     |     |       |                   |                          |  |            |  |            |               |                          |              |     |  |     |  |  |  |                                                                                                          |  |  |  |  |  |  |                                              |  |  |  |  |  |  |                                                                                                |  |  |  |  |  |  |                                           |                                                                                                                                                                                                                                                                   |
| <b>6.8.1 Baseline blood eosinophils &lt;300 cells/μl</b>                                                                                          |                                                                                                                                                                                                                                                                                                                                                                                                                                                                                                                                                                                                                                                                                                                                                                                                                                                                                                                                                                                                                                                                                                                                                                                                                                                                                                                                                                                                                                                                                                                                                                                                                                                                                                                                                                                                                                                                                                                                                                                                                                                                                                                                                                                                                                                                                                                                                                                                                                                                                  |                                       |                        |                       |                   |                                   |        |                                   |                                                          |  |  |  |  |  |  |               |    |     |     |     |       |                   |                 |    |     |     |     |       |                   |                          |  |            |  |            |               |                          |              |     |  |     |  |  |  |                                                                                                         |  |  |  |  |  |  |                                              |  |  |  |  |  |  |                                                       |  |  |  |  |  |  |               |     |     |     |     |       |                   |                 |     |     |     |     |       |                   |                          |  |            |  |            |               |                          |              |     |  |     |  |  |  |                                                                                                          |  |  |  |  |  |  |                                              |  |  |  |  |  |  |                                                                                                |  |  |  |  |  |  |                                           |                                                                                                                                                                                                                                                                   |
| Bleecker 2016                                                                                                                                     | 96                                                                                                                                                                                                                                                                                                                                                                                                                                                                                                                                                                                                                                                                                                                                                                                                                                                                                                                                                                                                                                                                                                                                                                                                                                                                                                                                                                                                                                                                                                                                                                                                                                                                                                                                                                                                                                                                                                                                                                                                                                                                                                                                                                                                                                                                                                                                                                                                                                                                               | 129                                   | 108                    | 140                   | 45.2%             | 0.96 [0.84, 1.10]                 |        |                                   |                                                          |  |  |  |  |  |  |               |    |     |     |     |       |                   |                 |    |     |     |     |       |                   |                          |  |            |  |            |               |                          |              |     |  |     |  |  |  |                                                                                                         |  |  |  |  |  |  |                                              |  |  |  |  |  |  |                                                       |  |  |  |  |  |  |               |     |     |     |     |       |                   |                 |     |     |     |     |       |                   |                          |  |            |  |            |               |                          |              |     |  |     |  |  |  |                                                                                                          |  |  |  |  |  |  |                                              |  |  |  |  |  |  |                                                                                                |  |  |  |  |  |  |                                           |                                                                                                                                                                                                                                                                   |
| FitzGerald 2016                                                                                                                                   | 97                                                                                                                                                                                                                                                                                                                                                                                                                                                                                                                                                                                                                                                                                                                                                                                                                                                                                                                                                                                                                                                                                                                                                                                                                                                                                                                                                                                                                                                                                                                                                                                                                                                                                                                                                                                                                                                                                                                                                                                                                                                                                                                                                                                                                                                                                                                                                                                                                                                                               | 124                                   | 101                    | 122                   | 54.8%             | 0.94 [0.84, 1.07]                 |        |                                   |                                                          |  |  |  |  |  |  |               |    |     |     |     |       |                   |                 |    |     |     |     |       |                   |                          |  |            |  |            |               |                          |              |     |  |     |  |  |  |                                                                                                         |  |  |  |  |  |  |                                              |  |  |  |  |  |  |                                                       |  |  |  |  |  |  |               |     |     |     |     |       |                   |                 |     |     |     |     |       |                   |                          |  |            |  |            |               |                          |              |     |  |     |  |  |  |                                                                                                          |  |  |  |  |  |  |                                              |  |  |  |  |  |  |                                                                                                |  |  |  |  |  |  |                                           |                                                                                                                                                                                                                                                                   |
| <b>Subtotal (95% CI)</b>                                                                                                                          |                                                                                                                                                                                                                                                                                                                                                                                                                                                                                                                                                                                                                                                                                                                                                                                                                                                                                                                                                                                                                                                                                                                                                                                                                                                                                                                                                                                                                                                                                                                                                                                                                                                                                                                                                                                                                                                                                                                                                                                                                                                                                                                                                                                                                                                                                                                                                                                                                                                                                  | <b>253</b>                            |                        | <b>262</b>            | <b>100.0%</b>     | <b>0.95 [0.87, 1.04]</b>          |        |                                   |                                                          |  |  |  |  |  |  |               |    |     |     |     |       |                   |                 |    |     |     |     |       |                   |                          |  |            |  |            |               |                          |              |     |  |     |  |  |  |                                                                                                         |  |  |  |  |  |  |                                              |  |  |  |  |  |  |                                                       |  |  |  |  |  |  |               |     |     |     |     |       |                   |                 |     |     |     |     |       |                   |                          |  |            |  |            |               |                          |              |     |  |     |  |  |  |                                                                                                          |  |  |  |  |  |  |                                              |  |  |  |  |  |  |                                                                                                |  |  |  |  |  |  |                                           |                                                                                                                                                                                                                                                                   |
| Total events                                                                                                                                      | 193                                                                                                                                                                                                                                                                                                                                                                                                                                                                                                                                                                                                                                                                                                                                                                                                                                                                                                                                                                                                                                                                                                                                                                                                                                                                                                                                                                                                                                                                                                                                                                                                                                                                                                                                                                                                                                                                                                                                                                                                                                                                                                                                                                                                                                                                                                                                                                                                                                                                              |                                       | 209                    |                       |                   |                                   |        |                                   |                                                          |  |  |  |  |  |  |               |    |     |     |     |       |                   |                 |    |     |     |     |       |                   |                          |  |            |  |            |               |                          |              |     |  |     |  |  |  |                                                                                                         |  |  |  |  |  |  |                                              |  |  |  |  |  |  |                                                       |  |  |  |  |  |  |               |     |     |     |     |       |                   |                 |     |     |     |     |       |                   |                          |  |            |  |            |               |                          |              |     |  |     |  |  |  |                                                                                                          |  |  |  |  |  |  |                                              |  |  |  |  |  |  |                                                                                                |  |  |  |  |  |  |                                           |                                                                                                                                                                                                                                                                   |
| Heterogeneity: Tau <sup>2</sup> = 0.00; Chi <sup>2</sup> = 0.05, df = 1 (P = 0.82); I <sup>2</sup> = 0%                                           |                                                                                                                                                                                                                                                                                                                                                                                                                                                                                                                                                                                                                                                                                                                                                                                                                                                                                                                                                                                                                                                                                                                                                                                                                                                                                                                                                                                                                                                                                                                                                                                                                                                                                                                                                                                                                                                                                                                                                                                                                                                                                                                                                                                                                                                                                                                                                                                                                                                                                  |                                       |                        |                       |                   |                                   |        |                                   |                                                          |  |  |  |  |  |  |               |    |     |     |     |       |                   |                 |    |     |     |     |       |                   |                          |  |            |  |            |               |                          |              |     |  |     |  |  |  |                                                                                                         |  |  |  |  |  |  |                                              |  |  |  |  |  |  |                                                       |  |  |  |  |  |  |               |     |     |     |     |       |                   |                 |     |     |     |     |       |                   |                          |  |            |  |            |               |                          |              |     |  |     |  |  |  |                                                                                                          |  |  |  |  |  |  |                                              |  |  |  |  |  |  |                                                                                                |  |  |  |  |  |  |                                           |                                                                                                                                                                                                                                                                   |
| Test for overall effect: Z = 1.02 (P = 0.31)                                                                                                      |                                                                                                                                                                                                                                                                                                                                                                                                                                                                                                                                                                                                                                                                                                                                                                                                                                                                                                                                                                                                                                                                                                                                                                                                                                                                                                                                                                                                                                                                                                                                                                                                                                                                                                                                                                                                                                                                                                                                                                                                                                                                                                                                                                                                                                                                                                                                                                                                                                                                                  |                                       |                        |                       |                   |                                   |        |                                   |                                                          |  |  |  |  |  |  |               |    |     |     |     |       |                   |                 |    |     |     |     |       |                   |                          |  |            |  |            |               |                          |              |     |  |     |  |  |  |                                                                                                         |  |  |  |  |  |  |                                              |  |  |  |  |  |  |                                                       |  |  |  |  |  |  |               |     |     |     |     |       |                   |                 |     |     |     |     |       |                   |                          |  |            |  |            |               |                          |              |     |  |     |  |  |  |                                                                                                          |  |  |  |  |  |  |                                              |  |  |  |  |  |  |                                                                                                |  |  |  |  |  |  |                                           |                                                                                                                                                                                                                                                                   |
| <b>6.8.2 Baseline blood eosinophils ≥300 cells/μl</b>                                                                                             |                                                                                                                                                                                                                                                                                                                                                                                                                                                                                                                                                                                                                                                                                                                                                                                                                                                                                                                                                                                                                                                                                                                                                                                                                                                                                                                                                                                                                                                                                                                                                                                                                                                                                                                                                                                                                                                                                                                                                                                                                                                                                                                                                                                                                                                                                                                                                                                                                                                                                  |                                       |                        |                       |                   |                                   |        |                                   |                                                          |  |  |  |  |  |  |               |    |     |     |     |       |                   |                 |    |     |     |     |       |                   |                          |  |            |  |            |               |                          |              |     |  |     |  |  |  |                                                                                                         |  |  |  |  |  |  |                                              |  |  |  |  |  |  |                                                       |  |  |  |  |  |  |               |     |     |     |     |       |                   |                 |     |     |     |     |       |                   |                          |  |            |  |            |               |                          |              |     |  |     |  |  |  |                                                                                                          |  |  |  |  |  |  |                                              |  |  |  |  |  |  |                                                                                                |  |  |  |  |  |  |                                           |                                                                                                                                                                                                                                                                   |
| Bleecker 2016                                                                                                                                     | 185                                                                                                                                                                                                                                                                                                                                                                                                                                                                                                                                                                                                                                                                                                                                                                                                                                                                                                                                                                                                                                                                                                                                                                                                                                                                                                                                                                                                                                                                                                                                                                                                                                                                                                                                                                                                                                                                                                                                                                                                                                                                                                                                                                                                                                                                                                                                                                                                                                                                              | 265                                   | 203                    | 267                   | 48.9%             | 0.92 [0.83, 1.02]                 |        |                                   |                                                          |  |  |  |  |  |  |               |    |     |     |     |       |                   |                 |    |     |     |     |       |                   |                          |  |            |  |            |               |                          |              |     |  |     |  |  |  |                                                                                                         |  |  |  |  |  |  |                                              |  |  |  |  |  |  |                                                       |  |  |  |  |  |  |               |     |     |     |     |       |                   |                 |     |     |     |     |       |                   |                          |  |            |  |            |               |                          |              |     |  |     |  |  |  |                                                                                                          |  |  |  |  |  |  |                                              |  |  |  |  |  |  |                                                                                                |  |  |  |  |  |  |                                           |                                                                                                                                                                                                                                                                   |
| FitzGerald 2016                                                                                                                                   | 181                                                                                                                                                                                                                                                                                                                                                                                                                                                                                                                                                                                                                                                                                                                                                                                                                                                                                                                                                                                                                                                                                                                                                                                                                                                                                                                                                                                                                                                                                                                                                                                                                                                                                                                                                                                                                                                                                                                                                                                                                                                                                                                                                                                                                                                                                                                                                                                                                                                                              | 230                                   | 188                    | 248                   | 51.1%             | 1.04 [0.94, 1.14]                 |        |                                   |                                                          |  |  |  |  |  |  |               |    |     |     |     |       |                   |                 |    |     |     |     |       |                   |                          |  |            |  |            |               |                          |              |     |  |     |  |  |  |                                                                                                         |  |  |  |  |  |  |                                              |  |  |  |  |  |  |                                                       |  |  |  |  |  |  |               |     |     |     |     |       |                   |                 |     |     |     |     |       |                   |                          |  |            |  |            |               |                          |              |     |  |     |  |  |  |                                                                                                          |  |  |  |  |  |  |                                              |  |  |  |  |  |  |                                                                                                |  |  |  |  |  |  |                                           |                                                                                                                                                                                                                                                                   |
| <b>Subtotal (95% CI)</b>                                                                                                                          |                                                                                                                                                                                                                                                                                                                                                                                                                                                                                                                                                                                                                                                                                                                                                                                                                                                                                                                                                                                                                                                                                                                                                                                                                                                                                                                                                                                                                                                                                                                                                                                                                                                                                                                                                                                                                                                                                                                                                                                                                                                                                                                                                                                                                                                                                                                                                                                                                                                                                  | <b>495</b>                            |                        | <b>515</b>            | <b>100.0%</b>     | <b>0.98 [0.87, 1.10]</b>          |        |                                   |                                                          |  |  |  |  |  |  |               |    |     |     |     |       |                   |                 |    |     |     |     |       |                   |                          |  |            |  |            |               |                          |              |     |  |     |  |  |  |                                                                                                         |  |  |  |  |  |  |                                              |  |  |  |  |  |  |                                                       |  |  |  |  |  |  |               |     |     |     |     |       |                   |                 |     |     |     |     |       |                   |                          |  |            |  |            |               |                          |              |     |  |     |  |  |  |                                                                                                          |  |  |  |  |  |  |                                              |  |  |  |  |  |  |                                                                                                |  |  |  |  |  |  |                                           |                                                                                                                                                                                                                                                                   |
| Total events                                                                                                                                      | 366                                                                                                                                                                                                                                                                                                                                                                                                                                                                                                                                                                                                                                                                                                                                                                                                                                                                                                                                                                                                                                                                                                                                                                                                                                                                                                                                                                                                                                                                                                                                                                                                                                                                                                                                                                                                                                                                                                                                                                                                                                                                                                                                                                                                                                                                                                                                                                                                                                                                              |                                       | 391                    |                       |                   |                                   |        |                                   |                                                          |  |  |  |  |  |  |               |    |     |     |     |       |                   |                 |    |     |     |     |       |                   |                          |  |            |  |            |               |                          |              |     |  |     |  |  |  |                                                                                                         |  |  |  |  |  |  |                                              |  |  |  |  |  |  |                                                       |  |  |  |  |  |  |               |     |     |     |     |       |                   |                 |     |     |     |     |       |                   |                          |  |            |  |            |               |                          |              |     |  |     |  |  |  |                                                                                                          |  |  |  |  |  |  |                                              |  |  |  |  |  |  |                                                                                                |  |  |  |  |  |  |                                           |                                                                                                                                                                                                                                                                   |
| Heterogeneity: Tau <sup>2</sup> = 0.00; Chi <sup>2</sup> = 2.88, df = 1 (P = 0.09); I <sup>2</sup> = 65%                                          |                                                                                                                                                                                                                                                                                                                                                                                                                                                                                                                                                                                                                                                                                                                                                                                                                                                                                                                                                                                                                                                                                                                                                                                                                                                                                                                                                                                                                                                                                                                                                                                                                                                                                                                                                                                                                                                                                                                                                                                                                                                                                                                                                                                                                                                                                                                                                                                                                                                                                  |                                       |                        |                       |                   |                                   |        |                                   |                                                          |  |  |  |  |  |  |               |    |     |     |     |       |                   |                 |    |     |     |     |       |                   |                          |  |            |  |            |               |                          |              |     |  |     |  |  |  |                                                                                                         |  |  |  |  |  |  |                                              |  |  |  |  |  |  |                                                       |  |  |  |  |  |  |               |     |     |     |     |       |                   |                 |     |     |     |     |       |                   |                          |  |            |  |            |               |                          |              |     |  |     |  |  |  |                                                                                                          |  |  |  |  |  |  |                                              |  |  |  |  |  |  |                                                                                                |  |  |  |  |  |  |                                           |                                                                                                                                                                                                                                                                   |
| Test for overall effect: Z = 0.37 (P = 0.71)                                                                                                      |                                                                                                                                                                                                                                                                                                                                                                                                                                                                                                                                                                                                                                                                                                                                                                                                                                                                                                                                                                                                                                                                                                                                                                                                                                                                                                                                                                                                                                                                                                                                                                                                                                                                                                                                                                                                                                                                                                                                                                                                                                                                                                                                                                                                                                                                                                                                                                                                                                                                                  |                                       |                        |                       |                   |                                   |        |                                   |                                                          |  |  |  |  |  |  |               |    |     |     |     |       |                   |                 |    |     |     |     |       |                   |                          |  |            |  |            |               |                          |              |     |  |     |  |  |  |                                                                                                         |  |  |  |  |  |  |                                              |  |  |  |  |  |  |                                                       |  |  |  |  |  |  |               |     |     |     |     |       |                   |                 |     |     |     |     |       |                   |                          |  |            |  |            |               |                          |              |     |  |     |  |  |  |                                                                                                          |  |  |  |  |  |  |                                              |  |  |  |  |  |  |                                                                                                |  |  |  |  |  |  |                                           |                                                                                                                                                                                                                                                                   |
| Test for subgroup differences: Chi <sup>2</sup> = 0.10, df = 1 (P = 0.75), I <sup>2</sup> = 0%                                                    |                                                                                                                                                                                                                                                                                                                                                                                                                                                                                                                                                                                                                                                                                                                                                                                                                                                                                                                                                                                                                                                                                                                                                                                                                                                                                                                                                                                                                                                                                                                                                                                                                                                                                                                                                                                                                                                                                                                                                                                                                                                                                                                                                                                                                                                                                                                                                                                                                                                                                  |                                       |                        |                       |                   |                                   |        |                                   |                                                          |  |  |  |  |  |  |               |    |     |     |     |       |                   |                 |    |     |     |     |       |                   |                          |  |            |  |            |               |                          |              |     |  |     |  |  |  |                                                                                                         |  |  |  |  |  |  |                                              |  |  |  |  |  |  |                                                       |  |  |  |  |  |  |               |     |     |     |     |       |                   |                 |     |     |     |     |       |                   |                          |  |            |  |            |               |                          |              |     |  |     |  |  |  |                                                                                                          |  |  |  |  |  |  |                                              |  |  |  |  |  |  |                                                                                                |  |  |  |  |  |  |                                           |                                                                                                                                                                                                                                                                   |

| Outcome<br>№ of participants<br>(studies)                                                                                                                                                                                                                                                               | Relative effect<br>(95% CI)                                                                                                                                                                                                                                                                                                                                                                                                                                                                                                                                                                                                                                                                                                                                                                                                                                                                                                                                                                                                                                                                                                                                                                                                                                                                                                                                                                                                                                                                                                                                                                                                                                                                                                                                                                                                                                                                                                                                                                                                                                                                                                                                                                                                                                                                                                               | Anticipated absolute effects (95% CI)             |                                                                                                                                                                                                                                                                                                                     | Certainty             | What happens      |                                   |        |                                   |                                                          |  |  |  |  |  |  |               |    |     |    |     |       |                   |                 |    |     |    |     |       |                   |                          |  |            |  |            |               |                          |              |    |  |    |  |  |  |                                                                      |  |  |  |  |  |  |                                              |  |  |  |  |  |  |                                                       |  |  |  |  |  |  |               |    |     |    |     |       |                   |                 |    |     |    |     |       |                   |                          |  |            |  |            |               |                          |              |    |  |    |  |  |  |                                                                     |  |  |  |  |  |  |                                              |  |  |  |  |  |  |                                                                        |  |  |  |  |  |  |                                                     |                                                                                                                                                                                                                                                                           |
|---------------------------------------------------------------------------------------------------------------------------------------------------------------------------------------------------------------------------------------------------------------------------------------------------------|-------------------------------------------------------------------------------------------------------------------------------------------------------------------------------------------------------------------------------------------------------------------------------------------------------------------------------------------------------------------------------------------------------------------------------------------------------------------------------------------------------------------------------------------------------------------------------------------------------------------------------------------------------------------------------------------------------------------------------------------------------------------------------------------------------------------------------------------------------------------------------------------------------------------------------------------------------------------------------------------------------------------------------------------------------------------------------------------------------------------------------------------------------------------------------------------------------------------------------------------------------------------------------------------------------------------------------------------------------------------------------------------------------------------------------------------------------------------------------------------------------------------------------------------------------------------------------------------------------------------------------------------------------------------------------------------------------------------------------------------------------------------------------------------------------------------------------------------------------------------------------------------------------------------------------------------------------------------------------------------------------------------------------------------------------------------------------------------------------------------------------------------------------------------------------------------------------------------------------------------------------------------------------------------------------------------------------------------|---------------------------------------------------|---------------------------------------------------------------------------------------------------------------------------------------------------------------------------------------------------------------------------------------------------------------------------------------------------------------------|-----------------------|-------------------|-----------------------------------|--------|-----------------------------------|----------------------------------------------------------|--|--|--|--|--|--|---------------|----|-----|----|-----|-------|-------------------|-----------------|----|-----|----|-----|-------|-------------------|--------------------------|--|------------|--|------------|---------------|--------------------------|--------------|----|--|----|--|--|--|----------------------------------------------------------------------|--|--|--|--|--|--|----------------------------------------------|--|--|--|--|--|--|-------------------------------------------------------|--|--|--|--|--|--|---------------|----|-----|----|-----|-------|-------------------|-----------------|----|-----|----|-----|-------|-------------------|--------------------------|--|------------|--|------------|---------------|--------------------------|--------------|----|--|----|--|--|--|---------------------------------------------------------------------|--|--|--|--|--|--|----------------------------------------------|--|--|--|--|--|--|------------------------------------------------------------------------|--|--|--|--|--|--|-----------------------------------------------------|---------------------------------------------------------------------------------------------------------------------------------------------------------------------------------------------------------------------------------------------------------------------------|
|                                                                                                                                                                                                                                                                                                         |                                                                                                                                                                                                                                                                                                                                                                                                                                                                                                                                                                                                                                                                                                                                                                                                                                                                                                                                                                                                                                                                                                                                                                                                                                                                                                                                                                                                                                                                                                                                                                                                                                                                                                                                                                                                                                                                                                                                                                                                                                                                                                                                                                                                                                                                                                                                           |                                                   | Difference                                                                                                                                                                                                                                                                                                          |                       |                   |                                   |        |                                   |                                                          |  |  |  |  |  |  |               |    |     |    |     |       |                   |                 |    |     |    |     |       |                   |                          |  |            |  |            |               |                          |              |    |  |    |  |  |  |                                                                      |  |  |  |  |  |  |                                              |  |  |  |  |  |  |                                                       |  |  |  |  |  |  |               |    |     |    |     |       |                   |                 |    |     |    |     |       |                   |                          |  |            |  |            |               |                          |              |    |  |    |  |  |  |                                                                     |  |  |  |  |  |  |                                              |  |  |  |  |  |  |                                                                        |  |  |  |  |  |  |                                                     |                                                                                                                                                                                                                                                                           |
| <b>Serious adverse events</b><br>follow up: range 48 weeks to 56 weeks<br>№ of participants: 1525<br>(2 RCTs) <sup>1,3</sup><br><br>Importance: IMPORTANT                                                                                                                                               | <p>The proportion of patients treated with benralizumab who had any serious adverse event compared to placebo were: Eosinophil &lt; 300/uL: 11.5% versus 15.3%, RR (95%CI) = 0.73 (0.32 to 1.66), Absolute effect = 41 fewer per 1,000 (from 104 fewer to 101 more), n=515. Eosinophil ≥ 300/uL: 11.7% versus 13.6%, RR (95%CI) = 0.86 (0.62 to 1.19), Absolute effect = 19 fewer per 1,000 (from 52 fewer to 26 more), n=1010. Test for subgroup differences, p=0.71.</p> <table><tr><th>Study or Subgroup</th><th>Benralizumab<br/>Events</th><th>Benralizumab<br/>Total</th><th>Placebo<br/>Events</th><th>Placebo<br/>Total</th><th>Weight</th><th>Risk Ratio<br/>M-H, Random, 95% CI</th></tr><tr><td colspan="7"><b>6.9.1 Baseline blood eosinophils &lt;300 cells/μl</b></td></tr><tr><td>Bleecker 2016</td><td>19</td><td>129</td><td>19</td><td>140</td><td>52.9%</td><td>1.09 [0.60, 1.96]</td></tr><tr><td>FitzGerald 2016</td><td>10</td><td>124</td><td>21</td><td>122</td><td>47.1%</td><td>0.47 [0.23, 0.95]</td></tr><tr><td><b>Subtotal (95% CI)</b></td><td></td><td><b>253</b></td><td></td><td><b>262</b></td><td><b>100.0%</b></td><td><b>0.73 [0.32, 1.66]</b></td></tr><tr><td>Total events</td><td>29</td><td></td><td>40</td><td></td><td></td><td></td></tr><tr><td colspan="7">Heterogeneity: Tau² = 0.24; Chi² = 3.19, df = 1 (P = 0.07); I² = 69%</td></tr><tr><td colspan="7">Test for overall effect: Z = 0.75 (P = 0.45)</td></tr><tr><td colspan="7"><b>6.9.2 Baseline blood eosinophils ≥300 cells/μl</b></td></tr><tr><td>Bleecker 2016</td><td>33</td><td>265</td><td>36</td><td>267</td><td>54.7%</td><td>0.92 [0.59, 1.44]</td></tr><tr><td>FitzGerald 2016</td><td>25</td><td>230</td><td>34</td><td>248</td><td>45.3%</td><td>0.79 [0.49, 1.29]</td></tr><tr><td><b>Subtotal (95% CI)</b></td><td></td><td><b>495</b></td><td></td><td><b>515</b></td><td><b>100.0%</b></td><td><b>0.86 [0.62, 1.19]</b></td></tr><tr><td>Total events</td><td>58</td><td></td><td>70</td><td></td><td></td><td></td></tr><tr><td colspan="7">Heterogeneity: Tau² = 0.00; Chi² = 0.21, df = 1 (P = 0.65); I² = 0%</td></tr><tr><td colspan="7">Test for overall effect: Z = 0.89 (P = 0.37)</td></tr><tr><td colspan="7">Test for subgroup differences: Chi² = 0.13, df = 1 (P = 0.71), I² = 0%</td></tr></table> | Study or Subgroup                                 | Benralizumab<br>Events                                                                                                                                                                                                                                                                                              | Benralizumab<br>Total | Placebo<br>Events | Placebo<br>Total                  | Weight | Risk Ratio<br>M-H, Random, 95% CI | <b>6.9.1 Baseline blood eosinophils &lt;300 cells/μl</b> |  |  |  |  |  |  | Bleecker 2016 | 19 | 129 | 19 | 140 | 52.9% | 1.09 [0.60, 1.96] | FitzGerald 2016 | 10 | 124 | 21 | 122 | 47.1% | 0.47 [0.23, 0.95] | <b>Subtotal (95% CI)</b> |  | <b>253</b> |  | <b>262</b> | <b>100.0%</b> | <b>0.73 [0.32, 1.66]</b> | Total events | 29 |  | 40 |  |  |  | Heterogeneity: Tau² = 0.24; Chi² = 3.19, df = 1 (P = 0.07); I² = 69% |  |  |  |  |  |  | Test for overall effect: Z = 0.75 (P = 0.45) |  |  |  |  |  |  | <b>6.9.2 Baseline blood eosinophils ≥300 cells/μl</b> |  |  |  |  |  |  | Bleecker 2016 | 33 | 265 | 36 | 267 | 54.7% | 0.92 [0.59, 1.44] | FitzGerald 2016 | 25 | 230 | 34 | 248 | 45.3% | 0.79 [0.49, 1.29] | <b>Subtotal (95% CI)</b> |  | <b>495</b> |  | <b>515</b> | <b>100.0%</b> | <b>0.86 [0.62, 1.19]</b> | Total events | 58 |  | 70 |  |  |  | Heterogeneity: Tau² = 0.00; Chi² = 0.21, df = 1 (P = 0.65); I² = 0% |  |  |  |  |  |  | Test for overall effect: Z = 0.89 (P = 0.37) |  |  |  |  |  |  | Test for subgroup differences: Chi² = 0.13, df = 1 (P = 0.71), I² = 0% |  |  |  |  |  |  | <p>⊕○○○<br/>○<br/>VERY<br/>LOW <sup>1,3,p</sup></p> | <p>There is no significant increase in the incidence of serious adverse events with benralizumab compared to placebo in patients with baseline blood eosinophil counts &lt;300/μL and ≥300/ μL. There are no statistically significant differences between subgroups.</p> |
| Study or Subgroup                                                                                                                                                                                                                                                                                       | Benralizumab<br>Events                                                                                                                                                                                                                                                                                                                                                                                                                                                                                                                                                                                                                                                                                                                                                                                                                                                                                                                                                                                                                                                                                                                                                                                                                                                                                                                                                                                                                                                                                                                                                                                                                                                                                                                                                                                                                                                                                                                                                                                                                                                                                                                                                                                                                                                                                                                    | Benralizumab<br>Total                             | Placebo<br>Events                                                                                                                                                                                                                                                                                                   | Placebo<br>Total      | Weight            | Risk Ratio<br>M-H, Random, 95% CI |        |                                   |                                                          |  |  |  |  |  |  |               |    |     |    |     |       |                   |                 |    |     |    |     |       |                   |                          |  |            |  |            |               |                          |              |    |  |    |  |  |  |                                                                      |  |  |  |  |  |  |                                              |  |  |  |  |  |  |                                                       |  |  |  |  |  |  |               |    |     |    |     |       |                   |                 |    |     |    |     |       |                   |                          |  |            |  |            |               |                          |              |    |  |    |  |  |  |                                                                     |  |  |  |  |  |  |                                              |  |  |  |  |  |  |                                                                        |  |  |  |  |  |  |                                                     |                                                                                                                                                                                                                                                                           |
| <b>6.9.1 Baseline blood eosinophils &lt;300 cells/μl</b>                                                                                                                                                                                                                                                |                                                                                                                                                                                                                                                                                                                                                                                                                                                                                                                                                                                                                                                                                                                                                                                                                                                                                                                                                                                                                                                                                                                                                                                                                                                                                                                                                                                                                                                                                                                                                                                                                                                                                                                                                                                                                                                                                                                                                                                                                                                                                                                                                                                                                                                                                                                                           |                                                   |                                                                                                                                                                                                                                                                                                                     |                       |                   |                                   |        |                                   |                                                          |  |  |  |  |  |  |               |    |     |    |     |       |                   |                 |    |     |    |     |       |                   |                          |  |            |  |            |               |                          |              |    |  |    |  |  |  |                                                                      |  |  |  |  |  |  |                                              |  |  |  |  |  |  |                                                       |  |  |  |  |  |  |               |    |     |    |     |       |                   |                 |    |     |    |     |       |                   |                          |  |            |  |            |               |                          |              |    |  |    |  |  |  |                                                                     |  |  |  |  |  |  |                                              |  |  |  |  |  |  |                                                                        |  |  |  |  |  |  |                                                     |                                                                                                                                                                                                                                                                           |
| Bleecker 2016                                                                                                                                                                                                                                                                                           | 19                                                                                                                                                                                                                                                                                                                                                                                                                                                                                                                                                                                                                                                                                                                                                                                                                                                                                                                                                                                                                                                                                                                                                                                                                                                                                                                                                                                                                                                                                                                                                                                                                                                                                                                                                                                                                                                                                                                                                                                                                                                                                                                                                                                                                                                                                                                                        | 129                                               | 19                                                                                                                                                                                                                                                                                                                  | 140                   | 52.9%             | 1.09 [0.60, 1.96]                 |        |                                   |                                                          |  |  |  |  |  |  |               |    |     |    |     |       |                   |                 |    |     |    |     |       |                   |                          |  |            |  |            |               |                          |              |    |  |    |  |  |  |                                                                      |  |  |  |  |  |  |                                              |  |  |  |  |  |  |                                                       |  |  |  |  |  |  |               |    |     |    |     |       |                   |                 |    |     |    |     |       |                   |                          |  |            |  |            |               |                          |              |    |  |    |  |  |  |                                                                     |  |  |  |  |  |  |                                              |  |  |  |  |  |  |                                                                        |  |  |  |  |  |  |                                                     |                                                                                                                                                                                                                                                                           |
| FitzGerald 2016                                                                                                                                                                                                                                                                                         | 10                                                                                                                                                                                                                                                                                                                                                                                                                                                                                                                                                                                                                                                                                                                                                                                                                                                                                                                                                                                                                                                                                                                                                                                                                                                                                                                                                                                                                                                                                                                                                                                                                                                                                                                                                                                                                                                                                                                                                                                                                                                                                                                                                                                                                                                                                                                                        | 124                                               | 21                                                                                                                                                                                                                                                                                                                  | 122                   | 47.1%             | 0.47 [0.23, 0.95]                 |        |                                   |                                                          |  |  |  |  |  |  |               |    |     |    |     |       |                   |                 |    |     |    |     |       |                   |                          |  |            |  |            |               |                          |              |    |  |    |  |  |  |                                                                      |  |  |  |  |  |  |                                              |  |  |  |  |  |  |                                                       |  |  |  |  |  |  |               |    |     |    |     |       |                   |                 |    |     |    |     |       |                   |                          |  |            |  |            |               |                          |              |    |  |    |  |  |  |                                                                     |  |  |  |  |  |  |                                              |  |  |  |  |  |  |                                                                        |  |  |  |  |  |  |                                                     |                                                                                                                                                                                                                                                                           |
| <b>Subtotal (95% CI)</b>                                                                                                                                                                                                                                                                                |                                                                                                                                                                                                                                                                                                                                                                                                                                                                                                                                                                                                                                                                                                                                                                                                                                                                                                                                                                                                                                                                                                                                                                                                                                                                                                                                                                                                                                                                                                                                                                                                                                                                                                                                                                                                                                                                                                                                                                                                                                                                                                                                                                                                                                                                                                                                           | <b>253</b>                                        |                                                                                                                                                                                                                                                                                                                     | <b>262</b>            | <b>100.0%</b>     | <b>0.73 [0.32, 1.66]</b>          |        |                                   |                                                          |  |  |  |  |  |  |               |    |     |    |     |       |                   |                 |    |     |    |     |       |                   |                          |  |            |  |            |               |                          |              |    |  |    |  |  |  |                                                                      |  |  |  |  |  |  |                                              |  |  |  |  |  |  |                                                       |  |  |  |  |  |  |               |    |     |    |     |       |                   |                 |    |     |    |     |       |                   |                          |  |            |  |            |               |                          |              |    |  |    |  |  |  |                                                                     |  |  |  |  |  |  |                                              |  |  |  |  |  |  |                                                                        |  |  |  |  |  |  |                                                     |                                                                                                                                                                                                                                                                           |
| Total events                                                                                                                                                                                                                                                                                            | 29                                                                                                                                                                                                                                                                                                                                                                                                                                                                                                                                                                                                                                                                                                                                                                                                                                                                                                                                                                                                                                                                                                                                                                                                                                                                                                                                                                                                                                                                                                                                                                                                                                                                                                                                                                                                                                                                                                                                                                                                                                                                                                                                                                                                                                                                                                                                        |                                                   | 40                                                                                                                                                                                                                                                                                                                  |                       |                   |                                   |        |                                   |                                                          |  |  |  |  |  |  |               |    |     |    |     |       |                   |                 |    |     |    |     |       |                   |                          |  |            |  |            |               |                          |              |    |  |    |  |  |  |                                                                      |  |  |  |  |  |  |                                              |  |  |  |  |  |  |                                                       |  |  |  |  |  |  |               |    |     |    |     |       |                   |                 |    |     |    |     |       |                   |                          |  |            |  |            |               |                          |              |    |  |    |  |  |  |                                                                     |  |  |  |  |  |  |                                              |  |  |  |  |  |  |                                                                        |  |  |  |  |  |  |                                                     |                                                                                                                                                                                                                                                                           |
| Heterogeneity: Tau² = 0.24; Chi² = 3.19, df = 1 (P = 0.07); I² = 69%                                                                                                                                                                                                                                    |                                                                                                                                                                                                                                                                                                                                                                                                                                                                                                                                                                                                                                                                                                                                                                                                                                                                                                                                                                                                                                                                                                                                                                                                                                                                                                                                                                                                                                                                                                                                                                                                                                                                                                                                                                                                                                                                                                                                                                                                                                                                                                                                                                                                                                                                                                                                           |                                                   |                                                                                                                                                                                                                                                                                                                     |                       |                   |                                   |        |                                   |                                                          |  |  |  |  |  |  |               |    |     |    |     |       |                   |                 |    |     |    |     |       |                   |                          |  |            |  |            |               |                          |              |    |  |    |  |  |  |                                                                      |  |  |  |  |  |  |                                              |  |  |  |  |  |  |                                                       |  |  |  |  |  |  |               |    |     |    |     |       |                   |                 |    |     |    |     |       |                   |                          |  |            |  |            |               |                          |              |    |  |    |  |  |  |                                                                     |  |  |  |  |  |  |                                              |  |  |  |  |  |  |                                                                        |  |  |  |  |  |  |                                                     |                                                                                                                                                                                                                                                                           |
| Test for overall effect: Z = 0.75 (P = 0.45)                                                                                                                                                                                                                                                            |                                                                                                                                                                                                                                                                                                                                                                                                                                                                                                                                                                                                                                                                                                                                                                                                                                                                                                                                                                                                                                                                                                                                                                                                                                                                                                                                                                                                                                                                                                                                                                                                                                                                                                                                                                                                                                                                                                                                                                                                                                                                                                                                                                                                                                                                                                                                           |                                                   |                                                                                                                                                                                                                                                                                                                     |                       |                   |                                   |        |                                   |                                                          |  |  |  |  |  |  |               |    |     |    |     |       |                   |                 |    |     |    |     |       |                   |                          |  |            |  |            |               |                          |              |    |  |    |  |  |  |                                                                      |  |  |  |  |  |  |                                              |  |  |  |  |  |  |                                                       |  |  |  |  |  |  |               |    |     |    |     |       |                   |                 |    |     |    |     |       |                   |                          |  |            |  |            |               |                          |              |    |  |    |  |  |  |                                                                     |  |  |  |  |  |  |                                              |  |  |  |  |  |  |                                                                        |  |  |  |  |  |  |                                                     |                                                                                                                                                                                                                                                                           |
| <b>6.9.2 Baseline blood eosinophils ≥300 cells/μl</b>                                                                                                                                                                                                                                                   |                                                                                                                                                                                                                                                                                                                                                                                                                                                                                                                                                                                                                                                                                                                                                                                                                                                                                                                                                                                                                                                                                                                                                                                                                                                                                                                                                                                                                                                                                                                                                                                                                                                                                                                                                                                                                                                                                                                                                                                                                                                                                                                                                                                                                                                                                                                                           |                                                   |                                                                                                                                                                                                                                                                                                                     |                       |                   |                                   |        |                                   |                                                          |  |  |  |  |  |  |               |    |     |    |     |       |                   |                 |    |     |    |     |       |                   |                          |  |            |  |            |               |                          |              |    |  |    |  |  |  |                                                                      |  |  |  |  |  |  |                                              |  |  |  |  |  |  |                                                       |  |  |  |  |  |  |               |    |     |    |     |       |                   |                 |    |     |    |     |       |                   |                          |  |            |  |            |               |                          |              |    |  |    |  |  |  |                                                                     |  |  |  |  |  |  |                                              |  |  |  |  |  |  |                                                                        |  |  |  |  |  |  |                                                     |                                                                                                                                                                                                                                                                           |
| Bleecker 2016                                                                                                                                                                                                                                                                                           | 33                                                                                                                                                                                                                                                                                                                                                                                                                                                                                                                                                                                                                                                                                                                                                                                                                                                                                                                                                                                                                                                                                                                                                                                                                                                                                                                                                                                                                                                                                                                                                                                                                                                                                                                                                                                                                                                                                                                                                                                                                                                                                                                                                                                                                                                                                                                                        | 265                                               | 36                                                                                                                                                                                                                                                                                                                  | 267                   | 54.7%             | 0.92 [0.59, 1.44]                 |        |                                   |                                                          |  |  |  |  |  |  |               |    |     |    |     |       |                   |                 |    |     |    |     |       |                   |                          |  |            |  |            |               |                          |              |    |  |    |  |  |  |                                                                      |  |  |  |  |  |  |                                              |  |  |  |  |  |  |                                                       |  |  |  |  |  |  |               |    |     |    |     |       |                   |                 |    |     |    |     |       |                   |                          |  |            |  |            |               |                          |              |    |  |    |  |  |  |                                                                     |  |  |  |  |  |  |                                              |  |  |  |  |  |  |                                                                        |  |  |  |  |  |  |                                                     |                                                                                                                                                                                                                                                                           |
| FitzGerald 2016                                                                                                                                                                                                                                                                                         | 25                                                                                                                                                                                                                                                                                                                                                                                                                                                                                                                                                                                                                                                                                                                                                                                                                                                                                                                                                                                                                                                                                                                                                                                                                                                                                                                                                                                                                                                                                                                                                                                                                                                                                                                                                                                                                                                                                                                                                                                                                                                                                                                                                                                                                                                                                                                                        | 230                                               | 34                                                                                                                                                                                                                                                                                                                  | 248                   | 45.3%             | 0.79 [0.49, 1.29]                 |        |                                   |                                                          |  |  |  |  |  |  |               |    |     |    |     |       |                   |                 |    |     |    |     |       |                   |                          |  |            |  |            |               |                          |              |    |  |    |  |  |  |                                                                      |  |  |  |  |  |  |                                              |  |  |  |  |  |  |                                                       |  |  |  |  |  |  |               |    |     |    |     |       |                   |                 |    |     |    |     |       |                   |                          |  |            |  |            |               |                          |              |    |  |    |  |  |  |                                                                     |  |  |  |  |  |  |                                              |  |  |  |  |  |  |                                                                        |  |  |  |  |  |  |                                                     |                                                                                                                                                                                                                                                                           |
| <b>Subtotal (95% CI)</b>                                                                                                                                                                                                                                                                                |                                                                                                                                                                                                                                                                                                                                                                                                                                                                                                                                                                                                                                                                                                                                                                                                                                                                                                                                                                                                                                                                                                                                                                                                                                                                                                                                                                                                                                                                                                                                                                                                                                                                                                                                                                                                                                                                                                                                                                                                                                                                                                                                                                                                                                                                                                                                           | <b>495</b>                                        |                                                                                                                                                                                                                                                                                                                     | <b>515</b>            | <b>100.0%</b>     | <b>0.86 [0.62, 1.19]</b>          |        |                                   |                                                          |  |  |  |  |  |  |               |    |     |    |     |       |                   |                 |    |     |    |     |       |                   |                          |  |            |  |            |               |                          |              |    |  |    |  |  |  |                                                                      |  |  |  |  |  |  |                                              |  |  |  |  |  |  |                                                       |  |  |  |  |  |  |               |    |     |    |     |       |                   |                 |    |     |    |     |       |                   |                          |  |            |  |            |               |                          |              |    |  |    |  |  |  |                                                                     |  |  |  |  |  |  |                                              |  |  |  |  |  |  |                                                                        |  |  |  |  |  |  |                                                     |                                                                                                                                                                                                                                                                           |
| Total events                                                                                                                                                                                                                                                                                            | 58                                                                                                                                                                                                                                                                                                                                                                                                                                                                                                                                                                                                                                                                                                                                                                                                                                                                                                                                                                                                                                                                                                                                                                                                                                                                                                                                                                                                                                                                                                                                                                                                                                                                                                                                                                                                                                                                                                                                                                                                                                                                                                                                                                                                                                                                                                                                        |                                                   | 70                                                                                                                                                                                                                                                                                                                  |                       |                   |                                   |        |                                   |                                                          |  |  |  |  |  |  |               |    |     |    |     |       |                   |                 |    |     |    |     |       |                   |                          |  |            |  |            |               |                          |              |    |  |    |  |  |  |                                                                      |  |  |  |  |  |  |                                              |  |  |  |  |  |  |                                                       |  |  |  |  |  |  |               |    |     |    |     |       |                   |                 |    |     |    |     |       |                   |                          |  |            |  |            |               |                          |              |    |  |    |  |  |  |                                                                     |  |  |  |  |  |  |                                              |  |  |  |  |  |  |                                                                        |  |  |  |  |  |  |                                                     |                                                                                                                                                                                                                                                                           |
| Heterogeneity: Tau² = 0.00; Chi² = 0.21, df = 1 (P = 0.65); I² = 0%                                                                                                                                                                                                                                     |                                                                                                                                                                                                                                                                                                                                                                                                                                                                                                                                                                                                                                                                                                                                                                                                                                                                                                                                                                                                                                                                                                                                                                                                                                                                                                                                                                                                                                                                                                                                                                                                                                                                                                                                                                                                                                                                                                                                                                                                                                                                                                                                                                                                                                                                                                                                           |                                                   |                                                                                                                                                                                                                                                                                                                     |                       |                   |                                   |        |                                   |                                                          |  |  |  |  |  |  |               |    |     |    |     |       |                   |                 |    |     |    |     |       |                   |                          |  |            |  |            |               |                          |              |    |  |    |  |  |  |                                                                      |  |  |  |  |  |  |                                              |  |  |  |  |  |  |                                                       |  |  |  |  |  |  |               |    |     |    |     |       |                   |                 |    |     |    |     |       |                   |                          |  |            |  |            |               |                          |              |    |  |    |  |  |  |                                                                     |  |  |  |  |  |  |                                              |  |  |  |  |  |  |                                                                        |  |  |  |  |  |  |                                                     |                                                                                                                                                                                                                                                                           |
| Test for overall effect: Z = 0.89 (P = 0.37)                                                                                                                                                                                                                                                            |                                                                                                                                                                                                                                                                                                                                                                                                                                                                                                                                                                                                                                                                                                                                                                                                                                                                                                                                                                                                                                                                                                                                                                                                                                                                                                                                                                                                                                                                                                                                                                                                                                                                                                                                                                                                                                                                                                                                                                                                                                                                                                                                                                                                                                                                                                                                           |                                                   |                                                                                                                                                                                                                                                                                                                     |                       |                   |                                   |        |                                   |                                                          |  |  |  |  |  |  |               |    |     |    |     |       |                   |                 |    |     |    |     |       |                   |                          |  |            |  |            |               |                          |              |    |  |    |  |  |  |                                                                      |  |  |  |  |  |  |                                              |  |  |  |  |  |  |                                                       |  |  |  |  |  |  |               |    |     |    |     |       |                   |                 |    |     |    |     |       |                   |                          |  |            |  |            |               |                          |              |    |  |    |  |  |  |                                                                     |  |  |  |  |  |  |                                              |  |  |  |  |  |  |                                                                        |  |  |  |  |  |  |                                                     |                                                                                                                                                                                                                                                                           |
| Test for subgroup differences: Chi² = 0.13, df = 1 (P = 0.71), I² = 0%                                                                                                                                                                                                                                  |                                                                                                                                                                                                                                                                                                                                                                                                                                                                                                                                                                                                                                                                                                                                                                                                                                                                                                                                                                                                                                                                                                                                                                                                                                                                                                                                                                                                                                                                                                                                                                                                                                                                                                                                                                                                                                                                                                                                                                                                                                                                                                                                                                                                                                                                                                                                           |                                                   |                                                                                                                                                                                                                                                                                                                     |                       |                   |                                   |        |                                   |                                                          |  |  |  |  |  |  |               |    |     |    |     |       |                   |                 |    |     |    |     |       |                   |                          |  |            |  |            |               |                          |              |    |  |    |  |  |  |                                                                      |  |  |  |  |  |  |                                              |  |  |  |  |  |  |                                                       |  |  |  |  |  |  |               |    |     |    |     |       |                   |                 |    |     |    |     |       |                   |                          |  |            |  |            |               |                          |              |    |  |    |  |  |  |                                                                     |  |  |  |  |  |  |                                              |  |  |  |  |  |  |                                                                        |  |  |  |  |  |  |                                                     |                                                                                                                                                                                                                                                                           |
| <b>Systemic steroids (absolute final dose)</b><br>follow up: 28 weeks<br>№ of participants: 148<br>(1 RCT) <sup>5</sup><br><b><u>Study participants meet criteria for the diagnosis of severe asthma defined by the ERS/ATS Guidelines on Severe Asthma<sup>7</sup></u></b><br><br>Importance: CRITICAL | <p>The median oral glucocorticoid dose (range) at the final visit (week 28) in the subgroup with baseline blood eosinophils ≥150 to &lt;300/μL was: 5.0 mg/day (0.0–15.0) in patients who received placebo (n=11) and 6.25 mg/day (0.0–30.0) in patients who received benralizumab (n=12). In the subgroup with baseline blood eosinophils ≥300/μL: 10.0 mg/day (0.0–40.0) in patients who received placebo (n=64) and 5.0 mg/day (0.0–25.0) in patients who received benralizumab (n=61). No statistical test comparing results has been reported.</p>                                                                                                                                                                                                                                                                                                                                                                                                                                                                                                                                                                                                                                                                                                                                                                                                                                                                                                                                                                                                                                                                                                                                                                                                                                                                                                                                                                                                                                                                                                                                                                                                                                                                                                                                                                                   | <p>⊕○○○<br/>○<br/>VERY<br/>LOW <sup>q,r</sup></p> | <p>Oral glucocorticoid dose is 5 mg/day less with benralizumab compared to placebo in the subgroup with baseline blood eosinophils ≥300/μL whereas in the subgroup with baseline blood eosinophils ≥150 to &lt;300/μL oral glucocorticoid dose is 1.25 mg/day less with placebo. No statistical test available.</p> |                       |                   |                                   |        |                                   |                                                          |  |  |  |  |  |  |               |    |     |    |     |       |                   |                 |    |     |    |     |       |                   |                          |  |            |  |            |               |                          |              |    |  |    |  |  |  |                                                                      |  |  |  |  |  |  |                                              |  |  |  |  |  |  |                                                       |  |  |  |  |  |  |               |    |     |    |     |       |                   |                 |    |     |    |     |       |                   |                          |  |            |  |            |               |                          |              |    |  |    |  |  |  |                                                                     |  |  |  |  |  |  |                                              |  |  |  |  |  |  |                                                                        |  |  |  |  |  |  |                                                     |                                                                                                                                                                                                                                                                           |

| Outcome<br>№ of participants<br>(studies)                                                                                                                                                                                                                                                  | Relative effect<br>(95% CI) | Anticipated absolute effects (95% CI)                                                                                                                                                                                                                                                                                                                                                                                                                                                                                                                                          |  |            | Certainty                           | What happens                                                                                                                                                                                                                                                                                                                                                                        |
|--------------------------------------------------------------------------------------------------------------------------------------------------------------------------------------------------------------------------------------------------------------------------------------------|-----------------------------|--------------------------------------------------------------------------------------------------------------------------------------------------------------------------------------------------------------------------------------------------------------------------------------------------------------------------------------------------------------------------------------------------------------------------------------------------------------------------------------------------------------------------------------------------------------------------------|--|------------|-------------------------------------|-------------------------------------------------------------------------------------------------------------------------------------------------------------------------------------------------------------------------------------------------------------------------------------------------------------------------------------------------------------------------------------|
|                                                                                                                                                                                                                                                                                            |                             |                                                                                                                                                                                                                                                                                                                                                                                                                                                                                                                                                                                |  | Difference |                                     |                                                                                                                                                                                                                                                                                                                                                                                     |
| <b>Systemic steroids (percent reduction)</b><br>follow up: 28 weeks<br>№ of participants: 148<br>(1 RCT) <sup>5</sup><br><u>Study participants meet criteria for the diagnosis of severe asthma defined by the ERS/ATS Guidelines on Severe Asthma<sup>7</sup></u><br>Importance: CRITICAL |                             | The median reduction in final oral glucocorticoid dose compared with baseline (range, %) in the subgroup with baseline blood eosinophils $\geq 150$ to $<300/\mu\text{L}$ was: 50.0% (0.0–100) in patients who received placebo (n=11) and 57.5% (-50.0–100) in patients who received benralizumab (n=12). In the subgroup with baseline blood eosinophils $\geq 300/\mu\text{L}$ : 0.0% (-150 to 100) in patients who received placebo (n=64) and 75.0% (-50.0 to 100) in patients who received benralizumab (n=61). No statistical test comparing results has been reported. |  |            | ⊕○○<br>○<br>VERY LOW <sup>q,r</sup> | There were similar oral glucocorticoid dose reduction with benralizumab or placebo in the subgroup with baseline blood eosinophils $\geq 150$ to $<300/\mu\text{L}$ (50% and 57.7%) whereas in the subgroup with baseline blood eosinophils $\geq 300/\mu\text{L}$ the oral glucocorticoid dose reduction was 0% in placebo and 75% in benralizumab. No statistical test available. |

CI: Confidence interval; FEV1: forced expiratory volume in 1 second; MCID: minimal clinically important difference; MD: Mean difference; SMD: Standardised mean difference; RCT: randomised controlled trial; RR: Risk ratio

#### GRADE Working Group grades of evidence

**High certainty:** We are very confident that the true effect lies close to that of the estimate of the effect

**Moderate certainty:** We are moderately confident in the effect estimate: The true effect is likely to be close to the estimate of the effect, but there is a possibility that it is substantially different

**Low certainty:** Our confidence in the effect estimate is limited: The true effect may be substantially different from the estimate of the effect

**Very low certainty:** We have very little confidence in the effect estimate: The true effect is likely to be substantially different from the estimate of effect

## Explanations

- Potential risk of bias associated with selective outcome reporting bias (ad hoc subgroup analysis in participants with blood eosinophil counts  $<300/\mu\text{L}$  in Castro 2014 ).
- Three studies (Bleecker 2016, Castro 2014 and FitzGerald 2016) included a mixed population of patients with moderate and severe asthma.
- A single study reported results for the subgroup with blood eosinophils counts  $<300/\mu\text{L}$ . This analysis included only 55 patients (4 in benralizumab arm and 51 in placebo arm).
- Potential risk of bias associated with selective outcome reporting bias in participants with eosinophil counts  $<300/\mu\text{L}$  (ad hoc subgroup analysis in Castro 2014; analysis not specified in protocols of Bleecker 2016 and FitzGerald 2016).
- The study included a mixed population of patients with moderate and severe asthma.
- For both subgroups the ends of the 95% confidence interval include appreciable clinical harm (MCID = 0.5) and no benefit and could lead to opposite clinical decisions. Results from single study with only 51 patients.

- g. Potential risk of bias associated with selective outcome reporting bias in participants with baseline blood eosinophil counts <300 cells/μl: ad hoc subgroup analysis in Castro 2014; additional analysis in patients with blood eosinophil counts <150/μL, 150-299/μL, 300-449/μL and ≥450/μL were stated in the protocol but not reported by Bleecker 2016 and FitzGerald 2016.
- h. For the subgroup with baseline blood eosinophils <300 cells/μl the ends of the 95% confidence interval include appreciable clinical benefit and no benefit and could lead to opposite clinical decision.
- i. FEV1% was not specified as pre- or post-bronchodilator in Park 2016 but we have assumed it to be pre-bronchodilator.
- j. For both subgroups the ends of the 95% confidence interval include appreciable clinical harm (MCID = 10.38%) and no benefit and could lead to opposite clinical decisions. Results from single study with only 51 patients.
- k.  $I^2=65\%$  ( $p=0.09$ ) may represent substantial statistical heterogeneity in the subgroup with baseline eosinophil count ≥300 cells/μl.
- l. The studies included a mixed population of patients with moderate and severe asthma.
- m. This judgement was based on a arbitrary clinical decision threshold of 15% increase or decrease in absolute effect.
- n. There was a high incidence of adverse events in both benralizumab and placebo groups. The apparent benefit from benralizumab might be explained by a reduction of asthma-related adverse events with the active drug.
- o.  $I^2=69\%$  ( $p=0.07$ ) may represent substantial statistical heterogeneity in the subgroup with baseline eosinophil count <300 cells/μl.
- p. This judgement was based on a arbitrary clinical decision threshold of 10% increase or decrease in absolute effect in the subgroup with baseline blood eosinophil count <300 cells/μl.
- q. Potential risk of bias associated with selective outcome reporting bias: the protocol for Nair 2017 specified that percentage reduction in oral glucocorticoid dose would be summarized by treatment group in patients with baseline blood eosinophil counts 150-299/μL, ≥300/μL, 300-450/μL and >450/μL separately. However results have not been reported for patients with 300-450 eosinophils/μL and >450 eosinophils/μL.
- r. 95% confidence intervals could not be obtained and data from single study including only 148 patients.

## References

1. Fitzgerald JM, Bleecker ER, Nair P, et al. Benralizumab, an anti-interleukin-5 receptor alpha monoclonal antibody, as add-on treatment for patients with severe, uncontrolled, eosinophilic asthma (CALIMA): a randomised, double-blind, placebo-controlled phase 3 trial. *Lancet* 2016; 388: 2128–2141.
2. Castro M, Wenzel SE, Bleecker ER, et al. Benralizumab, an anti-interleukin 5 receptor [alpha] monoclonal antibody, versus placebo for uncontrolled eosinophilic asthma: a phase 2b randomised dose-ranging study. *Lancet Respiratory Medicine* 2014; 2: 878–890.
3. Bleecker ER, FitzGerald JM, Chanez P, et al. Efficacy and safety of benralizumab for patients with severe asthma uncontrolled with high-dosage inhaled corticosteroids and long-acting β2-agonists (SIROCCO): a randomised, multicentre, placebo-controlled phase 3 trial. *Lancet* 2016; 388: 2115–2127..
4. Park HS, Kim MK, Imai N, Nakanishi T, Adachi M, Ohta K, Tohda Y. A Phase 2a Study of Benralizumab for Patients with Eosinophilic Asthma in South Korea and Japan. *Int Arch Allergy Immunol* 2016; 169:135-145.
5. Nair P, Wenzel SE, Rabe KF, et al. Oral Glucocorticoid-Sparing Effect of Benralizumab in Severe Asthma. *New England Journal of Medicine* 2017; 376: 2448-2458.
6. Santanello NC, Zhang J, Seidenberg B, Reiss TF, Barber BL. What are minimal important changes for asthma measures in a clinical trial? *Eur Respir J* 1999; 14: 23-27.
7. Chung KF, Wenzel SE, Brozek JL, et al. International ERS/ATS guidelines on definition, evaluation and treatment of severe asthma. *Eur Respir J* 2014; 43: 343-373.

GRADE Evidence Profile: RESLIZUMAB (according to baseline number of blood eosinophils)

| Outcome<br>№ of participants<br>(studies)                                                                                                                                                                                                                                                                                                                                                                                                       | Relative effect<br>(95% CI)                                                                                                                                                                                                                                                                                         | Anticipated absolute effects (95% CI)                                                                                                                                                                                                                                                                                                                                                                                                                                                                                                                                                                                                                                                                                                                                                                                                                                                                                                                                                                                                                                                                                                                                                                                                                                                                                                                                                                                                                                                                                                                                                                                                                                                                                                                                                                                                                                |                  |               | Certainty         | What happens                       |    |                  |               |        |                                    |                                                          |  |  |  |  |  |  |             |        |        |     |    |        |                     |                          |  |  |            |           |               |                            |                                                                               |  |  |  |  |  |  |                                                       |  |  |  |  |  |  |              |        |        |     |     |       |                      |                          |       |        |           |           |              |                            |                                                                               |       |        |     |     |       |                      |                       |       |        |           |           |               |                            |                                                                                                                                                                                                                                      |  |  |            |            |               |                             |                                                                                                                                                            |                                                                                                                                                                                                                                                                         |  |  |  |  |  |                                                                                                   |  |  |  |  |  |  |                                |                                                                                                                                                                                                                                                                                   |
|-------------------------------------------------------------------------------------------------------------------------------------------------------------------------------------------------------------------------------------------------------------------------------------------------------------------------------------------------------------------------------------------------------------------------------------------------|---------------------------------------------------------------------------------------------------------------------------------------------------------------------------------------------------------------------------------------------------------------------------------------------------------------------|----------------------------------------------------------------------------------------------------------------------------------------------------------------------------------------------------------------------------------------------------------------------------------------------------------------------------------------------------------------------------------------------------------------------------------------------------------------------------------------------------------------------------------------------------------------------------------------------------------------------------------------------------------------------------------------------------------------------------------------------------------------------------------------------------------------------------------------------------------------------------------------------------------------------------------------------------------------------------------------------------------------------------------------------------------------------------------------------------------------------------------------------------------------------------------------------------------------------------------------------------------------------------------------------------------------------------------------------------------------------------------------------------------------------------------------------------------------------------------------------------------------------------------------------------------------------------------------------------------------------------------------------------------------------------------------------------------------------------------------------------------------------------------------------------------------------------------------------------------------------|------------------|---------------|-------------------|------------------------------------|----|------------------|---------------|--------|------------------------------------|----------------------------------------------------------|--|--|--|--|--|--|-------------|--------|--------|-----|----|--------|---------------------|--------------------------|--|--|------------|-----------|---------------|----------------------------|-------------------------------------------------------------------------------|--|--|--|--|--|--|-------------------------------------------------------|--|--|--|--|--|--|--------------|--------|--------|-----|-----|-------|----------------------|--------------------------|-------|--------|-----------|-----------|--------------|----------------------------|-------------------------------------------------------------------------------|-------|--------|-----|-----|-------|----------------------|-----------------------|-------|--------|-----------|-----------|---------------|----------------------------|--------------------------------------------------------------------------------------------------------------------------------------------------------------------------------------------------------------------------------------|--|--|------------|------------|---------------|-----------------------------|------------------------------------------------------------------------------------------------------------------------------------------------------------|-------------------------------------------------------------------------------------------------------------------------------------------------------------------------------------------------------------------------------------------------------------------------|--|--|--|--|--|---------------------------------------------------------------------------------------------------|--|--|--|--|--|--|--------------------------------|-----------------------------------------------------------------------------------------------------------------------------------------------------------------------------------------------------------------------------------------------------------------------------------|
|                                                                                                                                                                                                                                                                                                                                                                                                                                                 |                                                                                                                                                                                                                                                                                                                     |                                                                                                                                                                                                                                                                                                                                                                                                                                                                                                                                                                                                                                                                                                                                                                                                                                                                                                                                                                                                                                                                                                                                                                                                                                                                                                                                                                                                                                                                                                                                                                                                                                                                                                                                                                                                                                                                      |                  | Difference    |                   |                                    |    |                  |               |        |                                    |                                                          |  |  |  |  |  |  |             |        |        |     |    |        |                     |                          |  |  |            |           |               |                            |                                                                               |  |  |  |  |  |  |                                                       |  |  |  |  |  |  |              |        |        |     |     |       |                      |                          |       |        |           |           |              |                            |                                                                               |       |        |     |     |       |                      |                       |       |        |           |           |               |                            |                                                                                                                                                                                                                                      |  |  |            |            |               |                             |                                                                                                                                                            |                                                                                                                                                                                                                                                                         |  |  |  |  |  |                                                                                                   |  |  |  |  |  |  |                                |                                                                                                                                                                                                                                                                                   |
| <p><b>Asthma control (change from baseline)</b><br/>assessed with: Asthma Control Questionnaire (ACQ-7); Scale from: 0 to 6; lower values indicate better asthma control; MCID 0.5<br/>follow up: range 16 weeks to 52 weeks<br/>№ of participants: 1645<br/>(4 RCTs) <sup>1,2,3</sup></p> <p>Importance: CRITICAL</p>                                                                                                                          | <p>Mean change from baseline in ACQ-7 score in patients treated with reslizumab compared to placebo were: Eosinophil &lt;400/μL: Mean difference (95% CI) = -0.12 (-0.33 to 0.09), n=392; Eosinophil ≥400/μL: Mean difference (95% CI) = -0.27 (-0.36 to -0.19), n=1253. Test for subgroup differences, p=0.19.</p> | <table border="1"> <thead> <tr> <th>Study or Subgroup</th><th>Mean Difference</th><th>SE</th><th>Reslizumab Total</th><th>Placebo Total</th><th>Weight</th><th>Mean Difference IV, Random, 95% CI</th></tr> </thead> <tbody> <tr> <td colspan="7"><b>7.1.1 Baseline blood eosinophils &lt;400 cells/μL</b></td> </tr> <tr> <td>Corren 2016</td><td>-0.122</td><td>0.1071</td><td>316</td><td>76</td><td>100.0%</td><td>-0.12 [-0.33, 0.09]</td> </tr> <tr> <td><b>Subtotal (95% CI)</b></td><td></td><td></td><td><b>316</b></td><td><b>76</b></td><td><b>100.0%</b></td><td><b>-0.12 [-0.33, 0.09]</b></td> </tr> <tr> <td colspan="7">Heterogeneity: Not applicable<br/>Test for overall effect: Z = 1.14 (P = 0.25)</td> </tr> <tr> <td colspan="7"><b>7.1.2 Baseline blood eosinophils ≥400 cells/μL</b></td> </tr> <tr> <td>Bjerner 2016</td><td>-0.359</td><td>0.1112</td><td>101</td><td>103</td><td>14.7%</td><td>-0.36 [-0.58, -0.14]</td> </tr> <tr> <td>Castro 2015a</td><td>-0.26</td><td>0.0663</td><td>245</td><td>244</td><td>41.4%</td><td>-0.26 [-0.39, -0.13]</td> </tr> <tr> <td>Castro 2015b</td><td>-0.24</td><td>0.0663</td><td>232</td><td>232</td><td>41.4%</td><td>-0.24 [-0.37, -0.11]</td> </tr> <tr> <td>Corren 2016</td><td>-0.49</td><td>0.2653</td><td>77</td><td>19</td><td>2.6%</td><td>-0.49 [-1.01, 0.03]</td> </tr> <tr> <td><b>Subtotal (95% CI)</b></td><td></td><td></td><td><b>655</b></td><td><b>598</b></td><td><b>100.0%</b></td><td><b>-0.27 [-0.36, -0.19]</b></td> </tr> <tr> <td colspan="7">Heterogeneity: Tau<sup>2</sup> = 0.00; Chi<sup>2</sup> = 1.55, df = 3 (P = 0.67); I<sup>2</sup> = 0%<br/>Test for overall effect: Z = 6.38 (P &lt; 0.00001)</td> </tr> <tr> <td colspan="7">Test for subgroup differences: Chi<sup>2</sup> = 1.70, df = 1 (P = 0.19), I<sup>2</sup> = 41.1%</td> </tr> </tbody> </table> |                  |               | Study or Subgroup | Mean Difference                    | SE | Reslizumab Total | Placebo Total | Weight | Mean Difference IV, Random, 95% CI | <b>7.1.1 Baseline blood eosinophils &lt;400 cells/μL</b> |  |  |  |  |  |  | Corren 2016 | -0.122 | 0.1071 | 316 | 76 | 100.0% | -0.12 [-0.33, 0.09] | <b>Subtotal (95% CI)</b> |  |  | <b>316</b> | <b>76</b> | <b>100.0%</b> | <b>-0.12 [-0.33, 0.09]</b> | Heterogeneity: Not applicable<br>Test for overall effect: Z = 1.14 (P = 0.25) |  |  |  |  |  |  | <b>7.1.2 Baseline blood eosinophils ≥400 cells/μL</b> |  |  |  |  |  |  | Bjerner 2016 | -0.359 | 0.1112 | 101 | 103 | 14.7% | -0.36 [-0.58, -0.14] | Castro 2015a             | -0.26 | 0.0663 | 245       | 244       | 41.4%        | -0.26 [-0.39, -0.13]       | Castro 2015b                                                                  | -0.24 | 0.0663 | 232 | 232 | 41.4% | -0.24 [-0.37, -0.11] | Corren 2016           | -0.49 | 0.2653 | 77        | 19        | 2.6%          | -0.49 [-1.01, 0.03]        | <b>Subtotal (95% CI)</b>                                                                                                                                                                                                             |  |  | <b>655</b> | <b>598</b> | <b>100.0%</b> | <b>-0.27 [-0.36, -0.19]</b> | Heterogeneity: Tau <sup>2</sup> = 0.00; Chi <sup>2</sup> = 1.55, df = 3 (P = 0.67); I <sup>2</sup> = 0%<br>Test for overall effect: Z = 6.38 (P < 0.00001) |                                                                                                                                                                                                                                                                         |  |  |  |  |  | Test for subgroup differences: Chi <sup>2</sup> = 1.70, df = 1 (P = 0.19), I <sup>2</sup> = 41.1% |  |  |  |  |  |  | <p>⊕⊕⊕○<br/>MODERATE<br/>a</p> | <p>There are significant improvements in asthma control assessed by the ACQ-7 with reslizumab compared to placebo in patients with baseline blood eosinophil counts ≥400/μL but not &lt;400/μL. However there are no statistically significant differences between subgroups.</p> |
| Study or Subgroup                                                                                                                                                                                                                                                                                                                                                                                                                               | Mean Difference                                                                                                                                                                                                                                                                                                     | SE                                                                                                                                                                                                                                                                                                                                                                                                                                                                                                                                                                                                                                                                                                                                                                                                                                                                                                                                                                                                                                                                                                                                                                                                                                                                                                                                                                                                                                                                                                                                                                                                                                                                                                                                                                                                                                                                   | Reslizumab Total | Placebo Total | Weight            | Mean Difference IV, Random, 95% CI |    |                  |               |        |                                    |                                                          |  |  |  |  |  |  |             |        |        |     |    |        |                     |                          |  |  |            |           |               |                            |                                                                               |  |  |  |  |  |  |                                                       |  |  |  |  |  |  |              |        |        |     |     |       |                      |                          |       |        |           |           |              |                            |                                                                               |       |        |     |     |       |                      |                       |       |        |           |           |               |                            |                                                                                                                                                                                                                                      |  |  |            |            |               |                             |                                                                                                                                                            |                                                                                                                                                                                                                                                                         |  |  |  |  |  |                                                                                                   |  |  |  |  |  |  |                                |                                                                                                                                                                                                                                                                                   |
| <b>7.1.1 Baseline blood eosinophils &lt;400 cells/μL</b>                                                                                                                                                                                                                                                                                                                                                                                        |                                                                                                                                                                                                                                                                                                                     |                                                                                                                                                                                                                                                                                                                                                                                                                                                                                                                                                                                                                                                                                                                                                                                                                                                                                                                                                                                                                                                                                                                                                                                                                                                                                                                                                                                                                                                                                                                                                                                                                                                                                                                                                                                                                                                                      |                  |               |                   |                                    |    |                  |               |        |                                    |                                                          |  |  |  |  |  |  |             |        |        |     |    |        |                     |                          |  |  |            |           |               |                            |                                                                               |  |  |  |  |  |  |                                                       |  |  |  |  |  |  |              |        |        |     |     |       |                      |                          |       |        |           |           |              |                            |                                                                               |       |        |     |     |       |                      |                       |       |        |           |           |               |                            |                                                                                                                                                                                                                                      |  |  |            |            |               |                             |                                                                                                                                                            |                                                                                                                                                                                                                                                                         |  |  |  |  |  |                                                                                                   |  |  |  |  |  |  |                                |                                                                                                                                                                                                                                                                                   |
| Corren 2016                                                                                                                                                                                                                                                                                                                                                                                                                                     | -0.122                                                                                                                                                                                                                                                                                                              | 0.1071                                                                                                                                                                                                                                                                                                                                                                                                                                                                                                                                                                                                                                                                                                                                                                                                                                                                                                                                                                                                                                                                                                                                                                                                                                                                                                                                                                                                                                                                                                                                                                                                                                                                                                                                                                                                                                                               | 316              | 76            | 100.0%            | -0.12 [-0.33, 0.09]                |    |                  |               |        |                                    |                                                          |  |  |  |  |  |  |             |        |        |     |    |        |                     |                          |  |  |            |           |               |                            |                                                                               |  |  |  |  |  |  |                                                       |  |  |  |  |  |  |              |        |        |     |     |       |                      |                          |       |        |           |           |              |                            |                                                                               |       |        |     |     |       |                      |                       |       |        |           |           |               |                            |                                                                                                                                                                                                                                      |  |  |            |            |               |                             |                                                                                                                                                            |                                                                                                                                                                                                                                                                         |  |  |  |  |  |                                                                                                   |  |  |  |  |  |  |                                |                                                                                                                                                                                                                                                                                   |
| <b>Subtotal (95% CI)</b>                                                                                                                                                                                                                                                                                                                                                                                                                        |                                                                                                                                                                                                                                                                                                                     |                                                                                                                                                                                                                                                                                                                                                                                                                                                                                                                                                                                                                                                                                                                                                                                                                                                                                                                                                                                                                                                                                                                                                                                                                                                                                                                                                                                                                                                                                                                                                                                                                                                                                                                                                                                                                                                                      | <b>316</b>       | <b>76</b>     | <b>100.0%</b>     | <b>-0.12 [-0.33, 0.09]</b>         |    |                  |               |        |                                    |                                                          |  |  |  |  |  |  |             |        |        |     |    |        |                     |                          |  |  |            |           |               |                            |                                                                               |  |  |  |  |  |  |                                                       |  |  |  |  |  |  |              |        |        |     |     |       |                      |                          |       |        |           |           |              |                            |                                                                               |       |        |     |     |       |                      |                       |       |        |           |           |               |                            |                                                                                                                                                                                                                                      |  |  |            |            |               |                             |                                                                                                                                                            |                                                                                                                                                                                                                                                                         |  |  |  |  |  |                                                                                                   |  |  |  |  |  |  |                                |                                                                                                                                                                                                                                                                                   |
| Heterogeneity: Not applicable<br>Test for overall effect: Z = 1.14 (P = 0.25)                                                                                                                                                                                                                                                                                                                                                                   |                                                                                                                                                                                                                                                                                                                     |                                                                                                                                                                                                                                                                                                                                                                                                                                                                                                                                                                                                                                                                                                                                                                                                                                                                                                                                                                                                                                                                                                                                                                                                                                                                                                                                                                                                                                                                                                                                                                                                                                                                                                                                                                                                                                                                      |                  |               |                   |                                    |    |                  |               |        |                                    |                                                          |  |  |  |  |  |  |             |        |        |     |    |        |                     |                          |  |  |            |           |               |                            |                                                                               |  |  |  |  |  |  |                                                       |  |  |  |  |  |  |              |        |        |     |     |       |                      |                          |       |        |           |           |              |                            |                                                                               |       |        |     |     |       |                      |                       |       |        |           |           |               |                            |                                                                                                                                                                                                                                      |  |  |            |            |               |                             |                                                                                                                                                            |                                                                                                                                                                                                                                                                         |  |  |  |  |  |                                                                                                   |  |  |  |  |  |  |                                |                                                                                                                                                                                                                                                                                   |
| <b>7.1.2 Baseline blood eosinophils ≥400 cells/μL</b>                                                                                                                                                                                                                                                                                                                                                                                           |                                                                                                                                                                                                                                                                                                                     |                                                                                                                                                                                                                                                                                                                                                                                                                                                                                                                                                                                                                                                                                                                                                                                                                                                                                                                                                                                                                                                                                                                                                                                                                                                                                                                                                                                                                                                                                                                                                                                                                                                                                                                                                                                                                                                                      |                  |               |                   |                                    |    |                  |               |        |                                    |                                                          |  |  |  |  |  |  |             |        |        |     |    |        |                     |                          |  |  |            |           |               |                            |                                                                               |  |  |  |  |  |  |                                                       |  |  |  |  |  |  |              |        |        |     |     |       |                      |                          |       |        |           |           |              |                            |                                                                               |       |        |     |     |       |                      |                       |       |        |           |           |               |                            |                                                                                                                                                                                                                                      |  |  |            |            |               |                             |                                                                                                                                                            |                                                                                                                                                                                                                                                                         |  |  |  |  |  |                                                                                                   |  |  |  |  |  |  |                                |                                                                                                                                                                                                                                                                                   |
| Bjerner 2016                                                                                                                                                                                                                                                                                                                                                                                                                                    | -0.359                                                                                                                                                                                                                                                                                                              | 0.1112                                                                                                                                                                                                                                                                                                                                                                                                                                                                                                                                                                                                                                                                                                                                                                                                                                                                                                                                                                                                                                                                                                                                                                                                                                                                                                                                                                                                                                                                                                                                                                                                                                                                                                                                                                                                                                                               | 101              | 103           | 14.7%             | -0.36 [-0.58, -0.14]               |    |                  |               |        |                                    |                                                          |  |  |  |  |  |  |             |        |        |     |    |        |                     |                          |  |  |            |           |               |                            |                                                                               |  |  |  |  |  |  |                                                       |  |  |  |  |  |  |              |        |        |     |     |       |                      |                          |       |        |           |           |              |                            |                                                                               |       |        |     |     |       |                      |                       |       |        |           |           |               |                            |                                                                                                                                                                                                                                      |  |  |            |            |               |                             |                                                                                                                                                            |                                                                                                                                                                                                                                                                         |  |  |  |  |  |                                                                                                   |  |  |  |  |  |  |                                |                                                                                                                                                                                                                                                                                   |
| Castro 2015a                                                                                                                                                                                                                                                                                                                                                                                                                                    | -0.26                                                                                                                                                                                                                                                                                                               | 0.0663                                                                                                                                                                                                                                                                                                                                                                                                                                                                                                                                                                                                                                                                                                                                                                                                                                                                                                                                                                                                                                                                                                                                                                                                                                                                                                                                                                                                                                                                                                                                                                                                                                                                                                                                                                                                                                                               | 245              | 244           | 41.4%             | -0.26 [-0.39, -0.13]               |    |                  |               |        |                                    |                                                          |  |  |  |  |  |  |             |        |        |     |    |        |                     |                          |  |  |            |           |               |                            |                                                                               |  |  |  |  |  |  |                                                       |  |  |  |  |  |  |              |        |        |     |     |       |                      |                          |       |        |           |           |              |                            |                                                                               |       |        |     |     |       |                      |                       |       |        |           |           |               |                            |                                                                                                                                                                                                                                      |  |  |            |            |               |                             |                                                                                                                                                            |                                                                                                                                                                                                                                                                         |  |  |  |  |  |                                                                                                   |  |  |  |  |  |  |                                |                                                                                                                                                                                                                                                                                   |
| Castro 2015b                                                                                                                                                                                                                                                                                                                                                                                                                                    | -0.24                                                                                                                                                                                                                                                                                                               | 0.0663                                                                                                                                                                                                                                                                                                                                                                                                                                                                                                                                                                                                                                                                                                                                                                                                                                                                                                                                                                                                                                                                                                                                                                                                                                                                                                                                                                                                                                                                                                                                                                                                                                                                                                                                                                                                                                                               | 232              | 232           | 41.4%             | -0.24 [-0.37, -0.11]               |    |                  |               |        |                                    |                                                          |  |  |  |  |  |  |             |        |        |     |    |        |                     |                          |  |  |            |           |               |                            |                                                                               |  |  |  |  |  |  |                                                       |  |  |  |  |  |  |              |        |        |     |     |       |                      |                          |       |        |           |           |              |                            |                                                                               |       |        |     |     |       |                      |                       |       |        |           |           |               |                            |                                                                                                                                                                                                                                      |  |  |            |            |               |                             |                                                                                                                                                            |                                                                                                                                                                                                                                                                         |  |  |  |  |  |                                                                                                   |  |  |  |  |  |  |                                |                                                                                                                                                                                                                                                                                   |
| Corren 2016                                                                                                                                                                                                                                                                                                                                                                                                                                     | -0.49                                                                                                                                                                                                                                                                                                               | 0.2653                                                                                                                                                                                                                                                                                                                                                                                                                                                                                                                                                                                                                                                                                                                                                                                                                                                                                                                                                                                                                                                                                                                                                                                                                                                                                                                                                                                                                                                                                                                                                                                                                                                                                                                                                                                                                                                               | 77               | 19            | 2.6%              | -0.49 [-1.01, 0.03]                |    |                  |               |        |                                    |                                                          |  |  |  |  |  |  |             |        |        |     |    |        |                     |                          |  |  |            |           |               |                            |                                                                               |  |  |  |  |  |  |                                                       |  |  |  |  |  |  |              |        |        |     |     |       |                      |                          |       |        |           |           |              |                            |                                                                               |       |        |     |     |       |                      |                       |       |        |           |           |               |                            |                                                                                                                                                                                                                                      |  |  |            |            |               |                             |                                                                                                                                                            |                                                                                                                                                                                                                                                                         |  |  |  |  |  |                                                                                                   |  |  |  |  |  |  |                                |                                                                                                                                                                                                                                                                                   |
| <b>Subtotal (95% CI)</b>                                                                                                                                                                                                                                                                                                                                                                                                                        |                                                                                                                                                                                                                                                                                                                     |                                                                                                                                                                                                                                                                                                                                                                                                                                                                                                                                                                                                                                                                                                                                                                                                                                                                                                                                                                                                                                                                                                                                                                                                                                                                                                                                                                                                                                                                                                                                                                                                                                                                                                                                                                                                                                                                      | <b>655</b>       | <b>598</b>    | <b>100.0%</b>     | <b>-0.27 [-0.36, -0.19]</b>        |    |                  |               |        |                                    |                                                          |  |  |  |  |  |  |             |        |        |     |    |        |                     |                          |  |  |            |           |               |                            |                                                                               |  |  |  |  |  |  |                                                       |  |  |  |  |  |  |              |        |        |     |     |       |                      |                          |       |        |           |           |              |                            |                                                                               |       |        |     |     |       |                      |                       |       |        |           |           |               |                            |                                                                                                                                                                                                                                      |  |  |            |            |               |                             |                                                                                                                                                            |                                                                                                                                                                                                                                                                         |  |  |  |  |  |                                                                                                   |  |  |  |  |  |  |                                |                                                                                                                                                                                                                                                                                   |
| Heterogeneity: Tau <sup>2</sup> = 0.00; Chi <sup>2</sup> = 1.55, df = 3 (P = 0.67); I <sup>2</sup> = 0%<br>Test for overall effect: Z = 6.38 (P < 0.00001)                                                                                                                                                                                                                                                                                      |                                                                                                                                                                                                                                                                                                                     |                                                                                                                                                                                                                                                                                                                                                                                                                                                                                                                                                                                                                                                                                                                                                                                                                                                                                                                                                                                                                                                                                                                                                                                                                                                                                                                                                                                                                                                                                                                                                                                                                                                                                                                                                                                                                                                                      |                  |               |                   |                                    |    |                  |               |        |                                    |                                                          |  |  |  |  |  |  |             |        |        |     |    |        |                     |                          |  |  |            |           |               |                            |                                                                               |  |  |  |  |  |  |                                                       |  |  |  |  |  |  |              |        |        |     |     |       |                      |                          |       |        |           |           |              |                            |                                                                               |       |        |     |     |       |                      |                       |       |        |           |           |               |                            |                                                                                                                                                                                                                                      |  |  |            |            |               |                             |                                                                                                                                                            |                                                                                                                                                                                                                                                                         |  |  |  |  |  |                                                                                                   |  |  |  |  |  |  |                                |                                                                                                                                                                                                                                                                                   |
| Test for subgroup differences: Chi <sup>2</sup> = 1.70, df = 1 (P = 0.19), I <sup>2</sup> = 41.1%                                                                                                                                                                                                                                                                                                                                               |                                                                                                                                                                                                                                                                                                                     |                                                                                                                                                                                                                                                                                                                                                                                                                                                                                                                                                                                                                                                                                                                                                                                                                                                                                                                                                                                                                                                                                                                                                                                                                                                                                                                                                                                                                                                                                                                                                                                                                                                                                                                                                                                                                                                                      |                  |               |                   |                                    |    |                  |               |        |                                    |                                                          |  |  |  |  |  |  |             |        |        |     |    |        |                     |                          |  |  |            |           |               |                            |                                                                               |  |  |  |  |  |  |                                                       |  |  |  |  |  |  |              |        |        |     |     |       |                      |                          |       |        |           |           |              |                            |                                                                               |       |        |     |     |       |                      |                       |       |        |           |           |               |                            |                                                                                                                                                                                                                                      |  |  |            |            |               |                             |                                                                                                                                                            |                                                                                                                                                                                                                                                                         |  |  |  |  |  |                                                                                                   |  |  |  |  |  |  |                                |                                                                                                                                                                                                                                                                                   |
| <p><b>Asthma control (change from baseline)</b><br/>assessed with: Asthma Control Questionnaire (ACQ-7); Scale from: 0 to 6; lower values indicate better asthma control; MCID 0.5<br/>follow up: 15 weeks<br/>№ of participants: 106<br/>(1 RCT) <sup>4</sup></p> <p><u>Study participants meet criteria for the diagnosis of severe asthma defined by the ERS/ATS Guidelines on Severe Asthma<sup>5</sup></u></p> <p>Importance: CRITICAL</p> | <p>Mean change from baseline in ACQ-7 score in patients treated with reslizumab compared to placebo were: Eosinophil &lt;500/μL: Mean difference (95% CI) = -0.06 (-0.55 to 0.43), n=51; Eosinophil ≥500/μL: Mean difference (95% CI) = -0.57 (-1.19 to 0.05), n=55. Test for subgroup differences, p=0.21.</p>     | <table border="1"> <thead> <tr> <th>Study or Subgroup</th><th>Mean Difference</th><th>SE</th><th>Reslizumab Total</th><th>Placebo Total</th><th>Weight</th><th>Mean Difference IV, Fixed, 95% CI</th></tr> </thead> <tbody> <tr> <td colspan="7"><b>7.2.1 Baseline blood eosinophils &lt;500 cells/μL</b></td> </tr> <tr> <td>Castro 2011</td><td>-0.06</td><td>0.25</td><td>25</td><td>26</td><td>61.5%</td><td>-0.06 [-0.55, 0.43]</td> </tr> <tr> <td><b>Subtotal (95% CI)</b></td><td></td><td></td><td><b>25</b></td><td><b>26</b></td><td><b>61.5%</b></td><td><b>-0.06 [-0.55, 0.43]</b></td> </tr> <tr> <td colspan="7">Heterogeneity: Not applicable<br/>Test for overall effect: Z = 0.24 (P = 0.81)</td> </tr> <tr> <td colspan="7"><b>7.2.2 Baseline blood eosinophils ≥500 cells/μL</b></td> </tr> <tr> <td>Castro 2011</td><td>-0.57</td><td>0.3163</td><td>28</td><td>27</td><td>38.5%</td><td>-0.57 [-1.19, 0.05]</td> </tr> <tr> <td><b>Subtotal (95% CI)</b></td><td></td><td></td><td><b>28</b></td><td><b>27</b></td><td><b>38.5%</b></td><td><b>-0.57 [-1.19, 0.05]</b></td> </tr> <tr> <td colspan="7">Heterogeneity: Not applicable<br/>Test for overall effect: Z = 1.80 (P = 0.07)</td> </tr> <tr> <td><b>Total (95% CI)</b></td><td></td><td></td><td><b>53</b></td><td><b>53</b></td><td><b>100.0%</b></td><td><b>-0.26 [-0.64, 0.13]</b></td> </tr> <tr> <td colspan="7">Heterogeneity: Chi<sup>2</sup> = 1.60, df = 1 (P = 0.21); I<sup>2</sup> = 38%<br/>Test for overall effect: Z = 1.31 (P = 0.19)<br/>Test for subgroup differences: Chi<sup>2</sup> = 1.60, df = 1 (P = 0.21), I<sup>2</sup> = 37.5%</td> </tr> </tbody> </table>                                                                                                                                                                                                 |                  |               | Study or Subgroup | Mean Difference                    | SE | Reslizumab Total | Placebo Total | Weight | Mean Difference IV, Fixed, 95% CI  | <b>7.2.1 Baseline blood eosinophils &lt;500 cells/μL</b> |  |  |  |  |  |  | Castro 2011 | -0.06  | 0.25   | 25  | 26 | 61.5%  | -0.06 [-0.55, 0.43] | <b>Subtotal (95% CI)</b> |  |  | <b>25</b>  | <b>26</b> | <b>61.5%</b>  | <b>-0.06 [-0.55, 0.43]</b> | Heterogeneity: Not applicable<br>Test for overall effect: Z = 0.24 (P = 0.81) |  |  |  |  |  |  | <b>7.2.2 Baseline blood eosinophils ≥500 cells/μL</b> |  |  |  |  |  |  | Castro 2011  | -0.57  | 0.3163 | 28  | 27  | 38.5% | -0.57 [-1.19, 0.05]  | <b>Subtotal (95% CI)</b> |       |        | <b>28</b> | <b>27</b> | <b>38.5%</b> | <b>-0.57 [-1.19, 0.05]</b> | Heterogeneity: Not applicable<br>Test for overall effect: Z = 1.80 (P = 0.07) |       |        |     |     |       |                      | <b>Total (95% CI)</b> |       |        | <b>53</b> | <b>53</b> | <b>100.0%</b> | <b>-0.26 [-0.64, 0.13]</b> | Heterogeneity: Chi <sup>2</sup> = 1.60, df = 1 (P = 0.21); I <sup>2</sup> = 38%<br>Test for overall effect: Z = 1.31 (P = 0.19)<br>Test for subgroup differences: Chi <sup>2</sup> = 1.60, df = 1 (P = 0.21), I <sup>2</sup> = 37.5% |  |  |            |            |               |                             | <p>⊕○○○<br/>VERY LOW<br/>b,c</p>                                                                                                                           | <p>There are no significant improvements in asthma control assessed by the ACQ-7 with reslizumab compared to placebo in patients with baseline blood eosinophil counts &lt;500/μL or ≥500/μL. There are no statistically significant differences between subgroups.</p> |  |  |  |  |  |                                                                                                   |  |  |  |  |  |  |                                |                                                                                                                                                                                                                                                                                   |
| Study or Subgroup                                                                                                                                                                                                                                                                                                                                                                                                                               | Mean Difference                                                                                                                                                                                                                                                                                                     | SE                                                                                                                                                                                                                                                                                                                                                                                                                                                                                                                                                                                                                                                                                                                                                                                                                                                                                                                                                                                                                                                                                                                                                                                                                                                                                                                                                                                                                                                                                                                                                                                                                                                                                                                                                                                                                                                                   | Reslizumab Total | Placebo Total | Weight            | Mean Difference IV, Fixed, 95% CI  |    |                  |               |        |                                    |                                                          |  |  |  |  |  |  |             |        |        |     |    |        |                     |                          |  |  |            |           |               |                            |                                                                               |  |  |  |  |  |  |                                                       |  |  |  |  |  |  |              |        |        |     |     |       |                      |                          |       |        |           |           |              |                            |                                                                               |       |        |     |     |       |                      |                       |       |        |           |           |               |                            |                                                                                                                                                                                                                                      |  |  |            |            |               |                             |                                                                                                                                                            |                                                                                                                                                                                                                                                                         |  |  |  |  |  |                                                                                                   |  |  |  |  |  |  |                                |                                                                                                                                                                                                                                                                                   |
| <b>7.2.1 Baseline blood eosinophils &lt;500 cells/μL</b>                                                                                                                                                                                                                                                                                                                                                                                        |                                                                                                                                                                                                                                                                                                                     |                                                                                                                                                                                                                                                                                                                                                                                                                                                                                                                                                                                                                                                                                                                                                                                                                                                                                                                                                                                                                                                                                                                                                                                                                                                                                                                                                                                                                                                                                                                                                                                                                                                                                                                                                                                                                                                                      |                  |               |                   |                                    |    |                  |               |        |                                    |                                                          |  |  |  |  |  |  |             |        |        |     |    |        |                     |                          |  |  |            |           |               |                            |                                                                               |  |  |  |  |  |  |                                                       |  |  |  |  |  |  |              |        |        |     |     |       |                      |                          |       |        |           |           |              |                            |                                                                               |       |        |     |     |       |                      |                       |       |        |           |           |               |                            |                                                                                                                                                                                                                                      |  |  |            |            |               |                             |                                                                                                                                                            |                                                                                                                                                                                                                                                                         |  |  |  |  |  |                                                                                                   |  |  |  |  |  |  |                                |                                                                                                                                                                                                                                                                                   |
| Castro 2011                                                                                                                                                                                                                                                                                                                                                                                                                                     | -0.06                                                                                                                                                                                                                                                                                                               | 0.25                                                                                                                                                                                                                                                                                                                                                                                                                                                                                                                                                                                                                                                                                                                                                                                                                                                                                                                                                                                                                                                                                                                                                                                                                                                                                                                                                                                                                                                                                                                                                                                                                                                                                                                                                                                                                                                                 | 25               | 26            | 61.5%             | -0.06 [-0.55, 0.43]                |    |                  |               |        |                                    |                                                          |  |  |  |  |  |  |             |        |        |     |    |        |                     |                          |  |  |            |           |               |                            |                                                                               |  |  |  |  |  |  |                                                       |  |  |  |  |  |  |              |        |        |     |     |       |                      |                          |       |        |           |           |              |                            |                                                                               |       |        |     |     |       |                      |                       |       |        |           |           |               |                            |                                                                                                                                                                                                                                      |  |  |            |            |               |                             |                                                                                                                                                            |                                                                                                                                                                                                                                                                         |  |  |  |  |  |                                                                                                   |  |  |  |  |  |  |                                |                                                                                                                                                                                                                                                                                   |
| <b>Subtotal (95% CI)</b>                                                                                                                                                                                                                                                                                                                                                                                                                        |                                                                                                                                                                                                                                                                                                                     |                                                                                                                                                                                                                                                                                                                                                                                                                                                                                                                                                                                                                                                                                                                                                                                                                                                                                                                                                                                                                                                                                                                                                                                                                                                                                                                                                                                                                                                                                                                                                                                                                                                                                                                                                                                                                                                                      | <b>25</b>        | <b>26</b>     | <b>61.5%</b>      | <b>-0.06 [-0.55, 0.43]</b>         |    |                  |               |        |                                    |                                                          |  |  |  |  |  |  |             |        |        |     |    |        |                     |                          |  |  |            |           |               |                            |                                                                               |  |  |  |  |  |  |                                                       |  |  |  |  |  |  |              |        |        |     |     |       |                      |                          |       |        |           |           |              |                            |                                                                               |       |        |     |     |       |                      |                       |       |        |           |           |               |                            |                                                                                                                                                                                                                                      |  |  |            |            |               |                             |                                                                                                                                                            |                                                                                                                                                                                                                                                                         |  |  |  |  |  |                                                                                                   |  |  |  |  |  |  |                                |                                                                                                                                                                                                                                                                                   |
| Heterogeneity: Not applicable<br>Test for overall effect: Z = 0.24 (P = 0.81)                                                                                                                                                                                                                                                                                                                                                                   |                                                                                                                                                                                                                                                                                                                     |                                                                                                                                                                                                                                                                                                                                                                                                                                                                                                                                                                                                                                                                                                                                                                                                                                                                                                                                                                                                                                                                                                                                                                                                                                                                                                                                                                                                                                                                                                                                                                                                                                                                                                                                                                                                                                                                      |                  |               |                   |                                    |    |                  |               |        |                                    |                                                          |  |  |  |  |  |  |             |        |        |     |    |        |                     |                          |  |  |            |           |               |                            |                                                                               |  |  |  |  |  |  |                                                       |  |  |  |  |  |  |              |        |        |     |     |       |                      |                          |       |        |           |           |              |                            |                                                                               |       |        |     |     |       |                      |                       |       |        |           |           |               |                            |                                                                                                                                                                                                                                      |  |  |            |            |               |                             |                                                                                                                                                            |                                                                                                                                                                                                                                                                         |  |  |  |  |  |                                                                                                   |  |  |  |  |  |  |                                |                                                                                                                                                                                                                                                                                   |
| <b>7.2.2 Baseline blood eosinophils ≥500 cells/μL</b>                                                                                                                                                                                                                                                                                                                                                                                           |                                                                                                                                                                                                                                                                                                                     |                                                                                                                                                                                                                                                                                                                                                                                                                                                                                                                                                                                                                                                                                                                                                                                                                                                                                                                                                                                                                                                                                                                                                                                                                                                                                                                                                                                                                                                                                                                                                                                                                                                                                                                                                                                                                                                                      |                  |               |                   |                                    |    |                  |               |        |                                    |                                                          |  |  |  |  |  |  |             |        |        |     |    |        |                     |                          |  |  |            |           |               |                            |                                                                               |  |  |  |  |  |  |                                                       |  |  |  |  |  |  |              |        |        |     |     |       |                      |                          |       |        |           |           |              |                            |                                                                               |       |        |     |     |       |                      |                       |       |        |           |           |               |                            |                                                                                                                                                                                                                                      |  |  |            |            |               |                             |                                                                                                                                                            |                                                                                                                                                                                                                                                                         |  |  |  |  |  |                                                                                                   |  |  |  |  |  |  |                                |                                                                                                                                                                                                                                                                                   |
| Castro 2011                                                                                                                                                                                                                                                                                                                                                                                                                                     | -0.57                                                                                                                                                                                                                                                                                                               | 0.3163                                                                                                                                                                                                                                                                                                                                                                                                                                                                                                                                                                                                                                                                                                                                                                                                                                                                                                                                                                                                                                                                                                                                                                                                                                                                                                                                                                                                                                                                                                                                                                                                                                                                                                                                                                                                                                                               | 28               | 27            | 38.5%             | -0.57 [-1.19, 0.05]                |    |                  |               |        |                                    |                                                          |  |  |  |  |  |  |             |        |        |     |    |        |                     |                          |  |  |            |           |               |                            |                                                                               |  |  |  |  |  |  |                                                       |  |  |  |  |  |  |              |        |        |     |     |       |                      |                          |       |        |           |           |              |                            |                                                                               |       |        |     |     |       |                      |                       |       |        |           |           |               |                            |                                                                                                                                                                                                                                      |  |  |            |            |               |                             |                                                                                                                                                            |                                                                                                                                                                                                                                                                         |  |  |  |  |  |                                                                                                   |  |  |  |  |  |  |                                |                                                                                                                                                                                                                                                                                   |
| <b>Subtotal (95% CI)</b>                                                                                                                                                                                                                                                                                                                                                                                                                        |                                                                                                                                                                                                                                                                                                                     |                                                                                                                                                                                                                                                                                                                                                                                                                                                                                                                                                                                                                                                                                                                                                                                                                                                                                                                                                                                                                                                                                                                                                                                                                                                                                                                                                                                                                                                                                                                                                                                                                                                                                                                                                                                                                                                                      | <b>28</b>        | <b>27</b>     | <b>38.5%</b>      | <b>-0.57 [-1.19, 0.05]</b>         |    |                  |               |        |                                    |                                                          |  |  |  |  |  |  |             |        |        |     |    |        |                     |                          |  |  |            |           |               |                            |                                                                               |  |  |  |  |  |  |                                                       |  |  |  |  |  |  |              |        |        |     |     |       |                      |                          |       |        |           |           |              |                            |                                                                               |       |        |     |     |       |                      |                       |       |        |           |           |               |                            |                                                                                                                                                                                                                                      |  |  |            |            |               |                             |                                                                                                                                                            |                                                                                                                                                                                                                                                                         |  |  |  |  |  |                                                                                                   |  |  |  |  |  |  |                                |                                                                                                                                                                                                                                                                                   |
| Heterogeneity: Not applicable<br>Test for overall effect: Z = 1.80 (P = 0.07)                                                                                                                                                                                                                                                                                                                                                                   |                                                                                                                                                                                                                                                                                                                     |                                                                                                                                                                                                                                                                                                                                                                                                                                                                                                                                                                                                                                                                                                                                                                                                                                                                                                                                                                                                                                                                                                                                                                                                                                                                                                                                                                                                                                                                                                                                                                                                                                                                                                                                                                                                                                                                      |                  |               |                   |                                    |    |                  |               |        |                                    |                                                          |  |  |  |  |  |  |             |        |        |     |    |        |                     |                          |  |  |            |           |               |                            |                                                                               |  |  |  |  |  |  |                                                       |  |  |  |  |  |  |              |        |        |     |     |       |                      |                          |       |        |           |           |              |                            |                                                                               |       |        |     |     |       |                      |                       |       |        |           |           |               |                            |                                                                                                                                                                                                                                      |  |  |            |            |               |                             |                                                                                                                                                            |                                                                                                                                                                                                                                                                         |  |  |  |  |  |                                                                                                   |  |  |  |  |  |  |                                |                                                                                                                                                                                                                                                                                   |
| <b>Total (95% CI)</b>                                                                                                                                                                                                                                                                                                                                                                                                                           |                                                                                                                                                                                                                                                                                                                     |                                                                                                                                                                                                                                                                                                                                                                                                                                                                                                                                                                                                                                                                                                                                                                                                                                                                                                                                                                                                                                                                                                                                                                                                                                                                                                                                                                                                                                                                                                                                                                                                                                                                                                                                                                                                                                                                      | <b>53</b>        | <b>53</b>     | <b>100.0%</b>     | <b>-0.26 [-0.64, 0.13]</b>         |    |                  |               |        |                                    |                                                          |  |  |  |  |  |  |             |        |        |     |    |        |                     |                          |  |  |            |           |               |                            |                                                                               |  |  |  |  |  |  |                                                       |  |  |  |  |  |  |              |        |        |     |     |       |                      |                          |       |        |           |           |              |                            |                                                                               |       |        |     |     |       |                      |                       |       |        |           |           |               |                            |                                                                                                                                                                                                                                      |  |  |            |            |               |                             |                                                                                                                                                            |                                                                                                                                                                                                                                                                         |  |  |  |  |  |                                                                                                   |  |  |  |  |  |  |                                |                                                                                                                                                                                                                                                                                   |
| Heterogeneity: Chi <sup>2</sup> = 1.60, df = 1 (P = 0.21); I <sup>2</sup> = 38%<br>Test for overall effect: Z = 1.31 (P = 0.19)<br>Test for subgroup differences: Chi <sup>2</sup> = 1.60, df = 1 (P = 0.21), I <sup>2</sup> = 37.5%                                                                                                                                                                                                            |                                                                                                                                                                                                                                                                                                                     |                                                                                                                                                                                                                                                                                                                                                                                                                                                                                                                                                                                                                                                                                                                                                                                                                                                                                                                                                                                                                                                                                                                                                                                                                                                                                                                                                                                                                                                                                                                                                                                                                                                                                                                                                                                                                                                                      |                  |               |                   |                                    |    |                  |               |        |                                    |                                                          |  |  |  |  |  |  |             |        |        |     |    |        |                     |                          |  |  |            |           |               |                            |                                                                               |  |  |  |  |  |  |                                                       |  |  |  |  |  |  |              |        |        |     |     |       |                      |                          |       |        |           |           |              |                            |                                                                               |       |        |     |     |       |                      |                       |       |        |           |           |               |                            |                                                                                                                                                                                                                                      |  |  |            |            |               |                             |                                                                                                                                                            |                                                                                                                                                                                                                                                                         |  |  |  |  |  |                                                                                                   |  |  |  |  |  |  |                                |                                                                                                                                                                                                                                                                                   |

| Outcome<br>№ of participants<br>(studies)                                                                                                                                                                                                                                                                                                | Relative effect<br>(95% CI)                                                                                                                                                                                                                                                                                                        | Anticipated absolute effects (95% CI)                                                                                                                                                                                                                                                                                                                                                                                                                                                                                                                                                                                                                                                                                                                                                                                                                                                                                                                                                                                                                                                                                                                                                                                                                                                                                                                                                                                                                                                                                                                                                                                                                                                                                                                                                                                                                                                                                                                                            |                  |               | Certainty         | What happens                       |    |                  |               |        |                                    |                                                          |  |  |  |  |  |  |             |       |        |     |    |        |                    |                          |  |  |            |           |               |                           |                                                                               |  |  |  |  |  |  |                                                       |  |  |  |  |  |  |             |      |        |     |     |        |                   |                          |       |        |           |           |               |                          |                                                                               |      |        |     |     |       |                   |                                                                                                |      |        |    |    |      |                   |                          |                                                                                                                                                                                                                                                                                                                                 |  |            |            |               |                          |                                                                                                                                                            |  |  |  |  |  |  |                                                                                                   |  |  |  |  |  |  |                       |                                                                                                                                                                                                                                                                                                                                 |
|------------------------------------------------------------------------------------------------------------------------------------------------------------------------------------------------------------------------------------------------------------------------------------------------------------------------------------------|------------------------------------------------------------------------------------------------------------------------------------------------------------------------------------------------------------------------------------------------------------------------------------------------------------------------------------|----------------------------------------------------------------------------------------------------------------------------------------------------------------------------------------------------------------------------------------------------------------------------------------------------------------------------------------------------------------------------------------------------------------------------------------------------------------------------------------------------------------------------------------------------------------------------------------------------------------------------------------------------------------------------------------------------------------------------------------------------------------------------------------------------------------------------------------------------------------------------------------------------------------------------------------------------------------------------------------------------------------------------------------------------------------------------------------------------------------------------------------------------------------------------------------------------------------------------------------------------------------------------------------------------------------------------------------------------------------------------------------------------------------------------------------------------------------------------------------------------------------------------------------------------------------------------------------------------------------------------------------------------------------------------------------------------------------------------------------------------------------------------------------------------------------------------------------------------------------------------------------------------------------------------------------------------------------------------------|------------------|---------------|-------------------|------------------------------------|----|------------------|---------------|--------|------------------------------------|----------------------------------------------------------|--|--|--|--|--|--|-------------|-------|--------|-----|----|--------|--------------------|--------------------------|--|--|------------|-----------|---------------|---------------------------|-------------------------------------------------------------------------------|--|--|--|--|--|--|-------------------------------------------------------|--|--|--|--|--|--|-------------|------|--------|-----|-----|--------|-------------------|--------------------------|-------|--------|-----------|-----------|---------------|--------------------------|-------------------------------------------------------------------------------|------|--------|-----|-----|-------|-------------------|------------------------------------------------------------------------------------------------|------|--------|----|----|------|-------------------|--------------------------|---------------------------------------------------------------------------------------------------------------------------------------------------------------------------------------------------------------------------------------------------------------------------------------------------------------------------------|--|------------|------------|---------------|--------------------------|------------------------------------------------------------------------------------------------------------------------------------------------------------|--|--|--|--|--|--|---------------------------------------------------------------------------------------------------|--|--|--|--|--|--|-----------------------|---------------------------------------------------------------------------------------------------------------------------------------------------------------------------------------------------------------------------------------------------------------------------------------------------------------------------------|
|                                                                                                                                                                                                                                                                                                                                          |                                                                                                                                                                                                                                                                                                                                    |                                                                                                                                                                                                                                                                                                                                                                                                                                                                                                                                                                                                                                                                                                                                                                                                                                                                                                                                                                                                                                                                                                                                                                                                                                                                                                                                                                                                                                                                                                                                                                                                                                                                                                                                                                                                                                                                                                                                                                                  |                  | Difference    |                   |                                    |    |                  |               |        |                                    |                                                          |  |  |  |  |  |  |             |       |        |     |    |        |                    |                          |  |  |            |           |               |                           |                                                                               |  |  |  |  |  |  |                                                       |  |  |  |  |  |  |             |      |        |     |     |        |                   |                          |       |        |           |           |               |                          |                                                                               |      |        |     |     |       |                   |                                                                                                |      |        |    |    |      |                   |                          |                                                                                                                                                                                                                                                                                                                                 |  |            |            |               |                          |                                                                                                                                                            |  |  |  |  |  |  |                                                                                                   |  |  |  |  |  |  |                       |                                                                                                                                                                                                                                                                                                                                 |
| <b>Lung function (Pre-bronchodilator FEV1 litres)</b><br>follow up: range 16 weeks to 52 weeks<br>MCID 0.23 litre <sup>6</sup><br>№ of participants: 1646<br>(4 RCTs) <sup>1,2,3</sup><br><br>Importance: IMPORTANT                                                                                                                      | Mean change from baseline in pre-bronchodilator FEV1 (litres) in patients treated with reslizumab compared to placebo were: Eosinophil <400/μL: Mean difference (95% CI) = 0.03 L (-0.07 to 0.14 L), n=392; Eosinophil ≥400/μL: Mean difference (95% CI) = 0.12 L (0.08 to 0.16 L), n=1254. Test for subgroup differences, p=0.13. | 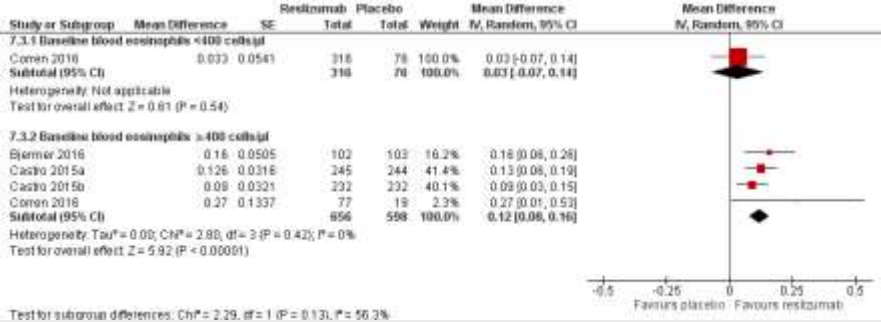 <table border="1"> <thead> <tr> <th>Study or Subgroup</th> <th>Mean Difference</th> <th>SE</th> <th>Reslizumab Total</th> <th>Placebo Total</th> <th>Weight</th> <th>Mean Difference IV, Random, 95% CI</th> </tr> </thead> <tbody> <tr> <td colspan="7"><b>7.3.1 Baseline blood eosinophils &lt;400 cells/μl</b></td> </tr> <tr> <td>Cohen 2016</td> <td>0.033</td> <td>0.0543</td> <td>316</td> <td>76</td> <td>100.0%</td> <td>0.03 [-0.07, 0.14]</td> </tr> <tr> <td><b>Subtotal (95% CI)</b></td> <td></td> <td></td> <td><b>316</b></td> <td><b>76</b></td> <td><b>100.0%</b></td> <td><b>0.03 [-0.07, 0.14]</b></td> </tr> <tr> <td colspan="7">Heterogeneity: Not applicable<br/>Test for overall effect: Z = 0.61 (P = 0.54)</td> </tr> <tr> <td colspan="7"><b>7.3.2 Baseline blood eosinophils ≥400 cells/μl</b></td> </tr> <tr> <td>Biemer 2016</td> <td>0.16</td> <td>0.0505</td> <td>102</td> <td>103</td> <td>16.2%</td> <td>0.16 [0.06, 0.26]</td> </tr> <tr> <td>Castro 2015a</td> <td>0.126</td> <td>0.0316</td> <td>245</td> <td>244</td> <td>41.4%</td> <td>0.13 [0.06, 0.19]</td> </tr> <tr> <td>Castro 2015b</td> <td>0.08</td> <td>0.0321</td> <td>232</td> <td>232</td> <td>40.1%</td> <td>0.09 [0.03, 0.15]</td> </tr> <tr> <td>Cohen 2016</td> <td>0.27</td> <td>0.1337</td> <td>77</td> <td>19</td> <td>2.3%</td> <td>0.27 [0.01, 0.53]</td> </tr> <tr> <td><b>Subtotal (95% CI)</b></td> <td></td> <td></td> <td><b>656</b></td> <td><b>598</b></td> <td><b>100.0%</b></td> <td><b>0.12 [0.08, 0.16]</b></td> </tr> <tr> <td colspan="7">Heterogeneity: Tau<sup>2</sup> = 0.00; Chi<sup>2</sup> = 2.80, df = 3 (P = 0.42); I<sup>2</sup> = 0%<br/>Test for overall effect: Z = 5.92 (P &lt; 0.00001)</td> </tr> <tr> <td colspan="7">Test for subgroup differences: Chi<sup>2</sup> = 2.29, df = 1 (P = 0.13), I<sup>2</sup> = 56.3%</td> </tr> </tbody> </table> |                  |               | Study or Subgroup | Mean Difference                    | SE | Reslizumab Total | Placebo Total | Weight | Mean Difference IV, Random, 95% CI | <b>7.3.1 Baseline blood eosinophils &lt;400 cells/μl</b> |  |  |  |  |  |  | Cohen 2016  | 0.033 | 0.0543 | 316 | 76 | 100.0% | 0.03 [-0.07, 0.14] | <b>Subtotal (95% CI)</b> |  |  | <b>316</b> | <b>76</b> | <b>100.0%</b> | <b>0.03 [-0.07, 0.14]</b> | Heterogeneity: Not applicable<br>Test for overall effect: Z = 0.61 (P = 0.54) |  |  |  |  |  |  | <b>7.3.2 Baseline blood eosinophils ≥400 cells/μl</b> |  |  |  |  |  |  | Biemer 2016 | 0.16 | 0.0505 | 102 | 103 | 16.2%  | 0.16 [0.06, 0.26] | Castro 2015a             | 0.126 | 0.0316 | 245       | 244       | 41.4%         | 0.13 [0.06, 0.19]        | Castro 2015b                                                                  | 0.08 | 0.0321 | 232 | 232 | 40.1% | 0.09 [0.03, 0.15] | Cohen 2016                                                                                     | 0.27 | 0.1337 | 77 | 19 | 2.3% | 0.27 [0.01, 0.53] | <b>Subtotal (95% CI)</b> |                                                                                                                                                                                                                                                                                                                                 |  | <b>656</b> | <b>598</b> | <b>100.0%</b> | <b>0.12 [0.08, 0.16]</b> | Heterogeneity: Tau <sup>2</sup> = 0.00; Chi <sup>2</sup> = 2.80, df = 3 (P = 0.42); I <sup>2</sup> = 0%<br>Test for overall effect: Z = 5.92 (P < 0.00001) |  |  |  |  |  |  | Test for subgroup differences: Chi <sup>2</sup> = 2.29, df = 1 (P = 0.13), I <sup>2</sup> = 56.3% |  |  |  |  |  |  | ⊕⊕⊕○<br>MODERATE<br>a | There is a significant increase in pre-BD FEV1 (litres) with reslizumab compared to placebo in the subgroup of patients with blood eosinophil counts ≥400/μL, whereas there are no differences for those patients with blood eosinophils <400/μL. However there are no statistically significant differences between subgroups. |
| Study or Subgroup                                                                                                                                                                                                                                                                                                                        | Mean Difference                                                                                                                                                                                                                                                                                                                    | SE                                                                                                                                                                                                                                                                                                                                                                                                                                                                                                                                                                                                                                                                                                                                                                                                                                                                                                                                                                                                                                                                                                                                                                                                                                                                                                                                                                                                                                                                                                                                                                                                                                                                                                                                                                                                                                                                                                                                                                               | Reslizumab Total | Placebo Total | Weight            | Mean Difference IV, Random, 95% CI |    |                  |               |        |                                    |                                                          |  |  |  |  |  |  |             |       |        |     |    |        |                    |                          |  |  |            |           |               |                           |                                                                               |  |  |  |  |  |  |                                                       |  |  |  |  |  |  |             |      |        |     |     |        |                   |                          |       |        |           |           |               |                          |                                                                               |      |        |     |     |       |                   |                                                                                                |      |        |    |    |      |                   |                          |                                                                                                                                                                                                                                                                                                                                 |  |            |            |               |                          |                                                                                                                                                            |  |  |  |  |  |  |                                                                                                   |  |  |  |  |  |  |                       |                                                                                                                                                                                                                                                                                                                                 |
| <b>7.3.1 Baseline blood eosinophils &lt;400 cells/μl</b>                                                                                                                                                                                                                                                                                 |                                                                                                                                                                                                                                                                                                                                    |                                                                                                                                                                                                                                                                                                                                                                                                                                                                                                                                                                                                                                                                                                                                                                                                                                                                                                                                                                                                                                                                                                                                                                                                                                                                                                                                                                                                                                                                                                                                                                                                                                                                                                                                                                                                                                                                                                                                                                                  |                  |               |                   |                                    |    |                  |               |        |                                    |                                                          |  |  |  |  |  |  |             |       |        |     |    |        |                    |                          |  |  |            |           |               |                           |                                                                               |  |  |  |  |  |  |                                                       |  |  |  |  |  |  |             |      |        |     |     |        |                   |                          |       |        |           |           |               |                          |                                                                               |      |        |     |     |       |                   |                                                                                                |      |        |    |    |      |                   |                          |                                                                                                                                                                                                                                                                                                                                 |  |            |            |               |                          |                                                                                                                                                            |  |  |  |  |  |  |                                                                                                   |  |  |  |  |  |  |                       |                                                                                                                                                                                                                                                                                                                                 |
| Cohen 2016                                                                                                                                                                                                                                                                                                                               | 0.033                                                                                                                                                                                                                                                                                                                              | 0.0543                                                                                                                                                                                                                                                                                                                                                                                                                                                                                                                                                                                                                                                                                                                                                                                                                                                                                                                                                                                                                                                                                                                                                                                                                                                                                                                                                                                                                                                                                                                                                                                                                                                                                                                                                                                                                                                                                                                                                                           | 316              | 76            | 100.0%            | 0.03 [-0.07, 0.14]                 |    |                  |               |        |                                    |                                                          |  |  |  |  |  |  |             |       |        |     |    |        |                    |                          |  |  |            |           |               |                           |                                                                               |  |  |  |  |  |  |                                                       |  |  |  |  |  |  |             |      |        |     |     |        |                   |                          |       |        |           |           |               |                          |                                                                               |      |        |     |     |       |                   |                                                                                                |      |        |    |    |      |                   |                          |                                                                                                                                                                                                                                                                                                                                 |  |            |            |               |                          |                                                                                                                                                            |  |  |  |  |  |  |                                                                                                   |  |  |  |  |  |  |                       |                                                                                                                                                                                                                                                                                                                                 |
| <b>Subtotal (95% CI)</b>                                                                                                                                                                                                                                                                                                                 |                                                                                                                                                                                                                                                                                                                                    |                                                                                                                                                                                                                                                                                                                                                                                                                                                                                                                                                                                                                                                                                                                                                                                                                                                                                                                                                                                                                                                                                                                                                                                                                                                                                                                                                                                                                                                                                                                                                                                                                                                                                                                                                                                                                                                                                                                                                                                  | <b>316</b>       | <b>76</b>     | <b>100.0%</b>     | <b>0.03 [-0.07, 0.14]</b>          |    |                  |               |        |                                    |                                                          |  |  |  |  |  |  |             |       |        |     |    |        |                    |                          |  |  |            |           |               |                           |                                                                               |  |  |  |  |  |  |                                                       |  |  |  |  |  |  |             |      |        |     |     |        |                   |                          |       |        |           |           |               |                          |                                                                               |      |        |     |     |       |                   |                                                                                                |      |        |    |    |      |                   |                          |                                                                                                                                                                                                                                                                                                                                 |  |            |            |               |                          |                                                                                                                                                            |  |  |  |  |  |  |                                                                                                   |  |  |  |  |  |  |                       |                                                                                                                                                                                                                                                                                                                                 |
| Heterogeneity: Not applicable<br>Test for overall effect: Z = 0.61 (P = 0.54)                                                                                                                                                                                                                                                            |                                                                                                                                                                                                                                                                                                                                    |                                                                                                                                                                                                                                                                                                                                                                                                                                                                                                                                                                                                                                                                                                                                                                                                                                                                                                                                                                                                                                                                                                                                                                                                                                                                                                                                                                                                                                                                                                                                                                                                                                                                                                                                                                                                                                                                                                                                                                                  |                  |               |                   |                                    |    |                  |               |        |                                    |                                                          |  |  |  |  |  |  |             |       |        |     |    |        |                    |                          |  |  |            |           |               |                           |                                                                               |  |  |  |  |  |  |                                                       |  |  |  |  |  |  |             |      |        |     |     |        |                   |                          |       |        |           |           |               |                          |                                                                               |      |        |     |     |       |                   |                                                                                                |      |        |    |    |      |                   |                          |                                                                                                                                                                                                                                                                                                                                 |  |            |            |               |                          |                                                                                                                                                            |  |  |  |  |  |  |                                                                                                   |  |  |  |  |  |  |                       |                                                                                                                                                                                                                                                                                                                                 |
| <b>7.3.2 Baseline blood eosinophils ≥400 cells/μl</b>                                                                                                                                                                                                                                                                                    |                                                                                                                                                                                                                                                                                                                                    |                                                                                                                                                                                                                                                                                                                                                                                                                                                                                                                                                                                                                                                                                                                                                                                                                                                                                                                                                                                                                                                                                                                                                                                                                                                                                                                                                                                                                                                                                                                                                                                                                                                                                                                                                                                                                                                                                                                                                                                  |                  |               |                   |                                    |    |                  |               |        |                                    |                                                          |  |  |  |  |  |  |             |       |        |     |    |        |                    |                          |  |  |            |           |               |                           |                                                                               |  |  |  |  |  |  |                                                       |  |  |  |  |  |  |             |      |        |     |     |        |                   |                          |       |        |           |           |               |                          |                                                                               |      |        |     |     |       |                   |                                                                                                |      |        |    |    |      |                   |                          |                                                                                                                                                                                                                                                                                                                                 |  |            |            |               |                          |                                                                                                                                                            |  |  |  |  |  |  |                                                                                                   |  |  |  |  |  |  |                       |                                                                                                                                                                                                                                                                                                                                 |
| Biemer 2016                                                                                                                                                                                                                                                                                                                              | 0.16                                                                                                                                                                                                                                                                                                                               | 0.0505                                                                                                                                                                                                                                                                                                                                                                                                                                                                                                                                                                                                                                                                                                                                                                                                                                                                                                                                                                                                                                                                                                                                                                                                                                                                                                                                                                                                                                                                                                                                                                                                                                                                                                                                                                                                                                                                                                                                                                           | 102              | 103           | 16.2%             | 0.16 [0.06, 0.26]                  |    |                  |               |        |                                    |                                                          |  |  |  |  |  |  |             |       |        |     |    |        |                    |                          |  |  |            |           |               |                           |                                                                               |  |  |  |  |  |  |                                                       |  |  |  |  |  |  |             |      |        |     |     |        |                   |                          |       |        |           |           |               |                          |                                                                               |      |        |     |     |       |                   |                                                                                                |      |        |    |    |      |                   |                          |                                                                                                                                                                                                                                                                                                                                 |  |            |            |               |                          |                                                                                                                                                            |  |  |  |  |  |  |                                                                                                   |  |  |  |  |  |  |                       |                                                                                                                                                                                                                                                                                                                                 |
| Castro 2015a                                                                                                                                                                                                                                                                                                                             | 0.126                                                                                                                                                                                                                                                                                                                              | 0.0316                                                                                                                                                                                                                                                                                                                                                                                                                                                                                                                                                                                                                                                                                                                                                                                                                                                                                                                                                                                                                                                                                                                                                                                                                                                                                                                                                                                                                                                                                                                                                                                                                                                                                                                                                                                                                                                                                                                                                                           | 245              | 244           | 41.4%             | 0.13 [0.06, 0.19]                  |    |                  |               |        |                                    |                                                          |  |  |  |  |  |  |             |       |        |     |    |        |                    |                          |  |  |            |           |               |                           |                                                                               |  |  |  |  |  |  |                                                       |  |  |  |  |  |  |             |      |        |     |     |        |                   |                          |       |        |           |           |               |                          |                                                                               |      |        |     |     |       |                   |                                                                                                |      |        |    |    |      |                   |                          |                                                                                                                                                                                                                                                                                                                                 |  |            |            |               |                          |                                                                                                                                                            |  |  |  |  |  |  |                                                                                                   |  |  |  |  |  |  |                       |                                                                                                                                                                                                                                                                                                                                 |
| Castro 2015b                                                                                                                                                                                                                                                                                                                             | 0.08                                                                                                                                                                                                                                                                                                                               | 0.0321                                                                                                                                                                                                                                                                                                                                                                                                                                                                                                                                                                                                                                                                                                                                                                                                                                                                                                                                                                                                                                                                                                                                                                                                                                                                                                                                                                                                                                                                                                                                                                                                                                                                                                                                                                                                                                                                                                                                                                           | 232              | 232           | 40.1%             | 0.09 [0.03, 0.15]                  |    |                  |               |        |                                    |                                                          |  |  |  |  |  |  |             |       |        |     |    |        |                    |                          |  |  |            |           |               |                           |                                                                               |  |  |  |  |  |  |                                                       |  |  |  |  |  |  |             |      |        |     |     |        |                   |                          |       |        |           |           |               |                          |                                                                               |      |        |     |     |       |                   |                                                                                                |      |        |    |    |      |                   |                          |                                                                                                                                                                                                                                                                                                                                 |  |            |            |               |                          |                                                                                                                                                            |  |  |  |  |  |  |                                                                                                   |  |  |  |  |  |  |                       |                                                                                                                                                                                                                                                                                                                                 |
| Cohen 2016                                                                                                                                                                                                                                                                                                                               | 0.27                                                                                                                                                                                                                                                                                                                               | 0.1337                                                                                                                                                                                                                                                                                                                                                                                                                                                                                                                                                                                                                                                                                                                                                                                                                                                                                                                                                                                                                                                                                                                                                                                                                                                                                                                                                                                                                                                                                                                                                                                                                                                                                                                                                                                                                                                                                                                                                                           | 77               | 19            | 2.3%              | 0.27 [0.01, 0.53]                  |    |                  |               |        |                                    |                                                          |  |  |  |  |  |  |             |       |        |     |    |        |                    |                          |  |  |            |           |               |                           |                                                                               |  |  |  |  |  |  |                                                       |  |  |  |  |  |  |             |      |        |     |     |        |                   |                          |       |        |           |           |               |                          |                                                                               |      |        |     |     |       |                   |                                                                                                |      |        |    |    |      |                   |                          |                                                                                                                                                                                                                                                                                                                                 |  |            |            |               |                          |                                                                                                                                                            |  |  |  |  |  |  |                                                                                                   |  |  |  |  |  |  |                       |                                                                                                                                                                                                                                                                                                                                 |
| <b>Subtotal (95% CI)</b>                                                                                                                                                                                                                                                                                                                 |                                                                                                                                                                                                                                                                                                                                    |                                                                                                                                                                                                                                                                                                                                                                                                                                                                                                                                                                                                                                                                                                                                                                                                                                                                                                                                                                                                                                                                                                                                                                                                                                                                                                                                                                                                                                                                                                                                                                                                                                                                                                                                                                                                                                                                                                                                                                                  | <b>656</b>       | <b>598</b>    | <b>100.0%</b>     | <b>0.12 [0.08, 0.16]</b>           |    |                  |               |        |                                    |                                                          |  |  |  |  |  |  |             |       |        |     |    |        |                    |                          |  |  |            |           |               |                           |                                                                               |  |  |  |  |  |  |                                                       |  |  |  |  |  |  |             |      |        |     |     |        |                   |                          |       |        |           |           |               |                          |                                                                               |      |        |     |     |       |                   |                                                                                                |      |        |    |    |      |                   |                          |                                                                                                                                                                                                                                                                                                                                 |  |            |            |               |                          |                                                                                                                                                            |  |  |  |  |  |  |                                                                                                   |  |  |  |  |  |  |                       |                                                                                                                                                                                                                                                                                                                                 |
| Heterogeneity: Tau <sup>2</sup> = 0.00; Chi <sup>2</sup> = 2.80, df = 3 (P = 0.42); I <sup>2</sup> = 0%<br>Test for overall effect: Z = 5.92 (P < 0.00001)                                                                                                                                                                               |                                                                                                                                                                                                                                                                                                                                    |                                                                                                                                                                                                                                                                                                                                                                                                                                                                                                                                                                                                                                                                                                                                                                                                                                                                                                                                                                                                                                                                                                                                                                                                                                                                                                                                                                                                                                                                                                                                                                                                                                                                                                                                                                                                                                                                                                                                                                                  |                  |               |                   |                                    |    |                  |               |        |                                    |                                                          |  |  |  |  |  |  |             |       |        |     |    |        |                    |                          |  |  |            |           |               |                           |                                                                               |  |  |  |  |  |  |                                                       |  |  |  |  |  |  |             |      |        |     |     |        |                   |                          |       |        |           |           |               |                          |                                                                               |      |        |     |     |       |                   |                                                                                                |      |        |    |    |      |                   |                          |                                                                                                                                                                                                                                                                                                                                 |  |            |            |               |                          |                                                                                                                                                            |  |  |  |  |  |  |                                                                                                   |  |  |  |  |  |  |                       |                                                                                                                                                                                                                                                                                                                                 |
| Test for subgroup differences: Chi <sup>2</sup> = 2.29, df = 1 (P = 0.13), I <sup>2</sup> = 56.3%                                                                                                                                                                                                                                        |                                                                                                                                                                                                                                                                                                                                    |                                                                                                                                                                                                                                                                                                                                                                                                                                                                                                                                                                                                                                                                                                                                                                                                                                                                                                                                                                                                                                                                                                                                                                                                                                                                                                                                                                                                                                                                                                                                                                                                                                                                                                                                                                                                                                                                                                                                                                                  |                  |               |                   |                                    |    |                  |               |        |                                    |                                                          |  |  |  |  |  |  |             |       |        |     |    |        |                    |                          |  |  |            |           |               |                           |                                                                               |  |  |  |  |  |  |                                                       |  |  |  |  |  |  |             |      |        |     |     |        |                   |                          |       |        |           |           |               |                          |                                                                               |      |        |     |     |       |                   |                                                                                                |      |        |    |    |      |                   |                          |                                                                                                                                                                                                                                                                                                                                 |  |            |            |               |                          |                                                                                                                                                            |  |  |  |  |  |  |                                                                                                   |  |  |  |  |  |  |                       |                                                                                                                                                                                                                                                                                                                                 |
| <b>Lung function (Pre-bronchodilator FEV1 litres)</b><br>follow up: 15 weeks<br>MCID 0.23 litre <sup>6</sup><br>№ of participants: 104<br>(1 RCT) <sup>4</sup><br><u>Study participants meet criteria for the diagnosis of severe asthma defined by the ERS/ATS Guidelines on Severe Asthma<sup>5</sup></u><br><br>Importance: IMPORTANT | Mean change from baseline in pre-bronchodilator FEV1 (litres) in patients treated with reslizumab compared to placebo were: Eosinophil <500/μL: Mean difference (95% CI) = 0.19 L (-0.02 to 0.40 L), n=49; Eosinophil ≥500/μL: Mean difference (95% CI) = 0.25 L (0.01 to 0.49 L), n=55. Test for subgroup differences, p=0.71.    |  <table border="1"> <thead> <tr> <th>Study or Subgroup</th> <th>Mean Difference</th> <th>SE</th> <th>Reslizumab Total</th> <th>Placebo Total</th> <th>Weight</th> <th>Mean Difference IV, Fixed, 95% CI</th> </tr> </thead> <tbody> <tr> <td colspan="7"><b>7.4.1 Baseline blood eosinophils &lt;500 cells/μl</b></td> </tr> <tr> <td>Castro 2011</td> <td>0.19</td> <td>0.1071</td> <td>24</td> <td>25</td> <td>100.0%</td> <td>0.19 [-0.02, 0.40]</td> </tr> <tr> <td><b>Subtotal (95% CI)</b></td> <td></td> <td></td> <td><b>24</b></td> <td><b>25</b></td> <td><b>100.0%</b></td> <td><b>0.19 [-0.02, 0.40]</b></td> </tr> <tr> <td colspan="7">Heterogeneity: Not applicable<br/>Test for overall effect: Z = 1.77 (P = 0.08)</td> </tr> <tr> <td colspan="7"><b>7.4.2 Baseline blood eosinophils ≥500 cells/μl</b></td> </tr> <tr> <td>Castro 2011</td> <td>0.25</td> <td>0.1225</td> <td>28</td> <td>27</td> <td>100.0%</td> <td>0.25 [0.01, 0.49]</td> </tr> <tr> <td><b>Subtotal (95% CI)</b></td> <td></td> <td></td> <td><b>28</b></td> <td><b>27</b></td> <td><b>100.0%</b></td> <td><b>0.25 [0.01, 0.49]</b></td> </tr> <tr> <td colspan="7">Heterogeneity: Not applicable<br/>Test for overall effect: Z = 2.04 (P = 0.04)</td> </tr> <tr> <td colspan="7">Test for subgroup differences: Chi<sup>2</sup> = 0.14, df = 1 (P = 0.71), I<sup>2</sup> = 0%</td> </tr> </tbody> </table>                                                                                                                                                                                                                                                                                                                                                                                                                                                                                           |                  |               | Study or Subgroup | Mean Difference                    | SE | Reslizumab Total | Placebo Total | Weight | Mean Difference IV, Fixed, 95% CI  | <b>7.4.1 Baseline blood eosinophils &lt;500 cells/μl</b> |  |  |  |  |  |  | Castro 2011 | 0.19  | 0.1071 | 24  | 25 | 100.0% | 0.19 [-0.02, 0.40] | <b>Subtotal (95% CI)</b> |  |  | <b>24</b>  | <b>25</b> | <b>100.0%</b> | <b>0.19 [-0.02, 0.40]</b> | Heterogeneity: Not applicable<br>Test for overall effect: Z = 1.77 (P = 0.08) |  |  |  |  |  |  | <b>7.4.2 Baseline blood eosinophils ≥500 cells/μl</b> |  |  |  |  |  |  | Castro 2011 | 0.25 | 0.1225 | 28  | 27  | 100.0% | 0.25 [0.01, 0.49] | <b>Subtotal (95% CI)</b> |       |        | <b>28</b> | <b>27</b> | <b>100.0%</b> | <b>0.25 [0.01, 0.49]</b> | Heterogeneity: Not applicable<br>Test for overall effect: Z = 2.04 (P = 0.04) |      |        |     |     |       |                   | Test for subgroup differences: Chi <sup>2</sup> = 0.14, df = 1 (P = 0.71), I <sup>2</sup> = 0% |      |        |    |    |      |                   | ⊕○○○<br>VERY LOW<br>b,d  | There is a significant increase in pre-BD FEV1 (litres) with reslizumab compared to placebo in the subgroup of patients with blood eosinophil counts ≥500/μL, whereas there are no differences for those patients with blood eosinophils <500/μL. However there are no statistically significant differences between subgroups. |  |            |            |               |                          |                                                                                                                                                            |  |  |  |  |  |  |                                                                                                   |  |  |  |  |  |  |                       |                                                                                                                                                                                                                                                                                                                                 |
| Study or Subgroup                                                                                                                                                                                                                                                                                                                        | Mean Difference                                                                                                                                                                                                                                                                                                                    | SE                                                                                                                                                                                                                                                                                                                                                                                                                                                                                                                                                                                                                                                                                                                                                                                                                                                                                                                                                                                                                                                                                                                                                                                                                                                                                                                                                                                                                                                                                                                                                                                                                                                                                                                                                                                                                                                                                                                                                                               | Reslizumab Total | Placebo Total | Weight            | Mean Difference IV, Fixed, 95% CI  |    |                  |               |        |                                    |                                                          |  |  |  |  |  |  |             |       |        |     |    |        |                    |                          |  |  |            |           |               |                           |                                                                               |  |  |  |  |  |  |                                                       |  |  |  |  |  |  |             |      |        |     |     |        |                   |                          |       |        |           |           |               |                          |                                                                               |      |        |     |     |       |                   |                                                                                                |      |        |    |    |      |                   |                          |                                                                                                                                                                                                                                                                                                                                 |  |            |            |               |                          |                                                                                                                                                            |  |  |  |  |  |  |                                                                                                   |  |  |  |  |  |  |                       |                                                                                                                                                                                                                                                                                                                                 |
| <b>7.4.1 Baseline blood eosinophils &lt;500 cells/μl</b>                                                                                                                                                                                                                                                                                 |                                                                                                                                                                                                                                                                                                                                    |                                                                                                                                                                                                                                                                                                                                                                                                                                                                                                                                                                                                                                                                                                                                                                                                                                                                                                                                                                                                                                                                                                                                                                                                                                                                                                                                                                                                                                                                                                                                                                                                                                                                                                                                                                                                                                                                                                                                                                                  |                  |               |                   |                                    |    |                  |               |        |                                    |                                                          |  |  |  |  |  |  |             |       |        |     |    |        |                    |                          |  |  |            |           |               |                           |                                                                               |  |  |  |  |  |  |                                                       |  |  |  |  |  |  |             |      |        |     |     |        |                   |                          |       |        |           |           |               |                          |                                                                               |      |        |     |     |       |                   |                                                                                                |      |        |    |    |      |                   |                          |                                                                                                                                                                                                                                                                                                                                 |  |            |            |               |                          |                                                                                                                                                            |  |  |  |  |  |  |                                                                                                   |  |  |  |  |  |  |                       |                                                                                                                                                                                                                                                                                                                                 |
| Castro 2011                                                                                                                                                                                                                                                                                                                              | 0.19                                                                                                                                                                                                                                                                                                                               | 0.1071                                                                                                                                                                                                                                                                                                                                                                                                                                                                                                                                                                                                                                                                                                                                                                                                                                                                                                                                                                                                                                                                                                                                                                                                                                                                                                                                                                                                                                                                                                                                                                                                                                                                                                                                                                                                                                                                                                                                                                           | 24               | 25            | 100.0%            | 0.19 [-0.02, 0.40]                 |    |                  |               |        |                                    |                                                          |  |  |  |  |  |  |             |       |        |     |    |        |                    |                          |  |  |            |           |               |                           |                                                                               |  |  |  |  |  |  |                                                       |  |  |  |  |  |  |             |      |        |     |     |        |                   |                          |       |        |           |           |               |                          |                                                                               |      |        |     |     |       |                   |                                                                                                |      |        |    |    |      |                   |                          |                                                                                                                                                                                                                                                                                                                                 |  |            |            |               |                          |                                                                                                                                                            |  |  |  |  |  |  |                                                                                                   |  |  |  |  |  |  |                       |                                                                                                                                                                                                                                                                                                                                 |
| <b>Subtotal (95% CI)</b>                                                                                                                                                                                                                                                                                                                 |                                                                                                                                                                                                                                                                                                                                    |                                                                                                                                                                                                                                                                                                                                                                                                                                                                                                                                                                                                                                                                                                                                                                                                                                                                                                                                                                                                                                                                                                                                                                                                                                                                                                                                                                                                                                                                                                                                                                                                                                                                                                                                                                                                                                                                                                                                                                                  | <b>24</b>        | <b>25</b>     | <b>100.0%</b>     | <b>0.19 [-0.02, 0.40]</b>          |    |                  |               |        |                                    |                                                          |  |  |  |  |  |  |             |       |        |     |    |        |                    |                          |  |  |            |           |               |                           |                                                                               |  |  |  |  |  |  |                                                       |  |  |  |  |  |  |             |      |        |     |     |        |                   |                          |       |        |           |           |               |                          |                                                                               |      |        |     |     |       |                   |                                                                                                |      |        |    |    |      |                   |                          |                                                                                                                                                                                                                                                                                                                                 |  |            |            |               |                          |                                                                                                                                                            |  |  |  |  |  |  |                                                                                                   |  |  |  |  |  |  |                       |                                                                                                                                                                                                                                                                                                                                 |
| Heterogeneity: Not applicable<br>Test for overall effect: Z = 1.77 (P = 0.08)                                                                                                                                                                                                                                                            |                                                                                                                                                                                                                                                                                                                                    |                                                                                                                                                                                                                                                                                                                                                                                                                                                                                                                                                                                                                                                                                                                                                                                                                                                                                                                                                                                                                                                                                                                                                                                                                                                                                                                                                                                                                                                                                                                                                                                                                                                                                                                                                                                                                                                                                                                                                                                  |                  |               |                   |                                    |    |                  |               |        |                                    |                                                          |  |  |  |  |  |  |             |       |        |     |    |        |                    |                          |  |  |            |           |               |                           |                                                                               |  |  |  |  |  |  |                                                       |  |  |  |  |  |  |             |      |        |     |     |        |                   |                          |       |        |           |           |               |                          |                                                                               |      |        |     |     |       |                   |                                                                                                |      |        |    |    |      |                   |                          |                                                                                                                                                                                                                                                                                                                                 |  |            |            |               |                          |                                                                                                                                                            |  |  |  |  |  |  |                                                                                                   |  |  |  |  |  |  |                       |                                                                                                                                                                                                                                                                                                                                 |
| <b>7.4.2 Baseline blood eosinophils ≥500 cells/μl</b>                                                                                                                                                                                                                                                                                    |                                                                                                                                                                                                                                                                                                                                    |                                                                                                                                                                                                                                                                                                                                                                                                                                                                                                                                                                                                                                                                                                                                                                                                                                                                                                                                                                                                                                                                                                                                                                                                                                                                                                                                                                                                                                                                                                                                                                                                                                                                                                                                                                                                                                                                                                                                                                                  |                  |               |                   |                                    |    |                  |               |        |                                    |                                                          |  |  |  |  |  |  |             |       |        |     |    |        |                    |                          |  |  |            |           |               |                           |                                                                               |  |  |  |  |  |  |                                                       |  |  |  |  |  |  |             |      |        |     |     |        |                   |                          |       |        |           |           |               |                          |                                                                               |      |        |     |     |       |                   |                                                                                                |      |        |    |    |      |                   |                          |                                                                                                                                                                                                                                                                                                                                 |  |            |            |               |                          |                                                                                                                                                            |  |  |  |  |  |  |                                                                                                   |  |  |  |  |  |  |                       |                                                                                                                                                                                                                                                                                                                                 |
| Castro 2011                                                                                                                                                                                                                                                                                                                              | 0.25                                                                                                                                                                                                                                                                                                                               | 0.1225                                                                                                                                                                                                                                                                                                                                                                                                                                                                                                                                                                                                                                                                                                                                                                                                                                                                                                                                                                                                                                                                                                                                                                                                                                                                                                                                                                                                                                                                                                                                                                                                                                                                                                                                                                                                                                                                                                                                                                           | 28               | 27            | 100.0%            | 0.25 [0.01, 0.49]                  |    |                  |               |        |                                    |                                                          |  |  |  |  |  |  |             |       |        |     |    |        |                    |                          |  |  |            |           |               |                           |                                                                               |  |  |  |  |  |  |                                                       |  |  |  |  |  |  |             |      |        |     |     |        |                   |                          |       |        |           |           |               |                          |                                                                               |      |        |     |     |       |                   |                                                                                                |      |        |    |    |      |                   |                          |                                                                                                                                                                                                                                                                                                                                 |  |            |            |               |                          |                                                                                                                                                            |  |  |  |  |  |  |                                                                                                   |  |  |  |  |  |  |                       |                                                                                                                                                                                                                                                                                                                                 |
| <b>Subtotal (95% CI)</b>                                                                                                                                                                                                                                                                                                                 |                                                                                                                                                                                                                                                                                                                                    |                                                                                                                                                                                                                                                                                                                                                                                                                                                                                                                                                                                                                                                                                                                                                                                                                                                                                                                                                                                                                                                                                                                                                                                                                                                                                                                                                                                                                                                                                                                                                                                                                                                                                                                                                                                                                                                                                                                                                                                  | <b>28</b>        | <b>27</b>     | <b>100.0%</b>     | <b>0.25 [0.01, 0.49]</b>           |    |                  |               |        |                                    |                                                          |  |  |  |  |  |  |             |       |        |     |    |        |                    |                          |  |  |            |           |               |                           |                                                                               |  |  |  |  |  |  |                                                       |  |  |  |  |  |  |             |      |        |     |     |        |                   |                          |       |        |           |           |               |                          |                                                                               |      |        |     |     |       |                   |                                                                                                |      |        |    |    |      |                   |                          |                                                                                                                                                                                                                                                                                                                                 |  |            |            |               |                          |                                                                                                                                                            |  |  |  |  |  |  |                                                                                                   |  |  |  |  |  |  |                       |                                                                                                                                                                                                                                                                                                                                 |
| Heterogeneity: Not applicable<br>Test for overall effect: Z = 2.04 (P = 0.04)                                                                                                                                                                                                                                                            |                                                                                                                                                                                                                                                                                                                                    |                                                                                                                                                                                                                                                                                                                                                                                                                                                                                                                                                                                                                                                                                                                                                                                                                                                                                                                                                                                                                                                                                                                                                                                                                                                                                                                                                                                                                                                                                                                                                                                                                                                                                                                                                                                                                                                                                                                                                                                  |                  |               |                   |                                    |    |                  |               |        |                                    |                                                          |  |  |  |  |  |  |             |       |        |     |    |        |                    |                          |  |  |            |           |               |                           |                                                                               |  |  |  |  |  |  |                                                       |  |  |  |  |  |  |             |      |        |     |     |        |                   |                          |       |        |           |           |               |                          |                                                                               |      |        |     |     |       |                   |                                                                                                |      |        |    |    |      |                   |                          |                                                                                                                                                                                                                                                                                                                                 |  |            |            |               |                          |                                                                                                                                                            |  |  |  |  |  |  |                                                                                                   |  |  |  |  |  |  |                       |                                                                                                                                                                                                                                                                                                                                 |
| Test for subgroup differences: Chi <sup>2</sup> = 0.14, df = 1 (P = 0.71), I <sup>2</sup> = 0%                                                                                                                                                                                                                                           |                                                                                                                                                                                                                                                                                                                                    |                                                                                                                                                                                                                                                                                                                                                                                                                                                                                                                                                                                                                                                                                                                                                                                                                                                                                                                                                                                                                                                                                                                                                                                                                                                                                                                                                                                                                                                                                                                                                                                                                                                                                                                                                                                                                                                                                                                                                                                  |                  |               |                   |                                    |    |                  |               |        |                                    |                                                          |  |  |  |  |  |  |             |       |        |     |    |        |                    |                          |  |  |            |           |               |                           |                                                                               |  |  |  |  |  |  |                                                       |  |  |  |  |  |  |             |      |        |     |     |        |                   |                          |       |        |           |           |               |                          |                                                                               |      |        |     |     |       |                   |                                                                                                |      |        |    |    |      |                   |                          |                                                                                                                                                                                                                                                                                                                                 |  |            |            |               |                          |                                                                                                                                                            |  |  |  |  |  |  |                                                                                                   |  |  |  |  |  |  |                       |                                                                                                                                                                                                                                                                                                                                 |

| Outcome<br>№ of participants<br>(studies)                                                                                             | Relative effect<br>(95% CI)                                                                                                                                                                                                                                                                                                                                                                                                                    | Anticipated absolute effects (95% CI)                                                                                                                                                                                                                                                                                                                                                                                                                                                                                                                                                                                                                                                                                                                                                                                                                                                                                                                                                                                                                                                                                                                                                                                                                                                                                                                                                                                                                                                                                                                                                                                                                                                                                                                                                                                                                              |            |            | Certainty         | What happens      |    |            |            |        |            |            |       |       |                   |                   |                                                       |  |  |  |  |  |  |  |             |         |        |     |     |        |                   |  |                   |  |  |     |     |        |                   |                                                                                  |  |  |  |  |  |  |                                                       |  |  |  |  |  |  |  |             |         |        |     |     |        |                   |  |                   |  |  |     |     |        |                   |                                                                                  |  |  |  |  |  |  |                                                       |  |  |  |  |  |  |  |             |         |        |     |     |        |                   |  |                   |  |  |     |     |        |                   |                                                                                  |  |  |  |  |  |  |                            |                                                                                                                                                                                                                                       |
|---------------------------------------------------------------------------------------------------------------------------------------|------------------------------------------------------------------------------------------------------------------------------------------------------------------------------------------------------------------------------------------------------------------------------------------------------------------------------------------------------------------------------------------------------------------------------------------------|--------------------------------------------------------------------------------------------------------------------------------------------------------------------------------------------------------------------------------------------------------------------------------------------------------------------------------------------------------------------------------------------------------------------------------------------------------------------------------------------------------------------------------------------------------------------------------------------------------------------------------------------------------------------------------------------------------------------------------------------------------------------------------------------------------------------------------------------------------------------------------------------------------------------------------------------------------------------------------------------------------------------------------------------------------------------------------------------------------------------------------------------------------------------------------------------------------------------------------------------------------------------------------------------------------------------------------------------------------------------------------------------------------------------------------------------------------------------------------------------------------------------------------------------------------------------------------------------------------------------------------------------------------------------------------------------------------------------------------------------------------------------------------------------------------------------------------------------------------------------|------------|------------|-------------------|-------------------|----|------------|------------|--------|------------|------------|-------|-------|-------------------|-------------------|-------------------------------------------------------|--|--|--|--|--|--|--|-------------|---------|--------|-----|-----|--------|-------------------|--|-------------------|--|--|-----|-----|--------|-------------------|----------------------------------------------------------------------------------|--|--|--|--|--|--|-------------------------------------------------------|--|--|--|--|--|--|--|-------------|---------|--------|-----|-----|--------|-------------------|--|-------------------|--|--|-----|-----|--------|-------------------|----------------------------------------------------------------------------------|--|--|--|--|--|--|-------------------------------------------------------|--|--|--|--|--|--|--|-------------|---------|--------|-----|-----|--------|-------------------|--|-------------------|--|--|-----|-----|--------|-------------------|----------------------------------------------------------------------------------|--|--|--|--|--|--|----------------------------|---------------------------------------------------------------------------------------------------------------------------------------------------------------------------------------------------------------------------------------|
|                                                                                                                                       |                                                                                                                                                                                                                                                                                                                                                                                                                                                |                                                                                                                                                                                                                                                                                                                                                                                                                                                                                                                                                                                                                                                                                                                                                                                                                                                                                                                                                                                                                                                                                                                                                                                                                                                                                                                                                                                                                                                                                                                                                                                                                                                                                                                                                                                                                                                                    |            | Difference |                   |                   |    |            |            |        |            |            |       |       |                   |                   |                                                       |  |  |  |  |  |  |  |             |         |        |     |     |        |                   |  |                   |  |  |     |     |        |                   |                                                                                  |  |  |  |  |  |  |                                                       |  |  |  |  |  |  |  |             |         |        |     |     |        |                   |  |                   |  |  |     |     |        |                   |                                                                                  |  |  |  |  |  |  |                                                       |  |  |  |  |  |  |  |             |         |        |     |     |        |                   |  |                   |  |  |     |     |        |                   |                                                                                  |  |  |  |  |  |  |                            |                                                                                                                                                                                                                                       |
| <b>Rate of any exacerbation</b><br>follow up: 52 weeks<br>№ of participants: 953<br>(2 RCTs) <sup>2</sup><br><br>Importance: CRITICAL | Annualised mean exacerbation rates per patient treated with reslizumab compared to placebo were:<br>Eosinophil ≥400/μL: 0.84 versus 1.81 events/patient/year, Rate ratio (95%CI) = 0.46 (0.37, 0.58), n=953.<br>Eosinophil ≥500/μL: Rate ratio (95%CI) = 0.49 (0.37 to 0.65), n=567; Eosinophil ≥700/μL: Rate ratio (95%CI) = 0.41 (0.28 to 0.60), n=344. Exacerbation rates were not specified for the subgroups ≥500 and ≥700 eosinophils/μL | <table><thead><tr><th rowspan="2">Study or Subgroup</th><th rowspan="2">log[Rate Ratio]</th><th rowspan="2">SE</th><th>Reslizumab</th><th>Placebo</th><th rowspan="2">Weight</th><th>Rate Ratio</th><th>Rate Ratio</th></tr><tr><th>Total</th><th>Total</th><th>IV, Fixed, 95% CI</th><th>IV, Fixed, 95% CI</th></tr></thead><tbody><tr><td colspan="8"><b>7.5.1 Baseline blood eosinophils ≥400 cells/μl</b></td></tr><tr><td>Castro 2015</td><td>-0.7695</td><td>0.1147</td><td>477</td><td>476</td><td>100.0%</td><td>0.46 [0.37, 0.58]</td><td rowspan="4"></td></tr><tr><td>Subtotal (95% CI)</td><td></td><td></td><td>477</td><td>476</td><td>100.0%</td><td>0.46 [0.37, 0.58]</td></tr><tr><td colspan="7">Heterogeneity: Not applicable<br/>Test for overall effect: Z = 6.71 (P &lt; 0.00001)</td></tr><tr><td colspan="8"><b>7.5.2 Baseline blood eosinophils ≥500 cells/μl</b></td></tr><tr><td>Castro 2015</td><td>-0.7133</td><td>0.1442</td><td>281</td><td>286</td><td>100.0%</td><td>0.49 [0.37, 0.65]</td><td rowspan="4"></td></tr><tr><td>Subtotal (95% CI)</td><td></td><td></td><td>281</td><td>286</td><td>100.0%</td><td>0.49 [0.37, 0.65]</td></tr><tr><td colspan="7">Heterogeneity: Not applicable<br/>Test for overall effect: Z = 4.95 (P &lt; 0.00001)</td></tr><tr><td colspan="8"><b>7.5.3 Baseline blood eosinophils ≥700 cells/μl</b></td></tr><tr><td>Castro 2015</td><td>-0.8916</td><td>0.1946</td><td>172</td><td>172</td><td>100.0%</td><td>0.41 [0.28, 0.60]</td><td rowspan="3"></td></tr><tr><td>Subtotal (95% CI)</td><td></td><td></td><td>172</td><td>172</td><td>100.0%</td><td>0.41 [0.28, 0.60]</td></tr><tr><td colspan="7">Heterogeneity: Not applicable<br/>Test for overall effect: Z = 4.58 (P &lt; 0.00001)</td></tr></tbody></table> <div><br/>0.5 0.7 1 1.5 2<br/>Favours reslizumab Favours placebo</div> |            |            | Study or Subgroup | log[Rate Ratio]   | SE | Reslizumab | Placebo    | Weight | Rate Ratio | Rate Ratio | Total | Total | IV, Fixed, 95% CI | IV, Fixed, 95% CI | <b>7.5.1 Baseline blood eosinophils ≥400 cells/μl</b> |  |  |  |  |  |  |  | Castro 2015 | -0.7695 | 0.1147 | 477 | 476 | 100.0% | 0.46 [0.37, 0.58] |  | Subtotal (95% CI) |  |  | 477 | 476 | 100.0% | 0.46 [0.37, 0.58] | Heterogeneity: Not applicable<br>Test for overall effect: Z = 6.71 (P < 0.00001) |  |  |  |  |  |  | <b>7.5.2 Baseline blood eosinophils ≥500 cells/μl</b> |  |  |  |  |  |  |  | Castro 2015 | -0.7133 | 0.1442 | 281 | 286 | 100.0% | 0.49 [0.37, 0.65] |  | Subtotal (95% CI) |  |  | 281 | 286 | 100.0% | 0.49 [0.37, 0.65] | Heterogeneity: Not applicable<br>Test for overall effect: Z = 4.95 (P < 0.00001) |  |  |  |  |  |  | <b>7.5.3 Baseline blood eosinophils ≥700 cells/μl</b> |  |  |  |  |  |  |  | Castro 2015 | -0.8916 | 0.1946 | 172 | 172 | 100.0% | 0.41 [0.28, 0.60] |  | Subtotal (95% CI) |  |  | 172 | 172 | 100.0% | 0.41 [0.28, 0.60] | Heterogeneity: Not applicable<br>Test for overall effect: Z = 4.58 (P < 0.00001) |  |  |  |  |  |  | ⊕⊕○○<br>LOW <sup>a,b</sup> | There are significant reductions in exacerbation rates with reslizumab compared to placebo in those patients with baseline blood eosinophil counts ≥400/μL, ≥500/μL and ≥700/μL. However there is appreciable overlap of the 95% CIs. |
| Study or Subgroup                                                                                                                     | log[Rate Ratio]                                                                                                                                                                                                                                                                                                                                                                                                                                | SE                                                                                                                                                                                                                                                                                                                                                                                                                                                                                                                                                                                                                                                                                                                                                                                                                                                                                                                                                                                                                                                                                                                                                                                                                                                                                                                                                                                                                                                                                                                                                                                                                                                                                                                                                                                                                                                                 | Reslizumab | Placebo    |                   |                   |    | Weight     | Rate Ratio |        | Rate Ratio |            |       |       |                   |                   |                                                       |  |  |  |  |  |  |  |             |         |        |     |     |        |                   |  |                   |  |  |     |     |        |                   |                                                                                  |  |  |  |  |  |  |                                                       |  |  |  |  |  |  |  |             |         |        |     |     |        |                   |  |                   |  |  |     |     |        |                   |                                                                                  |  |  |  |  |  |  |                                                       |  |  |  |  |  |  |  |             |         |        |     |     |        |                   |  |                   |  |  |     |     |        |                   |                                                                                  |  |  |  |  |  |  |                            |                                                                                                                                                                                                                                       |
|                                                                                                                                       |                                                                                                                                                                                                                                                                                                                                                                                                                                                |                                                                                                                                                                                                                                                                                                                                                                                                                                                                                                                                                                                                                                                                                                                                                                                                                                                                                                                                                                                                                                                                                                                                                                                                                                                                                                                                                                                                                                                                                                                                                                                                                                                                                                                                                                                                                                                                    | Total      | Total      | IV, Fixed, 95% CI | IV, Fixed, 95% CI |    |            |            |        |            |            |       |       |                   |                   |                                                       |  |  |  |  |  |  |  |             |         |        |     |     |        |                   |  |                   |  |  |     |     |        |                   |                                                                                  |  |  |  |  |  |  |                                                       |  |  |  |  |  |  |  |             |         |        |     |     |        |                   |  |                   |  |  |     |     |        |                   |                                                                                  |  |  |  |  |  |  |                                                       |  |  |  |  |  |  |  |             |         |        |     |     |        |                   |  |                   |  |  |     |     |        |                   |                                                                                  |  |  |  |  |  |  |                            |                                                                                                                                                                                                                                       |
| <b>7.5.1 Baseline blood eosinophils ≥400 cells/μl</b>                                                                                 |                                                                                                                                                                                                                                                                                                                                                                                                                                                |                                                                                                                                                                                                                                                                                                                                                                                                                                                                                                                                                                                                                                                                                                                                                                                                                                                                                                                                                                                                                                                                                                                                                                                                                                                                                                                                                                                                                                                                                                                                                                                                                                                                                                                                                                                                                                                                    |            |            |                   |                   |    |            |            |        |            |            |       |       |                   |                   |                                                       |  |  |  |  |  |  |  |             |         |        |     |     |        |                   |  |                   |  |  |     |     |        |                   |                                                                                  |  |  |  |  |  |  |                                                       |  |  |  |  |  |  |  |             |         |        |     |     |        |                   |  |                   |  |  |     |     |        |                   |                                                                                  |  |  |  |  |  |  |                                                       |  |  |  |  |  |  |  |             |         |        |     |     |        |                   |  |                   |  |  |     |     |        |                   |                                                                                  |  |  |  |  |  |  |                            |                                                                                                                                                                                                                                       |
| Castro 2015                                                                                                                           | -0.7695                                                                                                                                                                                                                                                                                                                                                                                                                                        | 0.1147                                                                                                                                                                                                                                                                                                                                                                                                                                                                                                                                                                                                                                                                                                                                                                                                                                                                                                                                                                                                                                                                                                                                                                                                                                                                                                                                                                                                                                                                                                                                                                                                                                                                                                                                                                                                                                                             | 477        | 476        | 100.0%            | 0.46 [0.37, 0.58] |    |            |            |        |            |            |       |       |                   |                   |                                                       |  |  |  |  |  |  |  |             |         |        |     |     |        |                   |  |                   |  |  |     |     |        |                   |                                                                                  |  |  |  |  |  |  |                                                       |  |  |  |  |  |  |  |             |         |        |     |     |        |                   |  |                   |  |  |     |     |        |                   |                                                                                  |  |  |  |  |  |  |                                                       |  |  |  |  |  |  |  |             |         |        |     |     |        |                   |  |                   |  |  |     |     |        |                   |                                                                                  |  |  |  |  |  |  |                            |                                                                                                                                                                                                                                       |
| Subtotal (95% CI)                                                                                                                     |                                                                                                                                                                                                                                                                                                                                                                                                                                                |                                                                                                                                                                                                                                                                                                                                                                                                                                                                                                                                                                                                                                                                                                                                                                                                                                                                                                                                                                                                                                                                                                                                                                                                                                                                                                                                                                                                                                                                                                                                                                                                                                                                                                                                                                                                                                                                    | 477        | 476        | 100.0%            | 0.46 [0.37, 0.58] |    |            |            |        |            |            |       |       |                   |                   |                                                       |  |  |  |  |  |  |  |             |         |        |     |     |        |                   |  |                   |  |  |     |     |        |                   |                                                                                  |  |  |  |  |  |  |                                                       |  |  |  |  |  |  |  |             |         |        |     |     |        |                   |  |                   |  |  |     |     |        |                   |                                                                                  |  |  |  |  |  |  |                                                       |  |  |  |  |  |  |  |             |         |        |     |     |        |                   |  |                   |  |  |     |     |        |                   |                                                                                  |  |  |  |  |  |  |                            |                                                                                                                                                                                                                                       |
| Heterogeneity: Not applicable<br>Test for overall effect: Z = 6.71 (P < 0.00001)                                                      |                                                                                                                                                                                                                                                                                                                                                                                                                                                |                                                                                                                                                                                                                                                                                                                                                                                                                                                                                                                                                                                                                                                                                                                                                                                                                                                                                                                                                                                                                                                                                                                                                                                                                                                                                                                                                                                                                                                                                                                                                                                                                                                                                                                                                                                                                                                                    |            |            |                   |                   |    |            |            |        |            |            |       |       |                   |                   |                                                       |  |  |  |  |  |  |  |             |         |        |     |     |        |                   |  |                   |  |  |     |     |        |                   |                                                                                  |  |  |  |  |  |  |                                                       |  |  |  |  |  |  |  |             |         |        |     |     |        |                   |  |                   |  |  |     |     |        |                   |                                                                                  |  |  |  |  |  |  |                                                       |  |  |  |  |  |  |  |             |         |        |     |     |        |                   |  |                   |  |  |     |     |        |                   |                                                                                  |  |  |  |  |  |  |                            |                                                                                                                                                                                                                                       |
| <b>7.5.2 Baseline blood eosinophils ≥500 cells/μl</b>                                                                                 |                                                                                                                                                                                                                                                                                                                                                                                                                                                |                                                                                                                                                                                                                                                                                                                                                                                                                                                                                                                                                                                                                                                                                                                                                                                                                                                                                                                                                                                                                                                                                                                                                                                                                                                                                                                                                                                                                                                                                                                                                                                                                                                                                                                                                                                                                                                                    |            |            |                   |                   |    |            |            |        |            |            |       |       |                   |                   |                                                       |  |  |  |  |  |  |  |             |         |        |     |     |        |                   |  |                   |  |  |     |     |        |                   |                                                                                  |  |  |  |  |  |  |                                                       |  |  |  |  |  |  |  |             |         |        |     |     |        |                   |  |                   |  |  |     |     |        |                   |                                                                                  |  |  |  |  |  |  |                                                       |  |  |  |  |  |  |  |             |         |        |     |     |        |                   |  |                   |  |  |     |     |        |                   |                                                                                  |  |  |  |  |  |  |                            |                                                                                                                                                                                                                                       |
| Castro 2015                                                                                                                           | -0.7133                                                                                                                                                                                                                                                                                                                                                                                                                                        | 0.1442                                                                                                                                                                                                                                                                                                                                                                                                                                                                                                                                                                                                                                                                                                                                                                                                                                                                                                                                                                                                                                                                                                                                                                                                                                                                                                                                                                                                                                                                                                                                                                                                                                                                                                                                                                                                                                                             | 281        | 286        | 100.0%            | 0.49 [0.37, 0.65] |    |            |            |        |            |            |       |       |                   |                   |                                                       |  |  |  |  |  |  |  |             |         |        |     |     |        |                   |  |                   |  |  |     |     |        |                   |                                                                                  |  |  |  |  |  |  |                                                       |  |  |  |  |  |  |  |             |         |        |     |     |        |                   |  |                   |  |  |     |     |        |                   |                                                                                  |  |  |  |  |  |  |                                                       |  |  |  |  |  |  |  |             |         |        |     |     |        |                   |  |                   |  |  |     |     |        |                   |                                                                                  |  |  |  |  |  |  |                            |                                                                                                                                                                                                                                       |
| Subtotal (95% CI)                                                                                                                     |                                                                                                                                                                                                                                                                                                                                                                                                                                                |                                                                                                                                                                                                                                                                                                                                                                                                                                                                                                                                                                                                                                                                                                                                                                                                                                                                                                                                                                                                                                                                                                                                                                                                                                                                                                                                                                                                                                                                                                                                                                                                                                                                                                                                                                                                                                                                    | 281        | 286        | 100.0%            | 0.49 [0.37, 0.65] |    |            |            |        |            |            |       |       |                   |                   |                                                       |  |  |  |  |  |  |  |             |         |        |     |     |        |                   |  |                   |  |  |     |     |        |                   |                                                                                  |  |  |  |  |  |  |                                                       |  |  |  |  |  |  |  |             |         |        |     |     |        |                   |  |                   |  |  |     |     |        |                   |                                                                                  |  |  |  |  |  |  |                                                       |  |  |  |  |  |  |  |             |         |        |     |     |        |                   |  |                   |  |  |     |     |        |                   |                                                                                  |  |  |  |  |  |  |                            |                                                                                                                                                                                                                                       |
| Heterogeneity: Not applicable<br>Test for overall effect: Z = 4.95 (P < 0.00001)                                                      |                                                                                                                                                                                                                                                                                                                                                                                                                                                |                                                                                                                                                                                                                                                                                                                                                                                                                                                                                                                                                                                                                                                                                                                                                                                                                                                                                                                                                                                                                                                                                                                                                                                                                                                                                                                                                                                                                                                                                                                                                                                                                                                                                                                                                                                                                                                                    |            |            |                   |                   |    |            |            |        |            |            |       |       |                   |                   |                                                       |  |  |  |  |  |  |  |             |         |        |     |     |        |                   |  |                   |  |  |     |     |        |                   |                                                                                  |  |  |  |  |  |  |                                                       |  |  |  |  |  |  |  |             |         |        |     |     |        |                   |  |                   |  |  |     |     |        |                   |                                                                                  |  |  |  |  |  |  |                                                       |  |  |  |  |  |  |  |             |         |        |     |     |        |                   |  |                   |  |  |     |     |        |                   |                                                                                  |  |  |  |  |  |  |                            |                                                                                                                                                                                                                                       |
| <b>7.5.3 Baseline blood eosinophils ≥700 cells/μl</b>                                                                                 |                                                                                                                                                                                                                                                                                                                                                                                                                                                |                                                                                                                                                                                                                                                                                                                                                                                                                                                                                                                                                                                                                                                                                                                                                                                                                                                                                                                                                                                                                                                                                                                                                                                                                                                                                                                                                                                                                                                                                                                                                                                                                                                                                                                                                                                                                                                                    |            |            |                   |                   |    |            |            |        |            |            |       |       |                   |                   |                                                       |  |  |  |  |  |  |  |             |         |        |     |     |        |                   |  |                   |  |  |     |     |        |                   |                                                                                  |  |  |  |  |  |  |                                                       |  |  |  |  |  |  |  |             |         |        |     |     |        |                   |  |                   |  |  |     |     |        |                   |                                                                                  |  |  |  |  |  |  |                                                       |  |  |  |  |  |  |  |             |         |        |     |     |        |                   |  |                   |  |  |     |     |        |                   |                                                                                  |  |  |  |  |  |  |                            |                                                                                                                                                                                                                                       |
| Castro 2015                                                                                                                           | -0.8916                                                                                                                                                                                                                                                                                                                                                                                                                                        | 0.1946                                                                                                                                                                                                                                                                                                                                                                                                                                                                                                                                                                                                                                                                                                                                                                                                                                                                                                                                                                                                                                                                                                                                                                                                                                                                                                                                                                                                                                                                                                                                                                                                                                                                                                                                                                                                                                                             | 172        | 172        | 100.0%            | 0.41 [0.28, 0.60] |    |            |            |        |            |            |       |       |                   |                   |                                                       |  |  |  |  |  |  |  |             |         |        |     |     |        |                   |  |                   |  |  |     |     |        |                   |                                                                                  |  |  |  |  |  |  |                                                       |  |  |  |  |  |  |  |             |         |        |     |     |        |                   |  |                   |  |  |     |     |        |                   |                                                                                  |  |  |  |  |  |  |                                                       |  |  |  |  |  |  |  |             |         |        |     |     |        |                   |  |                   |  |  |     |     |        |                   |                                                                                  |  |  |  |  |  |  |                            |                                                                                                                                                                                                                                       |
| Subtotal (95% CI)                                                                                                                     |                                                                                                                                                                                                                                                                                                                                                                                                                                                |                                                                                                                                                                                                                                                                                                                                                                                                                                                                                                                                                                                                                                                                                                                                                                                                                                                                                                                                                                                                                                                                                                                                                                                                                                                                                                                                                                                                                                                                                                                                                                                                                                                                                                                                                                                                                                                                    | 172        | 172        | 100.0%            | 0.41 [0.28, 0.60] |    |            |            |        |            |            |       |       |                   |                   |                                                       |  |  |  |  |  |  |  |             |         |        |     |     |        |                   |  |                   |  |  |     |     |        |                   |                                                                                  |  |  |  |  |  |  |                                                       |  |  |  |  |  |  |  |             |         |        |     |     |        |                   |  |                   |  |  |     |     |        |                   |                                                                                  |  |  |  |  |  |  |                                                       |  |  |  |  |  |  |  |             |         |        |     |     |        |                   |  |                   |  |  |     |     |        |                   |                                                                                  |  |  |  |  |  |  |                            |                                                                                                                                                                                                                                       |
| Heterogeneity: Not applicable<br>Test for overall effect: Z = 4.58 (P < 0.00001)                                                      |                                                                                                                                                                                                                                                                                                                                                                                                                                                |                                                                                                                                                                                                                                                                                                                                                                                                                                                                                                                                                                                                                                                                                                                                                                                                                                                                                                                                                                                                                                                                                                                                                                                                                                                                                                                                                                                                                                                                                                                                                                                                                                                                                                                                                                                                                                                                    |            |            |                   |                   |    |            |            |        |            |            |       |       |                   |                   |                                                       |  |  |  |  |  |  |  |             |         |        |     |     |        |                   |  |                   |  |  |     |     |        |                   |                                                                                  |  |  |  |  |  |  |                                                       |  |  |  |  |  |  |  |             |         |        |     |     |        |                   |  |                   |  |  |     |     |        |                   |                                                                                  |  |  |  |  |  |  |                                                       |  |  |  |  |  |  |  |             |         |        |     |     |        |                   |  |                   |  |  |     |     |        |                   |                                                                                  |  |  |  |  |  |  |                            |                                                                                                                                                                                                                                       |

| Outcome<br>№ of participants<br>(studies)                                                                                                           | Relative effect<br>(95% CI)                                                                                                                                                                                                                                                                                                                                                                                                                                                                                  | Anticipated absolute effects (95% CI)                                                                                                                                                                                                                                                                                                                                                                                                                                                                                                                                                                                                                                                                                                                                                                                                                                                                                                                                                                                                                                                                                                                                                                                                                                                                                                                                                                                                                                                                                                                                                                         |               |                                   |            | Certainty         | What happens                  |                            |        |                                   |                                                       |  |  |  |  |              |           |           |      |                   |              |            |            |       |                   |              |            |            |       |                   |                          |            |            |               |                          |                      |  |  |  |  |                                                                     |  |  |  |  |                                               |  |  |  |  |                                                          |  |  |  |  |             |            |          |        |                   |                          |            |           |               |                          |                     |  |  |  |  |                               |  |  |  |  |                                                |  |  |  |  |                                    |                                                                                                                                                                                                                                                                                                   |
|-----------------------------------------------------------------------------------------------------------------------------------------------------|--------------------------------------------------------------------------------------------------------------------------------------------------------------------------------------------------------------------------------------------------------------------------------------------------------------------------------------------------------------------------------------------------------------------------------------------------------------------------------------------------------------|---------------------------------------------------------------------------------------------------------------------------------------------------------------------------------------------------------------------------------------------------------------------------------------------------------------------------------------------------------------------------------------------------------------------------------------------------------------------------------------------------------------------------------------------------------------------------------------------------------------------------------------------------------------------------------------------------------------------------------------------------------------------------------------------------------------------------------------------------------------------------------------------------------------------------------------------------------------------------------------------------------------------------------------------------------------------------------------------------------------------------------------------------------------------------------------------------------------------------------------------------------------------------------------------------------------------------------------------------------------------------------------------------------------------------------------------------------------------------------------------------------------------------------------------------------------------------------------------------------------|---------------|-----------------------------------|------------|-------------------|-------------------------------|----------------------------|--------|-----------------------------------|-------------------------------------------------------|--|--|--|--|--------------|-----------|-----------|------|-------------------|--------------|------------|------------|-------|-------------------|--------------|------------|------------|-------|-------------------|--------------------------|------------|------------|---------------|--------------------------|----------------------|--|--|--|--|---------------------------------------------------------------------|--|--|--|--|-----------------------------------------------|--|--|--|--|----------------------------------------------------------|--|--|--|--|-------------|------------|----------|--------|-------------------|--------------------------|------------|-----------|---------------|--------------------------|---------------------|--|--|--|--|-------------------------------|--|--|--|--|------------------------------------------------|--|--|--|--|------------------------------------|---------------------------------------------------------------------------------------------------------------------------------------------------------------------------------------------------------------------------------------------------------------------------------------------------|
|                                                                                                                                                     |                                                                                                                                                                                                                                                                                                                                                                                                                                                                                                              |                                                                                                                                                                                                                                                                                                                                                                                                                                                                                                                                                                                                                                                                                                                                                                                                                                                                                                                                                                                                                                                                                                                                                                                                                                                                                                                                                                                                                                                                                                                                                                                                               |               |                                   | Difference |                   |                               |                            |        |                                   |                                                       |  |  |  |  |              |           |           |      |                   |              |            |            |       |                   |              |            |            |       |                   |                          |            |            |               |                          |                      |  |  |  |  |                                                                     |  |  |  |  |                                               |  |  |  |  |                                                          |  |  |  |  |             |            |          |        |                   |                          |            |           |               |                          |                     |  |  |  |  |                               |  |  |  |  |                                                |  |  |  |  |                                    |                                                                                                                                                                                                                                                                                                   |
| <b>Adverse events</b><br>follow up: range 16 weeks to 52 weeks<br>№ of participants: 1652<br>(4 RCTs) <sup>1,2,3</sup><br><br>Importance: IMPORTANT | <p>The proportion of patients treated with reslizumab who had any adverse event compared to placebo were:<br/>Eosinophil ≥ 400/μL: 75% versus 81.6%, RR (95%CI) = 0.92 (0.87 to 0.97), Absolute effect = 65 fewer per 1,000 (from 106 fewer to 24 fewer), n=1160. Unspecified baseline blood eosinophil counts: 54.9% versus 74.2%, RR (95%CI) = 0.74 (0.64 to 0.86), Absolute effect = 193 fewer per 1,000 (from 267 fewer to 104 fewer), n=492. Test for subgroup differences, p=0.008. <sup>e,f</sup></p> | <table><tr><th>Study or Subgroup</th><th>Reslizumab<br/>Events<br/>Total</th><th>Placebo<br/>Events<br/>Total</th><th>Weight</th><th>Risk Ratio<br/>M-H, Random, 95% CI</th></tr><tr><td colspan="5"><b>7.6.1 Baseline blood eosinophils ≥400 cells/μl</b></td></tr><tr><td>Bjermer 2016</td><td>61<br/>103</td><td>66<br/>105</td><td>7.0%</td><td>0.94 [0.76, 1.17]</td></tr><tr><td>Castro 2015a</td><td>197<br/>245</td><td>206<br/>243</td><td>49.9%</td><td>0.95 [0.87, 1.03]</td></tr><tr><td>Castro 2015b</td><td>177<br/>232</td><td>201<br/>232</td><td>43.1%</td><td>0.88 [0.81, 0.96]</td></tr><tr><td><b>Subtotal (95% CI)</b></td><td><b>580</b></td><td><b>580</b></td><td><b>100.0%</b></td><td><b>0.92 [0.87, 0.97]</b></td></tr><tr><td colspan="5">Total events 435 473</td></tr><tr><td colspan="5">Heterogeneity: Tau² = 0.00; Chi² = 1.54, df = 2 (P = 0.46); I² = 0%</td></tr><tr><td colspan="5">Test for overall effect: Z = 2.90 (P = 0.004)</td></tr><tr><td colspan="5"><b>7.6.2 Unspecified baseline blood eosinophil count</b></td></tr><tr><td>Corren 2016</td><td>217<br/>395</td><td>72<br/>97</td><td>100.0%</td><td>0.74 [0.64, 0.86]</td></tr><tr><td><b>Subtotal (95% CI)</b></td><td><b>395</b></td><td><b>97</b></td><td><b>100.0%</b></td><td><b>0.74 [0.64, 0.86]</b></td></tr><tr><td colspan="5">Total events 217 72</td></tr><tr><td colspan="5">Heterogeneity: Not applicable</td></tr><tr><td colspan="5">Test for overall effect: Z = 4.00 (P &lt; 0.0001)</td></tr></table> <p>Test for subgroup differences: Chi² = 7.13, df = 1 (P = 0.008), I² = 86.0%</p> |               |                                   |            | Study or Subgroup | Reslizumab<br>Events<br>Total | Placebo<br>Events<br>Total | Weight | Risk Ratio<br>M-H, Random, 95% CI | <b>7.6.1 Baseline blood eosinophils ≥400 cells/μl</b> |  |  |  |  | Bjermer 2016 | 61<br>103 | 66<br>105 | 7.0% | 0.94 [0.76, 1.17] | Castro 2015a | 197<br>245 | 206<br>243 | 49.9% | 0.95 [0.87, 1.03] | Castro 2015b | 177<br>232 | 201<br>232 | 43.1% | 0.88 [0.81, 0.96] | <b>Subtotal (95% CI)</b> | <b>580</b> | <b>580</b> | <b>100.0%</b> | <b>0.92 [0.87, 0.97]</b> | Total events 435 473 |  |  |  |  | Heterogeneity: Tau² = 0.00; Chi² = 1.54, df = 2 (P = 0.46); I² = 0% |  |  |  |  | Test for overall effect: Z = 2.90 (P = 0.004) |  |  |  |  | <b>7.6.2 Unspecified baseline blood eosinophil count</b> |  |  |  |  | Corren 2016 | 217<br>395 | 72<br>97 | 100.0% | 0.74 [0.64, 0.86] | <b>Subtotal (95% CI)</b> | <b>395</b> | <b>97</b> | <b>100.0%</b> | <b>0.74 [0.64, 0.86]</b> | Total events 217 72 |  |  |  |  | Heterogeneity: Not applicable |  |  |  |  | Test for overall effect: Z = 4.00 (P < 0.0001) |  |  |  |  | <p>⊕⊕○○<br/>LOW <sup>a,g</sup></p> | <p>There are significant decreases in the incidence of adverse events with reslizumab compared to placebo in patients with baseline blood eosinophil counts ≥400/μL and with unspecified baseline blood eosinophil counts. There are statistically significant differences between subgroups.</p> |
| Study or Subgroup                                                                                                                                   | Reslizumab<br>Events<br>Total                                                                                                                                                                                                                                                                                                                                                                                                                                                                                | Placebo<br>Events<br>Total                                                                                                                                                                                                                                                                                                                                                                                                                                                                                                                                                                                                                                                                                                                                                                                                                                                                                                                                                                                                                                                                                                                                                                                                                                                                                                                                                                                                                                                                                                                                                                                    | Weight        | Risk Ratio<br>M-H, Random, 95% CI |            |                   |                               |                            |        |                                   |                                                       |  |  |  |  |              |           |           |      |                   |              |            |            |       |                   |              |            |            |       |                   |                          |            |            |               |                          |                      |  |  |  |  |                                                                     |  |  |  |  |                                               |  |  |  |  |                                                          |  |  |  |  |             |            |          |        |                   |                          |            |           |               |                          |                     |  |  |  |  |                               |  |  |  |  |                                                |  |  |  |  |                                    |                                                                                                                                                                                                                                                                                                   |
| <b>7.6.1 Baseline blood eosinophils ≥400 cells/μl</b>                                                                                               |                                                                                                                                                                                                                                                                                                                                                                                                                                                                                                              |                                                                                                                                                                                                                                                                                                                                                                                                                                                                                                                                                                                                                                                                                                                                                                                                                                                                                                                                                                                                                                                                                                                                                                                                                                                                                                                                                                                                                                                                                                                                                                                                               |               |                                   |            |                   |                               |                            |        |                                   |                                                       |  |  |  |  |              |           |           |      |                   |              |            |            |       |                   |              |            |            |       |                   |                          |            |            |               |                          |                      |  |  |  |  |                                                                     |  |  |  |  |                                               |  |  |  |  |                                                          |  |  |  |  |             |            |          |        |                   |                          |            |           |               |                          |                     |  |  |  |  |                               |  |  |  |  |                                                |  |  |  |  |                                    |                                                                                                                                                                                                                                                                                                   |
| Bjermer 2016                                                                                                                                        | 61<br>103                                                                                                                                                                                                                                                                                                                                                                                                                                                                                                    | 66<br>105                                                                                                                                                                                                                                                                                                                                                                                                                                                                                                                                                                                                                                                                                                                                                                                                                                                                                                                                                                                                                                                                                                                                                                                                                                                                                                                                                                                                                                                                                                                                                                                                     | 7.0%          | 0.94 [0.76, 1.17]                 |            |                   |                               |                            |        |                                   |                                                       |  |  |  |  |              |           |           |      |                   |              |            |            |       |                   |              |            |            |       |                   |                          |            |            |               |                          |                      |  |  |  |  |                                                                     |  |  |  |  |                                               |  |  |  |  |                                                          |  |  |  |  |             |            |          |        |                   |                          |            |           |               |                          |                     |  |  |  |  |                               |  |  |  |  |                                                |  |  |  |  |                                    |                                                                                                                                                                                                                                                                                                   |
| Castro 2015a                                                                                                                                        | 197<br>245                                                                                                                                                                                                                                                                                                                                                                                                                                                                                                   | 206<br>243                                                                                                                                                                                                                                                                                                                                                                                                                                                                                                                                                                                                                                                                                                                                                                                                                                                                                                                                                                                                                                                                                                                                                                                                                                                                                                                                                                                                                                                                                                                                                                                                    | 49.9%         | 0.95 [0.87, 1.03]                 |            |                   |                               |                            |        |                                   |                                                       |  |  |  |  |              |           |           |      |                   |              |            |            |       |                   |              |            |            |       |                   |                          |            |            |               |                          |                      |  |  |  |  |                                                                     |  |  |  |  |                                               |  |  |  |  |                                                          |  |  |  |  |             |            |          |        |                   |                          |            |           |               |                          |                     |  |  |  |  |                               |  |  |  |  |                                                |  |  |  |  |                                    |                                                                                                                                                                                                                                                                                                   |
| Castro 2015b                                                                                                                                        | 177<br>232                                                                                                                                                                                                                                                                                                                                                                                                                                                                                                   | 201<br>232                                                                                                                                                                                                                                                                                                                                                                                                                                                                                                                                                                                                                                                                                                                                                                                                                                                                                                                                                                                                                                                                                                                                                                                                                                                                                                                                                                                                                                                                                                                                                                                                    | 43.1%         | 0.88 [0.81, 0.96]                 |            |                   |                               |                            |        |                                   |                                                       |  |  |  |  |              |           |           |      |                   |              |            |            |       |                   |              |            |            |       |                   |                          |            |            |               |                          |                      |  |  |  |  |                                                                     |  |  |  |  |                                               |  |  |  |  |                                                          |  |  |  |  |             |            |          |        |                   |                          |            |           |               |                          |                     |  |  |  |  |                               |  |  |  |  |                                                |  |  |  |  |                                    |                                                                                                                                                                                                                                                                                                   |
| <b>Subtotal (95% CI)</b>                                                                                                                            | <b>580</b>                                                                                                                                                                                                                                                                                                                                                                                                                                                                                                   | <b>580</b>                                                                                                                                                                                                                                                                                                                                                                                                                                                                                                                                                                                                                                                                                                                                                                                                                                                                                                                                                                                                                                                                                                                                                                                                                                                                                                                                                                                                                                                                                                                                                                                                    | <b>100.0%</b> | <b>0.92 [0.87, 0.97]</b>          |            |                   |                               |                            |        |                                   |                                                       |  |  |  |  |              |           |           |      |                   |              |            |            |       |                   |              |            |            |       |                   |                          |            |            |               |                          |                      |  |  |  |  |                                                                     |  |  |  |  |                                               |  |  |  |  |                                                          |  |  |  |  |             |            |          |        |                   |                          |            |           |               |                          |                     |  |  |  |  |                               |  |  |  |  |                                                |  |  |  |  |                                    |                                                                                                                                                                                                                                                                                                   |
| Total events 435 473                                                                                                                                |                                                                                                                                                                                                                                                                                                                                                                                                                                                                                                              |                                                                                                                                                                                                                                                                                                                                                                                                                                                                                                                                                                                                                                                                                                                                                                                                                                                                                                                                                                                                                                                                                                                                                                                                                                                                                                                                                                                                                                                                                                                                                                                                               |               |                                   |            |                   |                               |                            |        |                                   |                                                       |  |  |  |  |              |           |           |      |                   |              |            |            |       |                   |              |            |            |       |                   |                          |            |            |               |                          |                      |  |  |  |  |                                                                     |  |  |  |  |                                               |  |  |  |  |                                                          |  |  |  |  |             |            |          |        |                   |                          |            |           |               |                          |                     |  |  |  |  |                               |  |  |  |  |                                                |  |  |  |  |                                    |                                                                                                                                                                                                                                                                                                   |
| Heterogeneity: Tau² = 0.00; Chi² = 1.54, df = 2 (P = 0.46); I² = 0%                                                                                 |                                                                                                                                                                                                                                                                                                                                                                                                                                                                                                              |                                                                                                                                                                                                                                                                                                                                                                                                                                                                                                                                                                                                                                                                                                                                                                                                                                                                                                                                                                                                                                                                                                                                                                                                                                                                                                                                                                                                                                                                                                                                                                                                               |               |                                   |            |                   |                               |                            |        |                                   |                                                       |  |  |  |  |              |           |           |      |                   |              |            |            |       |                   |              |            |            |       |                   |                          |            |            |               |                          |                      |  |  |  |  |                                                                     |  |  |  |  |                                               |  |  |  |  |                                                          |  |  |  |  |             |            |          |        |                   |                          |            |           |               |                          |                     |  |  |  |  |                               |  |  |  |  |                                                |  |  |  |  |                                    |                                                                                                                                                                                                                                                                                                   |
| Test for overall effect: Z = 2.90 (P = 0.004)                                                                                                       |                                                                                                                                                                                                                                                                                                                                                                                                                                                                                                              |                                                                                                                                                                                                                                                                                                                                                                                                                                                                                                                                                                                                                                                                                                                                                                                                                                                                                                                                                                                                                                                                                                                                                                                                                                                                                                                                                                                                                                                                                                                                                                                                               |               |                                   |            |                   |                               |                            |        |                                   |                                                       |  |  |  |  |              |           |           |      |                   |              |            |            |       |                   |              |            |            |       |                   |                          |            |            |               |                          |                      |  |  |  |  |                                                                     |  |  |  |  |                                               |  |  |  |  |                                                          |  |  |  |  |             |            |          |        |                   |                          |            |           |               |                          |                     |  |  |  |  |                               |  |  |  |  |                                                |  |  |  |  |                                    |                                                                                                                                                                                                                                                                                                   |
| <b>7.6.2 Unspecified baseline blood eosinophil count</b>                                                                                            |                                                                                                                                                                                                                                                                                                                                                                                                                                                                                                              |                                                                                                                                                                                                                                                                                                                                                                                                                                                                                                                                                                                                                                                                                                                                                                                                                                                                                                                                                                                                                                                                                                                                                                                                                                                                                                                                                                                                                                                                                                                                                                                                               |               |                                   |            |                   |                               |                            |        |                                   |                                                       |  |  |  |  |              |           |           |      |                   |              |            |            |       |                   |              |            |            |       |                   |                          |            |            |               |                          |                      |  |  |  |  |                                                                     |  |  |  |  |                                               |  |  |  |  |                                                          |  |  |  |  |             |            |          |        |                   |                          |            |           |               |                          |                     |  |  |  |  |                               |  |  |  |  |                                                |  |  |  |  |                                    |                                                                                                                                                                                                                                                                                                   |
| Corren 2016                                                                                                                                         | 217<br>395                                                                                                                                                                                                                                                                                                                                                                                                                                                                                                   | 72<br>97                                                                                                                                                                                                                                                                                                                                                                                                                                                                                                                                                                                                                                                                                                                                                                                                                                                                                                                                                                                                                                                                                                                                                                                                                                                                                                                                                                                                                                                                                                                                                                                                      | 100.0%        | 0.74 [0.64, 0.86]                 |            |                   |                               |                            |        |                                   |                                                       |  |  |  |  |              |           |           |      |                   |              |            |            |       |                   |              |            |            |       |                   |                          |            |            |               |                          |                      |  |  |  |  |                                                                     |  |  |  |  |                                               |  |  |  |  |                                                          |  |  |  |  |             |            |          |        |                   |                          |            |           |               |                          |                     |  |  |  |  |                               |  |  |  |  |                                                |  |  |  |  |                                    |                                                                                                                                                                                                                                                                                                   |
| <b>Subtotal (95% CI)</b>                                                                                                                            | <b>395</b>                                                                                                                                                                                                                                                                                                                                                                                                                                                                                                   | <b>97</b>                                                                                                                                                                                                                                                                                                                                                                                                                                                                                                                                                                                                                                                                                                                                                                                                                                                                                                                                                                                                                                                                                                                                                                                                                                                                                                                                                                                                                                                                                                                                                                                                     | <b>100.0%</b> | <b>0.74 [0.64, 0.86]</b>          |            |                   |                               |                            |        |                                   |                                                       |  |  |  |  |              |           |           |      |                   |              |            |            |       |                   |              |            |            |       |                   |                          |            |            |               |                          |                      |  |  |  |  |                                                                     |  |  |  |  |                                               |  |  |  |  |                                                          |  |  |  |  |             |            |          |        |                   |                          |            |           |               |                          |                     |  |  |  |  |                               |  |  |  |  |                                                |  |  |  |  |                                    |                                                                                                                                                                                                                                                                                                   |
| Total events 217 72                                                                                                                                 |                                                                                                                                                                                                                                                                                                                                                                                                                                                                                                              |                                                                                                                                                                                                                                                                                                                                                                                                                                                                                                                                                                                                                                                                                                                                                                                                                                                                                                                                                                                                                                                                                                                                                                                                                                                                                                                                                                                                                                                                                                                                                                                                               |               |                                   |            |                   |                               |                            |        |                                   |                                                       |  |  |  |  |              |           |           |      |                   |              |            |            |       |                   |              |            |            |       |                   |                          |            |            |               |                          |                      |  |  |  |  |                                                                     |  |  |  |  |                                               |  |  |  |  |                                                          |  |  |  |  |             |            |          |        |                   |                          |            |           |               |                          |                     |  |  |  |  |                               |  |  |  |  |                                                |  |  |  |  |                                    |                                                                                                                                                                                                                                                                                                   |
| Heterogeneity: Not applicable                                                                                                                       |                                                                                                                                                                                                                                                                                                                                                                                                                                                                                                              |                                                                                                                                                                                                                                                                                                                                                                                                                                                                                                                                                                                                                                                                                                                                                                                                                                                                                                                                                                                                                                                                                                                                                                                                                                                                                                                                                                                                                                                                                                                                                                                                               |               |                                   |            |                   |                               |                            |        |                                   |                                                       |  |  |  |  |              |           |           |      |                   |              |            |            |       |                   |              |            |            |       |                   |                          |            |            |               |                          |                      |  |  |  |  |                                                                     |  |  |  |  |                                               |  |  |  |  |                                                          |  |  |  |  |             |            |          |        |                   |                          |            |           |               |                          |                     |  |  |  |  |                               |  |  |  |  |                                                |  |  |  |  |                                    |                                                                                                                                                                                                                                                                                                   |
| Test for overall effect: Z = 4.00 (P < 0.0001)                                                                                                      |                                                                                                                                                                                                                                                                                                                                                                                                                                                                                                              |                                                                                                                                                                                                                                                                                                                                                                                                                                                                                                                                                                                                                                                                                                                                                                                                                                                                                                                                                                                                                                                                                                                                                                                                                                                                                                                                                                                                                                                                                                                                                                                                               |               |                                   |            |                   |                               |                            |        |                                   |                                                       |  |  |  |  |              |           |           |      |                   |              |            |            |       |                   |              |            |            |       |                   |                          |            |            |               |                          |                      |  |  |  |  |                                                                     |  |  |  |  |                                               |  |  |  |  |                                                          |  |  |  |  |             |            |          |        |                   |                          |            |           |               |                          |                     |  |  |  |  |                               |  |  |  |  |                                                |  |  |  |  |                                    |                                                                                                                                                                                                                                                                                                   |



| Outcome<br>№ of participants<br>(studies)                                                                                                                   | Relative effect<br>(95% CI)                                                                                                                                                                                                                                                                                                                                                                                                                                                                                                                                                                                                                                                                                                                                                                                                                                                                                                                                                                                                                                                                                                                                                                                                                                                                                                                                                                                                                                                                                                                                                                                                                                                                                                                                                                                                                                                                                                                                                                                                                                                                                                                                                                                                                                                                                                                                        | Anticipated absolute effects (95% CI) |                      | Certainty           | What happens      |                                   |        |                                   |                                                       |  |  |  |  |  |  |              |   |     |   |     |      |                    |              |    |     |    |     |       |                   |              |    |     |    |     |       |                   |                          |  |            |  |            |               |                          |              |    |  |    |  |  |  |                                                                                                          |  |  |  |  |  |  |                                              |  |  |  |  |  |  |                                                          |  |  |  |  |  |  |             |    |     |   |    |        |                   |                          |  |            |  |           |               |                          |              |    |  |   |  |  |  |                               |  |  |  |  |  |  |                                              |  |  |  |  |  |  |                                                                                                |  |  |  |  |  |  |                                  |                                                                                                                                                                                                                                                                                                                 |
|-------------------------------------------------------------------------------------------------------------------------------------------------------------|--------------------------------------------------------------------------------------------------------------------------------------------------------------------------------------------------------------------------------------------------------------------------------------------------------------------------------------------------------------------------------------------------------------------------------------------------------------------------------------------------------------------------------------------------------------------------------------------------------------------------------------------------------------------------------------------------------------------------------------------------------------------------------------------------------------------------------------------------------------------------------------------------------------------------------------------------------------------------------------------------------------------------------------------------------------------------------------------------------------------------------------------------------------------------------------------------------------------------------------------------------------------------------------------------------------------------------------------------------------------------------------------------------------------------------------------------------------------------------------------------------------------------------------------------------------------------------------------------------------------------------------------------------------------------------------------------------------------------------------------------------------------------------------------------------------------------------------------------------------------------------------------------------------------------------------------------------------------------------------------------------------------------------------------------------------------------------------------------------------------------------------------------------------------------------------------------------------------------------------------------------------------------------------------------------------------------------------------------------------------|---------------------------------------|----------------------|---------------------|-------------------|-----------------------------------|--------|-----------------------------------|-------------------------------------------------------|--|--|--|--|--|--|--------------|---|-----|---|-----|------|--------------------|--------------|----|-----|----|-----|-------|-------------------|--------------|----|-----|----|-----|-------|-------------------|--------------------------|--|------------|--|------------|---------------|--------------------------|--------------|----|--|----|--|--|--|----------------------------------------------------------------------------------------------------------|--|--|--|--|--|--|----------------------------------------------|--|--|--|--|--|--|----------------------------------------------------------|--|--|--|--|--|--|-------------|----|-----|---|----|--------|-------------------|--------------------------|--|------------|--|-----------|---------------|--------------------------|--------------|----|--|---|--|--|--|-------------------------------|--|--|--|--|--|--|----------------------------------------------|--|--|--|--|--|--|------------------------------------------------------------------------------------------------|--|--|--|--|--|--|----------------------------------|-----------------------------------------------------------------------------------------------------------------------------------------------------------------------------------------------------------------------------------------------------------------------------------------------------------------|
|                                                                                                                                                             |                                                                                                                                                                                                                                                                                                                                                                                                                                                                                                                                                                                                                                                                                                                                                                                                                                                                                                                                                                                                                                                                                                                                                                                                                                                                                                                                                                                                                                                                                                                                                                                                                                                                                                                                                                                                                                                                                                                                                                                                                                                                                                                                                                                                                                                                                                                                                                    |                                       | Difference           |                     |                   |                                   |        |                                   |                                                       |  |  |  |  |  |  |              |   |     |   |     |      |                    |              |    |     |    |     |       |                   |              |    |     |    |     |       |                   |                          |  |            |  |            |               |                          |              |    |  |    |  |  |  |                                                                                                          |  |  |  |  |  |  |                                              |  |  |  |  |  |  |                                                          |  |  |  |  |  |  |             |    |     |   |    |        |                   |                          |  |            |  |           |               |                          |              |    |  |   |  |  |  |                               |  |  |  |  |  |  |                                              |  |  |  |  |  |  |                                                                                                |  |  |  |  |  |  |                                  |                                                                                                                                                                                                                                                                                                                 |
| <b>Serious adverse events</b><br>follow up: range 16 weeks to 52 weeks<br>№ of participants: 1652<br>(4 RCTs) <sup>1,2,3</sup><br><br>Importance: IMPORTANT | <p>The proportion of patients treated with reslizumab who had any serious adverse event compared to placebo were: Eosinophil ≥ 400/μL: 7.9% versus 10.0%, RR (95%CI) = 0.79 (0.51 to 1.22), Absolute effect = 21 fewer per 1,000 (from 49 fewer to 22 more), n=1160. Unspecified baseline blood eosinophil counts: 4.1% versus 4.1%, RR (95%CI) = 0.98 (0.34 to 2.87), Absolute effect = 1 fewer per 1,000 (from 27 fewer to 77 more), n=492. Test for subgroup differences, p=0.71.<sup>e</sup></p> <table><tr><th>Study or Subgroup</th><th>Reslizumab<br/>Events</th><th>Reslizumab<br/>Total</th><th>Placebo<br/>Events</th><th>Placebo<br/>Total</th><th>Weight</th><th>Risk Ratio<br/>M-H, Random, 95% CI</th></tr><tr><td colspan="7"><b>7.7.1 Baseline blood eosinophils ≥400 cells/μL</b></td></tr><tr><td>Bjermer 2016</td><td>4</td><td>103</td><td>1</td><td>105</td><td>4.0%</td><td>4.08 [0.46, 35.87]</td></tr><tr><td>Castro 2015a</td><td>24</td><td>245</td><td>34</td><td>243</td><td>54.2%</td><td>0.70 [0.43, 1.14]</td></tr><tr><td>Castro 2015b</td><td>18</td><td>232</td><td>23</td><td>232</td><td>41.8%</td><td>0.78 [0.43, 1.41]</td></tr><tr><td><b>Subtotal (95% CI)</b></td><td></td><td><b>580</b></td><td></td><td><b>580</b></td><td><b>100.0%</b></td><td><b>0.79 [0.51, 1.22]</b></td></tr><tr><td>Total events</td><td>46</td><td></td><td>58</td><td></td><td></td><td></td></tr><tr><td colspan="7">Heterogeneity: Tau<sup>2</sup> = 0.03; Chi<sup>2</sup> = 2.42, df = 2 (P = 0.30); I<sup>2</sup> = 17%</td></tr><tr><td colspan="7">Test for overall effect: Z = 1.07 (P = 0.28)</td></tr><tr><td colspan="7"><b>7.7.2 Unspecified baseline blood eosinophil count</b></td></tr><tr><td>Corren 2016</td><td>16</td><td>395</td><td>4</td><td>97</td><td>100.0%</td><td>0.98 [0.34, 2.87]</td></tr><tr><td><b>Subtotal (95% CI)</b></td><td></td><td><b>395</b></td><td></td><td><b>97</b></td><td><b>100.0%</b></td><td><b>0.98 [0.34, 2.87]</b></td></tr><tr><td>Total events</td><td>16</td><td></td><td>4</td><td></td><td></td><td></td></tr><tr><td colspan="7">Heterogeneity: Not applicable</td></tr><tr><td colspan="7">Test for overall effect: Z = 0.03 (P = 0.97)</td></tr><tr><td colspan="7">Test for subgroup differences: Chi<sup>2</sup> = 0.14, df = 1 (P = 0.71), I<sup>2</sup> = 0%</td></tr></table> | Study or Subgroup                     | Reslizumab<br>Events | Reslizumab<br>Total | Placebo<br>Events | Placebo<br>Total                  | Weight | Risk Ratio<br>M-H, Random, 95% CI | <b>7.7.1 Baseline blood eosinophils ≥400 cells/μL</b> |  |  |  |  |  |  | Bjermer 2016 | 4 | 103 | 1 | 105 | 4.0% | 4.08 [0.46, 35.87] | Castro 2015a | 24 | 245 | 34 | 243 | 54.2% | 0.70 [0.43, 1.14] | Castro 2015b | 18 | 232 | 23 | 232 | 41.8% | 0.78 [0.43, 1.41] | <b>Subtotal (95% CI)</b> |  | <b>580</b> |  | <b>580</b> | <b>100.0%</b> | <b>0.79 [0.51, 1.22]</b> | Total events | 46 |  | 58 |  |  |  | Heterogeneity: Tau <sup>2</sup> = 0.03; Chi <sup>2</sup> = 2.42, df = 2 (P = 0.30); I <sup>2</sup> = 17% |  |  |  |  |  |  | Test for overall effect: Z = 1.07 (P = 0.28) |  |  |  |  |  |  | <b>7.7.2 Unspecified baseline blood eosinophil count</b> |  |  |  |  |  |  | Corren 2016 | 16 | 395 | 4 | 97 | 100.0% | 0.98 [0.34, 2.87] | <b>Subtotal (95% CI)</b> |  | <b>395</b> |  | <b>97</b> | <b>100.0%</b> | <b>0.98 [0.34, 2.87]</b> | Total events | 16 |  | 4 |  |  |  | Heterogeneity: Not applicable |  |  |  |  |  |  | Test for overall effect: Z = 0.03 (P = 0.97) |  |  |  |  |  |  | Test for subgroup differences: Chi <sup>2</sup> = 0.14, df = 1 (P = 0.71), I <sup>2</sup> = 0% |  |  |  |  |  |  | <p>⊕⊕⊕○<br/>MODERATE<br/>a,h</p> | <p>There are no significant increases in the incidence of serious adverse events with reslizumab compared to placebo in patients with baseline blood eosinophil counts ≥400/μL and with unspecified baseline blood eosinophil counts. There are no statistically significant differences between subgroups.</p> |
| Study or Subgroup                                                                                                                                           | Reslizumab<br>Events                                                                                                                                                                                                                                                                                                                                                                                                                                                                                                                                                                                                                                                                                                                                                                                                                                                                                                                                                                                                                                                                                                                                                                                                                                                                                                                                                                                                                                                                                                                                                                                                                                                                                                                                                                                                                                                                                                                                                                                                                                                                                                                                                                                                                                                                                                                                               | Reslizumab<br>Total                   | Placebo<br>Events    | Placebo<br>Total    | Weight            | Risk Ratio<br>M-H, Random, 95% CI |        |                                   |                                                       |  |  |  |  |  |  |              |   |     |   |     |      |                    |              |    |     |    |     |       |                   |              |    |     |    |     |       |                   |                          |  |            |  |            |               |                          |              |    |  |    |  |  |  |                                                                                                          |  |  |  |  |  |  |                                              |  |  |  |  |  |  |                                                          |  |  |  |  |  |  |             |    |     |   |    |        |                   |                          |  |            |  |           |               |                          |              |    |  |   |  |  |  |                               |  |  |  |  |  |  |                                              |  |  |  |  |  |  |                                                                                                |  |  |  |  |  |  |                                  |                                                                                                                                                                                                                                                                                                                 |
| <b>7.7.1 Baseline blood eosinophils ≥400 cells/μL</b>                                                                                                       |                                                                                                                                                                                                                                                                                                                                                                                                                                                                                                                                                                                                                                                                                                                                                                                                                                                                                                                                                                                                                                                                                                                                                                                                                                                                                                                                                                                                                                                                                                                                                                                                                                                                                                                                                                                                                                                                                                                                                                                                                                                                                                                                                                                                                                                                                                                                                                    |                                       |                      |                     |                   |                                   |        |                                   |                                                       |  |  |  |  |  |  |              |   |     |   |     |      |                    |              |    |     |    |     |       |                   |              |    |     |    |     |       |                   |                          |  |            |  |            |               |                          |              |    |  |    |  |  |  |                                                                                                          |  |  |  |  |  |  |                                              |  |  |  |  |  |  |                                                          |  |  |  |  |  |  |             |    |     |   |    |        |                   |                          |  |            |  |           |               |                          |              |    |  |   |  |  |  |                               |  |  |  |  |  |  |                                              |  |  |  |  |  |  |                                                                                                |  |  |  |  |  |  |                                  |                                                                                                                                                                                                                                                                                                                 |
| Bjermer 2016                                                                                                                                                | 4                                                                                                                                                                                                                                                                                                                                                                                                                                                                                                                                                                                                                                                                                                                                                                                                                                                                                                                                                                                                                                                                                                                                                                                                                                                                                                                                                                                                                                                                                                                                                                                                                                                                                                                                                                                                                                                                                                                                                                                                                                                                                                                                                                                                                                                                                                                                                                  | 103                                   | 1                    | 105                 | 4.0%              | 4.08 [0.46, 35.87]                |        |                                   |                                                       |  |  |  |  |  |  |              |   |     |   |     |      |                    |              |    |     |    |     |       |                   |              |    |     |    |     |       |                   |                          |  |            |  |            |               |                          |              |    |  |    |  |  |  |                                                                                                          |  |  |  |  |  |  |                                              |  |  |  |  |  |  |                                                          |  |  |  |  |  |  |             |    |     |   |    |        |                   |                          |  |            |  |           |               |                          |              |    |  |   |  |  |  |                               |  |  |  |  |  |  |                                              |  |  |  |  |  |  |                                                                                                |  |  |  |  |  |  |                                  |                                                                                                                                                                                                                                                                                                                 |
| Castro 2015a                                                                                                                                                | 24                                                                                                                                                                                                                                                                                                                                                                                                                                                                                                                                                                                                                                                                                                                                                                                                                                                                                                                                                                                                                                                                                                                                                                                                                                                                                                                                                                                                                                                                                                                                                                                                                                                                                                                                                                                                                                                                                                                                                                                                                                                                                                                                                                                                                                                                                                                                                                 | 245                                   | 34                   | 243                 | 54.2%             | 0.70 [0.43, 1.14]                 |        |                                   |                                                       |  |  |  |  |  |  |              |   |     |   |     |      |                    |              |    |     |    |     |       |                   |              |    |     |    |     |       |                   |                          |  |            |  |            |               |                          |              |    |  |    |  |  |  |                                                                                                          |  |  |  |  |  |  |                                              |  |  |  |  |  |  |                                                          |  |  |  |  |  |  |             |    |     |   |    |        |                   |                          |  |            |  |           |               |                          |              |    |  |   |  |  |  |                               |  |  |  |  |  |  |                                              |  |  |  |  |  |  |                                                                                                |  |  |  |  |  |  |                                  |                                                                                                                                                                                                                                                                                                                 |
| Castro 2015b                                                                                                                                                | 18                                                                                                                                                                                                                                                                                                                                                                                                                                                                                                                                                                                                                                                                                                                                                                                                                                                                                                                                                                                                                                                                                                                                                                                                                                                                                                                                                                                                                                                                                                                                                                                                                                                                                                                                                                                                                                                                                                                                                                                                                                                                                                                                                                                                                                                                                                                                                                 | 232                                   | 23                   | 232                 | 41.8%             | 0.78 [0.43, 1.41]                 |        |                                   |                                                       |  |  |  |  |  |  |              |   |     |   |     |      |                    |              |    |     |    |     |       |                   |              |    |     |    |     |       |                   |                          |  |            |  |            |               |                          |              |    |  |    |  |  |  |                                                                                                          |  |  |  |  |  |  |                                              |  |  |  |  |  |  |                                                          |  |  |  |  |  |  |             |    |     |   |    |        |                   |                          |  |            |  |           |               |                          |              |    |  |   |  |  |  |                               |  |  |  |  |  |  |                                              |  |  |  |  |  |  |                                                                                                |  |  |  |  |  |  |                                  |                                                                                                                                                                                                                                                                                                                 |
| <b>Subtotal (95% CI)</b>                                                                                                                                    |                                                                                                                                                                                                                                                                                                                                                                                                                                                                                                                                                                                                                                                                                                                                                                                                                                                                                                                                                                                                                                                                                                                                                                                                                                                                                                                                                                                                                                                                                                                                                                                                                                                                                                                                                                                                                                                                                                                                                                                                                                                                                                                                                                                                                                                                                                                                                                    | <b>580</b>                            |                      | <b>580</b>          | <b>100.0%</b>     | <b>0.79 [0.51, 1.22]</b>          |        |                                   |                                                       |  |  |  |  |  |  |              |   |     |   |     |      |                    |              |    |     |    |     |       |                   |              |    |     |    |     |       |                   |                          |  |            |  |            |               |                          |              |    |  |    |  |  |  |                                                                                                          |  |  |  |  |  |  |                                              |  |  |  |  |  |  |                                                          |  |  |  |  |  |  |             |    |     |   |    |        |                   |                          |  |            |  |           |               |                          |              |    |  |   |  |  |  |                               |  |  |  |  |  |  |                                              |  |  |  |  |  |  |                                                                                                |  |  |  |  |  |  |                                  |                                                                                                                                                                                                                                                                                                                 |
| Total events                                                                                                                                                | 46                                                                                                                                                                                                                                                                                                                                                                                                                                                                                                                                                                                                                                                                                                                                                                                                                                                                                                                                                                                                                                                                                                                                                                                                                                                                                                                                                                                                                                                                                                                                                                                                                                                                                                                                                                                                                                                                                                                                                                                                                                                                                                                                                                                                                                                                                                                                                                 |                                       | 58                   |                     |                   |                                   |        |                                   |                                                       |  |  |  |  |  |  |              |   |     |   |     |      |                    |              |    |     |    |     |       |                   |              |    |     |    |     |       |                   |                          |  |            |  |            |               |                          |              |    |  |    |  |  |  |                                                                                                          |  |  |  |  |  |  |                                              |  |  |  |  |  |  |                                                          |  |  |  |  |  |  |             |    |     |   |    |        |                   |                          |  |            |  |           |               |                          |              |    |  |   |  |  |  |                               |  |  |  |  |  |  |                                              |  |  |  |  |  |  |                                                                                                |  |  |  |  |  |  |                                  |                                                                                                                                                                                                                                                                                                                 |
| Heterogeneity: Tau <sup>2</sup> = 0.03; Chi <sup>2</sup> = 2.42, df = 2 (P = 0.30); I <sup>2</sup> = 17%                                                    |                                                                                                                                                                                                                                                                                                                                                                                                                                                                                                                                                                                                                                                                                                                                                                                                                                                                                                                                                                                                                                                                                                                                                                                                                                                                                                                                                                                                                                                                                                                                                                                                                                                                                                                                                                                                                                                                                                                                                                                                                                                                                                                                                                                                                                                                                                                                                                    |                                       |                      |                     |                   |                                   |        |                                   |                                                       |  |  |  |  |  |  |              |   |     |   |     |      |                    |              |    |     |    |     |       |                   |              |    |     |    |     |       |                   |                          |  |            |  |            |               |                          |              |    |  |    |  |  |  |                                                                                                          |  |  |  |  |  |  |                                              |  |  |  |  |  |  |                                                          |  |  |  |  |  |  |             |    |     |   |    |        |                   |                          |  |            |  |           |               |                          |              |    |  |   |  |  |  |                               |  |  |  |  |  |  |                                              |  |  |  |  |  |  |                                                                                                |  |  |  |  |  |  |                                  |                                                                                                                                                                                                                                                                                                                 |
| Test for overall effect: Z = 1.07 (P = 0.28)                                                                                                                |                                                                                                                                                                                                                                                                                                                                                                                                                                                                                                                                                                                                                                                                                                                                                                                                                                                                                                                                                                                                                                                                                                                                                                                                                                                                                                                                                                                                                                                                                                                                                                                                                                                                                                                                                                                                                                                                                                                                                                                                                                                                                                                                                                                                                                                                                                                                                                    |                                       |                      |                     |                   |                                   |        |                                   |                                                       |  |  |  |  |  |  |              |   |     |   |     |      |                    |              |    |     |    |     |       |                   |              |    |     |    |     |       |                   |                          |  |            |  |            |               |                          |              |    |  |    |  |  |  |                                                                                                          |  |  |  |  |  |  |                                              |  |  |  |  |  |  |                                                          |  |  |  |  |  |  |             |    |     |   |    |        |                   |                          |  |            |  |           |               |                          |              |    |  |   |  |  |  |                               |  |  |  |  |  |  |                                              |  |  |  |  |  |  |                                                                                                |  |  |  |  |  |  |                                  |                                                                                                                                                                                                                                                                                                                 |
| <b>7.7.2 Unspecified baseline blood eosinophil count</b>                                                                                                    |                                                                                                                                                                                                                                                                                                                                                                                                                                                                                                                                                                                                                                                                                                                                                                                                                                                                                                                                                                                                                                                                                                                                                                                                                                                                                                                                                                                                                                                                                                                                                                                                                                                                                                                                                                                                                                                                                                                                                                                                                                                                                                                                                                                                                                                                                                                                                                    |                                       |                      |                     |                   |                                   |        |                                   |                                                       |  |  |  |  |  |  |              |   |     |   |     |      |                    |              |    |     |    |     |       |                   |              |    |     |    |     |       |                   |                          |  |            |  |            |               |                          |              |    |  |    |  |  |  |                                                                                                          |  |  |  |  |  |  |                                              |  |  |  |  |  |  |                                                          |  |  |  |  |  |  |             |    |     |   |    |        |                   |                          |  |            |  |           |               |                          |              |    |  |   |  |  |  |                               |  |  |  |  |  |  |                                              |  |  |  |  |  |  |                                                                                                |  |  |  |  |  |  |                                  |                                                                                                                                                                                                                                                                                                                 |
| Corren 2016                                                                                                                                                 | 16                                                                                                                                                                                                                                                                                                                                                                                                                                                                                                                                                                                                                                                                                                                                                                                                                                                                                                                                                                                                                                                                                                                                                                                                                                                                                                                                                                                                                                                                                                                                                                                                                                                                                                                                                                                                                                                                                                                                                                                                                                                                                                                                                                                                                                                                                                                                                                 | 395                                   | 4                    | 97                  | 100.0%            | 0.98 [0.34, 2.87]                 |        |                                   |                                                       |  |  |  |  |  |  |              |   |     |   |     |      |                    |              |    |     |    |     |       |                   |              |    |     |    |     |       |                   |                          |  |            |  |            |               |                          |              |    |  |    |  |  |  |                                                                                                          |  |  |  |  |  |  |                                              |  |  |  |  |  |  |                                                          |  |  |  |  |  |  |             |    |     |   |    |        |                   |                          |  |            |  |           |               |                          |              |    |  |   |  |  |  |                               |  |  |  |  |  |  |                                              |  |  |  |  |  |  |                                                                                                |  |  |  |  |  |  |                                  |                                                                                                                                                                                                                                                                                                                 |
| <b>Subtotal (95% CI)</b>                                                                                                                                    |                                                                                                                                                                                                                                                                                                                                                                                                                                                                                                                                                                                                                                                                                                                                                                                                                                                                                                                                                                                                                                                                                                                                                                                                                                                                                                                                                                                                                                                                                                                                                                                                                                                                                                                                                                                                                                                                                                                                                                                                                                                                                                                                                                                                                                                                                                                                                                    | <b>395</b>                            |                      | <b>97</b>           | <b>100.0%</b>     | <b>0.98 [0.34, 2.87]</b>          |        |                                   |                                                       |  |  |  |  |  |  |              |   |     |   |     |      |                    |              |    |     |    |     |       |                   |              |    |     |    |     |       |                   |                          |  |            |  |            |               |                          |              |    |  |    |  |  |  |                                                                                                          |  |  |  |  |  |  |                                              |  |  |  |  |  |  |                                                          |  |  |  |  |  |  |             |    |     |   |    |        |                   |                          |  |            |  |           |               |                          |              |    |  |   |  |  |  |                               |  |  |  |  |  |  |                                              |  |  |  |  |  |  |                                                                                                |  |  |  |  |  |  |                                  |                                                                                                                                                                                                                                                                                                                 |
| Total events                                                                                                                                                | 16                                                                                                                                                                                                                                                                                                                                                                                                                                                                                                                                                                                                                                                                                                                                                                                                                                                                                                                                                                                                                                                                                                                                                                                                                                                                                                                                                                                                                                                                                                                                                                                                                                                                                                                                                                                                                                                                                                                                                                                                                                                                                                                                                                                                                                                                                                                                                                 |                                       | 4                    |                     |                   |                                   |        |                                   |                                                       |  |  |  |  |  |  |              |   |     |   |     |      |                    |              |    |     |    |     |       |                   |              |    |     |    |     |       |                   |                          |  |            |  |            |               |                          |              |    |  |    |  |  |  |                                                                                                          |  |  |  |  |  |  |                                              |  |  |  |  |  |  |                                                          |  |  |  |  |  |  |             |    |     |   |    |        |                   |                          |  |            |  |           |               |                          |              |    |  |   |  |  |  |                               |  |  |  |  |  |  |                                              |  |  |  |  |  |  |                                                                                                |  |  |  |  |  |  |                                  |                                                                                                                                                                                                                                                                                                                 |
| Heterogeneity: Not applicable                                                                                                                               |                                                                                                                                                                                                                                                                                                                                                                                                                                                                                                                                                                                                                                                                                                                                                                                                                                                                                                                                                                                                                                                                                                                                                                                                                                                                                                                                                                                                                                                                                                                                                                                                                                                                                                                                                                                                                                                                                                                                                                                                                                                                                                                                                                                                                                                                                                                                                                    |                                       |                      |                     |                   |                                   |        |                                   |                                                       |  |  |  |  |  |  |              |   |     |   |     |      |                    |              |    |     |    |     |       |                   |              |    |     |    |     |       |                   |                          |  |            |  |            |               |                          |              |    |  |    |  |  |  |                                                                                                          |  |  |  |  |  |  |                                              |  |  |  |  |  |  |                                                          |  |  |  |  |  |  |             |    |     |   |    |        |                   |                          |  |            |  |           |               |                          |              |    |  |   |  |  |  |                               |  |  |  |  |  |  |                                              |  |  |  |  |  |  |                                                                                                |  |  |  |  |  |  |                                  |                                                                                                                                                                                                                                                                                                                 |
| Test for overall effect: Z = 0.03 (P = 0.97)                                                                                                                |                                                                                                                                                                                                                                                                                                                                                                                                                                                                                                                                                                                                                                                                                                                                                                                                                                                                                                                                                                                                                                                                                                                                                                                                                                                                                                                                                                                                                                                                                                                                                                                                                                                                                                                                                                                                                                                                                                                                                                                                                                                                                                                                                                                                                                                                                                                                                                    |                                       |                      |                     |                   |                                   |        |                                   |                                                       |  |  |  |  |  |  |              |   |     |   |     |      |                    |              |    |     |    |     |       |                   |              |    |     |    |     |       |                   |                          |  |            |  |            |               |                          |              |    |  |    |  |  |  |                                                                                                          |  |  |  |  |  |  |                                              |  |  |  |  |  |  |                                                          |  |  |  |  |  |  |             |    |     |   |    |        |                   |                          |  |            |  |           |               |                          |              |    |  |   |  |  |  |                               |  |  |  |  |  |  |                                              |  |  |  |  |  |  |                                                                                                |  |  |  |  |  |  |                                  |                                                                                                                                                                                                                                                                                                                 |
| Test for subgroup differences: Chi <sup>2</sup> = 0.14, df = 1 (P = 0.71), I <sup>2</sup> = 0%                                                              |                                                                                                                                                                                                                                                                                                                                                                                                                                                                                                                                                                                                                                                                                                                                                                                                                                                                                                                                                                                                                                                                                                                                                                                                                                                                                                                                                                                                                                                                                                                                                                                                                                                                                                                                                                                                                                                                                                                                                                                                                                                                                                                                                                                                                                                                                                                                                                    |                                       |                      |                     |                   |                                   |        |                                   |                                                       |  |  |  |  |  |  |              |   |     |   |     |      |                    |              |    |     |    |     |       |                   |              |    |     |    |     |       |                   |                          |  |            |  |            |               |                          |              |    |  |    |  |  |  |                                                                                                          |  |  |  |  |  |  |                                              |  |  |  |  |  |  |                                                          |  |  |  |  |  |  |             |    |     |   |    |        |                   |                          |  |            |  |           |               |                          |              |    |  |   |  |  |  |                               |  |  |  |  |  |  |                                              |  |  |  |  |  |  |                                                                                                |  |  |  |  |  |  |                                  |                                                                                                                                                                                                                                                                                                                 |

CI: Confidence interval; MD: Mean difference; RR: Risk ratio

#### GRADE Working Group grades of evidence

**High certainty:** We are very confident that the true effect lies close to that of the estimate of the effect

**Moderate certainty:** We are moderately confident in the effect estimate: The true effect is likely to be close to the estimate of the effect, but there is a possibility that it is substantially different

**Low certainty:** Our confidence in the effect estimate is limited: The true effect may be substantially different from the estimate of the effect

**Very low certainty:** We have very little confidence in the effect estimate: The true effect is likely to be substantially different from the estimate of effect

#### Explanations

a. All studies included a mixed population of patients with moderate and severe asthma.

- b. Potential risk of bias associated with selective outcome reporting bias (post hoc subgroup analysis).
- c. For both subgroups the ends of the 95% confidence interval include appreciable clinical benefit (MCID 0.5) and no benefit and could lead to opposite clinical decisions. Results from single study with only 106 patients.
- d. For both subgroups the ends of the 95% confidence interval include appreciable clinical benefit (MCID 0.23 L) and no benefit and could lead to opposite clinical decisions. Results from single study with only 104 patients.
- e. The trial by Corren 2016, which provided results for the subgroup "Unspecified baseline blood eosinophil counts" reported that eosinophils  $\geq 400$  cells/ $\mu$ L were observed in 20% of patients at baseline, distributed similarly between treatment groups.
- f. There was a high incidence of adverse events in both reslizumab and placebo groups. The apparent benefit from reslizumab might be explained by a reduction of asthma-related adverse events with the active drug.
- g. This judgement was based on an arbitrary clinical decision threshold of 15% increase or decrease in absolute effect in the subgroup with unspecified baseline blood eosinophil counts.
- h. This judgement was based on an arbitrary clinical decision threshold of 10% increase or decrease in absolute effect.

## References

1. Corren J, Weinstein S, Janka L, Zangrilli J, Garin M. Phase 3 Study of Reslizumab in Patients With Poorly Controlled Asthma: Effects Across a Broad Range of Eosinophil Counts. *Chest* 2016; 150: 799-810.
2. Castro M, Zangrilli J, Wechsler ME, et al. Reslizumab for inadequately controlled asthma with elevated blood eosinophil counts: results from two multicentre, parallel, double-blind, randomised, placebo-controlled, phase 3 trials. *Lancet Respir Med* 2015; 3: 355-366.
3. Bjermer L, Lemiere C, Maspero J, Weiss S, Zangrilli J, Germinaro M. Reslizumab for Inadequately Controlled Asthma With Elevated Blood Eosinophil Levels: A Randomized Phase 3 Study. *Chest* 2016; 150: 789-798.
4. Castro M, Mathur S, Hargreave F, et al. Reslizumab for poorly controlled, eosinophilic asthma: a randomized, placebo-controlled study. *Am J Respir Crit Care Med* 2011; 184: 1125-1132.
5. Chung KF, Wenzel SE, Brozek JL, et al. International ERS/ATS guidelines on definition, evaluation and treatment of severe asthma. *Eur Respir J* 2014; 43: 343-373.
6. Santanello NC, Zhang J, Seidenberg B, Reiss TF, Barber BL. What are minimal important changes for asthma measures in a clinical trial? *Eur Respir J* 1999; 14: 23-27.

**GRADE Evidence Profile: RESLIZUMAB (according to baseline sputum eosinophils - %)**

| Outcome<br>№ of participants<br>(studies)                                                                                                                                                                                                                                                                                                                                                                                           | Relative effect<br>(95% CI)                                                                                                                                                                                                                                                                                                           | Anticipated absolute effects (95% CI)                                                                                                                                                                                                                                                                                                                                                                                                                                                                                                                                                                                                                                                                                                                                                                                                                                                                                                                                                                                                                                                                                                                                                                                                                                                                                                                                                                                                                                                                                                                                                                                                    |                  |               | Certainty         | What happens                      |    |                  |               |        |                                   |                                        |  |  |  |  |  |  |             |       |        |    |    |        |                     |                   |  |  |    |    |        |                     |                               |  |  |  |  |  |  |                                              |  |  |  |  |  |  |                                        |  |  |  |  |  |  |             |       |        |    |    |        |                     |                   |  |  |    |    |        |                     |                               |  |  |  |  |  |  |                                              |  |  |  |  |  |  |                                    |                                                                                                                                                                                                                                                                             |
|-------------------------------------------------------------------------------------------------------------------------------------------------------------------------------------------------------------------------------------------------------------------------------------------------------------------------------------------------------------------------------------------------------------------------------------|---------------------------------------------------------------------------------------------------------------------------------------------------------------------------------------------------------------------------------------------------------------------------------------------------------------------------------------|------------------------------------------------------------------------------------------------------------------------------------------------------------------------------------------------------------------------------------------------------------------------------------------------------------------------------------------------------------------------------------------------------------------------------------------------------------------------------------------------------------------------------------------------------------------------------------------------------------------------------------------------------------------------------------------------------------------------------------------------------------------------------------------------------------------------------------------------------------------------------------------------------------------------------------------------------------------------------------------------------------------------------------------------------------------------------------------------------------------------------------------------------------------------------------------------------------------------------------------------------------------------------------------------------------------------------------------------------------------------------------------------------------------------------------------------------------------------------------------------------------------------------------------------------------------------------------------------------------------------------------------|------------------|---------------|-------------------|-----------------------------------|----|------------------|---------------|--------|-----------------------------------|----------------------------------------|--|--|--|--|--|--|-------------|-------|--------|----|----|--------|---------------------|-------------------|--|--|----|----|--------|---------------------|-------------------------------|--|--|--|--|--|--|----------------------------------------------|--|--|--|--|--|--|----------------------------------------|--|--|--|--|--|--|-------------|-------|--------|----|----|--------|---------------------|-------------------|--|--|----|----|--------|---------------------|-------------------------------|--|--|--|--|--|--|----------------------------------------------|--|--|--|--|--|--|------------------------------------|-----------------------------------------------------------------------------------------------------------------------------------------------------------------------------------------------------------------------------------------------------------------------------|
|                                                                                                                                                                                                                                                                                                                                                                                                                                     |                                                                                                                                                                                                                                                                                                                                       |                                                                                                                                                                                                                                                                                                                                                                                                                                                                                                                                                                                                                                                                                                                                                                                                                                                                                                                                                                                                                                                                                                                                                                                                                                                                                                                                                                                                                                                                                                                                                                                                                                          |                  | Difference    |                   |                                   |    |                  |               |        |                                   |                                        |  |  |  |  |  |  |             |       |        |    |    |        |                     |                   |  |  |    |    |        |                     |                               |  |  |  |  |  |  |                                              |  |  |  |  |  |  |                                        |  |  |  |  |  |  |             |       |        |    |    |        |                     |                   |  |  |    |    |        |                     |                               |  |  |  |  |  |  |                                              |  |  |  |  |  |  |                                    |                                                                                                                                                                                                                                                                             |
| <b>Asthma control (change from baseline)</b><br>assessed with: Asthma Control Questionnaire (ACQ-7);<br>Scale from: 0 to 6; lower values indicate better asthma control; MCID 0.5<br>follow up: 15 weeks<br>№ of participants: 105<br>(1 RCT) <sup>1</sup><br><u>Study participants meet criteria for the diagnosis of severe asthma defined by the ERS/ATS Guidelines on Severe Asthma<sup>3</sup></u><br><br>Importance: CRITICAL | Mean change from baseline in ACQ-7 score in patients treated with reslizumab compared to placebo were: sputum eosinophils <10%: Mean difference (95% CI) = -0.28 (-0.90 to 0.34), n=52; sputum eosinophils ≥10%: Mean difference (95% CI) = -0.42 (-0.91 to 0.07), n=53. Test for subgroup differences, p=0.73.                       | 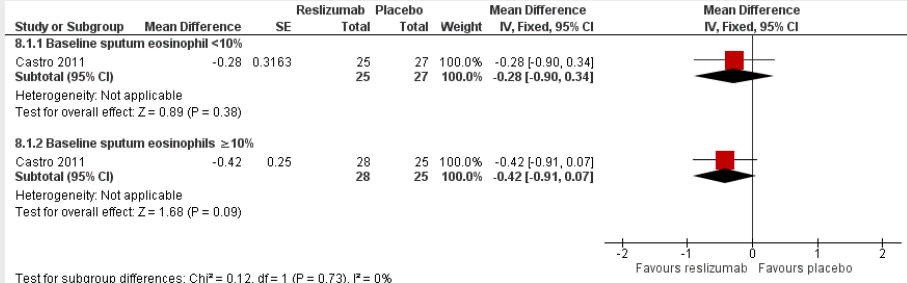 <table border="1"> <thead> <tr> <th>Study or Subgroup</th><th>Mean Difference</th><th>SE</th><th>Reslizumab Total</th><th>Placebo Total</th><th>Weight</th><th>Mean Difference IV, Fixed, 95% CI</th></tr> </thead> <tbody> <tr> <td>8.1.1 Baseline sputum eosinophil &lt;10%</td><td></td><td></td><td></td><td></td><td></td><td></td></tr> <tr> <td>Castro 2011</td><td>-0.28</td><td>0.3163</td><td>25</td><td>27</td><td>100.0%</td><td>-0.28 [-0.90, 0.34]</td></tr> <tr> <td>Subtotal (95% CI)</td><td></td><td></td><td>25</td><td>27</td><td>100.0%</td><td>-0.28 [-0.90, 0.34]</td></tr> <tr> <td>Heterogeneity: Not applicable</td><td></td><td></td><td></td><td></td><td></td><td></td></tr> <tr> <td>Test for overall effect: Z = 0.89 (P = 0.38)</td><td></td><td></td><td></td><td></td><td></td><td></td></tr> <tr> <td>8.1.2 Baseline sputum eosinophils ≥10%</td><td></td><td></td><td></td><td></td><td></td><td></td></tr> <tr> <td>Castro 2011</td><td>-0.42</td><td>0.25</td><td>28</td><td>25</td><td>100.0%</td><td>-0.42 [-0.91, 0.07]</td></tr> <tr> <td>Subtotal (95% CI)</td><td></td><td></td><td>28</td><td>25</td><td>100.0%</td><td>-0.42 [-0.91, 0.07]</td></tr> <tr> <td>Heterogeneity: Not applicable</td><td></td><td></td><td></td><td></td><td></td><td></td></tr> <tr> <td>Test for overall effect: Z = 1.68 (P = 0.09)</td><td></td><td></td><td></td><td></td><td></td><td></td></tr> </tbody> </table> <p>Test for subgroup differences: Chi<sup>2</sup> = 0.12, df = 1 (P = 0.73), I<sup>2</sup> = 0%</p> |                  |               | Study or Subgroup | Mean Difference                   | SE | Reslizumab Total | Placebo Total | Weight | Mean Difference IV, Fixed, 95% CI | 8.1.1 Baseline sputum eosinophil <10%  |  |  |  |  |  |  | Castro 2011 | -0.28 | 0.3163 | 25 | 27 | 100.0% | -0.28 [-0.90, 0.34] | Subtotal (95% CI) |  |  | 25 | 27 | 100.0% | -0.28 [-0.90, 0.34] | Heterogeneity: Not applicable |  |  |  |  |  |  | Test for overall effect: Z = 0.89 (P = 0.38) |  |  |  |  |  |  | 8.1.2 Baseline sputum eosinophils ≥10% |  |  |  |  |  |  | Castro 2011 | -0.42 | 0.25   | 28 | 25 | 100.0% | -0.42 [-0.91, 0.07] | Subtotal (95% CI) |  |  | 28 | 25 | 100.0% | -0.42 [-0.91, 0.07] | Heterogeneity: Not applicable |  |  |  |  |  |  | Test for overall effect: Z = 1.68 (P = 0.09) |  |  |  |  |  |  | ⊕○○○<br>VERY<br>LOW <sup>a,b</sup> | There are no significant improvements in asthma control assessed by the ACQ-7 with reslizumab compared to placebo in patients with baseline sputum eosinophils <10% or ≥10%. There are no statistically significant differences between subgroups.                          |
| Study or Subgroup                                                                                                                                                                                                                                                                                                                                                                                                                   | Mean Difference                                                                                                                                                                                                                                                                                                                       | SE                                                                                                                                                                                                                                                                                                                                                                                                                                                                                                                                                                                                                                                                                                                                                                                                                                                                                                                                                                                                                                                                                                                                                                                                                                                                                                                                                                                                                                                                                                                                                                                                                                       | Reslizumab Total | Placebo Total | Weight            | Mean Difference IV, Fixed, 95% CI |    |                  |               |        |                                   |                                        |  |  |  |  |  |  |             |       |        |    |    |        |                     |                   |  |  |    |    |        |                     |                               |  |  |  |  |  |  |                                              |  |  |  |  |  |  |                                        |  |  |  |  |  |  |             |       |        |    |    |        |                     |                   |  |  |    |    |        |                     |                               |  |  |  |  |  |  |                                              |  |  |  |  |  |  |                                    |                                                                                                                                                                                                                                                                             |
| 8.1.1 Baseline sputum eosinophil <10%                                                                                                                                                                                                                                                                                                                                                                                               |                                                                                                                                                                                                                                                                                                                                       |                                                                                                                                                                                                                                                                                                                                                                                                                                                                                                                                                                                                                                                                                                                                                                                                                                                                                                                                                                                                                                                                                                                                                                                                                                                                                                                                                                                                                                                                                                                                                                                                                                          |                  |               |                   |                                   |    |                  |               |        |                                   |                                        |  |  |  |  |  |  |             |       |        |    |    |        |                     |                   |  |  |    |    |        |                     |                               |  |  |  |  |  |  |                                              |  |  |  |  |  |  |                                        |  |  |  |  |  |  |             |       |        |    |    |        |                     |                   |  |  |    |    |        |                     |                               |  |  |  |  |  |  |                                              |  |  |  |  |  |  |                                    |                                                                                                                                                                                                                                                                             |
| Castro 2011                                                                                                                                                                                                                                                                                                                                                                                                                         | -0.28                                                                                                                                                                                                                                                                                                                                 | 0.3163                                                                                                                                                                                                                                                                                                                                                                                                                                                                                                                                                                                                                                                                                                                                                                                                                                                                                                                                                                                                                                                                                                                                                                                                                                                                                                                                                                                                                                                                                                                                                                                                                                   | 25               | 27            | 100.0%            | -0.28 [-0.90, 0.34]               |    |                  |               |        |                                   |                                        |  |  |  |  |  |  |             |       |        |    |    |        |                     |                   |  |  |    |    |        |                     |                               |  |  |  |  |  |  |                                              |  |  |  |  |  |  |                                        |  |  |  |  |  |  |             |       |        |    |    |        |                     |                   |  |  |    |    |        |                     |                               |  |  |  |  |  |  |                                              |  |  |  |  |  |  |                                    |                                                                                                                                                                                                                                                                             |
| Subtotal (95% CI)                                                                                                                                                                                                                                                                                                                                                                                                                   |                                                                                                                                                                                                                                                                                                                                       |                                                                                                                                                                                                                                                                                                                                                                                                                                                                                                                                                                                                                                                                                                                                                                                                                                                                                                                                                                                                                                                                                                                                                                                                                                                                                                                                                                                                                                                                                                                                                                                                                                          | 25               | 27            | 100.0%            | -0.28 [-0.90, 0.34]               |    |                  |               |        |                                   |                                        |  |  |  |  |  |  |             |       |        |    |    |        |                     |                   |  |  |    |    |        |                     |                               |  |  |  |  |  |  |                                              |  |  |  |  |  |  |                                        |  |  |  |  |  |  |             |       |        |    |    |        |                     |                   |  |  |    |    |        |                     |                               |  |  |  |  |  |  |                                              |  |  |  |  |  |  |                                    |                                                                                                                                                                                                                                                                             |
| Heterogeneity: Not applicable                                                                                                                                                                                                                                                                                                                                                                                                       |                                                                                                                                                                                                                                                                                                                                       |                                                                                                                                                                                                                                                                                                                                                                                                                                                                                                                                                                                                                                                                                                                                                                                                                                                                                                                                                                                                                                                                                                                                                                                                                                                                                                                                                                                                                                                                                                                                                                                                                                          |                  |               |                   |                                   |    |                  |               |        |                                   |                                        |  |  |  |  |  |  |             |       |        |    |    |        |                     |                   |  |  |    |    |        |                     |                               |  |  |  |  |  |  |                                              |  |  |  |  |  |  |                                        |  |  |  |  |  |  |             |       |        |    |    |        |                     |                   |  |  |    |    |        |                     |                               |  |  |  |  |  |  |                                              |  |  |  |  |  |  |                                    |                                                                                                                                                                                                                                                                             |
| Test for overall effect: Z = 0.89 (P = 0.38)                                                                                                                                                                                                                                                                                                                                                                                        |                                                                                                                                                                                                                                                                                                                                       |                                                                                                                                                                                                                                                                                                                                                                                                                                                                                                                                                                                                                                                                                                                                                                                                                                                                                                                                                                                                                                                                                                                                                                                                                                                                                                                                                                                                                                                                                                                                                                                                                                          |                  |               |                   |                                   |    |                  |               |        |                                   |                                        |  |  |  |  |  |  |             |       |        |    |    |        |                     |                   |  |  |    |    |        |                     |                               |  |  |  |  |  |  |                                              |  |  |  |  |  |  |                                        |  |  |  |  |  |  |             |       |        |    |    |        |                     |                   |  |  |    |    |        |                     |                               |  |  |  |  |  |  |                                              |  |  |  |  |  |  |                                    |                                                                                                                                                                                                                                                                             |
| 8.1.2 Baseline sputum eosinophils ≥10%                                                                                                                                                                                                                                                                                                                                                                                              |                                                                                                                                                                                                                                                                                                                                       |                                                                                                                                                                                                                                                                                                                                                                                                                                                                                                                                                                                                                                                                                                                                                                                                                                                                                                                                                                                                                                                                                                                                                                                                                                                                                                                                                                                                                                                                                                                                                                                                                                          |                  |               |                   |                                   |    |                  |               |        |                                   |                                        |  |  |  |  |  |  |             |       |        |    |    |        |                     |                   |  |  |    |    |        |                     |                               |  |  |  |  |  |  |                                              |  |  |  |  |  |  |                                        |  |  |  |  |  |  |             |       |        |    |    |        |                     |                   |  |  |    |    |        |                     |                               |  |  |  |  |  |  |                                              |  |  |  |  |  |  |                                    |                                                                                                                                                                                                                                                                             |
| Castro 2011                                                                                                                                                                                                                                                                                                                                                                                                                         | -0.42                                                                                                                                                                                                                                                                                                                                 | 0.25                                                                                                                                                                                                                                                                                                                                                                                                                                                                                                                                                                                                                                                                                                                                                                                                                                                                                                                                                                                                                                                                                                                                                                                                                                                                                                                                                                                                                                                                                                                                                                                                                                     | 28               | 25            | 100.0%            | -0.42 [-0.91, 0.07]               |    |                  |               |        |                                   |                                        |  |  |  |  |  |  |             |       |        |    |    |        |                     |                   |  |  |    |    |        |                     |                               |  |  |  |  |  |  |                                              |  |  |  |  |  |  |                                        |  |  |  |  |  |  |             |       |        |    |    |        |                     |                   |  |  |    |    |        |                     |                               |  |  |  |  |  |  |                                              |  |  |  |  |  |  |                                    |                                                                                                                                                                                                                                                                             |
| Subtotal (95% CI)                                                                                                                                                                                                                                                                                                                                                                                                                   |                                                                                                                                                                                                                                                                                                                                       |                                                                                                                                                                                                                                                                                                                                                                                                                                                                                                                                                                                                                                                                                                                                                                                                                                                                                                                                                                                                                                                                                                                                                                                                                                                                                                                                                                                                                                                                                                                                                                                                                                          | 28               | 25            | 100.0%            | -0.42 [-0.91, 0.07]               |    |                  |               |        |                                   |                                        |  |  |  |  |  |  |             |       |        |    |    |        |                     |                   |  |  |    |    |        |                     |                               |  |  |  |  |  |  |                                              |  |  |  |  |  |  |                                        |  |  |  |  |  |  |             |       |        |    |    |        |                     |                   |  |  |    |    |        |                     |                               |  |  |  |  |  |  |                                              |  |  |  |  |  |  |                                    |                                                                                                                                                                                                                                                                             |
| Heterogeneity: Not applicable                                                                                                                                                                                                                                                                                                                                                                                                       |                                                                                                                                                                                                                                                                                                                                       |                                                                                                                                                                                                                                                                                                                                                                                                                                                                                                                                                                                                                                                                                                                                                                                                                                                                                                                                                                                                                                                                                                                                                                                                                                                                                                                                                                                                                                                                                                                                                                                                                                          |                  |               |                   |                                   |    |                  |               |        |                                   |                                        |  |  |  |  |  |  |             |       |        |    |    |        |                     |                   |  |  |    |    |        |                     |                               |  |  |  |  |  |  |                                              |  |  |  |  |  |  |                                        |  |  |  |  |  |  |             |       |        |    |    |        |                     |                   |  |  |    |    |        |                     |                               |  |  |  |  |  |  |                                              |  |  |  |  |  |  |                                    |                                                                                                                                                                                                                                                                             |
| Test for overall effect: Z = 1.68 (P = 0.09)                                                                                                                                                                                                                                                                                                                                                                                        |                                                                                                                                                                                                                                                                                                                                       |                                                                                                                                                                                                                                                                                                                                                                                                                                                                                                                                                                                                                                                                                                                                                                                                                                                                                                                                                                                                                                                                                                                                                                                                                                                                                                                                                                                                                                                                                                                                                                                                                                          |                  |               |                   |                                   |    |                  |               |        |                                   |                                        |  |  |  |  |  |  |             |       |        |    |    |        |                     |                   |  |  |    |    |        |                     |                               |  |  |  |  |  |  |                                              |  |  |  |  |  |  |                                        |  |  |  |  |  |  |             |       |        |    |    |        |                     |                   |  |  |    |    |        |                     |                               |  |  |  |  |  |  |                                              |  |  |  |  |  |  |                                    |                                                                                                                                                                                                                                                                             |
| <b>Lung function (Pre-bronchodilator FEV1 litres)</b><br>follow up: 15 weeks<br>MCID 0.23 litre <sup>2</sup><br>№ of participants: 103<br>(1 RCT) <sup>1</sup><br><u>Study participants meet criteria for the diagnosis of severe asthma defined by the ERS/ATS Guidelines on Severe Asthma<sup>3</sup></u><br><br>Importance: IMPORTANT                                                                                            | Mean change from baseline in pre-bronchodilator FEV1 (litres) in patients treated with reslizumab compared to placebo were: sputum eosinophils <10%: Mean difference (95% CI) = 0.25 L (0.04 to 0.46 L), n=50; sputum eosinophils ≥10%: Mean difference (95% CI) = 0.22 L (0 to 0.44 L), n=53. Test for subgroup differences, p=0.85. |  <table border="1"> <thead> <tr> <th>Study or Subgroup</th><th>Mean Difference</th><th>SE</th><th>Reslizumab Total</th><th>Placebo Total</th><th>Weight</th><th>Mean Difference IV, Fixed, 95% CI</th></tr> </thead> <tbody> <tr> <td>8.2.1 Baseline sputum eosinophils &lt;10%</td><td></td><td></td><td></td><td></td><td></td><td></td></tr> <tr> <td>Castro 2011</td><td>0.25</td><td>0.1071</td><td>24</td><td>26</td><td>100.0%</td><td>0.25 [0.04, 0.46]</td></tr> <tr> <td>Subtotal (95% CI)</td><td></td><td></td><td>24</td><td>26</td><td>100.0%</td><td>0.25 [0.04, 0.46]</td></tr> <tr> <td>Heterogeneity: Not applicable</td><td></td><td></td><td></td><td></td><td></td><td></td></tr> <tr> <td>Test for overall effect: Z = 2.33 (P = 0.02)</td><td></td><td></td><td></td><td></td><td></td><td></td></tr> <tr> <td>8.2.2 Baseline sputum eosinophils ≥10%</td><td></td><td></td><td></td><td></td><td></td><td></td></tr> <tr> <td>Castro 2011</td><td>0.22</td><td>0.1122</td><td>28</td><td>25</td><td>100.0%</td><td>0.22 [0.00, 0.44]</td></tr> <tr> <td>Subtotal (95% CI)</td><td></td><td></td><td>28</td><td>25</td><td>100.0%</td><td>0.22 [0.00, 0.44]</td></tr> <tr> <td>Heterogeneity: Not applicable</td><td></td><td></td><td></td><td></td><td></td><td></td></tr> <tr> <td>Test for overall effect: Z = 1.96 (P = 0.05)</td><td></td><td></td><td></td><td></td><td></td><td></td></tr> </tbody> </table> <p>Test for subgroup differences: Chi<sup>2</sup> = 0.04, df = 1 (P = 0.85), I<sup>2</sup> = 0%</p>       |                  |               | Study or Subgroup | Mean Difference                   | SE | Reslizumab Total | Placebo Total | Weight | Mean Difference IV, Fixed, 95% CI | 8.2.1 Baseline sputum eosinophils <10% |  |  |  |  |  |  | Castro 2011 | 0.25  | 0.1071 | 24 | 26 | 100.0% | 0.25 [0.04, 0.46]   | Subtotal (95% CI) |  |  | 24 | 26 | 100.0% | 0.25 [0.04, 0.46]   | Heterogeneity: Not applicable |  |  |  |  |  |  | Test for overall effect: Z = 2.33 (P = 0.02) |  |  |  |  |  |  | 8.2.2 Baseline sputum eosinophils ≥10% |  |  |  |  |  |  | Castro 2011 | 0.22  | 0.1122 | 28 | 25 | 100.0% | 0.22 [0.00, 0.44]   | Subtotal (95% CI) |  |  | 28 | 25 | 100.0% | 0.22 [0.00, 0.44]   | Heterogeneity: Not applicable |  |  |  |  |  |  | Test for overall effect: Z = 1.96 (P = 0.05) |  |  |  |  |  |  | ⊕○○○<br>VERY<br>LOW <sup>a,c</sup> | There is a significant increase in pre-BD FEV1 (litres) with reslizumab compared to placebo in the subgroup of patients with sputum eosinophils <10% but not in patient with ≥10% sputum eosinophils. There are no statistically significant differences between subgroups. |
| Study or Subgroup                                                                                                                                                                                                                                                                                                                                                                                                                   | Mean Difference                                                                                                                                                                                                                                                                                                                       | SE                                                                                                                                                                                                                                                                                                                                                                                                                                                                                                                                                                                                                                                                                                                                                                                                                                                                                                                                                                                                                                                                                                                                                                                                                                                                                                                                                                                                                                                                                                                                                                                                                                       | Reslizumab Total | Placebo Total | Weight            | Mean Difference IV, Fixed, 95% CI |    |                  |               |        |                                   |                                        |  |  |  |  |  |  |             |       |        |    |    |        |                     |                   |  |  |    |    |        |                     |                               |  |  |  |  |  |  |                                              |  |  |  |  |  |  |                                        |  |  |  |  |  |  |             |       |        |    |    |        |                     |                   |  |  |    |    |        |                     |                               |  |  |  |  |  |  |                                              |  |  |  |  |  |  |                                    |                                                                                                                                                                                                                                                                             |
| 8.2.1 Baseline sputum eosinophils <10%                                                                                                                                                                                                                                                                                                                                                                                              |                                                                                                                                                                                                                                                                                                                                       |                                                                                                                                                                                                                                                                                                                                                                                                                                                                                                                                                                                                                                                                                                                                                                                                                                                                                                                                                                                                                                                                                                                                                                                                                                                                                                                                                                                                                                                                                                                                                                                                                                          |                  |               |                   |                                   |    |                  |               |        |                                   |                                        |  |  |  |  |  |  |             |       |        |    |    |        |                     |                   |  |  |    |    |        |                     |                               |  |  |  |  |  |  |                                              |  |  |  |  |  |  |                                        |  |  |  |  |  |  |             |       |        |    |    |        |                     |                   |  |  |    |    |        |                     |                               |  |  |  |  |  |  |                                              |  |  |  |  |  |  |                                    |                                                                                                                                                                                                                                                                             |
| Castro 2011                                                                                                                                                                                                                                                                                                                                                                                                                         | 0.25                                                                                                                                                                                                                                                                                                                                  | 0.1071                                                                                                                                                                                                                                                                                                                                                                                                                                                                                                                                                                                                                                                                                                                                                                                                                                                                                                                                                                                                                                                                                                                                                                                                                                                                                                                                                                                                                                                                                                                                                                                                                                   | 24               | 26            | 100.0%            | 0.25 [0.04, 0.46]                 |    |                  |               |        |                                   |                                        |  |  |  |  |  |  |             |       |        |    |    |        |                     |                   |  |  |    |    |        |                     |                               |  |  |  |  |  |  |                                              |  |  |  |  |  |  |                                        |  |  |  |  |  |  |             |       |        |    |    |        |                     |                   |  |  |    |    |        |                     |                               |  |  |  |  |  |  |                                              |  |  |  |  |  |  |                                    |                                                                                                                                                                                                                                                                             |
| Subtotal (95% CI)                                                                                                                                                                                                                                                                                                                                                                                                                   |                                                                                                                                                                                                                                                                                                                                       |                                                                                                                                                                                                                                                                                                                                                                                                                                                                                                                                                                                                                                                                                                                                                                                                                                                                                                                                                                                                                                                                                                                                                                                                                                                                                                                                                                                                                                                                                                                                                                                                                                          | 24               | 26            | 100.0%            | 0.25 [0.04, 0.46]                 |    |                  |               |        |                                   |                                        |  |  |  |  |  |  |             |       |        |    |    |        |                     |                   |  |  |    |    |        |                     |                               |  |  |  |  |  |  |                                              |  |  |  |  |  |  |                                        |  |  |  |  |  |  |             |       |        |    |    |        |                     |                   |  |  |    |    |        |                     |                               |  |  |  |  |  |  |                                              |  |  |  |  |  |  |                                    |                                                                                                                                                                                                                                                                             |
| Heterogeneity: Not applicable                                                                                                                                                                                                                                                                                                                                                                                                       |                                                                                                                                                                                                                                                                                                                                       |                                                                                                                                                                                                                                                                                                                                                                                                                                                                                                                                                                                                                                                                                                                                                                                                                                                                                                                                                                                                                                                                                                                                                                                                                                                                                                                                                                                                                                                                                                                                                                                                                                          |                  |               |                   |                                   |    |                  |               |        |                                   |                                        |  |  |  |  |  |  |             |       |        |    |    |        |                     |                   |  |  |    |    |        |                     |                               |  |  |  |  |  |  |                                              |  |  |  |  |  |  |                                        |  |  |  |  |  |  |             |       |        |    |    |        |                     |                   |  |  |    |    |        |                     |                               |  |  |  |  |  |  |                                              |  |  |  |  |  |  |                                    |                                                                                                                                                                                                                                                                             |
| Test for overall effect: Z = 2.33 (P = 0.02)                                                                                                                                                                                                                                                                                                                                                                                        |                                                                                                                                                                                                                                                                                                                                       |                                                                                                                                                                                                                                                                                                                                                                                                                                                                                                                                                                                                                                                                                                                                                                                                                                                                                                                                                                                                                                                                                                                                                                                                                                                                                                                                                                                                                                                                                                                                                                                                                                          |                  |               |                   |                                   |    |                  |               |        |                                   |                                        |  |  |  |  |  |  |             |       |        |    |    |        |                     |                   |  |  |    |    |        |                     |                               |  |  |  |  |  |  |                                              |  |  |  |  |  |  |                                        |  |  |  |  |  |  |             |       |        |    |    |        |                     |                   |  |  |    |    |        |                     |                               |  |  |  |  |  |  |                                              |  |  |  |  |  |  |                                    |                                                                                                                                                                                                                                                                             |
| 8.2.2 Baseline sputum eosinophils ≥10%                                                                                                                                                                                                                                                                                                                                                                                              |                                                                                                                                                                                                                                                                                                                                       |                                                                                                                                                                                                                                                                                                                                                                                                                                                                                                                                                                                                                                                                                                                                                                                                                                                                                                                                                                                                                                                                                                                                                                                                                                                                                                                                                                                                                                                                                                                                                                                                                                          |                  |               |                   |                                   |    |                  |               |        |                                   |                                        |  |  |  |  |  |  |             |       |        |    |    |        |                     |                   |  |  |    |    |        |                     |                               |  |  |  |  |  |  |                                              |  |  |  |  |  |  |                                        |  |  |  |  |  |  |             |       |        |    |    |        |                     |                   |  |  |    |    |        |                     |                               |  |  |  |  |  |  |                                              |  |  |  |  |  |  |                                    |                                                                                                                                                                                                                                                                             |
| Castro 2011                                                                                                                                                                                                                                                                                                                                                                                                                         | 0.22                                                                                                                                                                                                                                                                                                                                  | 0.1122                                                                                                                                                                                                                                                                                                                                                                                                                                                                                                                                                                                                                                                                                                                                                                                                                                                                                                                                                                                                                                                                                                                                                                                                                                                                                                                                                                                                                                                                                                                                                                                                                                   | 28               | 25            | 100.0%            | 0.22 [0.00, 0.44]                 |    |                  |               |        |                                   |                                        |  |  |  |  |  |  |             |       |        |    |    |        |                     |                   |  |  |    |    |        |                     |                               |  |  |  |  |  |  |                                              |  |  |  |  |  |  |                                        |  |  |  |  |  |  |             |       |        |    |    |        |                     |                   |  |  |    |    |        |                     |                               |  |  |  |  |  |  |                                              |  |  |  |  |  |  |                                    |                                                                                                                                                                                                                                                                             |
| Subtotal (95% CI)                                                                                                                                                                                                                                                                                                                                                                                                                   |                                                                                                                                                                                                                                                                                                                                       |                                                                                                                                                                                                                                                                                                                                                                                                                                                                                                                                                                                                                                                                                                                                                                                                                                                                                                                                                                                                                                                                                                                                                                                                                                                                                                                                                                                                                                                                                                                                                                                                                                          | 28               | 25            | 100.0%            | 0.22 [0.00, 0.44]                 |    |                  |               |        |                                   |                                        |  |  |  |  |  |  |             |       |        |    |    |        |                     |                   |  |  |    |    |        |                     |                               |  |  |  |  |  |  |                                              |  |  |  |  |  |  |                                        |  |  |  |  |  |  |             |       |        |    |    |        |                     |                   |  |  |    |    |        |                     |                               |  |  |  |  |  |  |                                              |  |  |  |  |  |  |                                    |                                                                                                                                                                                                                                                                             |
| Heterogeneity: Not applicable                                                                                                                                                                                                                                                                                                                                                                                                       |                                                                                                                                                                                                                                                                                                                                       |                                                                                                                                                                                                                                                                                                                                                                                                                                                                                                                                                                                                                                                                                                                                                                                                                                                                                                                                                                                                                                                                                                                                                                                                                                                                                                                                                                                                                                                                                                                                                                                                                                          |                  |               |                   |                                   |    |                  |               |        |                                   |                                        |  |  |  |  |  |  |             |       |        |    |    |        |                     |                   |  |  |    |    |        |                     |                               |  |  |  |  |  |  |                                              |  |  |  |  |  |  |                                        |  |  |  |  |  |  |             |       |        |    |    |        |                     |                   |  |  |    |    |        |                     |                               |  |  |  |  |  |  |                                              |  |  |  |  |  |  |                                    |                                                                                                                                                                                                                                                                             |
| Test for overall effect: Z = 1.96 (P = 0.05)                                                                                                                                                                                                                                                                                                                                                                                        |                                                                                                                                                                                                                                                                                                                                       |                                                                                                                                                                                                                                                                                                                                                                                                                                                                                                                                                                                                                                                                                                                                                                                                                                                                                                                                                                                                                                                                                                                                                                                                                                                                                                                                                                                                                                                                                                                                                                                                                                          |                  |               |                   |                                   |    |                  |               |        |                                   |                                        |  |  |  |  |  |  |             |       |        |    |    |        |                     |                   |  |  |    |    |        |                     |                               |  |  |  |  |  |  |                                              |  |  |  |  |  |  |                                        |  |  |  |  |  |  |             |       |        |    |    |        |                     |                   |  |  |    |    |        |                     |                               |  |  |  |  |  |  |                                              |  |  |  |  |  |  |                                    |                                                                                                                                                                                                                                                                             |

BD: bronchodilator; CI: Confidence interval; FEV1: forced expiratory volume in 1 second; MCID: minimal clinically important difference; MD: Mean difference; RCT: randomised controlled trial

| Outcome<br>No of participants<br>(studies) | Relative effect<br>(95% CI) | Anticipated absolute effects (95% CI) |  |            | Certainty | What happens |
|--------------------------------------------|-----------------------------|---------------------------------------|--|------------|-----------|--------------|
|                                            |                             |                                       |  | Difference |           |              |

#### GRADE Working Group grades of evidence

**High certainty:** We are very confident that the true effect lies close to that of the estimate of the effect

**Moderate certainty:** We are moderately confident in the effect estimate: The true effect is likely to be close to the estimate of the effect, but there is a possibility that it is substantially different

**Low certainty:** Our confidence in the effect estimate is limited: The true effect may be substantially different from the estimate of the effect

**Very low certainty:** We have very little confidence in the effect estimate: The true effect is likely to be substantially different from the estimate of effect

## Explanations

- Potential risk of bias associated with selective outcome reporting bias (post hoc subgroup analysis).
- For both subgroups the ends of the 95% confidence interval include appreciable clinical benefit (MCID 0.5) and no benefit and could lead to opposite clinical decisions. Results from single study with only 105 patients.
- For both subgroups the ends of the 95% confidence interval include appreciable clinical benefit (MCID 0.23 L) and no benefit and could lead to opposite clinical decisions. Results from single study with only 103 patients.

## References

- Castro M, Mathur S, Hargreave F, et al. Reslizumab for poorly controlled, eosinophilic asthma: a randomized, placebo-controlled study. *Am J Respir Crit Care Med* 2011; 184: 1125-1132.
- Santanello NC, Zhang J, Seidenberg B, Reiss TF, Barber BL. What are minimal important changes for asthma measures in a clinical trial? *Eur Respir J* 1999; 14: 23-27.
- Chung KF, Wenzel SE, Brozek JL, et al. International ERS/ATS guidelines on definition, evaluation and treatment of severe asthma. *Eur Respir J* 2014; 43: 343-373.

Should the level of eosinophils (in blood or sputum) be used to guide the initiation of a monoclonal anti-IL5 strategy in adults and children with severe asthma?

|                                                                                                                                                                                                                                                                                                                                                                                                                                                                                                                                                                                                                                                           |                                                                                                                                                                                                                                                                                                                                                                                                                                                                                                                                                                                                                                                                                                                                                                                                                                                                                                                                                                                        |
|-----------------------------------------------------------------------------------------------------------------------------------------------------------------------------------------------------------------------------------------------------------------------------------------------------------------------------------------------------------------------------------------------------------------------------------------------------------------------------------------------------------------------------------------------------------------------------------------------------------------------------------------------------------|----------------------------------------------------------------------------------------------------------------------------------------------------------------------------------------------------------------------------------------------------------------------------------------------------------------------------------------------------------------------------------------------------------------------------------------------------------------------------------------------------------------------------------------------------------------------------------------------------------------------------------------------------------------------------------------------------------------------------------------------------------------------------------------------------------------------------------------------------------------------------------------------------------------------------------------------------------------------------------------|
| <p><b>POPULATION:</b> Adults and children with severe asthma</p> <p><b>INTERVENTION:</b> Use of Eosinophil level in blood or sputum identify patients for therapy with an anti-interleukin 5 strategy (monoclonal antibodies directed against the interleukin 5 or its receptor)</p> <p><b>COMPARISON:</b> Treatment of all with anti-interleukin 5 strategy (monoclonal antibodies directed against the interleukin 5 or its receptor)</p> <p><b>MAIN OUTCOMES:</b></p> <ul style="list-style-type: none"> <li>Respiratory symptoms</li> <li>Lung function</li> <li>Exacerbation rate</li> <li>Adverse events</li> <li>Serious adverse events</li> </ul> | <p><b>BACKGROUND:</b> Patients with severe asthma are characterized by uncontrolled symptoms and signs despite treatment with high dose steroids and bronchodilators, or require these therapies to maintain control. IL-5 is the main cytokine involved in the activation of eosinophils which are a classic feature of atopic severe asthma. Monoclonal antibodies have been developed that bind the IL-5 cytokine or receptor. The three drugs in this category: mepolizumab, reslizumab and benralizumab have been shown to be efficacious in randomized controlled trials at improving outcomes. However, patients exposed to this therapy have variable therapeutic response to this class of drugs which may reflect differences in their underlying biology. This systematic review and meta-analysis investigates whether specific levels of eosinophilia in blood or sputum can be used as a biomarker to predict therapeutic response to monoclonal anti-IL5 therapies.</p> |
|-----------------------------------------------------------------------------------------------------------------------------------------------------------------------------------------------------------------------------------------------------------------------------------------------------------------------------------------------------------------------------------------------------------------------------------------------------------------------------------------------------------------------------------------------------------------------------------------------------------------------------------------------------------|----------------------------------------------------------------------------------------------------------------------------------------------------------------------------------------------------------------------------------------------------------------------------------------------------------------------------------------------------------------------------------------------------------------------------------------------------------------------------------------------------------------------------------------------------------------------------------------------------------------------------------------------------------------------------------------------------------------------------------------------------------------------------------------------------------------------------------------------------------------------------------------------------------------------------------------------------------------------------------------|

## Assessment

|                   | JUDGEMENT                                                                                                                                                                                                                      | RESEARCH EVIDENCE                                                                                                                                                                                                                                                                                                                                                                                                                                                                                                                                                                                                                                                                                                                                                                                                                                                                                                                                                                                                                                                                                                                                                                                                                                                                                                                                                                                                                                                                                                                                                                                                                                                                                                                                                                                                                                                                                                                                                                                                                                                                                                                                                                                                                                                                                                                                                                                                                               | ADDITIONAL CONSIDERATIONS                                                                                                                                                                                                                                                                                                                                                                                                                                                                                                                                 |
|-------------------|--------------------------------------------------------------------------------------------------------------------------------------------------------------------------------------------------------------------------------|-------------------------------------------------------------------------------------------------------------------------------------------------------------------------------------------------------------------------------------------------------------------------------------------------------------------------------------------------------------------------------------------------------------------------------------------------------------------------------------------------------------------------------------------------------------------------------------------------------------------------------------------------------------------------------------------------------------------------------------------------------------------------------------------------------------------------------------------------------------------------------------------------------------------------------------------------------------------------------------------------------------------------------------------------------------------------------------------------------------------------------------------------------------------------------------------------------------------------------------------------------------------------------------------------------------------------------------------------------------------------------------------------------------------------------------------------------------------------------------------------------------------------------------------------------------------------------------------------------------------------------------------------------------------------------------------------------------------------------------------------------------------------------------------------------------------------------------------------------------------------------------------------------------------------------------------------------------------------------------------------------------------------------------------------------------------------------------------------------------------------------------------------------------------------------------------------------------------------------------------------------------------------------------------------------------------------------------------------------------------------------------------------------------------------------------------------|-----------------------------------------------------------------------------------------------------------------------------------------------------------------------------------------------------------------------------------------------------------------------------------------------------------------------------------------------------------------------------------------------------------------------------------------------------------------------------------------------------------------------------------------------------------|
| DESIRABLE EFFECTS | <p><b>How substantial are the desirable anticipated effects?</b></p> <ul style="list-style-type: none"> <li>○ Trivial</li> <li>○ Small</li> <li>● Moderate</li> <li>○ Large</li> <li>○ Varies</li> <li>○ Don't know</li> </ul> | <p>Results from research evidence (studies)</p> <p>There were 13 RCT studies (PMID: 27056586; 27609408; 25306557; 25736990; 28395936; 27018175; 27609406; 28530840; 27177493; 27097165; 21852542) that performed either pre-specified or post hoc subgroup analyses evaluating different treatment responses based on baseline sputum or blood eosinophil levels. The results across anti-IL 5 medications and well as biomarker level and type varies substantially for outcomes.</p> <p>An important outcome for patients includes rate of exacerbation. Blood eosinophils were the most typically measured biomarker and was available for all the medications.</p> <p>In one study (PMID: 27177493), baseline serum eosinophils of <math>\geq 500/\mu\text{L}</math> were associated with a significantly greater response to therapy for mepolizumab only. For this outcome, there was a 73% reduction in exacerbations amongst those with a blood eosinophil level of <math>\geq 500/\mu\text{L}</math> compared to 36-39% non-statistically significant reduction in subgroups with eosinophil levels of 150 to <math>&lt;300</math> cells/<math>\mu\text{L}</math> and 300 to <math>&lt;500</math> cells/<math>\mu\text{L}</math>, respectively. Notably mepolizumab reduced exacerbation rates in all the subgroups defined by different baseline eosinophil thresholds (<math>\geq 150</math>, <math>\geq 300</math>, <math>\geq 400</math> and <math>\geq 500</math> cells/<math>\mu\text{L}</math>).</p> <p>Blood eosinophil levels of greater than <math>300/\mu\text{L}</math> were associated with improvement in quality of life after treatment with benralizumab but there was no significant difference between subgroups (PMID: 27609408; 25306557; 27609406).</p> <p>Sputum eosinophil level was only considered in one study of reslizumab. Sputum levels were categorized as <math>&gt;</math> or <math>\geq 10\%</math>. There were no differences found between groups.</p> <p>Higher blood sputum levels were associated with a greater improvement in asthma control; however the differences between levels were not significant.</p> <p>As per PICO1, all subjects at eosinophil levels <math>\geq 150/\mu\text{L}</math> experienced a significant reduction in exacerbations.</p> <p>Notably, studies of iv mepolizumab were excluded since only subcutaneous mepolizumab have been approved by the FDA/EMA.</p> | <p>Panel considerations</p> <p>One single-blind, placebo controlled sequential trial (PMID: 28915080) assessed treatment response of weight-adjusted IV reslizumab in patients previously treated with 100-mg SC mepolizumab.</p> <p>They reported that persistently high levels of eosinophils (blood eos <math>&gt;300/\mu\text{L}</math> and sputum eos <math>&gt;3\%</math>) after treatment with mepolizumab characterized non-responders. Treatment of this group with reslizumab lead to improvements in their symptoms and eosinophil levels.</p> |

|                       |                                                                                                                                                                                                                                                                                                                                                                                                                         |                                                                                                                                                                                                                                                                                                                                                                                                                                                                                                                                                                                                                        |                                                                                                                                                                                                                                                                                                                                                                                                                                                                                                                                                                                                                                      |
|-----------------------|-------------------------------------------------------------------------------------------------------------------------------------------------------------------------------------------------------------------------------------------------------------------------------------------------------------------------------------------------------------------------------------------------------------------------|------------------------------------------------------------------------------------------------------------------------------------------------------------------------------------------------------------------------------------------------------------------------------------------------------------------------------------------------------------------------------------------------------------------------------------------------------------------------------------------------------------------------------------------------------------------------------------------------------------------------|--------------------------------------------------------------------------------------------------------------------------------------------------------------------------------------------------------------------------------------------------------------------------------------------------------------------------------------------------------------------------------------------------------------------------------------------------------------------------------------------------------------------------------------------------------------------------------------------------------------------------------------|
| UNDESIRABLE EFFECTS   | <p><b>How substantial are the undesirable anticipated effects?</b></p> <ul style="list-style-type: none"> <li>○ Large</li> <li>○ Moderate</li> <li>○ Small</li> <li>○ Trivial</li> <li>○ Varies</li> <li>○ Don't know</li> </ul>                                                                                                                                                                                        | <p>There were 5 papers reporting results of six RCTs (PMID: 27609406, 27609408, 27056586, 25736990, 27018175) that assessed adverse events. There was no data in mepolizumab. The data suggested that overall there was no difference in adverse events amongst those with higher vs lower eosinophil counts for benralizumab. For Reslizumab, the fewest adverse events occurred in the group who had no data on eosinophil count. There was a slight reduction in the number of adverse events amongst those with an eosinophil count of <math>\geq 400/\mu\text{L}</math> but it was 8% lower (95% CI: 3, 13%).</p> | <p>There was a high incidence of adverse events in both the active-drug (benralizumab and reslizumab) and placebo groups. The apparent benefit from the active-drugs might be explained by a reduction of asthma-related adverse events with the active drugs.</p>                                                                                                                                                                                                                                                                                                                                                                   |
| CERTAINTY OF EVIDENCE | <p><b>What is the overall certainty of the evidence of effects?</b></p> <ul style="list-style-type: none"> <li>● Very low</li> <li>○ Low</li> <li>○ Moderate</li> <li>○ High</li> <li>○ No included studies</li> </ul>                                                                                                                                                                                                  | <p>The level of evidence is very low.</p> <p>The evidence is based on pre-specified or post-hoc subgroup analyses of RCTs that tested whether baseline eosinophil levels were predictive of the therapeutic response to an anti-IL5 strategy. Therefore, there is a potential bias of selective outcome reporting bias. For studies of benralizumab, moderate and severe asthmatics were selected.</p>                                                                                                                                                                                                                 |                                                                                                                                                                                                                                                                                                                                                                                                                                                                                                                                                                                                                                      |
| VALUES                | <p><b>Is there important uncertainty about or variability in how much people value the main outcomes?</b></p> <ul style="list-style-type: none"> <li>○ Important uncertainty or variability</li> <li>● Possibly important uncertainty or variability</li> <li>○ Probably no important uncertainty or variability</li> <li>○ No important uncertainty or variability</li> <li>○ No known undesirable outcomes</li> </ul> |                                                                                                                                                                                                                                                                                                                                                                                                                                                                                                                                                                                                                        | <p>There is no uncertainty in how patients and clinicians value asthma exacerbations. However, there is some uncertainty the impact of measurement of eosinophil level at baseline in predicting outcomes. The data suggests that patients with severe asthma benefit from an anti-IL5 strategy and those with higher levels <math>&gt;300\text{-}500/\mu\text{L}</math> derive greater benefit than those with a level of <math>&lt;150/\mu\text{L}</math>.</p> <p>Different patients may value the benefits / harms of the intervention differently (for instance more value to avoid harms compared to anticipated benefits).</p> |

|                                             |                                                                                                                                                                                                                                                                                                                                                                                                                                   |                                                                                                                                                                                                                                                                                                                                                                                                                                                                                                                                                                                                                           |                                                                                                                                                                                                        |
|---------------------------------------------|-----------------------------------------------------------------------------------------------------------------------------------------------------------------------------------------------------------------------------------------------------------------------------------------------------------------------------------------------------------------------------------------------------------------------------------|---------------------------------------------------------------------------------------------------------------------------------------------------------------------------------------------------------------------------------------------------------------------------------------------------------------------------------------------------------------------------------------------------------------------------------------------------------------------------------------------------------------------------------------------------------------------------------------------------------------------------|--------------------------------------------------------------------------------------------------------------------------------------------------------------------------------------------------------|
| BALANCE OF EFFECTS                          | <p><b>Does the balance between desirable and undesirable effects favor the intervention or the comparison?</b></p> <ul style="list-style-type: none"> <li>○ Favors the comparison</li> <li>○ Probably favors the comparison</li> <li>● Does not favor either the intervention or the comparison</li> <li>○ Probably favors the intervention</li> <li>○ Favors the intervention</li> <li>● Varies</li> <li>○ Don't know</li> </ul> | <p>Most of the data presented suggests that patients with severe asthma benefit from an anti-IL5 strategy. Furthermore, there is some evidence that further benefit may be derived in patients with higher levels of baseline blood eosinophilia &gt; 300 – 500/uL compared to those with an eosinophil level &lt;150/uL.</p> <p>Only mepolizumab showed a significant reduction in asthma exacerbation amongst patients with an eosinophil level of ≥500/uL compared to other levels &gt; 150/uL. However, even subjects with a eosinophil levels between 150 and 300/uL benefited from therapy compared to placebo.</p> |                                                                                                                                                                                                        |
| COST EFFECTIVENESS                          | <p><b>Does the cost-effectiveness of the intervention favor the intervention or the comparison?</b></p> <ul style="list-style-type: none"> <li>○ Favors the comparison</li> <li>○ Probably favors the comparison</li> <li>○ Does not favor either the intervention or the comparison</li> <li>○ Probably favors the intervention</li> <li>○ Favors the intervention</li> <li>○ Varies</li> <li>● No included studies</li> </ul>   | No research evidence available.                                                                                                                                                                                                                                                                                                                                                                                                                                                                                                                                                                                           |                                                                                                                                                                                                        |
| CERTAINTY OF EVIDENCE OF REQUIRED RESOURCES | <p><b>What is the certainty of the evidence of resource requirements (costs)?</b></p> <ul style="list-style-type: none"> <li>○ Very low</li> <li>○ Low</li> <li>○ Moderate</li> <li>○ High</li> <li>● No included studies</li> </ul>                                                                                                                                                                                              | No research evidence available on the cost of the intervention (studying eosinophil level).                                                                                                                                                                                                                                                                                                                                                                                                                                                                                                                               | Cost and feasibility differ based on the biomarker. Blood eosinophil levels are easily ascertained in most blood laboratories; sputum eosinophils are primarily available only in specialized centers. |
| EQUITY                                      | <p><b>What would be the impact on health equity?</b></p> <ul style="list-style-type: none"> <li>○ Reduced</li> <li>○ Probably reduced</li> <li>○ Probably no impact</li> <li>○ Probably increased</li> </ul>                                                                                                                                                                                                                      | No research evidence available.                                                                                                                                                                                                                                                                                                                                                                                                                                                                                                                                                                                           | <p>Consider:</p> <p>Blood eosinophils are very variable and can fluctuate dramatically with oral steroid treatment. In areas, where oral steroid therapy is more common than the use of</p>            |



|               |                                                                                                                                                                                                                                |                                 |                                                                                                                                                                                                                                                                                                                                                                                                                                                                                                                                                                                                                                                                                                                                                        |
|---------------|--------------------------------------------------------------------------------------------------------------------------------------------------------------------------------------------------------------------------------|---------------------------------|--------------------------------------------------------------------------------------------------------------------------------------------------------------------------------------------------------------------------------------------------------------------------------------------------------------------------------------------------------------------------------------------------------------------------------------------------------------------------------------------------------------------------------------------------------------------------------------------------------------------------------------------------------------------------------------------------------------------------------------------------------|
|               | <ul style="list-style-type: none"> <li>○ Increased</li> <li>○ Varies</li> <li>● Don't know</li> </ul>                                                                                                                          |                                 | <p>combination inhalers, blood eosinophils may be lower.</p> <p>Are there groups or settings that might be disadvantaged in relation to the problem or options that are considered?</p> <p>Are there plausible reasons for anticipating differences in the relative effectiveness of the option for disadvantaged groups or settings?</p> <p>Are there different baseline conditions across groups or settings that affect the absolute effectiveness of the option or the importance of the problem for disadvantaged groups or settings?</p> <p>Are there important considerations that should be made when implementing the intervention (option) in order to ensure that inequities are reduced, if possible, and that they are not increased?</p> |
| ACCEPTABILITY | <p><b>Is the intervention acceptable to key stakeholders?</b></p> <ul style="list-style-type: none"> <li>○ No</li> <li>○ Probably no</li> <li>○ Probably yes</li> <li>○ Yes</li> <li>○ Varies</li> <li>● Don't know</li> </ul> | No research evidence available. | <p>There are no data on the acceptability of baseline eosinophil measurement. More data is required to determine whether the use of biomarkers such as eosinophil level to determine therapeutic response would be useful and acceptable.</p> <p>However, as noted above, blood measurement of eosinophils is more easily accessible in standard clinical laboratories than sputum eosinophil measurement.</p>                                                                                                                                                                                                                                                                                                                                         |
| FEASIBILITY   | <p><b>Is the intervention feasible to implement?</b></p> <ul style="list-style-type: none"> <li>○ No</li> <li>○ Probably no</li> <li>○ Probably yes</li> <li>○ Yes</li> <li>● Varies</li> <li>○ Don't know</li> </ul>          | No research evidence available. | <p>Patients may find that some practicalities limit the use / make less feasible the use of the recommended intervention for example the use of sputum eosinophils as it requires a specialized center.</p> <p>It is feasible to implement baseline blood measurement in most settings.</p>                                                                                                                                                                                                                                                                                                                                                                                                                                                            |



Should a measurement of a specific biomarker be used, in addition to total IgE level, to guide initiation of treatment with a monoclonal anti-IgE antibody in adults and children with severe asthma? (biomarkers being exhaled NO, peripheral or sputum eosinophils, and serum periostin)

GRADE Evidence Profile: OMALIZUMAB - PERIOSTIN

| Certainty assessment                                                                                                                                         |                   |                      |               |                                      |                      |                      | № of patients                                                                                                                                                                                                                                                                                                                                                                                                                                                                                                                                                                                                                                                                                                                                                                                                                                                                                                                                                                                                                                                                                                                                                                                                                                                                                                                                                                                                                                                                                               |         | Effect            |                   | Certainty         | Importance      |    |        |                                      |                                    |  |  |  |  |              |     |       |        |                    |                   |  |  |        |                    |                                                                               |  |  |  |  |                                   |  |  |  |  |              |     |        |        |                   |                   |  |  |        |                   |                                                                                 |  |  |  |  |                                                                           |  |  |  |  |             |  |
|--------------------------------------------------------------------------------------------------------------------------------------------------------------|-------------------|----------------------|---------------|--------------------------------------|----------------------|----------------------|-------------------------------------------------------------------------------------------------------------------------------------------------------------------------------------------------------------------------------------------------------------------------------------------------------------------------------------------------------------------------------------------------------------------------------------------------------------------------------------------------------------------------------------------------------------------------------------------------------------------------------------------------------------------------------------------------------------------------------------------------------------------------------------------------------------------------------------------------------------------------------------------------------------------------------------------------------------------------------------------------------------------------------------------------------------------------------------------------------------------------------------------------------------------------------------------------------------------------------------------------------------------------------------------------------------------------------------------------------------------------------------------------------------------------------------------------------------------------------------------------------------|---------|-------------------|-------------------|-------------------|-----------------|----|--------|--------------------------------------|------------------------------------|--|--|--|--|--------------|-----|-------|--------|--------------------|-------------------|--|--|--------|--------------------|-------------------------------------------------------------------------------|--|--|--|--|-----------------------------------|--|--|--|--|--------------|-----|--------|--------|-------------------|-------------------|--|--|--------|-------------------|---------------------------------------------------------------------------------|--|--|--|--|---------------------------------------------------------------------------|--|--|--|--|-------------|--|
| № of studies                                                                                                                                                 | Study design      | Risk of bias         | Inconsistency | Indirectness                         | Imprecision          | Other considerations | omalizumab                                                                                                                                                                                                                                                                                                                                                                                                                                                                                                                                                                                                                                                                                                                                                                                                                                                                                                                                                                                                                                                                                                                                                                                                                                                                                                                                                                                                                                                                                                  | placebo | Relative (95% CI) | Absolute (95% CI) |                   |                 |    |        |                                      |                                    |  |  |  |  |              |     |       |        |                    |                   |  |  |        |                    |                                                                               |  |  |  |  |                                   |  |  |  |  |              |     |        |        |                   |                   |  |  |        |                   |                                                                                 |  |  |  |  |                                                                           |  |  |  |  |             |  |
| Reduction in exacerbation rates per patient<br>Follow up: 48 weeks<br>(higher percentage, better reduction)                                                  |                   |                      |               |                                      |                      |                      |                                                                                                                                                                                                                                                                                                                                                                                                                                                                                                                                                                                                                                                                                                                                                                                                                                                                                                                                                                                                                                                                                                                                                                                                                                                                                                                                                                                                                                                                                                             |         |                   |                   |                   |                 |    |        |                                      |                                    |  |  |  |  |              |     |       |        |                    |                   |  |  |        |                    |                                                                               |  |  |  |  |                                   |  |  |  |  |              |     |        |        |                   |                   |  |  |        |                   |                                                                                 |  |  |  |  |                                                                           |  |  |  |  |             |  |
| 1 (534 participants) <sup>1</sup>                                                                                                                            | randomised trials | serious <sup>a</sup> | not serious   | not serious                          | serious <sup>b</sup> | none                 | Relative reduction in exacerbation rate of omalizumab compared to placebo were: Periostin (≥50 ng/ml): 30% (95% CI: -2 to 51); p-value= 0.07 Periostin (<50 ng/ml): 3% (95% CI: -43 to 32); p-value= 0.94 Number of patients: 534; test for subgroup differences: no available                                                                                                                                                                                                                                                                                                                                                                                                                                                                                                                                                                                                                                                                                                                                                                                                                                                                                                                                                                                                                                                                                                                                                                                                                              |         |                   |                   | ⊕⊕○○<br>LOW       |                 |    |        |                                      |                                    |  |  |  |  |              |     |       |        |                    |                   |  |  |        |                    |                                                                               |  |  |  |  |                                   |  |  |  |  |              |     |        |        |                   |                   |  |  |        |                   |                                                                                 |  |  |  |  |                                                                           |  |  |  |  |             |  |
| Change from baseline at week 48 in AQLQ<br>Follow up: 48 weeks<br>7-point scale (7 = not impaired at all - 1 = severely impaired; higher values, better QoL) |                   |                      |               |                                      |                      |                      |                                                                                                                                                                                                                                                                                                                                                                                                                                                                                                                                                                                                                                                                                                                                                                                                                                                                                                                                                                                                                                                                                                                                                                                                                                                                                                                                                                                                                                                                                                             |         |                   |                   |                   |                 |    |        |                                      |                                    |  |  |  |  |              |     |       |        |                    |                   |  |  |        |                    |                                                                               |  |  |  |  |                                   |  |  |  |  |              |     |        |        |                   |                   |  |  |        |                   |                                                                                 |  |  |  |  |                                                                           |  |  |  |  |             |  |
| 1 (534 participants) <sup>1</sup>                                                                                                                            | randomised trials | serious <sup>a</sup> | not serious   | not serious                          | serious <sup>b</sup> | none                 | <p>Mean change from baseline to week 48 of omalizumab compared to placebo were: Periostin (≥50 ng/ml): Least square mean difference= 0.10 (95% CI: -0.19 to 0.40); p-value= 0.51 Periostin(&lt;50 ng/ml): Least square mean difference= 0.50 (95% CI: 0.22 to 0.77); p-value= 0.0005 Number of patients: 534; test for subgroup differences: P=0.05 <sup>c</sup></p> <table><thead><tr><th>Study or Subgroup</th><th>Mean Difference</th><th>SE</th><th>Weight</th><th>Mean Difference<br/>IV, Fixed, 95% CI</th></tr></thead><tbody><tr><td colspan="5"><b>3.1.1 High periostin levels</b></td></tr><tr><td>Hanania 2013</td><td>0.1</td><td>0.148</td><td>100.0%</td><td>0.10 [-0.19, 0.39]</td></tr><tr><td>Subtotal (95% CI)</td><td></td><td></td><td>100.0%</td><td>0.10 [-0.19, 0.39]</td></tr><tr><td colspan="5">Heterogeneity: Not applicable<br/>Test for overall effect: Z = 0.68 (P = 0.50)</td></tr><tr><td colspan="5"><b>3.1.2 Low periostin levels</b></td></tr><tr><td>Hanania 2013</td><td>0.5</td><td>0.1428</td><td>100.0%</td><td>0.50 [0.22, 0.78]</td></tr><tr><td>Subtotal (95% CI)</td><td></td><td></td><td>100.0%</td><td>0.50 [0.22, 0.78]</td></tr><tr><td colspan="5">Heterogeneity: Not applicable<br/>Test for overall effect: Z = 3.50 (P = 0.0005)</td></tr><tr><td colspan="5">Test for subgroup differences: Chi² = 3.78, df = 1 (P = 0.05), I² = 73.5%</td></tr></tbody></table> 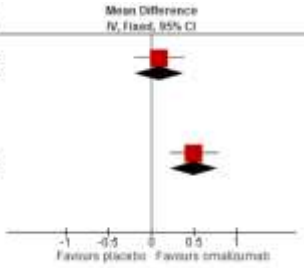 |         |                   |                   | Study or Subgroup | Mean Difference | SE | Weight | Mean Difference<br>IV, Fixed, 95% CI | <b>3.1.1 High periostin levels</b> |  |  |  |  | Hanania 2013 | 0.1 | 0.148 | 100.0% | 0.10 [-0.19, 0.39] | Subtotal (95% CI) |  |  | 100.0% | 0.10 [-0.19, 0.39] | Heterogeneity: Not applicable<br>Test for overall effect: Z = 0.68 (P = 0.50) |  |  |  |  | <b>3.1.2 Low periostin levels</b> |  |  |  |  | Hanania 2013 | 0.5 | 0.1428 | 100.0% | 0.50 [0.22, 0.78] | Subtotal (95% CI) |  |  | 100.0% | 0.50 [0.22, 0.78] | Heterogeneity: Not applicable<br>Test for overall effect: Z = 3.50 (P = 0.0005) |  |  |  |  | Test for subgroup differences: Chi² = 3.78, df = 1 (P = 0.05), I² = 73.5% |  |  |  |  | ⊕⊕○○<br>LOW |  |
| Study or Subgroup                                                                                                                                            | Mean Difference   | SE                   | Weight        | Mean Difference<br>IV, Fixed, 95% CI |                      |                      |                                                                                                                                                                                                                                                                                                                                                                                                                                                                                                                                                                                                                                                                                                                                                                                                                                                                                                                                                                                                                                                                                                                                                                                                                                                                                                                                                                                                                                                                                                             |         |                   |                   |                   |                 |    |        |                                      |                                    |  |  |  |  |              |     |       |        |                    |                   |  |  |        |                    |                                                                               |  |  |  |  |                                   |  |  |  |  |              |     |        |        |                   |                   |  |  |        |                   |                                                                                 |  |  |  |  |                                                                           |  |  |  |  |             |  |
| <b>3.1.1 High periostin levels</b>                                                                                                                           |                   |                      |               |                                      |                      |                      |                                                                                                                                                                                                                                                                                                                                                                                                                                                                                                                                                                                                                                                                                                                                                                                                                                                                                                                                                                                                                                                                                                                                                                                                                                                                                                                                                                                                                                                                                                             |         |                   |                   |                   |                 |    |        |                                      |                                    |  |  |  |  |              |     |       |        |                    |                   |  |  |        |                    |                                                                               |  |  |  |  |                                   |  |  |  |  |              |     |        |        |                   |                   |  |  |        |                   |                                                                                 |  |  |  |  |                                                                           |  |  |  |  |             |  |
| Hanania 2013                                                                                                                                                 | 0.1               | 0.148                | 100.0%        | 0.10 [-0.19, 0.39]                   |                      |                      |                                                                                                                                                                                                                                                                                                                                                                                                                                                                                                                                                                                                                                                                                                                                                                                                                                                                                                                                                                                                                                                                                                                                                                                                                                                                                                                                                                                                                                                                                                             |         |                   |                   |                   |                 |    |        |                                      |                                    |  |  |  |  |              |     |       |        |                    |                   |  |  |        |                    |                                                                               |  |  |  |  |                                   |  |  |  |  |              |     |        |        |                   |                   |  |  |        |                   |                                                                                 |  |  |  |  |                                                                           |  |  |  |  |             |  |
| Subtotal (95% CI)                                                                                                                                            |                   |                      | 100.0%        | 0.10 [-0.19, 0.39]                   |                      |                      |                                                                                                                                                                                                                                                                                                                                                                                                                                                                                                                                                                                                                                                                                                                                                                                                                                                                                                                                                                                                                                                                                                                                                                                                                                                                                                                                                                                                                                                                                                             |         |                   |                   |                   |                 |    |        |                                      |                                    |  |  |  |  |              |     |       |        |                    |                   |  |  |        |                    |                                                                               |  |  |  |  |                                   |  |  |  |  |              |     |        |        |                   |                   |  |  |        |                   |                                                                                 |  |  |  |  |                                                                           |  |  |  |  |             |  |
| Heterogeneity: Not applicable<br>Test for overall effect: Z = 0.68 (P = 0.50)                                                                                |                   |                      |               |                                      |                      |                      |                                                                                                                                                                                                                                                                                                                                                                                                                                                                                                                                                                                                                                                                                                                                                                                                                                                                                                                                                                                                                                                                                                                                                                                                                                                                                                                                                                                                                                                                                                             |         |                   |                   |                   |                 |    |        |                                      |                                    |  |  |  |  |              |     |       |        |                    |                   |  |  |        |                    |                                                                               |  |  |  |  |                                   |  |  |  |  |              |     |        |        |                   |                   |  |  |        |                   |                                                                                 |  |  |  |  |                                                                           |  |  |  |  |             |  |
| <b>3.1.2 Low periostin levels</b>                                                                                                                            |                   |                      |               |                                      |                      |                      |                                                                                                                                                                                                                                                                                                                                                                                                                                                                                                                                                                                                                                                                                                                                                                                                                                                                                                                                                                                                                                                                                                                                                                                                                                                                                                                                                                                                                                                                                                             |         |                   |                   |                   |                 |    |        |                                      |                                    |  |  |  |  |              |     |       |        |                    |                   |  |  |        |                    |                                                                               |  |  |  |  |                                   |  |  |  |  |              |     |        |        |                   |                   |  |  |        |                   |                                                                                 |  |  |  |  |                                                                           |  |  |  |  |             |  |
| Hanania 2013                                                                                                                                                 | 0.5               | 0.1428               | 100.0%        | 0.50 [0.22, 0.78]                    |                      |                      |                                                                                                                                                                                                                                                                                                                                                                                                                                                                                                                                                                                                                                                                                                                                                                                                                                                                                                                                                                                                                                                                                                                                                                                                                                                                                                                                                                                                                                                                                                             |         |                   |                   |                   |                 |    |        |                                      |                                    |  |  |  |  |              |     |       |        |                    |                   |  |  |        |                    |                                                                               |  |  |  |  |                                   |  |  |  |  |              |     |        |        |                   |                   |  |  |        |                   |                                                                                 |  |  |  |  |                                                                           |  |  |  |  |             |  |
| Subtotal (95% CI)                                                                                                                                            |                   |                      | 100.0%        | 0.50 [0.22, 0.78]                    |                      |                      |                                                                                                                                                                                                                                                                                                                                                                                                                                                                                                                                                                                                                                                                                                                                                                                                                                                                                                                                                                                                                                                                                                                                                                                                                                                                                                                                                                                                                                                                                                             |         |                   |                   |                   |                 |    |        |                                      |                                    |  |  |  |  |              |     |       |        |                    |                   |  |  |        |                    |                                                                               |  |  |  |  |                                   |  |  |  |  |              |     |        |        |                   |                   |  |  |        |                   |                                                                                 |  |  |  |  |                                                                           |  |  |  |  |             |  |
| Heterogeneity: Not applicable<br>Test for overall effect: Z = 3.50 (P = 0.0005)                                                                              |                   |                      |               |                                      |                      |                      |                                                                                                                                                                                                                                                                                                                                                                                                                                                                                                                                                                                                                                                                                                                                                                                                                                                                                                                                                                                                                                                                                                                                                                                                                                                                                                                                                                                                                                                                                                             |         |                   |                   |                   |                 |    |        |                                      |                                    |  |  |  |  |              |     |       |        |                    |                   |  |  |        |                    |                                                                               |  |  |  |  |                                   |  |  |  |  |              |     |        |        |                   |                   |  |  |        |                   |                                                                                 |  |  |  |  |                                                                           |  |  |  |  |             |  |
| Test for subgroup differences: Chi² = 3.78, df = 1 (P = 0.05), I² = 73.5%                                                                                    |                   |                      |               |                                      |                      |                      |                                                                                                                                                                                                                                                                                                                                                                                                                                                                                                                                                                                                                                                                                                                                                                                                                                                                                                                                                                                                                                                                                                                                                                                                                                                                                                                                                                                                                                                                                                             |         |                   |                   |                   |                 |    |        |                                      |                                    |  |  |  |  |              |     |       |        |                    |                   |  |  |        |                    |                                                                               |  |  |  |  |                                   |  |  |  |  |              |     |        |        |                   |                   |  |  |        |                   |                                                                                 |  |  |  |  |                                                                           |  |  |  |  |             |  |
| Change from baseline in % predicted FEV1<br>Follow up: 48 weeks<br>(higher change, better outcome)                                                           |                   |                      |               |                                      |                      |                      |                                                                                                                                                                                                                                                                                                                                                                                                                                                                                                                                                                                                                                                                                                                                                                                                                                                                                                                                                                                                                                                                                                                                                                                                                                                                                                                                                                                                                                                                                                             |         |                   |                   |                   |                 |    |        |                                      |                                    |  |  |  |  |              |     |       |        |                    |                   |  |  |        |                    |                                                                               |  |  |  |  |                                   |  |  |  |  |              |     |        |        |                   |                   |  |  |        |                   |                                                                                 |  |  |  |  |                                                                           |  |  |  |  |             |  |

| Certainty assessment                                                                                |                     |                      |                |                    |                                   |                               | № of patients                                                                                                                                                                                                                                                                                                                                                                                                                                                                                                                                                                                                                                                                                                                                                                                                                                                                                                                                                                                                                                                                                                                                                                                                                                                                                                                                                                                                                                                                                                                                                                                                                                                                                                                                                                                                                                     |         | Effect            |                   | Certainty         | Importance          |                    |                |                  |                                   |                                    |                               |                                    |  |  |  |              |      |        |        |                    |     |                   |     |     |        |                    |  |                               |  |     |  |     |        |                                              |  |                       |  |  |  |                                   |  |  |  |                               |  |              |      |     |        |                    |  |                                              |  |  |        |                    |  |                               |  |                                   |  |  |  |                                              |  |  |  |              |     |                                                                        |     |     |        |                   |  |                   |  |     |  |     |        |                   |  |                       |  |  |  |  |  |  |  |                               |  |  |  |  |  |  |  |                                              |  |  |  |  |  |  |  |                                                                        |  |  |  |  |  |  |  |             |  |
|-----------------------------------------------------------------------------------------------------|---------------------|----------------------|----------------|--------------------|-----------------------------------|-------------------------------|---------------------------------------------------------------------------------------------------------------------------------------------------------------------------------------------------------------------------------------------------------------------------------------------------------------------------------------------------------------------------------------------------------------------------------------------------------------------------------------------------------------------------------------------------------------------------------------------------------------------------------------------------------------------------------------------------------------------------------------------------------------------------------------------------------------------------------------------------------------------------------------------------------------------------------------------------------------------------------------------------------------------------------------------------------------------------------------------------------------------------------------------------------------------------------------------------------------------------------------------------------------------------------------------------------------------------------------------------------------------------------------------------------------------------------------------------------------------------------------------------------------------------------------------------------------------------------------------------------------------------------------------------------------------------------------------------------------------------------------------------------------------------------------------------------------------------------------------------|---------|-------------------|-------------------|-------------------|---------------------|--------------------|----------------|------------------|-----------------------------------|------------------------------------|-------------------------------|------------------------------------|--|--|--|--------------|------|--------|--------|--------------------|-----|-------------------|-----|-----|--------|--------------------|--|-------------------------------|--|-----|--|-----|--------|----------------------------------------------|--|-----------------------|--|--|--|-----------------------------------|--|--|--|-------------------------------|--|--------------|------|-----|--------|--------------------|--|----------------------------------------------|--|--|--------|--------------------|--|-------------------------------|--|-----------------------------------|--|--|--|----------------------------------------------|--|--|--|--------------|-----|------------------------------------------------------------------------|-----|-----|--------|-------------------|--|-------------------|--|-----|--|-----|--------|-------------------|--|-----------------------|--|--|--|--|--|--|--|-------------------------------|--|--|--|--|--|--|--|----------------------------------------------|--|--|--|--|--|--|--|------------------------------------------------------------------------|--|--|--|--|--|--|--|-------------|--|
| № of studies                                                                                        | Study design        | Risk of bias         | Inconsistency  | Indirectness       | Imprecision                       | Other considerations          | omalizumab                                                                                                                                                                                                                                                                                                                                                                                                                                                                                                                                                                                                                                                                                                                                                                                                                                                                                                                                                                                                                                                                                                                                                                                                                                                                                                                                                                                                                                                                                                                                                                                                                                                                                                                                                                                                                                        | placebo | Relative (95% CI) | Absolute (95% CI) |                   |                     |                    |                |                  |                                   |                                    |                               |                                    |  |  |  |              |      |        |        |                    |     |                   |     |     |        |                    |  |                               |  |     |  |     |        |                                              |  |                       |  |  |  |                                   |  |  |  |                               |  |              |      |     |        |                    |  |                                              |  |  |        |                    |  |                               |  |                                   |  |  |  |                                              |  |  |  |              |     |                                                                        |     |     |        |                   |  |                   |  |     |  |     |        |                   |  |                       |  |  |  |  |  |  |  |                               |  |  |  |  |  |  |  |                                              |  |  |  |  |  |  |  |                                                                        |  |  |  |  |  |  |  |             |  |
| 1 (534 participants) <sup>1</sup>                                                                   | randomised trials   | serious <sup>a</sup> | not serious    | not serious        | serious <sup>b</sup>              | none                          | <p>Mean change from baseline to week 48 of omalizumab compared to placebo were: Periostin (≥50 ng/ml): Least square mean difference= 0.42 (95% CI: -3.22 to 4.06); p-value= 0.82 Periostin (&lt;50 ng/ml): Least square mean difference= 1.79 (95% CI: -1.15 to 4.73); p-value= 0.23 Number of patients: 534; test for subgroup differences: P=0.57 <sup>c</sup></p> <table><thead><tr><th>Study or Subgroup</th><th>Mean Difference</th><th>SE</th><th>Weight</th><th>N, Fixed, 95% CI</th><th>Mean Difference IV, Fixed, 95% CI</th></tr></thead><tbody><tr><td colspan="6"><b>3.2.1 High periostin levels</b></td></tr><tr><td>Hanania 2013</td><td>0.42</td><td>1.8572</td><td>100.0%</td><td>0.42 [-3.22, 4.06]</td><td></td></tr><tr><td>Subtotal (95% CI)</td><td></td><td></td><td>100.0%</td><td>0.42 [-3.22, 4.06]</td><td></td></tr><tr><td colspan="6">Heterogeneity: Not applicable</td></tr><tr><td colspan="6">Test for overall effect: Z = 0.23 (P = 0.82)</td></tr><tr><td colspan="6"><b>3.2.2 Low periostin levels</b></td></tr><tr><td>Hanania 2013</td><td>1.79</td><td>1.5</td><td>100.0%</td><td>1.79 [-1.15, 4.73]</td><td></td></tr><tr><td>Subtotal (95% CI)</td><td></td><td></td><td>100.0%</td><td>1.79 [-1.15, 4.73]</td><td></td></tr><tr><td colspan="6">Heterogeneity: Not applicable</td></tr><tr><td colspan="6">Test for overall effect: Z = 1.19 (P = 0.23)</td></tr><tr><td colspan="6">Test for subgroup differences: Chi² = 0.33, df = 1 (P = 0.57), I² = 0%</td></tr></tbody></table> 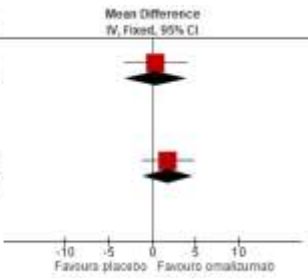                                                                                                                                                                                                                                |         |                   |                   | Study or Subgroup | Mean Difference     | SE                 | Weight         | N, Fixed, 95% CI | Mean Difference IV, Fixed, 95% CI | <b>3.2.1 High periostin levels</b> |                               |                                    |  |  |  | Hanania 2013 | 0.42 | 1.8572 | 100.0% | 0.42 [-3.22, 4.06] |     | Subtotal (95% CI) |     |     | 100.0% | 0.42 [-3.22, 4.06] |  | Heterogeneity: Not applicable |  |     |  |     |        | Test for overall effect: Z = 0.23 (P = 0.82) |  |                       |  |  |  | <b>3.2.2 Low periostin levels</b> |  |  |  |                               |  | Hanania 2013 | 1.79 | 1.5 | 100.0% | 1.79 [-1.15, 4.73] |  | Subtotal (95% CI)                            |  |  | 100.0% | 1.79 [-1.15, 4.73] |  | Heterogeneity: Not applicable |  |                                   |  |  |  | Test for overall effect: Z = 1.19 (P = 0.23) |  |  |  |              |     | Test for subgroup differences: Chi² = 0.33, df = 1 (P = 0.57), I² = 0% |     |     |        |                   |  | ⊕⊕○○<br>LOW       |  |     |  |     |        |                   |  |                       |  |  |  |  |  |  |  |                               |  |  |  |  |  |  |  |                                              |  |  |  |  |  |  |  |                                                                        |  |  |  |  |  |  |  |             |  |
| Study or Subgroup                                                                                   | Mean Difference     | SE                   | Weight         | N, Fixed, 95% CI   | Mean Difference IV, Fixed, 95% CI |                               |                                                                                                                                                                                                                                                                                                                                                                                                                                                                                                                                                                                                                                                                                                                                                                                                                                                                                                                                                                                                                                                                                                                                                                                                                                                                                                                                                                                                                                                                                                                                                                                                                                                                                                                                                                                                                                                   |         |                   |                   |                   |                     |                    |                |                  |                                   |                                    |                               |                                    |  |  |  |              |      |        |        |                    |     |                   |     |     |        |                    |  |                               |  |     |  |     |        |                                              |  |                       |  |  |  |                                   |  |  |  |                               |  |              |      |     |        |                    |  |                                              |  |  |        |                    |  |                               |  |                                   |  |  |  |                                              |  |  |  |              |     |                                                                        |     |     |        |                   |  |                   |  |     |  |     |        |                   |  |                       |  |  |  |  |  |  |  |                               |  |  |  |  |  |  |  |                                              |  |  |  |  |  |  |  |                                                                        |  |  |  |  |  |  |  |             |  |
| <b>3.2.1 High periostin levels</b>                                                                  |                     |                      |                |                    |                                   |                               |                                                                                                                                                                                                                                                                                                                                                                                                                                                                                                                                                                                                                                                                                                                                                                                                                                                                                                                                                                                                                                                                                                                                                                                                                                                                                                                                                                                                                                                                                                                                                                                                                                                                                                                                                                                                                                                   |         |                   |                   |                   |                     |                    |                |                  |                                   |                                    |                               |                                    |  |  |  |              |      |        |        |                    |     |                   |     |     |        |                    |  |                               |  |     |  |     |        |                                              |  |                       |  |  |  |                                   |  |  |  |                               |  |              |      |     |        |                    |  |                                              |  |  |        |                    |  |                               |  |                                   |  |  |  |                                              |  |  |  |              |     |                                                                        |     |     |        |                   |  |                   |  |     |  |     |        |                   |  |                       |  |  |  |  |  |  |  |                               |  |  |  |  |  |  |  |                                              |  |  |  |  |  |  |  |                                                                        |  |  |  |  |  |  |  |             |  |
| Hanania 2013                                                                                        | 0.42                | 1.8572               | 100.0%         | 0.42 [-3.22, 4.06] |                                   |                               |                                                                                                                                                                                                                                                                                                                                                                                                                                                                                                                                                                                                                                                                                                                                                                                                                                                                                                                                                                                                                                                                                                                                                                                                                                                                                                                                                                                                                                                                                                                                                                                                                                                                                                                                                                                                                                                   |         |                   |                   |                   |                     |                    |                |                  |                                   |                                    |                               |                                    |  |  |  |              |      |        |        |                    |     |                   |     |     |        |                    |  |                               |  |     |  |     |        |                                              |  |                       |  |  |  |                                   |  |  |  |                               |  |              |      |     |        |                    |  |                                              |  |  |        |                    |  |                               |  |                                   |  |  |  |                                              |  |  |  |              |     |                                                                        |     |     |        |                   |  |                   |  |     |  |     |        |                   |  |                       |  |  |  |  |  |  |  |                               |  |  |  |  |  |  |  |                                              |  |  |  |  |  |  |  |                                                                        |  |  |  |  |  |  |  |             |  |
| Subtotal (95% CI)                                                                                   |                     |                      | 100.0%         | 0.42 [-3.22, 4.06] |                                   |                               |                                                                                                                                                                                                                                                                                                                                                                                                                                                                                                                                                                                                                                                                                                                                                                                                                                                                                                                                                                                                                                                                                                                                                                                                                                                                                                                                                                                                                                                                                                                                                                                                                                                                                                                                                                                                                                                   |         |                   |                   |                   |                     |                    |                |                  |                                   |                                    |                               |                                    |  |  |  |              |      |        |        |                    |     |                   |     |     |        |                    |  |                               |  |     |  |     |        |                                              |  |                       |  |  |  |                                   |  |  |  |                               |  |              |      |     |        |                    |  |                                              |  |  |        |                    |  |                               |  |                                   |  |  |  |                                              |  |  |  |              |     |                                                                        |     |     |        |                   |  |                   |  |     |  |     |        |                   |  |                       |  |  |  |  |  |  |  |                               |  |  |  |  |  |  |  |                                              |  |  |  |  |  |  |  |                                                                        |  |  |  |  |  |  |  |             |  |
| Heterogeneity: Not applicable                                                                       |                     |                      |                |                    |                                   |                               |                                                                                                                                                                                                                                                                                                                                                                                                                                                                                                                                                                                                                                                                                                                                                                                                                                                                                                                                                                                                                                                                                                                                                                                                                                                                                                                                                                                                                                                                                                                                                                                                                                                                                                                                                                                                                                                   |         |                   |                   |                   |                     |                    |                |                  |                                   |                                    |                               |                                    |  |  |  |              |      |        |        |                    |     |                   |     |     |        |                    |  |                               |  |     |  |     |        |                                              |  |                       |  |  |  |                                   |  |  |  |                               |  |              |      |     |        |                    |  |                                              |  |  |        |                    |  |                               |  |                                   |  |  |  |                                              |  |  |  |              |     |                                                                        |     |     |        |                   |  |                   |  |     |  |     |        |                   |  |                       |  |  |  |  |  |  |  |                               |  |  |  |  |  |  |  |                                              |  |  |  |  |  |  |  |                                                                        |  |  |  |  |  |  |  |             |  |
| Test for overall effect: Z = 0.23 (P = 0.82)                                                        |                     |                      |                |                    |                                   |                               |                                                                                                                                                                                                                                                                                                                                                                                                                                                                                                                                                                                                                                                                                                                                                                                                                                                                                                                                                                                                                                                                                                                                                                                                                                                                                                                                                                                                                                                                                                                                                                                                                                                                                                                                                                                                                                                   |         |                   |                   |                   |                     |                    |                |                  |                                   |                                    |                               |                                    |  |  |  |              |      |        |        |                    |     |                   |     |     |        |                    |  |                               |  |     |  |     |        |                                              |  |                       |  |  |  |                                   |  |  |  |                               |  |              |      |     |        |                    |  |                                              |  |  |        |                    |  |                               |  |                                   |  |  |  |                                              |  |  |  |              |     |                                                                        |     |     |        |                   |  |                   |  |     |  |     |        |                   |  |                       |  |  |  |  |  |  |  |                               |  |  |  |  |  |  |  |                                              |  |  |  |  |  |  |  |                                                                        |  |  |  |  |  |  |  |             |  |
| <b>3.2.2 Low periostin levels</b>                                                                   |                     |                      |                |                    |                                   |                               |                                                                                                                                                                                                                                                                                                                                                                                                                                                                                                                                                                                                                                                                                                                                                                                                                                                                                                                                                                                                                                                                                                                                                                                                                                                                                                                                                                                                                                                                                                                                                                                                                                                                                                                                                                                                                                                   |         |                   |                   |                   |                     |                    |                |                  |                                   |                                    |                               |                                    |  |  |  |              |      |        |        |                    |     |                   |     |     |        |                    |  |                               |  |     |  |     |        |                                              |  |                       |  |  |  |                                   |  |  |  |                               |  |              |      |     |        |                    |  |                                              |  |  |        |                    |  |                               |  |                                   |  |  |  |                                              |  |  |  |              |     |                                                                        |     |     |        |                   |  |                   |  |     |  |     |        |                   |  |                       |  |  |  |  |  |  |  |                               |  |  |  |  |  |  |  |                                              |  |  |  |  |  |  |  |                                                                        |  |  |  |  |  |  |  |             |  |
| Hanania 2013                                                                                        | 1.79                | 1.5                  | 100.0%         | 1.79 [-1.15, 4.73] |                                   |                               |                                                                                                                                                                                                                                                                                                                                                                                                                                                                                                                                                                                                                                                                                                                                                                                                                                                                                                                                                                                                                                                                                                                                                                                                                                                                                                                                                                                                                                                                                                                                                                                                                                                                                                                                                                                                                                                   |         |                   |                   |                   |                     |                    |                |                  |                                   |                                    |                               |                                    |  |  |  |              |      |        |        |                    |     |                   |     |     |        |                    |  |                               |  |     |  |     |        |                                              |  |                       |  |  |  |                                   |  |  |  |                               |  |              |      |     |        |                    |  |                                              |  |  |        |                    |  |                               |  |                                   |  |  |  |                                              |  |  |  |              |     |                                                                        |     |     |        |                   |  |                   |  |     |  |     |        |                   |  |                       |  |  |  |  |  |  |  |                               |  |  |  |  |  |  |  |                                              |  |  |  |  |  |  |  |                                                                        |  |  |  |  |  |  |  |             |  |
| Subtotal (95% CI)                                                                                   |                     |                      | 100.0%         | 1.79 [-1.15, 4.73] |                                   |                               |                                                                                                                                                                                                                                                                                                                                                                                                                                                                                                                                                                                                                                                                                                                                                                                                                                                                                                                                                                                                                                                                                                                                                                                                                                                                                                                                                                                                                                                                                                                                                                                                                                                                                                                                                                                                                                                   |         |                   |                   |                   |                     |                    |                |                  |                                   |                                    |                               |                                    |  |  |  |              |      |        |        |                    |     |                   |     |     |        |                    |  |                               |  |     |  |     |        |                                              |  |                       |  |  |  |                                   |  |  |  |                               |  |              |      |     |        |                    |  |                                              |  |  |        |                    |  |                               |  |                                   |  |  |  |                                              |  |  |  |              |     |                                                                        |     |     |        |                   |  |                   |  |     |  |     |        |                   |  |                       |  |  |  |  |  |  |  |                               |  |  |  |  |  |  |  |                                              |  |  |  |  |  |  |  |                                                                        |  |  |  |  |  |  |  |             |  |
| Heterogeneity: Not applicable                                                                       |                     |                      |                |                    |                                   |                               |                                                                                                                                                                                                                                                                                                                                                                                                                                                                                                                                                                                                                                                                                                                                                                                                                                                                                                                                                                                                                                                                                                                                                                                                                                                                                                                                                                                                                                                                                                                                                                                                                                                                                                                                                                                                                                                   |         |                   |                   |                   |                     |                    |                |                  |                                   |                                    |                               |                                    |  |  |  |              |      |        |        |                    |     |                   |     |     |        |                    |  |                               |  |     |  |     |        |                                              |  |                       |  |  |  |                                   |  |  |  |                               |  |              |      |     |        |                    |  |                                              |  |  |        |                    |  |                               |  |                                   |  |  |  |                                              |  |  |  |              |     |                                                                        |     |     |        |                   |  |                   |  |     |  |     |        |                   |  |                       |  |  |  |  |  |  |  |                               |  |  |  |  |  |  |  |                                              |  |  |  |  |  |  |  |                                                                        |  |  |  |  |  |  |  |             |  |
| Test for overall effect: Z = 1.19 (P = 0.23)                                                        |                     |                      |                |                    |                                   |                               |                                                                                                                                                                                                                                                                                                                                                                                                                                                                                                                                                                                                                                                                                                                                                                                                                                                                                                                                                                                                                                                                                                                                                                                                                                                                                                                                                                                                                                                                                                                                                                                                                                                                                                                                                                                                                                                   |         |                   |                   |                   |                     |                    |                |                  |                                   |                                    |                               |                                    |  |  |  |              |      |        |        |                    |     |                   |     |     |        |                    |  |                               |  |     |  |     |        |                                              |  |                       |  |  |  |                                   |  |  |  |                               |  |              |      |     |        |                    |  |                                              |  |  |        |                    |  |                               |  |                                   |  |  |  |                                              |  |  |  |              |     |                                                                        |     |     |        |                   |  |                   |  |     |  |     |        |                   |  |                       |  |  |  |  |  |  |  |                               |  |  |  |  |  |  |  |                                              |  |  |  |  |  |  |  |                                                                        |  |  |  |  |  |  |  |             |  |
| Test for subgroup differences: Chi² = 0.33, df = 1 (P = 0.57), I² = 0%                              |                     |                      |                |                    |                                   |                               |                                                                                                                                                                                                                                                                                                                                                                                                                                                                                                                                                                                                                                                                                                                                                                                                                                                                                                                                                                                                                                                                                                                                                                                                                                                                                                                                                                                                                                                                                                                                                                                                                                                                                                                                                                                                                                                   |         |                   |                   |                   |                     |                    |                |                  |                                   |                                    |                               |                                    |  |  |  |              |      |        |        |                    |     |                   |     |     |        |                    |  |                               |  |     |  |     |        |                                              |  |                       |  |  |  |                                   |  |  |  |                               |  |              |      |     |        |                    |  |                                              |  |  |        |                    |  |                               |  |                                   |  |  |  |                                              |  |  |  |              |     |                                                                        |     |     |        |                   |  |                   |  |     |  |     |        |                   |  |                       |  |  |  |  |  |  |  |                               |  |  |  |  |  |  |  |                                              |  |  |  |  |  |  |  |                                                                        |  |  |  |  |  |  |  |             |  |
| Adverse events<br>Follow up: 48 weeks<br>(higher values, worst outcome)                             |                     |                      |                |                    |                                   |                               |                                                                                                                                                                                                                                                                                                                                                                                                                                                                                                                                                                                                                                                                                                                                                                                                                                                                                                                                                                                                                                                                                                                                                                                                                                                                                                                                                                                                                                                                                                                                                                                                                                                                                                                                                                                                                                                   |         |                   |                   |                   |                     |                    |                |                  |                                   |                                    |                               |                                    |  |  |  |              |      |        |        |                    |     |                   |     |     |        |                    |  |                               |  |     |  |     |        |                                              |  |                       |  |  |  |                                   |  |  |  |                               |  |              |      |     |        |                    |  |                                              |  |  |        |                    |  |                               |  |                                   |  |  |  |                                              |  |  |  |              |     |                                                                        |     |     |        |                   |  |                   |  |     |  |     |        |                   |  |                       |  |  |  |  |  |  |  |                               |  |  |  |  |  |  |  |                                              |  |  |  |  |  |  |  |                                                                        |  |  |  |  |  |  |  |             |  |
| 1 (534 participants) <sup>1</sup>                                                                   | randomised trials   | serious <sup>a</sup> | not serious    | not serious        | serious <sup>b</sup>              | none                          | <p>Percentage of patients with treatment-related adverse events of omalizumab compared to placebo were: Periostin (≥50 ng/ml): 82% versus 81%; RR= 1.01 (95% CI= 0.90 to 1.14) Periostin (&lt;50 ng/ml): 84% versus 82%; RR= 1.03 (95% CI= 0.92 to 1.14) Number of patients: 534; test for subgroup differences: P=0.87</p> <table><thead><tr><th>Study or Subgroup</th><th>Experimental Events</th><th>Experimental Total</th><th>Control Events</th><th>Control Total</th><th>Weight</th><th>Risk Ratio M-H, Fixed, 95% CI</th><th>Risk Ratio M-H, Fixed, 95% CI</th></tr></thead><tbody><tr><td colspan="8"><b>3.3.1 High periostin levels</b></td></tr><tr><td>Hanania 2013</td><td>105</td><td>128</td><td>103</td><td>127</td><td>100.0%</td><td>1.01 [0.90, 1.14]</td><td></td></tr><tr><td>Subtotal (95% CI)</td><td></td><td>128</td><td></td><td>127</td><td>100.0%</td><td>1.01 [0.90, 1.14]</td><td></td></tr><tr><td colspan="8">Total events: 105 103</td></tr><tr><td colspan="8">Heterogeneity: Not applicable</td></tr><tr><td colspan="8">Test for overall effect: Z = 0.19 (P = 0.85)</td></tr><tr><td colspan="8"><b>3.3.2 Low periostin levels</b></td></tr><tr><td>Hanania 2013</td><td>119</td><td>142</td><td>112</td><td>137</td><td>100.0%</td><td>1.03 [0.92, 1.14]</td><td></td></tr><tr><td>Subtotal (95% CI)</td><td></td><td>142</td><td></td><td>137</td><td>100.0%</td><td>1.03 [0.92, 1.14]</td><td></td></tr><tr><td colspan="8">Total events: 119 112</td></tr><tr><td colspan="8">Heterogeneity: Not applicable</td></tr><tr><td colspan="8">Test for overall effect: Z = 0.45 (P = 0.65)</td></tr><tr><td colspan="8">Test for subgroup differences: Chi² = 0.03, df = 1 (P = 0.87), I² = 0%</td></tr></tbody></table>  |         |                   |                   | Study or Subgroup | Experimental Events | Experimental Total | Control Events | Control Total    | Weight                            | Risk Ratio M-H, Fixed, 95% CI      | Risk Ratio M-H, Fixed, 95% CI | <b>3.3.1 High periostin levels</b> |  |  |  |              |      |        |        | Hanania 2013       | 105 | 128               | 103 | 127 | 100.0% | 1.01 [0.90, 1.14]  |  | Subtotal (95% CI)             |  | 128 |  | 127 | 100.0% | 1.01 [0.90, 1.14]                            |  | Total events: 105 103 |  |  |  |                                   |  |  |  | Heterogeneity: Not applicable |  |              |      |     |        |                    |  | Test for overall effect: Z = 0.19 (P = 0.85) |  |  |        |                    |  |                               |  | <b>3.3.2 Low periostin levels</b> |  |  |  |                                              |  |  |  | Hanania 2013 | 119 | 142                                                                    | 112 | 137 | 100.0% | 1.03 [0.92, 1.14] |  | Subtotal (95% CI) |  | 142 |  | 137 | 100.0% | 1.03 [0.92, 1.14] |  | Total events: 119 112 |  |  |  |  |  |  |  | Heterogeneity: Not applicable |  |  |  |  |  |  |  | Test for overall effect: Z = 0.45 (P = 0.65) |  |  |  |  |  |  |  | Test for subgroup differences: Chi² = 0.03, df = 1 (P = 0.87), I² = 0% |  |  |  |  |  |  |  | ⊕⊕○○<br>LOW |  |
| Study or Subgroup                                                                                   | Experimental Events | Experimental Total   | Control Events | Control Total      | Weight                            | Risk Ratio M-H, Fixed, 95% CI | Risk Ratio M-H, Fixed, 95% CI                                                                                                                                                                                                                                                                                                                                                                                                                                                                                                                                                                                                                                                                                                                                                                                                                                                                                                                                                                                                                                                                                                                                                                                                                                                                                                                                                                                                                                                                                                                                                                                                                                                                                                                                                                                                                     |         |                   |                   |                   |                     |                    |                |                  |                                   |                                    |                               |                                    |  |  |  |              |      |        |        |                    |     |                   |     |     |        |                    |  |                               |  |     |  |     |        |                                              |  |                       |  |  |  |                                   |  |  |  |                               |  |              |      |     |        |                    |  |                                              |  |  |        |                    |  |                               |  |                                   |  |  |  |                                              |  |  |  |              |     |                                                                        |     |     |        |                   |  |                   |  |     |  |     |        |                   |  |                       |  |  |  |  |  |  |  |                               |  |  |  |  |  |  |  |                                              |  |  |  |  |  |  |  |                                                                        |  |  |  |  |  |  |  |             |  |
| <b>3.3.1 High periostin levels</b>                                                                  |                     |                      |                |                    |                                   |                               |                                                                                                                                                                                                                                                                                                                                                                                                                                                                                                                                                                                                                                                                                                                                                                                                                                                                                                                                                                                                                                                                                                                                                                                                                                                                                                                                                                                                                                                                                                                                                                                                                                                                                                                                                                                                                                                   |         |                   |                   |                   |                     |                    |                |                  |                                   |                                    |                               |                                    |  |  |  |              |      |        |        |                    |     |                   |     |     |        |                    |  |                               |  |     |  |     |        |                                              |  |                       |  |  |  |                                   |  |  |  |                               |  |              |      |     |        |                    |  |                                              |  |  |        |                    |  |                               |  |                                   |  |  |  |                                              |  |  |  |              |     |                                                                        |     |     |        |                   |  |                   |  |     |  |     |        |                   |  |                       |  |  |  |  |  |  |  |                               |  |  |  |  |  |  |  |                                              |  |  |  |  |  |  |  |                                                                        |  |  |  |  |  |  |  |             |  |
| Hanania 2013                                                                                        | 105                 | 128                  | 103            | 127                | 100.0%                            | 1.01 [0.90, 1.14]             |                                                                                                                                                                                                                                                                                                                                                                                                                                                                                                                                                                                                                                                                                                                                                                                                                                                                                                                                                                                                                                                                                                                                                                                                                                                                                                                                                                                                                                                                                                                                                                                                                                                                                                                                                                                                                                                   |         |                   |                   |                   |                     |                    |                |                  |                                   |                                    |                               |                                    |  |  |  |              |      |        |        |                    |     |                   |     |     |        |                    |  |                               |  |     |  |     |        |                                              |  |                       |  |  |  |                                   |  |  |  |                               |  |              |      |     |        |                    |  |                                              |  |  |        |                    |  |                               |  |                                   |  |  |  |                                              |  |  |  |              |     |                                                                        |     |     |        |                   |  |                   |  |     |  |     |        |                   |  |                       |  |  |  |  |  |  |  |                               |  |  |  |  |  |  |  |                                              |  |  |  |  |  |  |  |                                                                        |  |  |  |  |  |  |  |             |  |
| Subtotal (95% CI)                                                                                   |                     | 128                  |                | 127                | 100.0%                            | 1.01 [0.90, 1.14]             |                                                                                                                                                                                                                                                                                                                                                                                                                                                                                                                                                                                                                                                                                                                                                                                                                                                                                                                                                                                                                                                                                                                                                                                                                                                                                                                                                                                                                                                                                                                                                                                                                                                                                                                                                                                                                                                   |         |                   |                   |                   |                     |                    |                |                  |                                   |                                    |                               |                                    |  |  |  |              |      |        |        |                    |     |                   |     |     |        |                    |  |                               |  |     |  |     |        |                                              |  |                       |  |  |  |                                   |  |  |  |                               |  |              |      |     |        |                    |  |                                              |  |  |        |                    |  |                               |  |                                   |  |  |  |                                              |  |  |  |              |     |                                                                        |     |     |        |                   |  |                   |  |     |  |     |        |                   |  |                       |  |  |  |  |  |  |  |                               |  |  |  |  |  |  |  |                                              |  |  |  |  |  |  |  |                                                                        |  |  |  |  |  |  |  |             |  |
| Total events: 105 103                                                                               |                     |                      |                |                    |                                   |                               |                                                                                                                                                                                                                                                                                                                                                                                                                                                                                                                                                                                                                                                                                                                                                                                                                                                                                                                                                                                                                                                                                                                                                                                                                                                                                                                                                                                                                                                                                                                                                                                                                                                                                                                                                                                                                                                   |         |                   |                   |                   |                     |                    |                |                  |                                   |                                    |                               |                                    |  |  |  |              |      |        |        |                    |     |                   |     |     |        |                    |  |                               |  |     |  |     |        |                                              |  |                       |  |  |  |                                   |  |  |  |                               |  |              |      |     |        |                    |  |                                              |  |  |        |                    |  |                               |  |                                   |  |  |  |                                              |  |  |  |              |     |                                                                        |     |     |        |                   |  |                   |  |     |  |     |        |                   |  |                       |  |  |  |  |  |  |  |                               |  |  |  |  |  |  |  |                                              |  |  |  |  |  |  |  |                                                                        |  |  |  |  |  |  |  |             |  |
| Heterogeneity: Not applicable                                                                       |                     |                      |                |                    |                                   |                               |                                                                                                                                                                                                                                                                                                                                                                                                                                                                                                                                                                                                                                                                                                                                                                                                                                                                                                                                                                                                                                                                                                                                                                                                                                                                                                                                                                                                                                                                                                                                                                                                                                                                                                                                                                                                                                                   |         |                   |                   |                   |                     |                    |                |                  |                                   |                                    |                               |                                    |  |  |  |              |      |        |        |                    |     |                   |     |     |        |                    |  |                               |  |     |  |     |        |                                              |  |                       |  |  |  |                                   |  |  |  |                               |  |              |      |     |        |                    |  |                                              |  |  |        |                    |  |                               |  |                                   |  |  |  |                                              |  |  |  |              |     |                                                                        |     |     |        |                   |  |                   |  |     |  |     |        |                   |  |                       |  |  |  |  |  |  |  |                               |  |  |  |  |  |  |  |                                              |  |  |  |  |  |  |  |                                                                        |  |  |  |  |  |  |  |             |  |
| Test for overall effect: Z = 0.19 (P = 0.85)                                                        |                     |                      |                |                    |                                   |                               |                                                                                                                                                                                                                                                                                                                                                                                                                                                                                                                                                                                                                                                                                                                                                                                                                                                                                                                                                                                                                                                                                                                                                                                                                                                                                                                                                                                                                                                                                                                                                                                                                                                                                                                                                                                                                                                   |         |                   |                   |                   |                     |                    |                |                  |                                   |                                    |                               |                                    |  |  |  |              |      |        |        |                    |     |                   |     |     |        |                    |  |                               |  |     |  |     |        |                                              |  |                       |  |  |  |                                   |  |  |  |                               |  |              |      |     |        |                    |  |                                              |  |  |        |                    |  |                               |  |                                   |  |  |  |                                              |  |  |  |              |     |                                                                        |     |     |        |                   |  |                   |  |     |  |     |        |                   |  |                       |  |  |  |  |  |  |  |                               |  |  |  |  |  |  |  |                                              |  |  |  |  |  |  |  |                                                                        |  |  |  |  |  |  |  |             |  |
| <b>3.3.2 Low periostin levels</b>                                                                   |                     |                      |                |                    |                                   |                               |                                                                                                                                                                                                                                                                                                                                                                                                                                                                                                                                                                                                                                                                                                                                                                                                                                                                                                                                                                                                                                                                                                                                                                                                                                                                                                                                                                                                                                                                                                                                                                                                                                                                                                                                                                                                                                                   |         |                   |                   |                   |                     |                    |                |                  |                                   |                                    |                               |                                    |  |  |  |              |      |        |        |                    |     |                   |     |     |        |                    |  |                               |  |     |  |     |        |                                              |  |                       |  |  |  |                                   |  |  |  |                               |  |              |      |     |        |                    |  |                                              |  |  |        |                    |  |                               |  |                                   |  |  |  |                                              |  |  |  |              |     |                                                                        |     |     |        |                   |  |                   |  |     |  |     |        |                   |  |                       |  |  |  |  |  |  |  |                               |  |  |  |  |  |  |  |                                              |  |  |  |  |  |  |  |                                                                        |  |  |  |  |  |  |  |             |  |
| Hanania 2013                                                                                        | 119                 | 142                  | 112            | 137                | 100.0%                            | 1.03 [0.92, 1.14]             |                                                                                                                                                                                                                                                                                                                                                                                                                                                                                                                                                                                                                                                                                                                                                                                                                                                                                                                                                                                                                                                                                                                                                                                                                                                                                                                                                                                                                                                                                                                                                                                                                                                                                                                                                                                                                                                   |         |                   |                   |                   |                     |                    |                |                  |                                   |                                    |                               |                                    |  |  |  |              |      |        |        |                    |     |                   |     |     |        |                    |  |                               |  |     |  |     |        |                                              |  |                       |  |  |  |                                   |  |  |  |                               |  |              |      |     |        |                    |  |                                              |  |  |        |                    |  |                               |  |                                   |  |  |  |                                              |  |  |  |              |     |                                                                        |     |     |        |                   |  |                   |  |     |  |     |        |                   |  |                       |  |  |  |  |  |  |  |                               |  |  |  |  |  |  |  |                                              |  |  |  |  |  |  |  |                                                                        |  |  |  |  |  |  |  |             |  |
| Subtotal (95% CI)                                                                                   |                     | 142                  |                | 137                | 100.0%                            | 1.03 [0.92, 1.14]             |                                                                                                                                                                                                                                                                                                                                                                                                                                                                                                                                                                                                                                                                                                                                                                                                                                                                                                                                                                                                                                                                                                                                                                                                                                                                                                                                                                                                                                                                                                                                                                                                                                                                                                                                                                                                                                                   |         |                   |                   |                   |                     |                    |                |                  |                                   |                                    |                               |                                    |  |  |  |              |      |        |        |                    |     |                   |     |     |        |                    |  |                               |  |     |  |     |        |                                              |  |                       |  |  |  |                                   |  |  |  |                               |  |              |      |     |        |                    |  |                                              |  |  |        |                    |  |                               |  |                                   |  |  |  |                                              |  |  |  |              |     |                                                                        |     |     |        |                   |  |                   |  |     |  |     |        |                   |  |                       |  |  |  |  |  |  |  |                               |  |  |  |  |  |  |  |                                              |  |  |  |  |  |  |  |                                                                        |  |  |  |  |  |  |  |             |  |
| Total events: 119 112                                                                               |                     |                      |                |                    |                                   |                               |                                                                                                                                                                                                                                                                                                                                                                                                                                                                                                                                                                                                                                                                                                                                                                                                                                                                                                                                                                                                                                                                                                                                                                                                                                                                                                                                                                                                                                                                                                                                                                                                                                                                                                                                                                                                                                                   |         |                   |                   |                   |                     |                    |                |                  |                                   |                                    |                               |                                    |  |  |  |              |      |        |        |                    |     |                   |     |     |        |                    |  |                               |  |     |  |     |        |                                              |  |                       |  |  |  |                                   |  |  |  |                               |  |              |      |     |        |                    |  |                                              |  |  |        |                    |  |                               |  |                                   |  |  |  |                                              |  |  |  |              |     |                                                                        |     |     |        |                   |  |                   |  |     |  |     |        |                   |  |                       |  |  |  |  |  |  |  |                               |  |  |  |  |  |  |  |                                              |  |  |  |  |  |  |  |                                                                        |  |  |  |  |  |  |  |             |  |
| Heterogeneity: Not applicable                                                                       |                     |                      |                |                    |                                   |                               |                                                                                                                                                                                                                                                                                                                                                                                                                                                                                                                                                                                                                                                                                                                                                                                                                                                                                                                                                                                                                                                                                                                                                                                                                                                                                                                                                                                                                                                                                                                                                                                                                                                                                                                                                                                                                                                   |         |                   |                   |                   |                     |                    |                |                  |                                   |                                    |                               |                                    |  |  |  |              |      |        |        |                    |     |                   |     |     |        |                    |  |                               |  |     |  |     |        |                                              |  |                       |  |  |  |                                   |  |  |  |                               |  |              |      |     |        |                    |  |                                              |  |  |        |                    |  |                               |  |                                   |  |  |  |                                              |  |  |  |              |     |                                                                        |     |     |        |                   |  |                   |  |     |  |     |        |                   |  |                       |  |  |  |  |  |  |  |                               |  |  |  |  |  |  |  |                                              |  |  |  |  |  |  |  |                                                                        |  |  |  |  |  |  |  |             |  |
| Test for overall effect: Z = 0.45 (P = 0.65)                                                        |                     |                      |                |                    |                                   |                               |                                                                                                                                                                                                                                                                                                                                                                                                                                                                                                                                                                                                                                                                                                                                                                                                                                                                                                                                                                                                                                                                                                                                                                                                                                                                                                                                                                                                                                                                                                                                                                                                                                                                                                                                                                                                                                                   |         |                   |                   |                   |                     |                    |                |                  |                                   |                                    |                               |                                    |  |  |  |              |      |        |        |                    |     |                   |     |     |        |                    |  |                               |  |     |  |     |        |                                              |  |                       |  |  |  |                                   |  |  |  |                               |  |              |      |     |        |                    |  |                                              |  |  |        |                    |  |                               |  |                                   |  |  |  |                                              |  |  |  |              |     |                                                                        |     |     |        |                   |  |                   |  |     |  |     |        |                   |  |                       |  |  |  |  |  |  |  |                               |  |  |  |  |  |  |  |                                              |  |  |  |  |  |  |  |                                                                        |  |  |  |  |  |  |  |             |  |
| Test for subgroup differences: Chi² = 0.03, df = 1 (P = 0.87), I² = 0%                              |                     |                      |                |                    |                                   |                               |                                                                                                                                                                                                                                                                                                                                                                                                                                                                                                                                                                                                                                                                                                                                                                                                                                                                                                                                                                                                                                                                                                                                                                                                                                                                                                                                                                                                                                                                                                                                                                                                                                                                                                                                                                                                                                                   |         |                   |                   |                   |                     |                    |                |                  |                                   |                                    |                               |                                    |  |  |  |              |      |        |        |                    |     |                   |     |     |        |                    |  |                               |  |     |  |     |        |                                              |  |                       |  |  |  |                                   |  |  |  |                               |  |              |      |     |        |                    |  |                                              |  |  |        |                    |  |                               |  |                                   |  |  |  |                                              |  |  |  |              |     |                                                                        |     |     |        |                   |  |                   |  |     |  |     |        |                   |  |                       |  |  |  |  |  |  |  |                               |  |  |  |  |  |  |  |                                              |  |  |  |  |  |  |  |                                                                        |  |  |  |  |  |  |  |             |  |
| Time to first protocol asthma exacerbation<br>Follow up: 48 weeks<br>(lower values, better outcome) |                     |                      |                |                    |                                   |                               |                                                                                                                                                                                                                                                                                                                                                                                                                                                                                                                                                                                                                                                                                                                                                                                                                                                                                                                                                                                                                                                                                                                                                                                                                                                                                                                                                                                                                                                                                                                                                                                                                                                                                                                                                                                                                                                   |         |                   |                   |                   |                     |                    |                |                  |                                   |                                    |                               |                                    |  |  |  |              |      |        |        |                    |     |                   |     |     |        |                    |  |                               |  |     |  |     |        |                                              |  |                       |  |  |  |                                   |  |  |  |                               |  |              |      |     |        |                    |  |                                              |  |  |        |                    |  |                               |  |                                   |  |  |  |                                              |  |  |  |              |     |                                                                        |     |     |        |                   |  |                   |  |     |  |     |        |                   |  |                       |  |  |  |  |  |  |  |                               |  |  |  |  |  |  |  |                                              |  |  |  |  |  |  |  |                                                                        |  |  |  |  |  |  |  |             |  |

| Certainty assessment              |                   |                      |               |              |                      |                      | No of patients                                                                                                                                                                                                                                     |         | Effect                                                                             |                   | Certainty   | Importance |
|-----------------------------------|-------------------|----------------------|---------------|--------------|----------------------|----------------------|----------------------------------------------------------------------------------------------------------------------------------------------------------------------------------------------------------------------------------------------------|---------|------------------------------------------------------------------------------------|-------------------|-------------|------------|
| No of studies                     | Study design      | Risk of bias         | Inconsistency | Indirectness | Imprecision          | Other considerations | omalizumab                                                                                                                                                                                                                                         | placebo | Relative (95% CI)                                                                  | Absolute (95% CI) |             |            |
| 1 (534 participants) <sup>1</sup> | randomised trials | serious <sup>a</sup> | not serious   | not serious  | serious <sup>b</sup> | none                 | Time to first asthma exacerbation of omalizumab compared to placebo were: Periostin (≥50 ng/ml): HR= 0.72 (95% CI= 0.49 to 1.1) Periostin(<50 ng/ml): HR= 1.1 (95% CI= 0.77 to 1.6) Number of patients: 534; test for subgroup differences: P=0.11 |         | 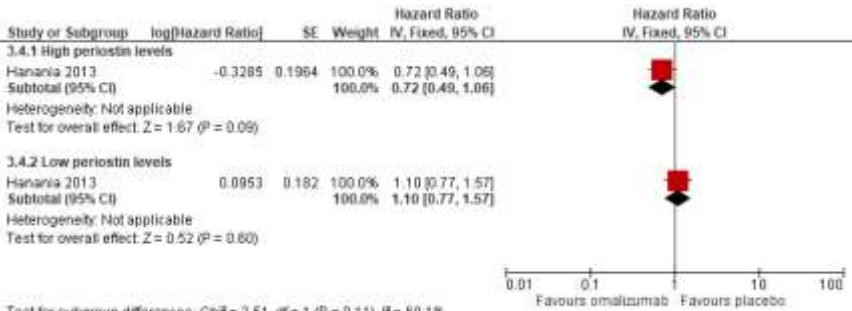 |                   | ⊕⊕○○<br>LOW |            |

CI: Confidence interval

## Explanations

- a. Risk of bias due to a considerable number of patients was not evaluated at baseline for biomarker levels
- b. Optimal information size not reached for the main objective (and then for the subgroup analysis), reported by authors
- c. P values about Test for subgroup differences were estimated in RevMan and assuming that LSM is similar to Mean differences (just for descriptive purposes)

## References

1. Hanania NA<sup>1</sup>, Wenzel S, Rosén K, Hsieh HJ, Mosesova S, Choy DF, Lal P, Arron JR, Harris JM, Busse W. Exploring the effects of omalizumab in allergic asthma: an analysis of biomarkers in the EXTRA study. Am J Respir Crit Care Med; 2013.

**GRADE Evidence Profile: OMALIZUMAB - EOSINOPHIL**

| Certainty assessment                                                                                        |                   |                        |               |              |                      |                      | № of patients                                                                                                                                                                                                                                                                                                                                                           |         | Effect            |                   | Certainty                                                                                  | Importance |
|-------------------------------------------------------------------------------------------------------------|-------------------|------------------------|---------------|--------------|----------------------|----------------------|-------------------------------------------------------------------------------------------------------------------------------------------------------------------------------------------------------------------------------------------------------------------------------------------------------------------------------------------------------------------------|---------|-------------------|-------------------|--------------------------------------------------------------------------------------------|------------|
| № of studies                                                                                                | Study design      | Risk of bias           | Inconsistency | Indirectness | Imprecision          | Other considerations | Omalizumab                                                                                                                                                                                                                                                                                                                                                              | placebo | Relative (95% CI) | Absolute (95% CI) |                                                                                            |            |
| Exacerbation rates per patient<br>Follow up: 24 weeks<br>(lower rates, better reduction)                    |                   |                        |               |              |                      |                      |                                                                                                                                                                                                                                                                                                                                                                         |         |                   |                   |                                                                                            |            |
| 1 (217 participants)<br>1                                                                                   | randomised trials | serious <sup>a</sup>   | not serious   | not serious  | serious <sup>b</sup> | none                 | <p>Exacerbation rate of omalizumab compared to placebo were: Eosinophil (≥300/uL): 0.25 vs 0.59, Rate ratio 0.41 (95%CI 0.20 to 0.82) Eosinophil (&lt;300/uL): 0.17 vs 0.16, Rate ratio 1.07 (95%CI 0.45 to 2.53) Number of patients: 217; test for subgroup differences, p=0.09</p> 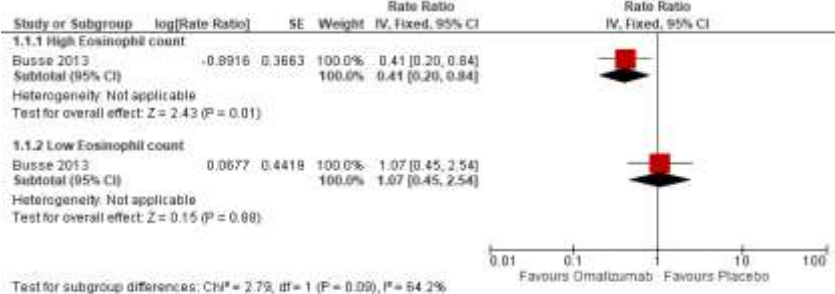 |         |                   |                   | <br>LOW |            |
| Reduction in exacerbation rates per patient<br>Follow up: 48 weeks<br>(higher percentage, better reduction) |                   |                        |               |              |                      |                      |                                                                                                                                                                                                                                                                                                                                                                         |         |                   |                   |                                                                                            |            |
| 1 (797 participants)<br>2                                                                                   | randomised trials | serious <sup>a,c</sup> | not serious   | not serious  | serious <sup>b</sup> | none                 | <p>Relative reduction in exacerbation rate of omalizumab compared to placebo were: Eosinophil (≥260/uL): 32% (95% CI: 11 to 48); p-value= 0.005 Eosinophil (&lt;260/uL): 9% (95% CI: -24 to 34); p-value= 0.54 Number of patients: 797; test for subgroup differences: no available</p>                                                                                 |         |                   |                   | <br>LOW |            |
| At least one exacerbation<br>Follow up: 24 weeks<br>(lower rates, better outcome)                           |                   |                        |               |              |                      |                      |                                                                                                                                                                                                                                                                                                                                                                         |         |                   |                   |                                                                                            |            |

| Certainty assessment                                                                                                                                                                     |                   |                      |               |              |                      |                      | № of patients                                                                                                                                                                                                                                                                                                                                                                                                                                                                                                                                      |         | Effect            |                   | Certainty   | Importance |
|------------------------------------------------------------------------------------------------------------------------------------------------------------------------------------------|-------------------|----------------------|---------------|--------------|----------------------|----------------------|----------------------------------------------------------------------------------------------------------------------------------------------------------------------------------------------------------------------------------------------------------------------------------------------------------------------------------------------------------------------------------------------------------------------------------------------------------------------------------------------------------------------------------------------------|---------|-------------------|-------------------|-------------|------------|
| № of studies                                                                                                                                                                             | Study design      | Risk of bias         | Inconsistency | Indirectness | Imprecision          | Other considerations | Omalizumab                                                                                                                                                                                                                                                                                                                                                                                                                                                                                                                                         | placebo | Relative (95% CI) | Absolute (95% CI) |             |            |
| 1 (217 participants) <sup>1</sup>                                                                                                                                                        | randomised trials | serious <sup>a</sup> | not serious   | not serious  | serious <sup>b</sup> | none                 | <p>Exacerbation rate of omalizumab compared to placebo were: Eosinophil (≥300/uL): Risk ratio 0.52 (95%CI 0.26 to 1.04) Eosinophil (&lt;300/uL): Risk ratio 1.00 (95%CI 0.42 to 2.36) Number of patients: 217; test for subgroup differences, p=0.25</p> 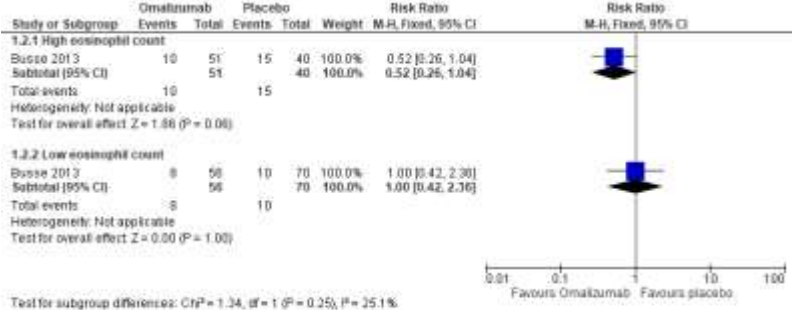 <p>Test for subgroup differences: Chi<sup>2</sup> = 1.34, df = 1 (P = 0.25), I<sup>2</sup> = 25.1%</p>                                                                                                 |         |                   |                   | ⊕⊕○○<br>LOW |            |
| Relative change from baseline to week 24 in % predicted FEV1<br>(higher change, better outcome)<br>Follow up: 24 weeks                                                                   |                   |                      |               |              |                      |                      |                                                                                                                                                                                                                                                                                                                                                                                                                                                                                                                                                    |         |                   |                   |             |            |
| 1 (217 participants) <sup>1</sup>                                                                                                                                                        | randomised trials | serious <sup>a</sup> | not serious   | not serious  | serious <sup>b</sup> | none                 | <p>Relative change in % predicted FEV1 when omalizumab is compared to placebo were: Eosinophil (≥300/uL): Least squares mean treatment (ANOVA): 7.35% (95% CI: 1.38 to 13.31) Eosinophil (&lt;300/uL): Least squares mean treatment (ANOVA): 3.67% (95% CI: -0.46 to 7.81) Number of patients: 217; test for subgroup differences: P= 0.32<sup>d</sup></p>  <p>Test for subgroup differences: Chi<sup>2</sup> = 0.99, df = 1 (P = 0.32), I<sup>2</sup> = 0%</p> |         |                   |                   | ⊕⊕○○<br>LOW |            |
| Change from baseline in Asthma Quality of Life Questionnaire (AQLQ)<br>Follow up: 48 weeks<br>7-point scale (7 = not impaired at all - 1 = severely impaired; higher values, better QoL) |                   |                      |               |              |                      |                      |                                                                                                                                                                                                                                                                                                                                                                                                                                                                                                                                                    |         |                   |                   |             |            |

| Certainty assessment                                                                                              |                   |                        |               |                                   |                      |                      | No of patients                                                                                                                                                                                                                                                                                                                                                                                                                                                                                                                                                                                                                                                                                                                                                                                                                                                                                                                                                                                                                                                                                                                                                                                                                                                                                                                                                                                                                                                  |         | Effect            |                   | Certainty         | Importance      |    |        |                                   |                                    |  |  |  |  |              |      |        |        |                    |                   |  |  |        |                    |                               |  |  |  |  |                                              |  |  |  |  |                                   |  |  |  |  |              |      |        |        |                    |                   |  |  |        |                    |                               |  |  |  |  |                                              |  |  |  |  |                        |  |
|-------------------------------------------------------------------------------------------------------------------|-------------------|------------------------|---------------|-----------------------------------|----------------------|----------------------|-----------------------------------------------------------------------------------------------------------------------------------------------------------------------------------------------------------------------------------------------------------------------------------------------------------------------------------------------------------------------------------------------------------------------------------------------------------------------------------------------------------------------------------------------------------------------------------------------------------------------------------------------------------------------------------------------------------------------------------------------------------------------------------------------------------------------------------------------------------------------------------------------------------------------------------------------------------------------------------------------------------------------------------------------------------------------------------------------------------------------------------------------------------------------------------------------------------------------------------------------------------------------------------------------------------------------------------------------------------------------------------------------------------------------------------------------------------------|---------|-------------------|-------------------|-------------------|-----------------|----|--------|-----------------------------------|------------------------------------|--|--|--|--|--------------|------|--------|--------|--------------------|-------------------|--|--|--------|--------------------|-------------------------------|--|--|--|--|----------------------------------------------|--|--|--|--|-----------------------------------|--|--|--|--|--------------|------|--------|--------|--------------------|-------------------|--|--|--------|--------------------|-------------------------------|--|--|--|--|----------------------------------------------|--|--|--|--|------------------------|--|
| No of studies                                                                                                     | Study design      | Risk of bias           | Inconsistency | Indirectness                      | Imprecision          | Other considerations | Omalizumab                                                                                                                                                                                                                                                                                                                                                                                                                                                                                                                                                                                                                                                                                                                                                                                                                                                                                                                                                                                                                                                                                                                                                                                                                                                                                                                                                                                                                                                      | placebo | Relative (95% CI) | Absolute (95% CI) |                   |                 |    |        |                                   |                                    |  |  |  |  |              |      |        |        |                    |                   |  |  |        |                    |                               |  |  |  |  |                                              |  |  |  |  |                                   |  |  |  |  |              |      |        |        |                    |                   |  |  |        |                    |                               |  |  |  |  |                                              |  |  |  |  |                        |  |
| 1 (797 participants) <sup>2</sup>                                                                                 | randomised trials | serious <sup>a,c</sup> | not serious   | not serious                       | serious <sup>b</sup> | none                 | <p>Mean change from baseline to week 48 of omalizumab compared to placebo were: Eosinophil (≥260/uL): Least square mean difference= 0.14 (95% CI: -0.11 to 0.36); p-value= 0.29 Eosinophil (&lt;260/uL): Least square mean difference= 0.26 (95% CI: 0.06 to 0.51); p-value= 0.01 Number of patients: 797; test for subgroup differences: P= 0.46<sup>d</sup></p> <table><thead><tr><th>Study or Subgroup</th><th>Mean Difference</th><th>SE</th><th>Weight</th><th>Mean Difference IV, Fixed, 95% CI</th></tr></thead><tbody><tr><td colspan="5"><b>1.4.1 High eosinophil count</b></td></tr><tr><td>Hanania 2013</td><td>0.14</td><td>0.1276</td><td>100.0%</td><td>0.14 [-0.11, 0.39]</td></tr><tr><td>Subtotal (95% CI)</td><td></td><td></td><td>100.0%</td><td>0.14 [-0.11, 0.39]</td></tr><tr><td colspan="5">Heterogeneity: Not applicable</td></tr><tr><td colspan="5">Test for overall effect: Z = 1.10 (P = 0.27)</td></tr><tr><td colspan="5"><b>1.4.2 Low eosinophil count</b></td></tr><tr><td>Hanania 2013</td><td>0.26</td><td>0.102</td><td>100.0%</td><td>0.26 [0.06, 0.46]</td></tr><tr><td>Subtotal (95% CI)</td><td></td><td></td><td>100.0%</td><td>0.26 [0.06, 0.46]</td></tr><tr><td colspan="5">Heterogeneity: Not applicable</td></tr><tr><td colspan="5">Test for overall effect: Z = 2.55 (P = 0.01)</td></tr></tbody></table> <p>Test for subgroup differences: Chi<sup>2</sup> = 0.54, df = 1 (P = 0.46), I<sup>2</sup> = 0%</p>  |         |                   |                   | Study or Subgroup | Mean Difference | SE | Weight | Mean Difference IV, Fixed, 95% CI | <b>1.4.1 High eosinophil count</b> |  |  |  |  | Hanania 2013 | 0.14 | 0.1276 | 100.0% | 0.14 [-0.11, 0.39] | Subtotal (95% CI) |  |  | 100.0% | 0.14 [-0.11, 0.39] | Heterogeneity: Not applicable |  |  |  |  | Test for overall effect: Z = 1.10 (P = 0.27) |  |  |  |  | <b>1.4.2 Low eosinophil count</b> |  |  |  |  | Hanania 2013 | 0.26 | 0.102  | 100.0% | 0.26 [0.06, 0.46]  | Subtotal (95% CI) |  |  | 100.0% | 0.26 [0.06, 0.46]  | Heterogeneity: Not applicable |  |  |  |  | Test for overall effect: Z = 2.55 (P = 0.01) |  |  |  |  | <p>⊕⊕○○</p> <p>LOW</p> |  |
| Study or Subgroup                                                                                                 | Mean Difference   | SE                     | Weight        | Mean Difference IV, Fixed, 95% CI |                      |                      |                                                                                                                                                                                                                                                                                                                                                                                                                                                                                                                                                                                                                                                                                                                                                                                                                                                                                                                                                                                                                                                                                                                                                                                                                                                                                                                                                                                                                                                                 |         |                   |                   |                   |                 |    |        |                                   |                                    |  |  |  |  |              |      |        |        |                    |                   |  |  |        |                    |                               |  |  |  |  |                                              |  |  |  |  |                                   |  |  |  |  |              |      |        |        |                    |                   |  |  |        |                    |                               |  |  |  |  |                                              |  |  |  |  |                        |  |
| <b>1.4.1 High eosinophil count</b>                                                                                |                   |                        |               |                                   |                      |                      |                                                                                                                                                                                                                                                                                                                                                                                                                                                                                                                                                                                                                                                                                                                                                                                                                                                                                                                                                                                                                                                                                                                                                                                                                                                                                                                                                                                                                                                                 |         |                   |                   |                   |                 |    |        |                                   |                                    |  |  |  |  |              |      |        |        |                    |                   |  |  |        |                    |                               |  |  |  |  |                                              |  |  |  |  |                                   |  |  |  |  |              |      |        |        |                    |                   |  |  |        |                    |                               |  |  |  |  |                                              |  |  |  |  |                        |  |
| Hanania 2013                                                                                                      | 0.14              | 0.1276                 | 100.0%        | 0.14 [-0.11, 0.39]                |                      |                      |                                                                                                                                                                                                                                                                                                                                                                                                                                                                                                                                                                                                                                                                                                                                                                                                                                                                                                                                                                                                                                                                                                                                                                                                                                                                                                                                                                                                                                                                 |         |                   |                   |                   |                 |    |        |                                   |                                    |  |  |  |  |              |      |        |        |                    |                   |  |  |        |                    |                               |  |  |  |  |                                              |  |  |  |  |                                   |  |  |  |  |              |      |        |        |                    |                   |  |  |        |                    |                               |  |  |  |  |                                              |  |  |  |  |                        |  |
| Subtotal (95% CI)                                                                                                 |                   |                        | 100.0%        | 0.14 [-0.11, 0.39]                |                      |                      |                                                                                                                                                                                                                                                                                                                                                                                                                                                                                                                                                                                                                                                                                                                                                                                                                                                                                                                                                                                                                                                                                                                                                                                                                                                                                                                                                                                                                                                                 |         |                   |                   |                   |                 |    |        |                                   |                                    |  |  |  |  |              |      |        |        |                    |                   |  |  |        |                    |                               |  |  |  |  |                                              |  |  |  |  |                                   |  |  |  |  |              |      |        |        |                    |                   |  |  |        |                    |                               |  |  |  |  |                                              |  |  |  |  |                        |  |
| Heterogeneity: Not applicable                                                                                     |                   |                        |               |                                   |                      |                      |                                                                                                                                                                                                                                                                                                                                                                                                                                                                                                                                                                                                                                                                                                                                                                                                                                                                                                                                                                                                                                                                                                                                                                                                                                                                                                                                                                                                                                                                 |         |                   |                   |                   |                 |    |        |                                   |                                    |  |  |  |  |              |      |        |        |                    |                   |  |  |        |                    |                               |  |  |  |  |                                              |  |  |  |  |                                   |  |  |  |  |              |      |        |        |                    |                   |  |  |        |                    |                               |  |  |  |  |                                              |  |  |  |  |                        |  |
| Test for overall effect: Z = 1.10 (P = 0.27)                                                                      |                   |                        |               |                                   |                      |                      |                                                                                                                                                                                                                                                                                                                                                                                                                                                                                                                                                                                                                                                                                                                                                                                                                                                                                                                                                                                                                                                                                                                                                                                                                                                                                                                                                                                                                                                                 |         |                   |                   |                   |                 |    |        |                                   |                                    |  |  |  |  |              |      |        |        |                    |                   |  |  |        |                    |                               |  |  |  |  |                                              |  |  |  |  |                                   |  |  |  |  |              |      |        |        |                    |                   |  |  |        |                    |                               |  |  |  |  |                                              |  |  |  |  |                        |  |
| <b>1.4.2 Low eosinophil count</b>                                                                                 |                   |                        |               |                                   |                      |                      |                                                                                                                                                                                                                                                                                                                                                                                                                                                                                                                                                                                                                                                                                                                                                                                                                                                                                                                                                                                                                                                                                                                                                                                                                                                                                                                                                                                                                                                                 |         |                   |                   |                   |                 |    |        |                                   |                                    |  |  |  |  |              |      |        |        |                    |                   |  |  |        |                    |                               |  |  |  |  |                                              |  |  |  |  |                                   |  |  |  |  |              |      |        |        |                    |                   |  |  |        |                    |                               |  |  |  |  |                                              |  |  |  |  |                        |  |
| Hanania 2013                                                                                                      | 0.26              | 0.102                  | 100.0%        | 0.26 [0.06, 0.46]                 |                      |                      |                                                                                                                                                                                                                                                                                                                                                                                                                                                                                                                                                                                                                                                                                                                                                                                                                                                                                                                                                                                                                                                                                                                                                                                                                                                                                                                                                                                                                                                                 |         |                   |                   |                   |                 |    |        |                                   |                                    |  |  |  |  |              |      |        |        |                    |                   |  |  |        |                    |                               |  |  |  |  |                                              |  |  |  |  |                                   |  |  |  |  |              |      |        |        |                    |                   |  |  |        |                    |                               |  |  |  |  |                                              |  |  |  |  |                        |  |
| Subtotal (95% CI)                                                                                                 |                   |                        | 100.0%        | 0.26 [0.06, 0.46]                 |                      |                      |                                                                                                                                                                                                                                                                                                                                                                                                                                                                                                                                                                                                                                                                                                                                                                                                                                                                                                                                                                                                                                                                                                                                                                                                                                                                                                                                                                                                                                                                 |         |                   |                   |                   |                 |    |        |                                   |                                    |  |  |  |  |              |      |        |        |                    |                   |  |  |        |                    |                               |  |  |  |  |                                              |  |  |  |  |                                   |  |  |  |  |              |      |        |        |                    |                   |  |  |        |                    |                               |  |  |  |  |                                              |  |  |  |  |                        |  |
| Heterogeneity: Not applicable                                                                                     |                   |                        |               |                                   |                      |                      |                                                                                                                                                                                                                                                                                                                                                                                                                                                                                                                                                                                                                                                                                                                                                                                                                                                                                                                                                                                                                                                                                                                                                                                                                                                                                                                                                                                                                                                                 |         |                   |                   |                   |                 |    |        |                                   |                                    |  |  |  |  |              |      |        |        |                    |                   |  |  |        |                    |                               |  |  |  |  |                                              |  |  |  |  |                                   |  |  |  |  |              |      |        |        |                    |                   |  |  |        |                    |                               |  |  |  |  |                                              |  |  |  |  |                        |  |
| Test for overall effect: Z = 2.55 (P = 0.01)                                                                      |                   |                        |               |                                   |                      |                      |                                                                                                                                                                                                                                                                                                                                                                                                                                                                                                                                                                                                                                                                                                                                                                                                                                                                                                                                                                                                                                                                                                                                                                                                                                                                                                                                                                                                                                                                 |         |                   |                   |                   |                 |    |        |                                   |                                    |  |  |  |  |              |      |        |        |                    |                   |  |  |        |                    |                               |  |  |  |  |                                              |  |  |  |  |                                   |  |  |  |  |              |      |        |        |                    |                   |  |  |        |                    |                               |  |  |  |  |                                              |  |  |  |  |                        |  |
| <p>Change from baseline in % predicted FEV1</p> <p>Follow up: 48 weeks</p> <p>(higher change, better outcome)</p> |                   |                        |               |                                   |                      |                      |                                                                                                                                                                                                                                                                                                                                                                                                                                                                                                                                                                                                                                                                                                                                                                                                                                                                                                                                                                                                                                                                                                                                                                                                                                                                                                                                                                                                                                                                 |         |                   |                   |                   |                 |    |        |                                   |                                    |  |  |  |  |              |      |        |        |                    |                   |  |  |        |                    |                               |  |  |  |  |                                              |  |  |  |  |                                   |  |  |  |  |              |      |        |        |                    |                   |  |  |        |                    |                               |  |  |  |  |                                              |  |  |  |  |                        |  |
| 1 (797 participants) <sup>2</sup>                                                                                 | randomised trials | serious <sup>a,c</sup> | not serious   | not serious                       | serious              | none                 | <p>Mean change from baseline to week 48 of omalizumab compared to placebo were: Eosinophil (≥260/uL): Least square mean difference= 1.3 (95% CI: -1.23 to 3.84); p-value= 0.31 Eosinophil (&lt;260/uL): Least square mean difference= 1.72 (95% CI: -1.06 to 4.51); p-value= 0.02 Number of patients: 797; test for subgroup differences: P=0.83<sup>d</sup></p> <table><thead><tr><th>Study or Subgroup</th><th>Mean Difference</th><th>SE</th><th>Weight</th><th>Mean Difference IV, Fixed, 95% CI</th></tr></thead><tbody><tr><td colspan="5"><b>1.5.1 High eosinophil count</b></td></tr><tr><td>Hanania 2013</td><td>1.3</td><td>1.2908</td><td>100.0%</td><td>1.30 [-1.23, 3.83]</td></tr><tr><td>Subtotal (95% CI)</td><td></td><td></td><td>100.0%</td><td>1.30 [-1.23, 3.83]</td></tr><tr><td colspan="5">Heterogeneity: Not applicable</td></tr><tr><td colspan="5">Test for overall effect: Z = 1.01 (P = 0.31)</td></tr><tr><td colspan="5"><b>1.5.2 Low eosinophil count</b></td></tr><tr><td>Hanania 2013</td><td>1.72</td><td>1.4184</td><td>100.0%</td><td>1.72 [-1.06, 4.50]</td></tr><tr><td>Subtotal (95% CI)</td><td></td><td></td><td>100.0%</td><td>1.72 [-1.06, 4.50]</td></tr><tr><td colspan="5">Heterogeneity: Not applicable</td></tr><tr><td colspan="5">Test for overall effect: Z = 1.21 (P = 0.23)</td></tr></tbody></table> <p>Test for subgroup differences: Chi<sup>2</sup> = 0.05, df = 1 (P = 0.83), I<sup>2</sup> = 0%</p> |         |                   |                   | Study or Subgroup | Mean Difference | SE | Weight | Mean Difference IV, Fixed, 95% CI | <b>1.5.1 High eosinophil count</b> |  |  |  |  | Hanania 2013 | 1.3  | 1.2908 | 100.0% | 1.30 [-1.23, 3.83] | Subtotal (95% CI) |  |  | 100.0% | 1.30 [-1.23, 3.83] | Heterogeneity: Not applicable |  |  |  |  | Test for overall effect: Z = 1.01 (P = 0.31) |  |  |  |  | <b>1.5.2 Low eosinophil count</b> |  |  |  |  | Hanania 2013 | 1.72 | 1.4184 | 100.0% | 1.72 [-1.06, 4.50] | Subtotal (95% CI) |  |  | 100.0% | 1.72 [-1.06, 4.50] | Heterogeneity: Not applicable |  |  |  |  | Test for overall effect: Z = 1.21 (P = 0.23) |  |  |  |  | <p>⊕⊕○○</p> <p>LOW</p> |  |
| Study or Subgroup                                                                                                 | Mean Difference   | SE                     | Weight        | Mean Difference IV, Fixed, 95% CI |                      |                      |                                                                                                                                                                                                                                                                                                                                                                                                                                                                                                                                                                                                                                                                                                                                                                                                                                                                                                                                                                                                                                                                                                                                                                                                                                                                                                                                                                                                                                                                 |         |                   |                   |                   |                 |    |        |                                   |                                    |  |  |  |  |              |      |        |        |                    |                   |  |  |        |                    |                               |  |  |  |  |                                              |  |  |  |  |                                   |  |  |  |  |              |      |        |        |                    |                   |  |  |        |                    |                               |  |  |  |  |                                              |  |  |  |  |                        |  |
| <b>1.5.1 High eosinophil count</b>                                                                                |                   |                        |               |                                   |                      |                      |                                                                                                                                                                                                                                                                                                                                                                                                                                                                                                                                                                                                                                                                                                                                                                                                                                                                                                                                                                                                                                                                                                                                                                                                                                                                                                                                                                                                                                                                 |         |                   |                   |                   |                 |    |        |                                   |                                    |  |  |  |  |              |      |        |        |                    |                   |  |  |        |                    |                               |  |  |  |  |                                              |  |  |  |  |                                   |  |  |  |  |              |      |        |        |                    |                   |  |  |        |                    |                               |  |  |  |  |                                              |  |  |  |  |                        |  |
| Hanania 2013                                                                                                      | 1.3               | 1.2908                 | 100.0%        | 1.30 [-1.23, 3.83]                |                      |                      |                                                                                                                                                                                                                                                                                                                                                                                                                                                                                                                                                                                                                                                                                                                                                                                                                                                                                                                                                                                                                                                                                                                                                                                                                                                                                                                                                                                                                                                                 |         |                   |                   |                   |                 |    |        |                                   |                                    |  |  |  |  |              |      |        |        |                    |                   |  |  |        |                    |                               |  |  |  |  |                                              |  |  |  |  |                                   |  |  |  |  |              |      |        |        |                    |                   |  |  |        |                    |                               |  |  |  |  |                                              |  |  |  |  |                        |  |
| Subtotal (95% CI)                                                                                                 |                   |                        | 100.0%        | 1.30 [-1.23, 3.83]                |                      |                      |                                                                                                                                                                                                                                                                                                                                                                                                                                                                                                                                                                                                                                                                                                                                                                                                                                                                                                                                                                                                                                                                                                                                                                                                                                                                                                                                                                                                                                                                 |         |                   |                   |                   |                 |    |        |                                   |                                    |  |  |  |  |              |      |        |        |                    |                   |  |  |        |                    |                               |  |  |  |  |                                              |  |  |  |  |                                   |  |  |  |  |              |      |        |        |                    |                   |  |  |        |                    |                               |  |  |  |  |                                              |  |  |  |  |                        |  |
| Heterogeneity: Not applicable                                                                                     |                   |                        |               |                                   |                      |                      |                                                                                                                                                                                                                                                                                                                                                                                                                                                                                                                                                                                                                                                                                                                                                                                                                                                                                                                                                                                                                                                                                                                                                                                                                                                                                                                                                                                                                                                                 |         |                   |                   |                   |                 |    |        |                                   |                                    |  |  |  |  |              |      |        |        |                    |                   |  |  |        |                    |                               |  |  |  |  |                                              |  |  |  |  |                                   |  |  |  |  |              |      |        |        |                    |                   |  |  |        |                    |                               |  |  |  |  |                                              |  |  |  |  |                        |  |
| Test for overall effect: Z = 1.01 (P = 0.31)                                                                      |                   |                        |               |                                   |                      |                      |                                                                                                                                                                                                                                                                                                                                                                                                                                                                                                                                                                                                                                                                                                                                                                                                                                                                                                                                                                                                                                                                                                                                                                                                                                                                                                                                                                                                                                                                 |         |                   |                   |                   |                 |    |        |                                   |                                    |  |  |  |  |              |      |        |        |                    |                   |  |  |        |                    |                               |  |  |  |  |                                              |  |  |  |  |                                   |  |  |  |  |              |      |        |        |                    |                   |  |  |        |                    |                               |  |  |  |  |                                              |  |  |  |  |                        |  |
| <b>1.5.2 Low eosinophil count</b>                                                                                 |                   |                        |               |                                   |                      |                      |                                                                                                                                                                                                                                                                                                                                                                                                                                                                                                                                                                                                                                                                                                                                                                                                                                                                                                                                                                                                                                                                                                                                                                                                                                                                                                                                                                                                                                                                 |         |                   |                   |                   |                 |    |        |                                   |                                    |  |  |  |  |              |      |        |        |                    |                   |  |  |        |                    |                               |  |  |  |  |                                              |  |  |  |  |                                   |  |  |  |  |              |      |        |        |                    |                   |  |  |        |                    |                               |  |  |  |  |                                              |  |  |  |  |                        |  |
| Hanania 2013                                                                                                      | 1.72              | 1.4184                 | 100.0%        | 1.72 [-1.06, 4.50]                |                      |                      |                                                                                                                                                                                                                                                                                                                                                                                                                                                                                                                                                                                                                                                                                                                                                                                                                                                                                                                                                                                                                                                                                                                                                                                                                                                                                                                                                                                                                                                                 |         |                   |                   |                   |                 |    |        |                                   |                                    |  |  |  |  |              |      |        |        |                    |                   |  |  |        |                    |                               |  |  |  |  |                                              |  |  |  |  |                                   |  |  |  |  |              |      |        |        |                    |                   |  |  |        |                    |                               |  |  |  |  |                                              |  |  |  |  |                        |  |
| Subtotal (95% CI)                                                                                                 |                   |                        | 100.0%        | 1.72 [-1.06, 4.50]                |                      |                      |                                                                                                                                                                                                                                                                                                                                                                                                                                                                                                                                                                                                                                                                                                                                                                                                                                                                                                                                                                                                                                                                                                                                                                                                                                                                                                                                                                                                                                                                 |         |                   |                   |                   |                 |    |        |                                   |                                    |  |  |  |  |              |      |        |        |                    |                   |  |  |        |                    |                               |  |  |  |  |                                              |  |  |  |  |                                   |  |  |  |  |              |      |        |        |                    |                   |  |  |        |                    |                               |  |  |  |  |                                              |  |  |  |  |                        |  |
| Heterogeneity: Not applicable                                                                                     |                   |                        |               |                                   |                      |                      |                                                                                                                                                                                                                                                                                                                                                                                                                                                                                                                                                                                                                                                                                                                                                                                                                                                                                                                                                                                                                                                                                                                                                                                                                                                                                                                                                                                                                                                                 |         |                   |                   |                   |                 |    |        |                                   |                                    |  |  |  |  |              |      |        |        |                    |                   |  |  |        |                    |                               |  |  |  |  |                                              |  |  |  |  |                                   |  |  |  |  |              |      |        |        |                    |                   |  |  |        |                    |                               |  |  |  |  |                                              |  |  |  |  |                        |  |
| Test for overall effect: Z = 1.21 (P = 0.23)                                                                      |                   |                        |               |                                   |                      |                      |                                                                                                                                                                                                                                                                                                                                                                                                                                                                                                                                                                                                                                                                                                                                                                                                                                                                                                                                                                                                                                                                                                                                                                                                                                                                                                                                                                                                                                                                 |         |                   |                   |                   |                 |    |        |                                   |                                    |  |  |  |  |              |      |        |        |                    |                   |  |  |        |                    |                               |  |  |  |  |                                              |  |  |  |  |                                   |  |  |  |  |              |      |        |        |                    |                   |  |  |        |                    |                               |  |  |  |  |                                              |  |  |  |  |                        |  |



| Certainty assessment                                                                       |                   |                        |                |                                |                      |                               | № of patients                                                                                                                                                                                                                                                                                                                                                                                                                                                                                                                                                                                                                                                                                                                                                                                                                                                                                                                                                                                                                                                                                                                                                                                                                                                                                                                                                                                                                                                                                                                                                                                                                                                                                                                                                               |         | Effect            |                   | Certainty         | Importance        |                  |                |                                |                                    |                               |                                    |  |  |              |         |        |        |                   |                   |     |     |        |                   |                               |                   |  |     |  |                                               |        |                   |              |     |                                   |     |  |  |  |                               |         |        |        |                   |                   |  |                                              |        |                   |                               |  |  |  |                                   |                                              |  |  |  |  |                                                                                      |              |     |     |     |             |        |                   |                   |  |     |  |     |        |                   |              |     |  |     |  |  |  |                               |  |  |  |  |  |  |                                              |  |  |  |  |  |  |                                                                                   |  |  |  |  |  |  |             |  |
|--------------------------------------------------------------------------------------------|-------------------|------------------------|----------------|--------------------------------|----------------------|-------------------------------|-----------------------------------------------------------------------------------------------------------------------------------------------------------------------------------------------------------------------------------------------------------------------------------------------------------------------------------------------------------------------------------------------------------------------------------------------------------------------------------------------------------------------------------------------------------------------------------------------------------------------------------------------------------------------------------------------------------------------------------------------------------------------------------------------------------------------------------------------------------------------------------------------------------------------------------------------------------------------------------------------------------------------------------------------------------------------------------------------------------------------------------------------------------------------------------------------------------------------------------------------------------------------------------------------------------------------------------------------------------------------------------------------------------------------------------------------------------------------------------------------------------------------------------------------------------------------------------------------------------------------------------------------------------------------------------------------------------------------------------------------------------------------------|---------|-------------------|-------------------|-------------------|-------------------|------------------|----------------|--------------------------------|------------------------------------|-------------------------------|------------------------------------|--|--|--------------|---------|--------|--------|-------------------|-------------------|-----|-----|--------|-------------------|-------------------------------|-------------------|--|-----|--|-----------------------------------------------|--------|-------------------|--------------|-----|-----------------------------------|-----|--|--|--|-------------------------------|---------|--------|--------|-------------------|-------------------|--|----------------------------------------------|--------|-------------------|-------------------------------|--|--|--|-----------------------------------|----------------------------------------------|--|--|--|--|--------------------------------------------------------------------------------------|--------------|-----|-----|-----|-------------|--------|-------------------|-------------------|--|-----|--|-----|--------|-------------------|--------------|-----|--|-----|--|--|--|-------------------------------|--|--|--|--|--|--|----------------------------------------------|--|--|--|--|--|--|-----------------------------------------------------------------------------------|--|--|--|--|--|--|-------------|--|
| № of studies                                                                               | Study design      | Risk of bias           | Inconsistency  | Indirectness                   | Imprecision          | Other considerations          | Omalizumab                                                                                                                                                                                                                                                                                                                                                                                                                                                                                                                                                                                                                                                                                                                                                                                                                                                                                                                                                                                                                                                                                                                                                                                                                                                                                                                                                                                                                                                                                                                                                                                                                                                                                                                                                                  | placebo | Relative (95% CI) | Absolute (95% CI) |                   |                   |                  |                |                                |                                    |                               |                                    |  |  |              |         |        |        |                   |                   |     |     |        |                   |                               |                   |  |     |  |                                               |        |                   |              |     |                                   |     |  |  |  |                               |         |        |        |                   |                   |  |                                              |        |                   |                               |  |  |  |                                   |                                              |  |  |  |  |                                                                                      |              |     |     |     |             |        |                   |                   |  |     |  |     |        |                   |              |     |  |     |  |  |  |                               |  |  |  |  |  |  |                                              |  |  |  |  |  |  |                                                                                   |  |  |  |  |  |  |             |  |
| Adverse events<br>follow up: 48 weeks<br>(higher values, worst outcome)                    |                   |                        |                |                                |                      |                               |                                                                                                                                                                                                                                                                                                                                                                                                                                                                                                                                                                                                                                                                                                                                                                                                                                                                                                                                                                                                                                                                                                                                                                                                                                                                                                                                                                                                                                                                                                                                                                                                                                                                                                                                                                             |         |                   |                   |                   |                   |                  |                |                                |                                    |                               |                                    |  |  |              |         |        |        |                   |                   |     |     |        |                   |                               |                   |  |     |  |                                               |        |                   |              |     |                                   |     |  |  |  |                               |         |        |        |                   |                   |  |                                              |        |                   |                               |  |  |  |                                   |                                              |  |  |  |  |                                                                                      |              |     |     |     |             |        |                   |                   |  |     |  |     |        |                   |              |     |  |     |  |  |  |                               |  |  |  |  |  |  |                                              |  |  |  |  |  |  |                                                                                   |  |  |  |  |  |  |             |  |
| 1 (797 participants)<br><sup>2a</sup>                                                      | randomised trials | serious <sup>a,c</sup> | not serious    | not serious                    | serious <sup>b</sup> | none                          | <p>Percentage of patients with treatment-related adverse events of omalizumab compared to placebo were: Eosinophil (≥260/uL): 80% versus 79.4%; RR= 1.01 (95% CI= 0.91 to 1.11) Eosinophil (&lt;260/uL): 80.6% versus 81.7%; RR= 0.99 (95% CI= 0.90 to 1.09) Number of patients: 797; test for subgroup differences: P =0.77</p> <table><thead><tr><th>Study or Subgroup</th><th>Omalizumab Events</th><th>Omalizumab Total</th><th>Placebo Events</th><th>Placebo Total</th><th>Weight</th><th>Risk Ratio M-H, Fixed, 95% CI</th></tr></thead><tbody><tr><td colspan="7"><b>1.6.1 High eosinophil count</b></td></tr><tr><td>Hanania 2013</td><td>172</td><td>215</td><td>158</td><td>199</td><td>100.0%</td><td>1.01 [0.91, 1.11]</td></tr><tr><td>Subtotal (95% CI)</td><td></td><td>215</td><td></td><td>199</td><td>100.0%</td><td>1.01 [0.91, 1.11]</td></tr><tr><td>Total events</td><td>172</td><td></td><td>158</td><td></td><td></td><td></td></tr><tr><td colspan="7">Heterogeneity: Not applicable</td></tr><tr><td colspan="7">Test for overall effect: Z = 0.15 (P = 0.88)</td></tr><tr><td colspan="7"><b>1.6.2 Low eosinophil count</b></td></tr><tr><td>Hanania 2013</td><td>150</td><td>186</td><td>181</td><td>197</td><td>100.0%</td><td>0.99 [0.90, 1.09]</td></tr><tr><td>Subtotal (95% CI)</td><td></td><td>186</td><td></td><td>197</td><td>100.0%</td><td>0.99 [0.90, 1.09]</td></tr><tr><td>Total events</td><td>150</td><td></td><td>181</td><td></td><td></td><td></td></tr><tr><td colspan="7">Heterogeneity: Not applicable</td></tr><tr><td colspan="7">Test for overall effect: Z = 0.27 (P = 0.79)</td></tr><tr><td colspan="7">Test for subgroup differences: ChiP = 0.09, df= 1 (P = 0.77), I<sup>2</sup> = 0%</td></tr></tbody></table> |         |                   |                   | Study or Subgroup | Omalizumab Events | Omalizumab Total | Placebo Events | Placebo Total                  | Weight                             | Risk Ratio M-H, Fixed, 95% CI | <b>1.6.1 High eosinophil count</b> |  |  |              |         |        |        | Hanania 2013      | 172               | 215 | 158 | 199    | 100.0%            | 1.01 [0.91, 1.11]             | Subtotal (95% CI) |  | 215 |  | 199                                           | 100.0% | 1.01 [0.91, 1.11] | Total events | 172 |                                   | 158 |  |  |  | Heterogeneity: Not applicable |         |        |        |                   |                   |  | Test for overall effect: Z = 0.15 (P = 0.88) |        |                   |                               |  |  |  | <b>1.6.2 Low eosinophil count</b> |                                              |  |  |  |  |                                                                                      | Hanania 2013 | 150 | 186 | 181 | 197         | 100.0% | 0.99 [0.90, 1.09] | Subtotal (95% CI) |  | 186 |  | 197 | 100.0% | 0.99 [0.90, 1.09] | Total events | 150 |  | 181 |  |  |  | Heterogeneity: Not applicable |  |  |  |  |  |  | Test for overall effect: Z = 0.27 (P = 0.79) |  |  |  |  |  |  | Test for subgroup differences: ChiP = 0.09, df= 1 (P = 0.77), I <sup>2</sup> = 0% |  |  |  |  |  |  | ⊕⊕○○<br>LOW |  |
| Study or Subgroup                                                                          | Omalizumab Events | Omalizumab Total       | Placebo Events | Placebo Total                  | Weight               | Risk Ratio M-H, Fixed, 95% CI |                                                                                                                                                                                                                                                                                                                                                                                                                                                                                                                                                                                                                                                                                                                                                                                                                                                                                                                                                                                                                                                                                                                                                                                                                                                                                                                                                                                                                                                                                                                                                                                                                                                                                                                                                                             |         |                   |                   |                   |                   |                  |                |                                |                                    |                               |                                    |  |  |              |         |        |        |                   |                   |     |     |        |                   |                               |                   |  |     |  |                                               |        |                   |              |     |                                   |     |  |  |  |                               |         |        |        |                   |                   |  |                                              |        |                   |                               |  |  |  |                                   |                                              |  |  |  |  |                                                                                      |              |     |     |     |             |        |                   |                   |  |     |  |     |        |                   |              |     |  |     |  |  |  |                               |  |  |  |  |  |  |                                              |  |  |  |  |  |  |                                                                                   |  |  |  |  |  |  |             |  |
| <b>1.6.1 High eosinophil count</b>                                                         |                   |                        |                |                                |                      |                               |                                                                                                                                                                                                                                                                                                                                                                                                                                                                                                                                                                                                                                                                                                                                                                                                                                                                                                                                                                                                                                                                                                                                                                                                                                                                                                                                                                                                                                                                                                                                                                                                                                                                                                                                                                             |         |                   |                   |                   |                   |                  |                |                                |                                    |                               |                                    |  |  |              |         |        |        |                   |                   |     |     |        |                   |                               |                   |  |     |  |                                               |        |                   |              |     |                                   |     |  |  |  |                               |         |        |        |                   |                   |  |                                              |        |                   |                               |  |  |  |                                   |                                              |  |  |  |  |                                                                                      |              |     |     |     |             |        |                   |                   |  |     |  |     |        |                   |              |     |  |     |  |  |  |                               |  |  |  |  |  |  |                                              |  |  |  |  |  |  |                                                                                   |  |  |  |  |  |  |             |  |
| Hanania 2013                                                                               | 172               | 215                    | 158            | 199                            | 100.0%               | 1.01 [0.91, 1.11]             |                                                                                                                                                                                                                                                                                                                                                                                                                                                                                                                                                                                                                                                                                                                                                                                                                                                                                                                                                                                                                                                                                                                                                                                                                                                                                                                                                                                                                                                                                                                                                                                                                                                                                                                                                                             |         |                   |                   |                   |                   |                  |                |                                |                                    |                               |                                    |  |  |              |         |        |        |                   |                   |     |     |        |                   |                               |                   |  |     |  |                                               |        |                   |              |     |                                   |     |  |  |  |                               |         |        |        |                   |                   |  |                                              |        |                   |                               |  |  |  |                                   |                                              |  |  |  |  |                                                                                      |              |     |     |     |             |        |                   |                   |  |     |  |     |        |                   |              |     |  |     |  |  |  |                               |  |  |  |  |  |  |                                              |  |  |  |  |  |  |                                                                                   |  |  |  |  |  |  |             |  |
| Subtotal (95% CI)                                                                          |                   | 215                    |                | 199                            | 100.0%               | 1.01 [0.91, 1.11]             |                                                                                                                                                                                                                                                                                                                                                                                                                                                                                                                                                                                                                                                                                                                                                                                                                                                                                                                                                                                                                                                                                                                                                                                                                                                                                                                                                                                                                                                                                                                                                                                                                                                                                                                                                                             |         |                   |                   |                   |                   |                  |                |                                |                                    |                               |                                    |  |  |              |         |        |        |                   |                   |     |     |        |                   |                               |                   |  |     |  |                                               |        |                   |              |     |                                   |     |  |  |  |                               |         |        |        |                   |                   |  |                                              |        |                   |                               |  |  |  |                                   |                                              |  |  |  |  |                                                                                      |              |     |     |     |             |        |                   |                   |  |     |  |     |        |                   |              |     |  |     |  |  |  |                               |  |  |  |  |  |  |                                              |  |  |  |  |  |  |                                                                                   |  |  |  |  |  |  |             |  |
| Total events                                                                               | 172               |                        | 158            |                                |                      |                               |                                                                                                                                                                                                                                                                                                                                                                                                                                                                                                                                                                                                                                                                                                                                                                                                                                                                                                                                                                                                                                                                                                                                                                                                                                                                                                                                                                                                                                                                                                                                                                                                                                                                                                                                                                             |         |                   |                   |                   |                   |                  |                |                                |                                    |                               |                                    |  |  |              |         |        |        |                   |                   |     |     |        |                   |                               |                   |  |     |  |                                               |        |                   |              |     |                                   |     |  |  |  |                               |         |        |        |                   |                   |  |                                              |        |                   |                               |  |  |  |                                   |                                              |  |  |  |  |                                                                                      |              |     |     |     |             |        |                   |                   |  |     |  |     |        |                   |              |     |  |     |  |  |  |                               |  |  |  |  |  |  |                                              |  |  |  |  |  |  |                                                                                   |  |  |  |  |  |  |             |  |
| Heterogeneity: Not applicable                                                              |                   |                        |                |                                |                      |                               |                                                                                                                                                                                                                                                                                                                                                                                                                                                                                                                                                                                                                                                                                                                                                                                                                                                                                                                                                                                                                                                                                                                                                                                                                                                                                                                                                                                                                                                                                                                                                                                                                                                                                                                                                                             |         |                   |                   |                   |                   |                  |                |                                |                                    |                               |                                    |  |  |              |         |        |        |                   |                   |     |     |        |                   |                               |                   |  |     |  |                                               |        |                   |              |     |                                   |     |  |  |  |                               |         |        |        |                   |                   |  |                                              |        |                   |                               |  |  |  |                                   |                                              |  |  |  |  |                                                                                      |              |     |     |     |             |        |                   |                   |  |     |  |     |        |                   |              |     |  |     |  |  |  |                               |  |  |  |  |  |  |                                              |  |  |  |  |  |  |                                                                                   |  |  |  |  |  |  |             |  |
| Test for overall effect: Z = 0.15 (P = 0.88)                                               |                   |                        |                |                                |                      |                               |                                                                                                                                                                                                                                                                                                                                                                                                                                                                                                                                                                                                                                                                                                                                                                                                                                                                                                                                                                                                                                                                                                                                                                                                                                                                                                                                                                                                                                                                                                                                                                                                                                                                                                                                                                             |         |                   |                   |                   |                   |                  |                |                                |                                    |                               |                                    |  |  |              |         |        |        |                   |                   |     |     |        |                   |                               |                   |  |     |  |                                               |        |                   |              |     |                                   |     |  |  |  |                               |         |        |        |                   |                   |  |                                              |        |                   |                               |  |  |  |                                   |                                              |  |  |  |  |                                                                                      |              |     |     |     |             |        |                   |                   |  |     |  |     |        |                   |              |     |  |     |  |  |  |                               |  |  |  |  |  |  |                                              |  |  |  |  |  |  |                                                                                   |  |  |  |  |  |  |             |  |
| <b>1.6.2 Low eosinophil count</b>                                                          |                   |                        |                |                                |                      |                               |                                                                                                                                                                                                                                                                                                                                                                                                                                                                                                                                                                                                                                                                                                                                                                                                                                                                                                                                                                                                                                                                                                                                                                                                                                                                                                                                                                                                                                                                                                                                                                                                                                                                                                                                                                             |         |                   |                   |                   |                   |                  |                |                                |                                    |                               |                                    |  |  |              |         |        |        |                   |                   |     |     |        |                   |                               |                   |  |     |  |                                               |        |                   |              |     |                                   |     |  |  |  |                               |         |        |        |                   |                   |  |                                              |        |                   |                               |  |  |  |                                   |                                              |  |  |  |  |                                                                                      |              |     |     |     |             |        |                   |                   |  |     |  |     |        |                   |              |     |  |     |  |  |  |                               |  |  |  |  |  |  |                                              |  |  |  |  |  |  |                                                                                   |  |  |  |  |  |  |             |  |
| Hanania 2013                                                                               | 150               | 186                    | 181            | 197                            | 100.0%               | 0.99 [0.90, 1.09]             |                                                                                                                                                                                                                                                                                                                                                                                                                                                                                                                                                                                                                                                                                                                                                                                                                                                                                                                                                                                                                                                                                                                                                                                                                                                                                                                                                                                                                                                                                                                                                                                                                                                                                                                                                                             |         |                   |                   |                   |                   |                  |                |                                |                                    |                               |                                    |  |  |              |         |        |        |                   |                   |     |     |        |                   |                               |                   |  |     |  |                                               |        |                   |              |     |                                   |     |  |  |  |                               |         |        |        |                   |                   |  |                                              |        |                   |                               |  |  |  |                                   |                                              |  |  |  |  |                                                                                      |              |     |     |     |             |        |                   |                   |  |     |  |     |        |                   |              |     |  |     |  |  |  |                               |  |  |  |  |  |  |                                              |  |  |  |  |  |  |                                                                                   |  |  |  |  |  |  |             |  |
| Subtotal (95% CI)                                                                          |                   | 186                    |                | 197                            | 100.0%               | 0.99 [0.90, 1.09]             |                                                                                                                                                                                                                                                                                                                                                                                                                                                                                                                                                                                                                                                                                                                                                                                                                                                                                                                                                                                                                                                                                                                                                                                                                                                                                                                                                                                                                                                                                                                                                                                                                                                                                                                                                                             |         |                   |                   |                   |                   |                  |                |                                |                                    |                               |                                    |  |  |              |         |        |        |                   |                   |     |     |        |                   |                               |                   |  |     |  |                                               |        |                   |              |     |                                   |     |  |  |  |                               |         |        |        |                   |                   |  |                                              |        |                   |                               |  |  |  |                                   |                                              |  |  |  |  |                                                                                      |              |     |     |     |             |        |                   |                   |  |     |  |     |        |                   |              |     |  |     |  |  |  |                               |  |  |  |  |  |  |                                              |  |  |  |  |  |  |                                                                                   |  |  |  |  |  |  |             |  |
| Total events                                                                               | 150               |                        | 181            |                                |                      |                               |                                                                                                                                                                                                                                                                                                                                                                                                                                                                                                                                                                                                                                                                                                                                                                                                                                                                                                                                                                                                                                                                                                                                                                                                                                                                                                                                                                                                                                                                                                                                                                                                                                                                                                                                                                             |         |                   |                   |                   |                   |                  |                |                                |                                    |                               |                                    |  |  |              |         |        |        |                   |                   |     |     |        |                   |                               |                   |  |     |  |                                               |        |                   |              |     |                                   |     |  |  |  |                               |         |        |        |                   |                   |  |                                              |        |                   |                               |  |  |  |                                   |                                              |  |  |  |  |                                                                                      |              |     |     |     |             |        |                   |                   |  |     |  |     |        |                   |              |     |  |     |  |  |  |                               |  |  |  |  |  |  |                                              |  |  |  |  |  |  |                                                                                   |  |  |  |  |  |  |             |  |
| Heterogeneity: Not applicable                                                              |                   |                        |                |                                |                      |                               |                                                                                                                                                                                                                                                                                                                                                                                                                                                                                                                                                                                                                                                                                                                                                                                                                                                                                                                                                                                                                                                                                                                                                                                                                                                                                                                                                                                                                                                                                                                                                                                                                                                                                                                                                                             |         |                   |                   |                   |                   |                  |                |                                |                                    |                               |                                    |  |  |              |         |        |        |                   |                   |     |     |        |                   |                               |                   |  |     |  |                                               |        |                   |              |     |                                   |     |  |  |  |                               |         |        |        |                   |                   |  |                                              |        |                   |                               |  |  |  |                                   |                                              |  |  |  |  |                                                                                      |              |     |     |     |             |        |                   |                   |  |     |  |     |        |                   |              |     |  |     |  |  |  |                               |  |  |  |  |  |  |                                              |  |  |  |  |  |  |                                                                                   |  |  |  |  |  |  |             |  |
| Test for overall effect: Z = 0.27 (P = 0.79)                                               |                   |                        |                |                                |                      |                               |                                                                                                                                                                                                                                                                                                                                                                                                                                                                                                                                                                                                                                                                                                                                                                                                                                                                                                                                                                                                                                                                                                                                                                                                                                                                                                                                                                                                                                                                                                                                                                                                                                                                                                                                                                             |         |                   |                   |                   |                   |                  |                |                                |                                    |                               |                                    |  |  |              |         |        |        |                   |                   |     |     |        |                   |                               |                   |  |     |  |                                               |        |                   |              |     |                                   |     |  |  |  |                               |         |        |        |                   |                   |  |                                              |        |                   |                               |  |  |  |                                   |                                              |  |  |  |  |                                                                                      |              |     |     |     |             |        |                   |                   |  |     |  |     |        |                   |              |     |  |     |  |  |  |                               |  |  |  |  |  |  |                                              |  |  |  |  |  |  |                                                                                   |  |  |  |  |  |  |             |  |
| Test for subgroup differences: ChiP = 0.09, df= 1 (P = 0.77), I <sup>2</sup> = 0%          |                   |                        |                |                                |                      |                               |                                                                                                                                                                                                                                                                                                                                                                                                                                                                                                                                                                                                                                                                                                                                                                                                                                                                                                                                                                                                                                                                                                                                                                                                                                                                                                                                                                                                                                                                                                                                                                                                                                                                                                                                                                             |         |                   |                   |                   |                   |                  |                |                                |                                    |                               |                                    |  |  |              |         |        |        |                   |                   |     |     |        |                   |                               |                   |  |     |  |                                               |        |                   |              |     |                                   |     |  |  |  |                               |         |        |        |                   |                   |  |                                              |        |                   |                               |  |  |  |                                   |                                              |  |  |  |  |                                                                                      |              |     |     |     |             |        |                   |                   |  |     |  |     |        |                   |              |     |  |     |  |  |  |                               |  |  |  |  |  |  |                                              |  |  |  |  |  |  |                                                                                   |  |  |  |  |  |  |             |  |
| Time to first asthma exacerbation<br>Follow up: 48 weeks<br>(lower values, better outcome) |                   |                        |                |                                |                      |                               |                                                                                                                                                                                                                                                                                                                                                                                                                                                                                                                                                                                                                                                                                                                                                                                                                                                                                                                                                                                                                                                                                                                                                                                                                                                                                                                                                                                                                                                                                                                                                                                                                                                                                                                                                                             |         |                   |                   |                   |                   |                  |                |                                |                                    |                               |                                    |  |  |              |         |        |        |                   |                   |     |     |        |                   |                               |                   |  |     |  |                                               |        |                   |              |     |                                   |     |  |  |  |                               |         |        |        |                   |                   |  |                                              |        |                   |                               |  |  |  |                                   |                                              |  |  |  |  |                                                                                      |              |     |     |     |             |        |                   |                   |  |     |  |     |        |                   |              |     |  |     |  |  |  |                               |  |  |  |  |  |  |                                              |  |  |  |  |  |  |                                                                                   |  |  |  |  |  |  |             |  |
| 1 (797 participants)<br><sup>2</sup>                                                       | randomised trials | serious <sup>a,c</sup> | not serious    | not serious                    | serious <sup>b</sup> | none                          | <p>Time to first asthma exacerbation of omalizumab compared to placebo were: Eosinophil (≥260/uL): HR= 0.64 (95% CI= 0.48 to 0.86) Eosinophil (&lt;260/uL): HR= 0.95 (95% CI= 0.68 to 1.3) Number of patients: 797; test for subgroup differences: P=0.08</p> <table><thead><tr><th>Study or Subgroup</th><th>log[Hazard Ratio]</th><th>SE</th><th>Weight</th><th>Hazard Ratio IV, Fixed, 95% CI</th></tr></thead><tbody><tr><td colspan="5"><b>1.7.1 High eosinophil count</b></td></tr><tr><td>Hanania 2013</td><td>-0.4463</td><td>0.1468</td><td>100.0%</td><td>0.64 [0.48, 0.85]</td></tr><tr><td>Subtotal (95% CI)</td><td></td><td></td><td>100.0%</td><td>0.64 [0.48, 0.85]</td></tr><tr><td colspan="5">Heterogeneity: Not applicable</td></tr><tr><td colspan="5">Test for overall effect: Z = 3.04 (P = 0.002)</td></tr><tr><td colspan="5"><b>1.7.2 Low eosinophil count</b></td></tr><tr><td>Hanania 2013</td><td>-0.0513</td><td>0.1706</td><td>100.0%</td><td>0.95 [0.68, 1.33]</td></tr><tr><td>Subtotal (95% CI)</td><td></td><td></td><td>100.0%</td><td>0.95 [0.68, 1.33]</td></tr><tr><td colspan="5">Heterogeneity: Not applicable</td></tr><tr><td colspan="5">Test for overall effect: Z = 0.30 (P = 0.76)</td></tr><tr><td colspan="5">Test for subgroup differences: ChiP = 3.08, df= 1 (P = 0.08), I<sup>2</sup> = 67.5%</td></tr></tbody></table>                                                                                                                                                                                                                                                                                                                                                                                                |         |                   |                   | Study or Subgroup | log[Hazard Ratio] | SE               | Weight         | Hazard Ratio IV, Fixed, 95% CI | <b>1.7.1 High eosinophil count</b> |                               |                                    |  |  | Hanania 2013 | -0.4463 | 0.1468 | 100.0% | 0.64 [0.48, 0.85] | Subtotal (95% CI) |     |     | 100.0% | 0.64 [0.48, 0.85] | Heterogeneity: Not applicable |                   |  |     |  | Test for overall effect: Z = 3.04 (P = 0.002) |        |                   |              |     | <b>1.7.2 Low eosinophil count</b> |     |  |  |  | Hanania 2013                  | -0.0513 | 0.1706 | 100.0% | 0.95 [0.68, 1.33] | Subtotal (95% CI) |  |                                              | 100.0% | 0.95 [0.68, 1.33] | Heterogeneity: Not applicable |  |  |  |                                   | Test for overall effect: Z = 0.30 (P = 0.76) |  |  |  |  | Test for subgroup differences: ChiP = 3.08, df= 1 (P = 0.08), I <sup>2</sup> = 67.5% |              |     |     |     | ⊕⊕○○<br>LOW |        |                   |                   |  |     |  |     |        |                   |              |     |  |     |  |  |  |                               |  |  |  |  |  |  |                                              |  |  |  |  |  |  |                                                                                   |  |  |  |  |  |  |             |  |
| Study or Subgroup                                                                          | log[Hazard Ratio] | SE                     | Weight         | Hazard Ratio IV, Fixed, 95% CI |                      |                               |                                                                                                                                                                                                                                                                                                                                                                                                                                                                                                                                                                                                                                                                                                                                                                                                                                                                                                                                                                                                                                                                                                                                                                                                                                                                                                                                                                                                                                                                                                                                                                                                                                                                                                                                                                             |         |                   |                   |                   |                   |                  |                |                                |                                    |                               |                                    |  |  |              |         |        |        |                   |                   |     |     |        |                   |                               |                   |  |     |  |                                               |        |                   |              |     |                                   |     |  |  |  |                               |         |        |        |                   |                   |  |                                              |        |                   |                               |  |  |  |                                   |                                              |  |  |  |  |                                                                                      |              |     |     |     |             |        |                   |                   |  |     |  |     |        |                   |              |     |  |     |  |  |  |                               |  |  |  |  |  |  |                                              |  |  |  |  |  |  |                                                                                   |  |  |  |  |  |  |             |  |
| <b>1.7.1 High eosinophil count</b>                                                         |                   |                        |                |                                |                      |                               |                                                                                                                                                                                                                                                                                                                                                                                                                                                                                                                                                                                                                                                                                                                                                                                                                                                                                                                                                                                                                                                                                                                                                                                                                                                                                                                                                                                                                                                                                                                                                                                                                                                                                                                                                                             |         |                   |                   |                   |                   |                  |                |                                |                                    |                               |                                    |  |  |              |         |        |        |                   |                   |     |     |        |                   |                               |                   |  |     |  |                                               |        |                   |              |     |                                   |     |  |  |  |                               |         |        |        |                   |                   |  |                                              |        |                   |                               |  |  |  |                                   |                                              |  |  |  |  |                                                                                      |              |     |     |     |             |        |                   |                   |  |     |  |     |        |                   |              |     |  |     |  |  |  |                               |  |  |  |  |  |  |                                              |  |  |  |  |  |  |                                                                                   |  |  |  |  |  |  |             |  |
| Hanania 2013                                                                               | -0.4463           | 0.1468                 | 100.0%         | 0.64 [0.48, 0.85]              |                      |                               |                                                                                                                                                                                                                                                                                                                                                                                                                                                                                                                                                                                                                                                                                                                                                                                                                                                                                                                                                                                                                                                                                                                                                                                                                                                                                                                                                                                                                                                                                                                                                                                                                                                                                                                                                                             |         |                   |                   |                   |                   |                  |                |                                |                                    |                               |                                    |  |  |              |         |        |        |                   |                   |     |     |        |                   |                               |                   |  |     |  |                                               |        |                   |              |     |                                   |     |  |  |  |                               |         |        |        |                   |                   |  |                                              |        |                   |                               |  |  |  |                                   |                                              |  |  |  |  |                                                                                      |              |     |     |     |             |        |                   |                   |  |     |  |     |        |                   |              |     |  |     |  |  |  |                               |  |  |  |  |  |  |                                              |  |  |  |  |  |  |                                                                                   |  |  |  |  |  |  |             |  |
| Subtotal (95% CI)                                                                          |                   |                        | 100.0%         | 0.64 [0.48, 0.85]              |                      |                               |                                                                                                                                                                                                                                                                                                                                                                                                                                                                                                                                                                                                                                                                                                                                                                                                                                                                                                                                                                                                                                                                                                                                                                                                                                                                                                                                                                                                                                                                                                                                                                                                                                                                                                                                                                             |         |                   |                   |                   |                   |                  |                |                                |                                    |                               |                                    |  |  |              |         |        |        |                   |                   |     |     |        |                   |                               |                   |  |     |  |                                               |        |                   |              |     |                                   |     |  |  |  |                               |         |        |        |                   |                   |  |                                              |        |                   |                               |  |  |  |                                   |                                              |  |  |  |  |                                                                                      |              |     |     |     |             |        |                   |                   |  |     |  |     |        |                   |              |     |  |     |  |  |  |                               |  |  |  |  |  |  |                                              |  |  |  |  |  |  |                                                                                   |  |  |  |  |  |  |             |  |
| Heterogeneity: Not applicable                                                              |                   |                        |                |                                |                      |                               |                                                                                                                                                                                                                                                                                                                                                                                                                                                                                                                                                                                                                                                                                                                                                                                                                                                                                                                                                                                                                                                                                                                                                                                                                                                                                                                                                                                                                                                                                                                                                                                                                                                                                                                                                                             |         |                   |                   |                   |                   |                  |                |                                |                                    |                               |                                    |  |  |              |         |        |        |                   |                   |     |     |        |                   |                               |                   |  |     |  |                                               |        |                   |              |     |                                   |     |  |  |  |                               |         |        |        |                   |                   |  |                                              |        |                   |                               |  |  |  |                                   |                                              |  |  |  |  |                                                                                      |              |     |     |     |             |        |                   |                   |  |     |  |     |        |                   |              |     |  |     |  |  |  |                               |  |  |  |  |  |  |                                              |  |  |  |  |  |  |                                                                                   |  |  |  |  |  |  |             |  |
| Test for overall effect: Z = 3.04 (P = 0.002)                                              |                   |                        |                |                                |                      |                               |                                                                                                                                                                                                                                                                                                                                                                                                                                                                                                                                                                                                                                                                                                                                                                                                                                                                                                                                                                                                                                                                                                                                                                                                                                                                                                                                                                                                                                                                                                                                                                                                                                                                                                                                                                             |         |                   |                   |                   |                   |                  |                |                                |                                    |                               |                                    |  |  |              |         |        |        |                   |                   |     |     |        |                   |                               |                   |  |     |  |                                               |        |                   |              |     |                                   |     |  |  |  |                               |         |        |        |                   |                   |  |                                              |        |                   |                               |  |  |  |                                   |                                              |  |  |  |  |                                                                                      |              |     |     |     |             |        |                   |                   |  |     |  |     |        |                   |              |     |  |     |  |  |  |                               |  |  |  |  |  |  |                                              |  |  |  |  |  |  |                                                                                   |  |  |  |  |  |  |             |  |
| <b>1.7.2 Low eosinophil count</b>                                                          |                   |                        |                |                                |                      |                               |                                                                                                                                                                                                                                                                                                                                                                                                                                                                                                                                                                                                                                                                                                                                                                                                                                                                                                                                                                                                                                                                                                                                                                                                                                                                                                                                                                                                                                                                                                                                                                                                                                                                                                                                                                             |         |                   |                   |                   |                   |                  |                |                                |                                    |                               |                                    |  |  |              |         |        |        |                   |                   |     |     |        |                   |                               |                   |  |     |  |                                               |        |                   |              |     |                                   |     |  |  |  |                               |         |        |        |                   |                   |  |                                              |        |                   |                               |  |  |  |                                   |                                              |  |  |  |  |                                                                                      |              |     |     |     |             |        |                   |                   |  |     |  |     |        |                   |              |     |  |     |  |  |  |                               |  |  |  |  |  |  |                                              |  |  |  |  |  |  |                                                                                   |  |  |  |  |  |  |             |  |
| Hanania 2013                                                                               | -0.0513           | 0.1706                 | 100.0%         | 0.95 [0.68, 1.33]              |                      |                               |                                                                                                                                                                                                                                                                                                                                                                                                                                                                                                                                                                                                                                                                                                                                                                                                                                                                                                                                                                                                                                                                                                                                                                                                                                                                                                                                                                                                                                                                                                                                                                                                                                                                                                                                                                             |         |                   |                   |                   |                   |                  |                |                                |                                    |                               |                                    |  |  |              |         |        |        |                   |                   |     |     |        |                   |                               |                   |  |     |  |                                               |        |                   |              |     |                                   |     |  |  |  |                               |         |        |        |                   |                   |  |                                              |        |                   |                               |  |  |  |                                   |                                              |  |  |  |  |                                                                                      |              |     |     |     |             |        |                   |                   |  |     |  |     |        |                   |              |     |  |     |  |  |  |                               |  |  |  |  |  |  |                                              |  |  |  |  |  |  |                                                                                   |  |  |  |  |  |  |             |  |
| Subtotal (95% CI)                                                                          |                   |                        | 100.0%         | 0.95 [0.68, 1.33]              |                      |                               |                                                                                                                                                                                                                                                                                                                                                                                                                                                                                                                                                                                                                                                                                                                                                                                                                                                                                                                                                                                                                                                                                                                                                                                                                                                                                                                                                                                                                                                                                                                                                                                                                                                                                                                                                                             |         |                   |                   |                   |                   |                  |                |                                |                                    |                               |                                    |  |  |              |         |        |        |                   |                   |     |     |        |                   |                               |                   |  |     |  |                                               |        |                   |              |     |                                   |     |  |  |  |                               |         |        |        |                   |                   |  |                                              |        |                   |                               |  |  |  |                                   |                                              |  |  |  |  |                                                                                      |              |     |     |     |             |        |                   |                   |  |     |  |     |        |                   |              |     |  |     |  |  |  |                               |  |  |  |  |  |  |                                              |  |  |  |  |  |  |                                                                                   |  |  |  |  |  |  |             |  |
| Heterogeneity: Not applicable                                                              |                   |                        |                |                                |                      |                               |                                                                                                                                                                                                                                                                                                                                                                                                                                                                                                                                                                                                                                                                                                                                                                                                                                                                                                                                                                                                                                                                                                                                                                                                                                                                                                                                                                                                                                                                                                                                                                                                                                                                                                                                                                             |         |                   |                   |                   |                   |                  |                |                                |                                    |                               |                                    |  |  |              |         |        |        |                   |                   |     |     |        |                   |                               |                   |  |     |  |                                               |        |                   |              |     |                                   |     |  |  |  |                               |         |        |        |                   |                   |  |                                              |        |                   |                               |  |  |  |                                   |                                              |  |  |  |  |                                                                                      |              |     |     |     |             |        |                   |                   |  |     |  |     |        |                   |              |     |  |     |  |  |  |                               |  |  |  |  |  |  |                                              |  |  |  |  |  |  |                                                                                   |  |  |  |  |  |  |             |  |
| Test for overall effect: Z = 0.30 (P = 0.76)                                               |                   |                        |                |                                |                      |                               |                                                                                                                                                                                                                                                                                                                                                                                                                                                                                                                                                                                                                                                                                                                                                                                                                                                                                                                                                                                                                                                                                                                                                                                                                                                                                                                                                                                                                                                                                                                                                                                                                                                                                                                                                                             |         |                   |                   |                   |                   |                  |                |                                |                                    |                               |                                    |  |  |              |         |        |        |                   |                   |     |     |        |                   |                               |                   |  |     |  |                                               |        |                   |              |     |                                   |     |  |  |  |                               |         |        |        |                   |                   |  |                                              |        |                   |                               |  |  |  |                                   |                                              |  |  |  |  |                                                                                      |              |     |     |     |             |        |                   |                   |  |     |  |     |        |                   |              |     |  |     |  |  |  |                               |  |  |  |  |  |  |                                              |  |  |  |  |  |  |                                                                                   |  |  |  |  |  |  |             |  |
| Test for subgroup differences: ChiP = 3.08, df= 1 (P = 0.08), I <sup>2</sup> = 67.5%       |                   |                        |                |                                |                      |                               |                                                                                                                                                                                                                                                                                                                                                                                                                                                                                                                                                                                                                                                                                                                                                                                                                                                                                                                                                                                                                                                                                                                                                                                                                                                                                                                                                                                                                                                                                                                                                                                                                                                                                                                                                                             |         |                   |                   |                   |                   |                  |                |                                |                                    |                               |                                    |  |  |              |         |        |        |                   |                   |     |     |        |                   |                               |                   |  |     |  |                                               |        |                   |              |     |                                   |     |  |  |  |                               |         |        |        |                   |                   |  |                                              |        |                   |                               |  |  |  |                                   |                                              |  |  |  |  |                                                                                      |              |     |     |     |             |        |                   |                   |  |     |  |     |        |                   |              |     |  |     |  |  |  |                               |  |  |  |  |  |  |                                              |  |  |  |  |  |  |                                                                                   |  |  |  |  |  |  |             |  |

CI: Confidence interval

## Explanations

- a. Risk of bias related to incomplete outcome data: eosinophil counts were not necessarily collected for all patients at baseline and may therefore have been missing at random depending on their availability in the original laboratory test records
- b. Optimal information size not reached for the main objective (and then for the subgroup analysis), reported by authors
- c. Potential risk of bias associated with selective reporting bias (subgroups analyses not stated in the protocol)
- d. P values about Test for subgroup differences were estimated in RevMan and assuming that LSM is similar to Mean differences (just for descriptive purposes)
- e. Only Hanania 2013 provided subgroup information for this outcome

## References

1. Busse W, Spector S, Rosén K, Wang Y, Alpan O. High eosinophil count: a potential biomarker for assessing successful omalizumab treatment effects. *J Allergy Clin Immunol*; 2013.
2. Hanania NA<sup>1</sup>, Wenzel S, Rosén K, Hsieh HJ, Mosesova S, Choy DF, Lal P, Arron JR, Harris JM, Busse W. Exploring the effects of omalizumab in allergic asthma: an analysis of biomarkers in the EXTRA study. *Am J Respir Crit Care Med*; 2013.

**GRADE Evidence Profile: OMALIZUMAB – FeNO**

| Certainty assessment                                                                                                                                         |                   |                      |               |                                      |                                      |                      | № of patients                                                                                                                                                                                                                                                                                                                                                                                                                                                                                                                                                                                                                                                                                                                                                                                                                                                                                                                                                                                                                                                                                                                                                                                                                                                                                                                                                                                                                                                                                                                                                                       |         | Effect            |                   | Certainty         | Importance      |    |        |                                      |                                      |                               |  |  |  |  |  |              |      |        |        |                   |  |                   |  |  |        |                   |  |                                                                               |  |  |  |  |  |                              |  |  |  |  |  |              |      |        |        |                    |  |                   |  |  |        |                    |  |                                                                               |  |  |  |  |  |                                                                     |  |  |  |  |  |             |  |
|--------------------------------------------------------------------------------------------------------------------------------------------------------------|-------------------|----------------------|---------------|--------------------------------------|--------------------------------------|----------------------|-------------------------------------------------------------------------------------------------------------------------------------------------------------------------------------------------------------------------------------------------------------------------------------------------------------------------------------------------------------------------------------------------------------------------------------------------------------------------------------------------------------------------------------------------------------------------------------------------------------------------------------------------------------------------------------------------------------------------------------------------------------------------------------------------------------------------------------------------------------------------------------------------------------------------------------------------------------------------------------------------------------------------------------------------------------------------------------------------------------------------------------------------------------------------------------------------------------------------------------------------------------------------------------------------------------------------------------------------------------------------------------------------------------------------------------------------------------------------------------------------------------------------------------------------------------------------------------|---------|-------------------|-------------------|-------------------|-----------------|----|--------|--------------------------------------|--------------------------------------|-------------------------------|--|--|--|--|--|--------------|------|--------|--------|-------------------|--|-------------------|--|--|--------|-------------------|--|-------------------------------------------------------------------------------|--|--|--|--|--|------------------------------|--|--|--|--|--|--------------|------|--------|--------|--------------------|--|-------------------|--|--|--------|--------------------|--|-------------------------------------------------------------------------------|--|--|--|--|--|---------------------------------------------------------------------|--|--|--|--|--|-------------|--|
| № of studies                                                                                                                                                 | Study design      | Risk of bias         | Inconsistency | Indirectness                         | Imprecision                          | Other considerations | omalizumab                                                                                                                                                                                                                                                                                                                                                                                                                                                                                                                                                                                                                                                                                                                                                                                                                                                                                                                                                                                                                                                                                                                                                                                                                                                                                                                                                                                                                                                                                                                                                                          | placebo | Relative (95% CI) | Absolute (95% CI) |                   |                 |    |        |                                      |                                      |                               |  |  |  |  |  |              |      |        |        |                   |  |                   |  |  |        |                   |  |                                                                               |  |  |  |  |  |                              |  |  |  |  |  |              |      |        |        |                    |  |                   |  |  |        |                    |  |                                                                               |  |  |  |  |  |                                                                     |  |  |  |  |  |             |  |
| Reduction in exacerbation rates per patient<br>Follow up: 48 weeks<br>(higher percentage, better reduction)                                                  |                   |                      |               |                                      |                                      |                      |                                                                                                                                                                                                                                                                                                                                                                                                                                                                                                                                                                                                                                                                                                                                                                                                                                                                                                                                                                                                                                                                                                                                                                                                                                                                                                                                                                                                                                                                                                                                                                                     |         |                   |                   |                   |                 |    |        |                                      |                                      |                               |  |  |  |  |  |              |      |        |        |                   |  |                   |  |  |        |                   |  |                                                                               |  |  |  |  |  |                              |  |  |  |  |  |              |      |        |        |                    |  |                   |  |  |        |                    |  |                                                                               |  |  |  |  |  |                                                                     |  |  |  |  |  |             |  |
| 1 (394 participants) <sup>1</sup>                                                                                                                            | randomised trials | serious <sup>a</sup> | not serious   | not serious                          | serious <sup>b</sup>                 | none                 | Relative reduction in exacerbation rate of omalizumab compared to placebo were: FENO(≥19.5 ppb): 53% (95% CI: 37 to 70); p-value= 0.001 FENO(<19.5 ppb): 16% (95% CI: -32 to 46); p-value= 0.45 Number of patients: 394; test for subgroup differences: no available                                                                                                                                                                                                                                                                                                                                                                                                                                                                                                                                                                                                                                                                                                                                                                                                                                                                                                                                                                                                                                                                                                                                                                                                                                                                                                                |         |                   |                   | ⊕⊕○○<br>LOW       |                 |    |        |                                      |                                      |                               |  |  |  |  |  |              |      |        |        |                   |  |                   |  |  |        |                   |  |                                                                               |  |  |  |  |  |                              |  |  |  |  |  |              |      |        |        |                    |  |                   |  |  |        |                    |  |                                                                               |  |  |  |  |  |                                                                     |  |  |  |  |  |             |  |
| Change from baseline to 48 week in AQLQ<br>Follow up: 48 weeks<br>7-point scale (7 = not impaired at all - 1 = severely impaired; Higher values, better QoL) |                   |                      |               |                                      |                                      |                      |                                                                                                                                                                                                                                                                                                                                                                                                                                                                                                                                                                                                                                                                                                                                                                                                                                                                                                                                                                                                                                                                                                                                                                                                                                                                                                                                                                                                                                                                                                                                                                                     |         |                   |                   |                   |                 |    |        |                                      |                                      |                               |  |  |  |  |  |              |      |        |        |                   |  |                   |  |  |        |                   |  |                                                                               |  |  |  |  |  |                              |  |  |  |  |  |              |      |        |        |                    |  |                   |  |  |        |                    |  |                                                                               |  |  |  |  |  |                                                                     |  |  |  |  |  |             |  |
| 1 (394 participants) <sup>1</sup>                                                                                                                            | randomised trials | serious <sup>a</sup> | not serious   | not serious                          | serious <sup>b</sup>                 | none                 | <div>Mean change from baseline to week 48 of omalizumab compared to placebo were: FENO (≥19.5 ppb): Least square mean difference= 0.39 (95% CI: 0.06 to 0.73); p-value= 0.02 FENO (&lt;19.5 ppb): Least square mean difference= 0.24 (95% CI: -0.09 to 0.57); p-value= 0.16 Number of patients: 394; test for subgroup differences: P= 0.53 <sup>c</sup></div> <table><thead><tr><th>Study or Subgroup</th><th>Mean Difference</th><th>SE</th><th>Weight</th><th>Mean Difference<br/>IV, Fixed, 95% CI</th><th>Mean Difference<br/>IV, Fixed, 95% CI</th></tr></thead><tbody><tr><td colspan="6"><b>2.1.1 High FENO levels</b></td></tr><tr><td>Hanania 2013</td><td>0.39</td><td>0.1684</td><td>100.0%</td><td>0.39 [0.06, 0.72]</td><td></td></tr><tr><td>Subtotal (95% CI)</td><td></td><td></td><td>100.0%</td><td>0.39 [0.06, 0.72]</td><td></td></tr><tr><td colspan="6">Heterogeneity: Not applicable<br/>Test for overall effect: Z = 2.32 (P = 0.02)</td></tr><tr><td colspan="6"><b>2.1.2 Low FENO levels</b></td></tr><tr><td>Hanania 2013</td><td>0.24</td><td>0.1684</td><td>100.0%</td><td>0.24 [-0.09, 0.57]</td><td></td></tr><tr><td>Subtotal (95% CI)</td><td></td><td></td><td>100.0%</td><td>0.24 [-0.09, 0.57]</td><td></td></tr><tr><td colspan="6">Heterogeneity: Not applicable<br/>Test for overall effect: Z = 1.43 (P = 0.15)</td></tr><tr><td colspan="6">Test for subgroup differences: Chi²= 0.40, df= 1 (P = 0.53), I²= 0%</td></tr></tbody></table> <div>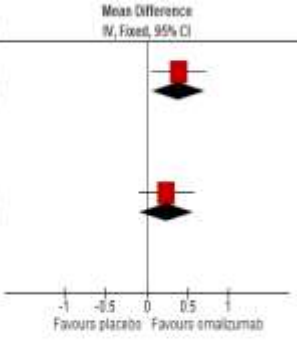</div> |         |                   |                   | Study or Subgroup | Mean Difference | SE | Weight | Mean Difference<br>IV, Fixed, 95% CI | Mean Difference<br>IV, Fixed, 95% CI | <b>2.1.1 High FENO levels</b> |  |  |  |  |  | Hanania 2013 | 0.39 | 0.1684 | 100.0% | 0.39 [0.06, 0.72] |  | Subtotal (95% CI) |  |  | 100.0% | 0.39 [0.06, 0.72] |  | Heterogeneity: Not applicable<br>Test for overall effect: Z = 2.32 (P = 0.02) |  |  |  |  |  | <b>2.1.2 Low FENO levels</b> |  |  |  |  |  | Hanania 2013 | 0.24 | 0.1684 | 100.0% | 0.24 [-0.09, 0.57] |  | Subtotal (95% CI) |  |  | 100.0% | 0.24 [-0.09, 0.57] |  | Heterogeneity: Not applicable<br>Test for overall effect: Z = 1.43 (P = 0.15) |  |  |  |  |  | Test for subgroup differences: Chi²= 0.40, df= 1 (P = 0.53), I²= 0% |  |  |  |  |  | ⊕⊕○○<br>LOW |  |
| Study or Subgroup                                                                                                                                            | Mean Difference   | SE                   | Weight        | Mean Difference<br>IV, Fixed, 95% CI | Mean Difference<br>IV, Fixed, 95% CI |                      |                                                                                                                                                                                                                                                                                                                                                                                                                                                                                                                                                                                                                                                                                                                                                                                                                                                                                                                                                                                                                                                                                                                                                                                                                                                                                                                                                                                                                                                                                                                                                                                     |         |                   |                   |                   |                 |    |        |                                      |                                      |                               |  |  |  |  |  |              |      |        |        |                   |  |                   |  |  |        |                   |  |                                                                               |  |  |  |  |  |                              |  |  |  |  |  |              |      |        |        |                    |  |                   |  |  |        |                    |  |                                                                               |  |  |  |  |  |                                                                     |  |  |  |  |  |             |  |
| <b>2.1.1 High FENO levels</b>                                                                                                                                |                   |                      |               |                                      |                                      |                      |                                                                                                                                                                                                                                                                                                                                                                                                                                                                                                                                                                                                                                                                                                                                                                                                                                                                                                                                                                                                                                                                                                                                                                                                                                                                                                                                                                                                                                                                                                                                                                                     |         |                   |                   |                   |                 |    |        |                                      |                                      |                               |  |  |  |  |  |              |      |        |        |                   |  |                   |  |  |        |                   |  |                                                                               |  |  |  |  |  |                              |  |  |  |  |  |              |      |        |        |                    |  |                   |  |  |        |                    |  |                                                                               |  |  |  |  |  |                                                                     |  |  |  |  |  |             |  |
| Hanania 2013                                                                                                                                                 | 0.39              | 0.1684               | 100.0%        | 0.39 [0.06, 0.72]                    |                                      |                      |                                                                                                                                                                                                                                                                                                                                                                                                                                                                                                                                                                                                                                                                                                                                                                                                                                                                                                                                                                                                                                                                                                                                                                                                                                                                                                                                                                                                                                                                                                                                                                                     |         |                   |                   |                   |                 |    |        |                                      |                                      |                               |  |  |  |  |  |              |      |        |        |                   |  |                   |  |  |        |                   |  |                                                                               |  |  |  |  |  |                              |  |  |  |  |  |              |      |        |        |                    |  |                   |  |  |        |                    |  |                                                                               |  |  |  |  |  |                                                                     |  |  |  |  |  |             |  |
| Subtotal (95% CI)                                                                                                                                            |                   |                      | 100.0%        | 0.39 [0.06, 0.72]                    |                                      |                      |                                                                                                                                                                                                                                                                                                                                                                                                                                                                                                                                                                                                                                                                                                                                                                                                                                                                                                                                                                                                                                                                                                                                                                                                                                                                                                                                                                                                                                                                                                                                                                                     |         |                   |                   |                   |                 |    |        |                                      |                                      |                               |  |  |  |  |  |              |      |        |        |                   |  |                   |  |  |        |                   |  |                                                                               |  |  |  |  |  |                              |  |  |  |  |  |              |      |        |        |                    |  |                   |  |  |        |                    |  |                                                                               |  |  |  |  |  |                                                                     |  |  |  |  |  |             |  |
| Heterogeneity: Not applicable<br>Test for overall effect: Z = 2.32 (P = 0.02)                                                                                |                   |                      |               |                                      |                                      |                      |                                                                                                                                                                                                                                                                                                                                                                                                                                                                                                                                                                                                                                                                                                                                                                                                                                                                                                                                                                                                                                                                                                                                                                                                                                                                                                                                                                                                                                                                                                                                                                                     |         |                   |                   |                   |                 |    |        |                                      |                                      |                               |  |  |  |  |  |              |      |        |        |                   |  |                   |  |  |        |                   |  |                                                                               |  |  |  |  |  |                              |  |  |  |  |  |              |      |        |        |                    |  |                   |  |  |        |                    |  |                                                                               |  |  |  |  |  |                                                                     |  |  |  |  |  |             |  |
| <b>2.1.2 Low FENO levels</b>                                                                                                                                 |                   |                      |               |                                      |                                      |                      |                                                                                                                                                                                                                                                                                                                                                                                                                                                                                                                                                                                                                                                                                                                                                                                                                                                                                                                                                                                                                                                                                                                                                                                                                                                                                                                                                                                                                                                                                                                                                                                     |         |                   |                   |                   |                 |    |        |                                      |                                      |                               |  |  |  |  |  |              |      |        |        |                   |  |                   |  |  |        |                   |  |                                                                               |  |  |  |  |  |                              |  |  |  |  |  |              |      |        |        |                    |  |                   |  |  |        |                    |  |                                                                               |  |  |  |  |  |                                                                     |  |  |  |  |  |             |  |
| Hanania 2013                                                                                                                                                 | 0.24              | 0.1684               | 100.0%        | 0.24 [-0.09, 0.57]                   |                                      |                      |                                                                                                                                                                                                                                                                                                                                                                                                                                                                                                                                                                                                                                                                                                                                                                                                                                                                                                                                                                                                                                                                                                                                                                                                                                                                                                                                                                                                                                                                                                                                                                                     |         |                   |                   |                   |                 |    |        |                                      |                                      |                               |  |  |  |  |  |              |      |        |        |                   |  |                   |  |  |        |                   |  |                                                                               |  |  |  |  |  |                              |  |  |  |  |  |              |      |        |        |                    |  |                   |  |  |        |                    |  |                                                                               |  |  |  |  |  |                                                                     |  |  |  |  |  |             |  |
| Subtotal (95% CI)                                                                                                                                            |                   |                      | 100.0%        | 0.24 [-0.09, 0.57]                   |                                      |                      |                                                                                                                                                                                                                                                                                                                                                                                                                                                                                                                                                                                                                                                                                                                                                                                                                                                                                                                                                                                                                                                                                                                                                                                                                                                                                                                                                                                                                                                                                                                                                                                     |         |                   |                   |                   |                 |    |        |                                      |                                      |                               |  |  |  |  |  |              |      |        |        |                   |  |                   |  |  |        |                   |  |                                                                               |  |  |  |  |  |                              |  |  |  |  |  |              |      |        |        |                    |  |                   |  |  |        |                    |  |                                                                               |  |  |  |  |  |                                                                     |  |  |  |  |  |             |  |
| Heterogeneity: Not applicable<br>Test for overall effect: Z = 1.43 (P = 0.15)                                                                                |                   |                      |               |                                      |                                      |                      |                                                                                                                                                                                                                                                                                                                                                                                                                                                                                                                                                                                                                                                                                                                                                                                                                                                                                                                                                                                                                                                                                                                                                                                                                                                                                                                                                                                                                                                                                                                                                                                     |         |                   |                   |                   |                 |    |        |                                      |                                      |                               |  |  |  |  |  |              |      |        |        |                   |  |                   |  |  |        |                   |  |                                                                               |  |  |  |  |  |                              |  |  |  |  |  |              |      |        |        |                    |  |                   |  |  |        |                    |  |                                                                               |  |  |  |  |  |                                                                     |  |  |  |  |  |             |  |
| Test for subgroup differences: Chi²= 0.40, df= 1 (P = 0.53), I²= 0%                                                                                          |                   |                      |               |                                      |                                      |                      |                                                                                                                                                                                                                                                                                                                                                                                                                                                                                                                                                                                                                                                                                                                                                                                                                                                                                                                                                                                                                                                                                                                                                                                                                                                                                                                                                                                                                                                                                                                                                                                     |         |                   |                   |                   |                 |    |        |                                      |                                      |                               |  |  |  |  |  |              |      |        |        |                   |  |                   |  |  |        |                   |  |                                                                               |  |  |  |  |  |                              |  |  |  |  |  |              |      |        |        |                    |  |                   |  |  |        |                    |  |                                                                               |  |  |  |  |  |                                                                     |  |  |  |  |  |             |  |

| Certainty assessment                                                                               |                   |                      |               |              |                      |                      | № of patients                                                                                                                                                                                                                                                                                                                                                                                                                                                                                                                                                                                                                                                                                                                                                                                                                                                                                                                                                                                                                                     |         | Effect            |                   | Certainty   | Importance |
|----------------------------------------------------------------------------------------------------|-------------------|----------------------|---------------|--------------|----------------------|----------------------|---------------------------------------------------------------------------------------------------------------------------------------------------------------------------------------------------------------------------------------------------------------------------------------------------------------------------------------------------------------------------------------------------------------------------------------------------------------------------------------------------------------------------------------------------------------------------------------------------------------------------------------------------------------------------------------------------------------------------------------------------------------------------------------------------------------------------------------------------------------------------------------------------------------------------------------------------------------------------------------------------------------------------------------------------|---------|-------------------|-------------------|-------------|------------|
| № of studies                                                                                       | Study design      | Risk of bias         | Inconsistency | Indirectness | Imprecision          | Other considerations | omalizumab                                                                                                                                                                                                                                                                                                                                                                                                                                                                                                                                                                                                                                                                                                                                                                                                                                                                                                                                                                                                                                        | placebo | Relative (95% CI) | Absolute (95% CI) |             |            |
| Change from baseline in % predicted FEV1<br>Follow up: 48 weeks<br>(higher change, better outcome) |                   |                      |               |              |                      |                      |                                                                                                                                                                                                                                                                                                                                                                                                                                                                                                                                                                                                                                                                                                                                                                                                                                                                                                                                                                                                                                                   |         |                   |                   |             |            |
| 1 (394 participants) <sup>1</sup>                                                                  | randomised trials | serious <sup>a</sup> | not serious   | not serious  | serious <sup>b</sup> | none                 | <p>Mean change from baseline to week 48 of omalizumab compared to placebo were: FENO (≥19.5 ppb): Least square mean difference= 3.26 (95% CI: -0.33 to 6.84); p-value= 0.08 FENO (&lt;19.5 ppb): Least square mean difference= 1.97 (95% CI: -1.83 to 5.77); p-value= 0.31 Number of patients: 394; test for subgroup differences: P = 0.63 <sup>c</sup></p> <p>Study or Subgroup Mean Difference SE Weight IV, Fixed, 95% CI</p> <p>2.2.1 High FENO levels</p> <p>Hanania 2013 3.26 1.8317 100.0% 3.26 [-0.33, 6.85]</p> <p>Subtotal (95% CI) 3.26 [-0.33, 6.85]</p> <p>Heterogeneity: Not applicable</p> <p>Test for overall effect: Z = 1.76 (P = 0.08)</p> <p>2.2.2 Low FENO levels</p> <p>Hanania 2013 1.97 1.9309 100.0% 1.97 [-1.83, 5.77]</p> <p>Subtotal (95% CI) 1.97 [-1.83, 5.77]</p> <p>Heterogeneity: Not applicable</p> <p>Test for overall effect: Z = 1.02 (P = 0.31)</p> <p>Test for subgroup differences: ChiP = 0.23, df = 1 (P = 0.63), I<sup>2</sup> = 0%</p>                                                               |         |                   |                   | ⊕⊕○○<br>LOW |            |
| Adverse events<br>Follow up: 48 weeks<br>(higher values, worst outcome)                            |                   |                      |               |              |                      |                      |                                                                                                                                                                                                                                                                                                                                                                                                                                                                                                                                                                                                                                                                                                                                                                                                                                                                                                                                                                                                                                                   |         |                   |                   |             |            |
| 1 (394 participants) <sup>1</sup>                                                                  | randomised trials | serious <sup>a</sup> | not serious   | not serious  | serious <sup>b</sup> | none                 | <p>Percentage of patients with treatment-related adverse events of omalizumab compared to placebo were: FENO (≥19.5 ppb): 80.2% versus 73%; RR= 1.10 (95% CI= 0.94 to 1.28) FENO(&lt;19.5 ppb): 83.5% versus 80%; RR= 1.04 (95% CI= 0.91 to 1.19) Number of patients: 394; test for subgroup differences: P=0.62</p> <p>Study or Subgroup Events Total Events Total Weight M-H, Fixed, 95% CI</p> <p>2.3.1 High FENO levels</p> <p>Hanania 2013 81 101 73 100 100.0% 1.10 [0.94, 1.28]</p> <p>Subtotal (95% CI) 81 101 73 100 100.0% 1.10 [0.94, 1.28]</p> <p>Total events: 81 73</p> <p>Heterogeneity: Not applicable</p> <p>Test for overall effect: Z = 1.36 (P = 0.17)</p> <p>2.3.2 Low FENO levels</p> <p>Hanania 2013 86 103 72 80 100.0% 1.04 [0.91, 1.19]</p> <p>Subtotal (95% CI) 86 103 72 80 100.0% 1.04 [0.91, 1.19]</p> <p>Total events: 86 72</p> <p>Heterogeneity: Not applicable</p> <p>Test for overall effect: Z = 0.82 (P = 0.42)</p> <p>Test for subgroup differences: ChiP = 0.24, df = 1 (P = 0.62), I<sup>2</sup> = 0%</p> |         |                   |                   | ⊕⊕○○<br>LOW |            |

| Certainty assessment                                                                       |                   |                      |               |              |                      |                      | № of patients                                                                                                                                                                                                                                                                                                                                                                                                                                                                                                                                                                                                                                                                                                                 |         | Effect            |                   | Certainty                                           | Importance |
|--------------------------------------------------------------------------------------------|-------------------|----------------------|---------------|--------------|----------------------|----------------------|-------------------------------------------------------------------------------------------------------------------------------------------------------------------------------------------------------------------------------------------------------------------------------------------------------------------------------------------------------------------------------------------------------------------------------------------------------------------------------------------------------------------------------------------------------------------------------------------------------------------------------------------------------------------------------------------------------------------------------|---------|-------------------|-------------------|-----------------------------------------------------|------------|
| № of studies                                                                               | Study design      | Risk of bias         | Inconsistency | Indirectness | Imprecision          | Other considerations | omalizumab                                                                                                                                                                                                                                                                                                                                                                                                                                                                                                                                                                                                                                                                                                                    | placebo | Relative (95% CI) | Absolute (95% CI) |                                                     |            |
| Time to first asthma exacerbation<br>Follow up: 48 weeks<br>(lower values, better outcome) |                   |                      |               |              |                      |                      |                                                                                                                                                                                                                                                                                                                                                                                                                                                                                                                                                                                                                                                                                                                               |         |                   |                   |                                                     |            |
| 1 (394 participants) <sup>1</sup>                                                          | randomised trials | serious <sup>a</sup> | not serious   | not serious  | serious <sup>b</sup> | none                 | Time to first asthma exacerbation of omalizumab compared to placebo were: FENO(≥19.5 ppb): HR= 0.38 (95% CI= 0.24 to 0.61) FENO(<19.5 ppb): HR= 1.0 (95% CI= 0.62 to 1.6) Number of patients: 394; test for subgroup differences: P=0.004                                                                                                                                                                                                                                                                                                                                                                                                                                                                                     |         |                   |                   | <div><div><div>⊕⊕○○</div><div>LOW</div></div></div> |            |
|                                                                                            |                   |                      |               |              |                      |                      | <div><div><div><div><div>Study or Subgroup</div><div>log(Hazard Ratio)</div><div>SE</div><div>Weight</div><div>Hazard Ratio<br/>IV, Fixed, 95% CI</div></div><div><div>2.4.1 High FENO levels</div><div>Hamania 2013</div><div>Subtotal (95% CI)</div><div>Heterogeneity: Not applicable</div><div>Test for overall effect: Z = 4.13 (P = 0.0001)</div></div><div><div>2.4.2 Low FENO levels</div><div>Hamania 2013</div><div>Subtotal (95% CI)</div><div>Heterogeneity: Not applicable</div><div>Test for overall effect: Z = 0.00 (P = 1.00)</div></div></div><div><div>0.01</div><div>0.1</div><div>1</div><div>10</div><div>100</div></div><div><div>Favours omalizumab</div><div>Favours placebo</div></div></div></div> |         |                   |                   |                                                     |            |

CI: Confidence interval

## Explanations

- Risk of bias due to a considerable number of patients was not evaluated at baseline for biomarker levels
- Optimal information size not reached for the main objective (and then for the subgroup analysis), reported by authors
- P values about Test for subgroup differences were estimated in RevMan and assuming that LSM is similar to Mean differences (just for descriptive purposes)

## References

- Hanania NA<sup>1</sup>, Wenzel S, Rosén K, Hsieh HJ, Mosesova S, Choy DF, Lal P, Arron JR, Harris JM, Busse W. Exploring the effects of omalizumab in allergic asthma: an analysis of biomarkers in the EXTRA study. Am J Respir Crit Care Med; 2013.

Evidence to Decision Framework: OMALIZUMAB – PERIOSTIN

|                                                                                                                                                        |                                                                                                                     |             |                                                                                                                                                                                                                                                                                                                                                                                                                                                                                                                                                                                                                                                                                                                                                                                                                                                                                                                                                                                                                                                                                                           |
|--------------------------------------------------------------------------------------------------------------------------------------------------------|---------------------------------------------------------------------------------------------------------------------|-------------|-----------------------------------------------------------------------------------------------------------------------------------------------------------------------------------------------------------------------------------------------------------------------------------------------------------------------------------------------------------------------------------------------------------------------------------------------------------------------------------------------------------------------------------------------------------------------------------------------------------------------------------------------------------------------------------------------------------------------------------------------------------------------------------------------------------------------------------------------------------------------------------------------------------------------------------------------------------------------------------------------------------------------------------------------------------------------------------------------------------|
| Should measurement of Periostin be used to select patients for initiation of a monoclonal anti-IgE strategy in adults and children with severe asthma? |                                                                                                                     |             |                                                                                                                                                                                                                                                                                                                                                                                                                                                                                                                                                                                                                                                                                                                                                                                                                                                                                                                                                                                                                                                                                                           |
| POPULATION:                                                                                                                                            | Adults and children (≥12 years) with severe asthma                                                                  | BACKGROUND: | Until relatively recently treatment options for patients with severe asthma who were refractory to standard treatments have been limited. Over the last two decades there have been major advances in treatment options for patients with severe disease. In the early 2000s omalizumab, a monoclonal antibody therapy that targets and neutralises IgE entered the market. Since that time a number of other monoclonal antibody therapies targeting the T2 pathway have emerged. The treatments have proven efficacy in reducing exacerbations and oral corticosteroid requirements, and improving patient reported outcomes. With multiple treatment options now available it has become increasingly important to ensure that the right targeted treatment is delivered to the right patient with severe asthma. This approach allows for the delivery of personalised or precision medicine. It is now critical to understand the population in which targeted therapies are likely to have the greatest effect. Serum periostin does not appear useful in predicting reponse to anti-IgE treatment. |
| INTERVENTION:                                                                                                                                          | Omalizumab compared to placebo in patients with severe asthma who have serum periostin levels ≥50 ng/ml             |             |                                                                                                                                                                                                                                                                                                                                                                                                                                                                                                                                                                                                                                                                                                                                                                                                                                                                                                                                                                                                                                                                                                           |
| COMPARISON:                                                                                                                                            | Omalizumab in patients with severe asthma who have serum periostin levels <50 ng/ml                                 |             |                                                                                                                                                                                                                                                                                                                                                                                                                                                                                                                                                                                                                                                                                                                                                                                                                                                                                                                                                                                                                                                                                                           |
| MAIN OUTCOMES:                                                                                                                                         | Exacerbation rates, time to first exacerbations, asthma related quality of life, FEV <sub>1</sub> , adverse effects |             |                                                                                                                                                                                                                                                                                                                                                                                                                                                                                                                                                                                                                                                                                                                                                                                                                                                                                                                                                                                                                                                                                                           |

## Assessment

|                       | JUDGEMENT                                                                                                                                                                                                                               | RESEARCH EVIDENCE                                                                                                                                                                                                                                                                                                                                                                                                                                                                                                                                                                                    | ADDITIONAL CONSIDERATIONS |
|-----------------------|-----------------------------------------------------------------------------------------------------------------------------------------------------------------------------------------------------------------------------------------|------------------------------------------------------------------------------------------------------------------------------------------------------------------------------------------------------------------------------------------------------------------------------------------------------------------------------------------------------------------------------------------------------------------------------------------------------------------------------------------------------------------------------------------------------------------------------------------------------|---------------------------|
| DESIRABLE EFFECTS     | <p><b>How substantial are the desirable anticipated effects?</b></p> <ul style="list-style-type: none"> <li>● <b>Trivial</b></li> <li>○ Small</li> <li>○ Moderate</li> <li>○ Large</li> <li>○ Varies</li> <li>○ Don't know</li> </ul>   | <p>Results from research evidence (studies)</p> <p>No differences were detected in terms of relative reduction of exacerbation rates at 48 weeks or FEV1 when omalizumab was compared to placebo in periostin high (50 ng/ml or more) or low (less than 50 ng/ml) patients. There were however improvements in baseline AQLQ scores with omalizumab compared to placebo in patients with low (less than 50 mg/ml) periostin levels at 48 weeks follow-up (MD 0.50 [0.22,0.78]), whereas there are no differences patients with high (50 ng/ml and more) periostin levels (MD 0.10 [-0.19,0.39]).</p> | Panel considerations      |
| UNDESIRABLE EFFECTS   | <p><b>How substantial are the undesirable anticipated effects?</b></p> <ul style="list-style-type: none"> <li>○ Large</li> <li>○ Moderate</li> <li>● <b>Small</b></li> <li>○ Trivial</li> <li>○ Varies</li> <li>○ Don't know</li> </ul> |                                                                                                                                                                                                                                                                                                                                                                                                                                                                                                                                                                                                      |                           |
| CERTAINTY OF EVIDENCE | <p><b>What is the overall certainty of the evidence of effects?</b></p> <ul style="list-style-type: none"> <li>○ Very low</li> <li>● <b>Low</b></li> <li>○ Moderate</li> <li>○ High</li> <li>○ No included studies</li> </ul>           | <p>The risk of bias was high for completeness of data, due to a considerable number of patients that were not evaluated at baseline for biomarker levels.</p>                                                                                                                                                                                                                                                                                                                                                                                                                                        |                           |
| VALUES                | <p><b>Is there important uncertainty about or variability in how much people value the main outcomes?</b></p> <ul style="list-style-type: none"> <li>● <b>Important uncertainty or variability</b></li> </ul>                           | <p>The test -Serum Periostin: In a study which aimed to evaluate the patient perception of tests used for the assessment of asthma and COPD venipuncture had a reasonable assessment profile, it was rated as more painful than comparator tests eg. Questionnaires but was acceptable in terms of comfort, difficulty and time taken to do the test<sup>1</sup>.</p>                                                                                                                                                                                                                                |                           |

|                    |                                                                                                                                                                                                                                                                                                                                                                                                                                          |                                                                                                                                                                                                                                                                                                                                                                                                                                                                                                                                                                                                                                                                                                                                                                                                                                                                                                                                                                                                                                                    |                                                       |
|--------------------|------------------------------------------------------------------------------------------------------------------------------------------------------------------------------------------------------------------------------------------------------------------------------------------------------------------------------------------------------------------------------------------------------------------------------------------|----------------------------------------------------------------------------------------------------------------------------------------------------------------------------------------------------------------------------------------------------------------------------------------------------------------------------------------------------------------------------------------------------------------------------------------------------------------------------------------------------------------------------------------------------------------------------------------------------------------------------------------------------------------------------------------------------------------------------------------------------------------------------------------------------------------------------------------------------------------------------------------------------------------------------------------------------------------------------------------------------------------------------------------------------|-------------------------------------------------------|
|                    | <ul style="list-style-type: none"> <li>○ Possibly important uncertainty or variability</li> <li>○ Probably no important uncertainty or variability</li> <li>○ No important uncertainty or variability</li> <li>○ No known undesirable outcomes</li> </ul>                                                                                                                                                                                | The intervention did not lead to improvements in some outcomes that are valued by consumers in the biomarker high group, although there were larger quality of life improvements in the biomarker low group.                                                                                                                                                                                                                                                                                                                                                                                                                                                                                                                                                                                                                                                                                                                                                                                                                                       |                                                       |
| BALANCE OF EFFECTS | <p><b>Does the balance between desirable and undesirable effects favor the intervention or the comparison?</b></p> <ul style="list-style-type: none"> <li>○ Favors the comparison</li> <li>○ Probably favors the comparison</li> <li>● <b>Does not favor either the intervention or the comparison</b></li> <li>○ Probably favors the intervention</li> <li>○ Favors the intervention</li> <li>○ Varies</li> <li>○ Don't know</li> </ul> | <p>There were no differences in terms of % predicted FEV1 mean change at 48 weeks of follow-up, when omalizumab is compared to placebo in high (50 ng/ml or more) or low (less than 50 ng/ml) periostin levels at baseline.</p> <p>There were no difference in time to first asthma exacerbation with omalizumab compared to placebo in those patients with high (50 ng/ml or more) or low (less than 50 ng/ml) periostin levels at the same follow-up. In addition, there are no statistically significant differences between these subgroups</p> <p>There were no differences in the adverse effects in patients treated with omalizumab versus placebo irrespective of high or low periostin.</p> <p>There was a significant mean change of baseline AQLQ scores with omalizumab compared to placebo in those patients with low (less than 50 ng/ml) periostin levels at 48 weeks follow-up, whereas there were no differences in the same outcome for those patients with high (50 ng/ml and more) periostin levels at the same follow-up</p> |                                                       |
| COST EFFECTIVENESS | <p><b>Does the cost-effectiveness of the intervention favor the intervention or the comparison?</b></p> <ul style="list-style-type: none"> <li>○ Favors the comparison</li> <li>○ Probably favors the comparison</li> <li>○ Does not favor either the intervention or the comparison</li> <li>○ Probably favors the intervention</li> <li>○ Favors the intervention</li> <li>○ Varies</li> <li>● <b>No included studies</b></li> </ul>   | No research evidence identified.                                                                                                                                                                                                                                                                                                                                                                                                                                                                                                                                                                                                                                                                                                                                                                                                                                                                                                                                                                                                                   | There would be an additional cost of using Periostin. |



|                                             |                                                                                                                                                                                                                                                                                         |                                  |                                                                                                                                                                                                                               |
|---------------------------------------------|-----------------------------------------------------------------------------------------------------------------------------------------------------------------------------------------------------------------------------------------------------------------------------------------|----------------------------------|-------------------------------------------------------------------------------------------------------------------------------------------------------------------------------------------------------------------------------|
| CERTAINTY OF EVIDENCE OF REQUIRED RESOURCES | <p><b>What is the certainty of the evidence of resource requirements (costs)?</b></p> <ul style="list-style-type: none"> <li>○ Very low</li> <li>○ Low</li> <li>○ Moderate</li> <li>○ High</li> <li>● <b>No included studies</b></li> </ul>                                             | No research evidence identified. | There would be an additional cost of using Periostin.                                                                                                                                                                         |
| EQUITY                                      | <p><b>What would be the impact on health equity?</b></p> <ul style="list-style-type: none"> <li>○ <b>Reduced</b></li> <li>○ Probably reduced</li> <li>○ Probably no impact</li> <li>○ Probably increased</li> <li>● <b>Increased</b></li> <li>○ Varies</li> <li>○ Don't know</li> </ul> | No research evidence identified. | Periostin is currently not available and is not applicable in children                                                                                                                                                        |
| ACCEPTABILITY                               | <p><b>Is the intervention acceptable to key stakeholders?</b></p> <ul style="list-style-type: none"> <li>● <b>No</b></li> <li>○ Probably no</li> <li>○ Probably yes</li> <li>○ Yes</li> <li>○ Varies</li> <li>○ Don't know</li> </ul>                                                   | No research evidence identified. | <p>Periostin is currently only available for research and is not applicable to children.</p> <p>There is no evidence that periostin levels are useful in predicting exacerbation and lung function response to treatment.</p> |
| FEASIBILITY                                 | <p><b>Is the intervention feasible to implement?</b></p> <ul style="list-style-type: none"> <li>● <b>No</b></li> <li>○ Probably no</li> <li>○ Probably yes</li> <li>○ Yes</li> <li>○ Varies</li> <li>○ Don't know</li> </ul>                                                            | No research evidence identified. | At present periostin is only available in research setting and is not applicable to children.                                                                                                                                 |

#### Reference

- McDonald VM, Simpson JL, McElduff P, Gibson PG. Older peoples' perception of tests used in the assessment and management of COPD and asthma. *Clin Respir J* 2013; **20**(10): 12017.



## Evidence to Decision Framework: OMALIZUMAB – EOSINOPHILS

Should measurement of blood eosinophils be used to select patients for initiation of a monoclonal anti-IgE strategy in adults and children with severe asthma?

|                                                                                                                                                                                                                                                                                                                                                                                                                                                                                                                                |                                                                                                                                                                                                                                                                                                                                                                                                                                                                                                                                                                                                                                                                                                                                                                                                                                                                                                                                                                                                                                                                                                                                                                                                          |
|--------------------------------------------------------------------------------------------------------------------------------------------------------------------------------------------------------------------------------------------------------------------------------------------------------------------------------------------------------------------------------------------------------------------------------------------------------------------------------------------------------------------------------|----------------------------------------------------------------------------------------------------------------------------------------------------------------------------------------------------------------------------------------------------------------------------------------------------------------------------------------------------------------------------------------------------------------------------------------------------------------------------------------------------------------------------------------------------------------------------------------------------------------------------------------------------------------------------------------------------------------------------------------------------------------------------------------------------------------------------------------------------------------------------------------------------------------------------------------------------------------------------------------------------------------------------------------------------------------------------------------------------------------------------------------------------------------------------------------------------------|
| <p><b>POPULATION:</b> Adults and children (≥12 years) with severe asthma</p> <p><b>INTERVENTION:</b> Measurement of blood eosinophil counts and treatment with Omalizumab in patients with severe asthma who have ≥260/μl</p> <p><b>COMPARISON:</b> Measurement of blood eosinophil counts and treatment with Omalizumab in patients with severe asthma who have &lt;260/μl</p> <p><b>MAIN OUTCOMES:</b> Exacerbation rates, time to first exacerbations, asthma related quality of life, FEV<sub>1</sub>, adverse effects</p> | <p><b>BACKGROUND:</b> Until relatively recently treatment options for patients with severe asthma who were refractory to standard treatments have been limited. Over the last two decades there have been major advances in treatment options for patients with severe disease. In the early 2000s omalizumab, a monoclonal antibody therapy that targets and neutralises IgE entered the market. Since that time a number of other monoclonal antibody therapies targeting the T2 pathway have emerged. The treatments have proven efficacy in reducing exacerbations and oral corticosteroid requirements, and improving patient reported outcomes. With multiple treatment options now available it has become increasingly important to ensure that the right targeted treatment is delivered to the right patient with severe asthma. This approach allows for the delivery of personalised or precision medicine. It is now critical to understand the population in which targeted therapies are likely to have the greatest effect. An elevation of peripheral blood eosinophils can be used as a biomarker to predict response to anti-IgE treatment and enable this personalised approach.</p> |
|--------------------------------------------------------------------------------------------------------------------------------------------------------------------------------------------------------------------------------------------------------------------------------------------------------------------------------------------------------------------------------------------------------------------------------------------------------------------------------------------------------------------------------|----------------------------------------------------------------------------------------------------------------------------------------------------------------------------------------------------------------------------------------------------------------------------------------------------------------------------------------------------------------------------------------------------------------------------------------------------------------------------------------------------------------------------------------------------------------------------------------------------------------------------------------------------------------------------------------------------------------------------------------------------------------------------------------------------------------------------------------------------------------------------------------------------------------------------------------------------------------------------------------------------------------------------------------------------------------------------------------------------------------------------------------------------------------------------------------------------------|

## Assessment

|                       | JUDGEMENT                                                                                                                                                                                                                               | RESEARCH EVIDENCE                                                                                                                                                                                                                                                                                                                                                                                                                                                                                                                                                                                                                                                                                                                                                                                                                                                                                                                                                                                                                                                                                                                                                                                                                                                                                                                                                                                                                                                                    | ADDITIONAL CONSIDERATIONS |
|-----------------------|-----------------------------------------------------------------------------------------------------------------------------------------------------------------------------------------------------------------------------------------|--------------------------------------------------------------------------------------------------------------------------------------------------------------------------------------------------------------------------------------------------------------------------------------------------------------------------------------------------------------------------------------------------------------------------------------------------------------------------------------------------------------------------------------------------------------------------------------------------------------------------------------------------------------------------------------------------------------------------------------------------------------------------------------------------------------------------------------------------------------------------------------------------------------------------------------------------------------------------------------------------------------------------------------------------------------------------------------------------------------------------------------------------------------------------------------------------------------------------------------------------------------------------------------------------------------------------------------------------------------------------------------------------------------------------------------------------------------------------------------|---------------------------|
| DESIRABLE EFFECTS     | <p><b>How substantial are the desirable anticipated effects?</b></p> <ul style="list-style-type: none"> <li>○ Trivial</li> <li>○ Small</li> <li>○ Moderate</li> <li>● <b>Large</b></li> <li>○ Varies</li> <li>○ Don't know</li> </ul>   | <p>Results from research evidence (studies)</p> <p>Included in the evidence synthesis were two randomised controlled trials. Pooling of the studies was not possible. In one study<sup>1</sup> using there were improvements in exacerbations rates (HR 0.41 [0.20, 0.84]) and a small but significantly greater change in FEV1 predicted at 24 weeks (MD 7.35 [1.38, 13.32]) with omalizumab compared to placebo in patients with a high eosinophil count (<math>\geq 300/\mu\text{L}</math>), whereas there were no differences in patients with low eosinophils (<math>&lt; 300/\mu\text{L}</math>).</p> <p>In another RCT<sup>2</sup> there was a significantly longer time to first asthma exacerbation with omalizumab compared to placebo in patients with high (260/uL or more) eosinophil count at 48 weeks follow-up (HR 0.64 [0.48, 0.85]), whereas there were no differences in patients with low (less than 260/uL) eosinophil count (HR 0.95 [0.68, 1.33]). However, there were no statistically significant differences between these subgroups.</p> <p>There were no differences in terms of percentage of treatment-related adverse events at 48 weeks of follow-up, when omalizumab is compared to placebo in patients with high or low blood eosinophils.</p> <p>Undergoing a test for peripheral blood eosinophils involves venepuncture which may be more painful than not having a blood test, as such there may be small undesirable effects of the test.</p> | Panel considerations      |
| UNDESIRABLE EFFECTS   | <p><b>How substantial are the undesirable anticipated effects?</b></p> <ul style="list-style-type: none"> <li>○ Large</li> <li>○ Moderate</li> <li>● <b>Small</b></li> <li>○ Trivial</li> <li>○ Varies</li> <li>○ Don't know</li> </ul> |                                                                                                                                                                                                                                                                                                                                                                                                                                                                                                                                                                                                                                                                                                                                                                                                                                                                                                                                                                                                                                                                                                                                                                                                                                                                                                                                                                                                                                                                                      |                           |
| CERTAINTY OF EVIDENCE | <p><b>What is the overall certainty of the evidence of effects?</b></p> <ul style="list-style-type: none"> <li>○ Very low</li> <li>● <b>Low</b></li> <li>○ Moderate</li> <li>○ High</li> <li>○ No included studies</li> </ul>           | <p>The risk of bias was high for completeness of data, due to a considerable number of patients that were not evaluated at baseline for blood eosinophils.</p>                                                                                                                                                                                                                                                                                                                                                                                                                                                                                                                                                                                                                                                                                                                                                                                                                                                                                                                                                                                                                                                                                                                                                                                                                                                                                                                       |                           |
| VALUES                | <p><b>Is there important uncertainty about or variability in how much people value the main outcomes?</b></p> <ul style="list-style-type: none"> <li>○ Important uncertainty or variability</li> </ul>                                  | <p>The test - peripheral blood eosinophils: In a study which aimed to evaluate the patient perception of tests used for the assessment of asthma and COPD, venipuncture had a reasonable assessment profile, it was rated as more painful than the comparator tests eg. Questionnaires, but was acceptable in terms of comfort, difficulty and time taken to do</p>                                                                                                                                                                                                                                                                                                                                                                                                                                                                                                                                                                                                                                                                                                                                                                                                                                                                                                                                                                                                                                                                                                                  |                           |

|                                             |                                                                                                                                                                                                                                                                                                                                                                                                                                          |                                                                                                                                                                                                                                                                                                                                                                                        |                                                                                                                                                                                                                                            |
|---------------------------------------------|------------------------------------------------------------------------------------------------------------------------------------------------------------------------------------------------------------------------------------------------------------------------------------------------------------------------------------------------------------------------------------------------------------------------------------------|----------------------------------------------------------------------------------------------------------------------------------------------------------------------------------------------------------------------------------------------------------------------------------------------------------------------------------------------------------------------------------------|--------------------------------------------------------------------------------------------------------------------------------------------------------------------------------------------------------------------------------------------|
|                                             | <ul style="list-style-type: none"> <li>● Possibly important uncertainty or variability</li> <li>○ <b>Probably no important uncertainty or variability</b></li> <li>○ No important uncertainty or variability</li> <li>○ No known undesirable outcomes</li> </ul>                                                                                                                                                                         | <p>the test<sup>3</sup>.</p> <p>The intervention led to improvements in outcomes that are highly valued by the consumer, as rated by the representatives on the Taskforce. In a study in severe asthma evaluating which outcomes matter to patients, reduced exacerbations and improved quality of life were viewed amongst their highest priorities (Clark V et. al, TSANZ 2019).</p> |                                                                                                                                                                                                                                            |
| BALANCE OF EFFECTS                          | <p><b>Does the balance between desirable and undesirable effects favor the intervention or the comparison?</b></p> <ul style="list-style-type: none"> <li>○ Favors the comparison</li> <li>○ Probably favors the comparison</li> <li>○ Does not favor either the intervention or the comparison</li> <li>○ Probably favors the intervention</li> <li>● <b>Favors the intervention</b></li> <li>○ Varies</li> <li>○ Don't know</li> </ul> | <p>People in the high and low eosinophil groups both experienced adverse effects, with no differences according to their subgroups. People in the eosinophil high group received the clinical benefit without any increase in side effects, whereas the low eosinophil group experienced the same side effects without the clinical benefit.</p>                                       |                                                                                                                                                                                                                                            |
| COST EFFECTIVENESS                          | <p><b>Does the cost-effectiveness of the intervention favor the intervention or the comparison?</b></p> <ul style="list-style-type: none"> <li>○ Favors the comparison</li> <li>○ Probably favors the comparison</li> <li>○ Does not favor either the intervention or the comparison</li> <li>○ Probably favors the intervention</li> <li>● <b>Favors the intervention</b></li> <li>○ Varies</li> <li>○ No included studies</li> </ul>   | <p>No research evidence identified.</p>                                                                                                                                                                                                                                                                                                                                                | <p>The intervention (measurement of eosinophils in the blood) is a low cost intervention that is already routinely used in practice in this population.</p>                                                                                |
| CERTAINTY OF EVIDENCE OF REQUIRED RESOURCES | <p><b>What is the certainty of the evidence of resource requirements (costs)?</b></p> <ul style="list-style-type: none"> <li>○ Very low</li> <li>○ Low</li> <li>● <b>Moderate</b></li> <li>○ High</li> <li>○ No included studies</li> </ul>                                                                                                                                                                                              | <p>No research evidence identified.</p>                                                                                                                                                                                                                                                                                                                                                | <p>While no studies evaluated the evidence of resource requirements the certainty is high as blood eosinophil counts are a low cost test already used in most areas of medicine, as the biomarker is included in the full blood count.</p> |

|               |                                                                                                                                                                                                                                                                                  |                                  |                                                                                                                                                                            |
|---------------|----------------------------------------------------------------------------------------------------------------------------------------------------------------------------------------------------------------------------------------------------------------------------------|----------------------------------|----------------------------------------------------------------------------------------------------------------------------------------------------------------------------|
| EQUITY        | <p><b>What would be the impact on health equity?</b></p> <ul style="list-style-type: none"> <li>○ Reduced</li> <li>○ Probably reduced</li> <li>● <b>Probably no impact</b></li> <li>○ Probably increased</li> <li>○ Increased</li> <li>○ Varies</li> <li>○ Don't know</li> </ul> | No research evidence identified. | The measurement of peripheral blood eosinophil counts is low cost and readily accessible, so all patients are likely to have the biomarker measured.                       |
| ACCEPTABILITY | <p><b>Is the intervention acceptable to key stakeholders?</b></p> <ul style="list-style-type: none"> <li>○ No</li> <li>○ Probably no</li> <li>○ Probably yes</li> <li>● <b>Yes</b></li> <li>○ Varies</li> <li>○ Don't know</li> </ul>                                            | No research evidence identified. | The test is already available as a standard medical assessment at a low cost, so the use of this biomarker should not disadvantage any minority groups.                    |
| FEASIBILITY   | <p><b>Is the intervention feasible to implement?</b></p> <ul style="list-style-type: none"> <li>○ No</li> <li>○ Probably no</li> <li>○ Probably yes</li> <li>● <b>Yes</b></li> <li>○ Varies</li> <li>○ Don't know</li> </ul>                                                     | No research evidence identified. | There are likely to be few limitations since this test is already freely available, low cost, already used in practice and generally acceptable to patients <sup>3</sup> . |

## Reference

1. Busse W, Spector S, Rosen K, Wang Y, Alpan O. High eosinophil count: a potential biomarker for assessing successful omalizumab treatment effects. *The Journal of allergy and clinical immunology* 2013; **132**(2): 485-6.e11.
2. Hanania NA, Wenzel S, Rosen K, et al. Exploring the effects of omalizumab in allergic asthma: an analysis of biomarkers in the EXTRA study. *American journal of respiratory and critical care medicine* 2013; **187**(8): 804-11.
3. McDonald VM, Simpson JL, McElduff P, Gibson PG. Older peoples' perception of tests used in the assessment and management of COPD and asthma. *Clin Respir J* 2013; **20**(10): 12017.

## Evidence to Decision Framework: OMALIZUMAB – FeNO

Should measurement of exhaled NO be used to select patients for initiation of a monoclonal anti-IgE strategy in adults and children with severe asthma?

|                       |                                                                                                                     |                    |                                                                                                                                                                                                                                                                                                                                                                                                                                                                                                                                                                                                                                                                                                                                                                                                                                                                                                                                                                                                                                                                                                                                                                  |
|-----------------------|---------------------------------------------------------------------------------------------------------------------|--------------------|------------------------------------------------------------------------------------------------------------------------------------------------------------------------------------------------------------------------------------------------------------------------------------------------------------------------------------------------------------------------------------------------------------------------------------------------------------------------------------------------------------------------------------------------------------------------------------------------------------------------------------------------------------------------------------------------------------------------------------------------------------------------------------------------------------------------------------------------------------------------------------------------------------------------------------------------------------------------------------------------------------------------------------------------------------------------------------------------------------------------------------------------------------------|
| <b>POPULATION:</b>    | Adults and children (≥12 years) with severe asthma                                                                  | <b>BACKGROUND:</b> | Until relatively recently treatment options for patients with severe asthma who were refractory to standard treatments have been limited. Over the last two decades there have been major advances in treatment options for patients with severe disease. In the early 2000s omalizumab, a monoclonal antibody therapy that targets and neutralises IgE entered the market. Since that time a number of other monoclonal antibody therapies targeting the T2 pathway have emerged. The treatments have proven efficacy in reducing exacerbations and oral corticosteroid requirements, and improving patient reported outcomes. With multiple treatment options now available it has become increasingly important to ensure that the right targeted treatment is delivered to the right patient with severe asthma. This approach allows for the delivery of personalised or precision medicine. It is now critical to understand the population in which targeted therapies are likely to have the greatest effect. An elevation of FeNO ≥19.5 ppb can be used as a biomarker to predict response to anti-IgE treatment and enable this personalised approach. |
| <b>INTERVENTION:</b>  | Omalizumab compared to placebo in FeNO high (≥19.5 ppb) patients with severe asthma                                 |                    |                                                                                                                                                                                                                                                                                                                                                                                                                                                                                                                                                                                                                                                                                                                                                                                                                                                                                                                                                                                                                                                                                                                                                                  |
| <b>COMPARISON:</b>    | Omalizumab compared to placebo in FeNO high (<19.5 ppb) patients with severe asthma                                 |                    |                                                                                                                                                                                                                                                                                                                                                                                                                                                                                                                                                                                                                                                                                                                                                                                                                                                                                                                                                                                                                                                                                                                                                                  |
| <b>MAIN OUTCOMES:</b> | Exacerbation rates, time to first exacerbations, asthma related quality of life, FEV <sub>1</sub> , adverse effects |                    |                                                                                                                                                                                                                                                                                                                                                                                                                                                                                                                                                                                                                                                                                                                                                                                                                                                                                                                                                                                                                                                                                                                                                                  |

## Assessment

|                     | JUDGEMENT                                                                                                                                                                                                                               | RESEARCH EVIDENCE                                                                                                                                                                                                                                                                                                                                                                                                                                                                                                                                                                                                                                                                                                                                                                                                                                                                                                                                                                                                                                                                                                            | ADDITIONAL CONSIDERATIONS                                                                                                                                                                           |
|---------------------|-----------------------------------------------------------------------------------------------------------------------------------------------------------------------------------------------------------------------------------------|------------------------------------------------------------------------------------------------------------------------------------------------------------------------------------------------------------------------------------------------------------------------------------------------------------------------------------------------------------------------------------------------------------------------------------------------------------------------------------------------------------------------------------------------------------------------------------------------------------------------------------------------------------------------------------------------------------------------------------------------------------------------------------------------------------------------------------------------------------------------------------------------------------------------------------------------------------------------------------------------------------------------------------------------------------------------------------------------------------------------------|-----------------------------------------------------------------------------------------------------------------------------------------------------------------------------------------------------|
| DESIRABLE EFFECTS   | <p><b>How substantial are the desirable anticipated effects?</b></p> <ul style="list-style-type: none"> <li>○ Trivial</li> <li>○ Small</li> <li>○ Moderate</li> <li>● <b>Large</b></li> <li>○ Varies</li> <li>○ Don't know</li> </ul>   | <p>Results from research evidence (studies)</p> <p>Only one RCT was included in this evidence synthesis</p> <p>There was a significant relative reduction of exacerbation rates with omalizumab compared to placebo in patients with high (19.5 ppb or more) FENO level at 48 weeks follow-up (53% [95% CI 37-70]); p=0.001, whereas there were no differences for those patients with low (less than 19.5 ppb) FENO levels (16% [95% CI: -32 to 46]); p= 0.45. The time to first asthma exacerbation with omalizumab compared to placebo was significantly longer in patients with high (19.5 ppb or more) FENO level at 48 weeks follow-up (HR 0.38 [0.24, 0.60]), whereas there were no differences in patients with low (less than 19.5 ppb) FENO (HR 1.00 [0.62, 1.61]). There were also larger changes of mean AQLQ with omalizumab compared to placebo in FeNO high patients (19.5 ppb or more) at 48 weeks of follow-up (MD 0.39 [0.06, 0.72]), whereas there were no differences in FeNO low patients (less than 19.5 ppb) (MD 0.24 [-0.09, 0.57]).</p> <p>Only one RCT was included in this evidence synthesis</p> |                                                                                                                                                                                                     |
| UNDESIRABLE EFFECTS | <p><b>How substantial are the undesirable anticipated effects?</b></p> <ul style="list-style-type: none"> <li>○ Large</li> <li>○ Moderate</li> <li>● <b>Small</b></li> <li>○ Trivial</li> <li>○ Varies</li> <li>○ Don't know</li> </ul> |                                                                                                                                                                                                                                                                                                                                                                                                                                                                                                                                                                                                                                                                                                                                                                                                                                                                                                                                                                                                                                                                                                                              | <p>There are no differences in terms of percentage of treatment-related adverse events at 48 weeks of follow-up, when omalizumab is compared to placebo in high or low FENO levels at baseline.</p> |



|                       |                                                                                                                                                                                                                                                                                                                                                                                                                                   |                                                                                                                                                                                                                                                                                                                                                                                                                                                                                                                                                                                                                                                                                                         |                                                                                                                                                                                                                                                                                                                                           |
|-----------------------|-----------------------------------------------------------------------------------------------------------------------------------------------------------------------------------------------------------------------------------------------------------------------------------------------------------------------------------------------------------------------------------------------------------------------------------|---------------------------------------------------------------------------------------------------------------------------------------------------------------------------------------------------------------------------------------------------------------------------------------------------------------------------------------------------------------------------------------------------------------------------------------------------------------------------------------------------------------------------------------------------------------------------------------------------------------------------------------------------------------------------------------------------------|-------------------------------------------------------------------------------------------------------------------------------------------------------------------------------------------------------------------------------------------------------------------------------------------------------------------------------------------|
| CERTAINTY OF EVIDENCE | <p><b>What is the overall certainty of the evidence of effects?</b></p> <ul style="list-style-type: none"> <li>○ Very low</li> <li>● Low</li> <li>○ Moderate</li> <li>○ High</li> <li>○ No included studies</li> </ul>                                                                                                                                                                                                            | <p>The risk of bias was high for completeness of data, due to a considerable number of patients that were not evaluated at baseline for their FeNO level.</p>                                                                                                                                                                                                                                                                                                                                                                                                                                                                                                                                           | <p>Each analysis only included single RCTs of patients with severe asthma eligible for anti-IgE treatment.</p>                                                                                                                                                                                                                            |
| VALUES                | <p><b>Is there important uncertainty about or variability in how much people value the main outcomes?</b></p> <ul style="list-style-type: none"> <li>○ Important uncertainty or variability</li> <li>● Possibly important uncertainty or variability</li> <li>○ Probably no important uncertainty or variability</li> <li>○ No important uncertainty or variability</li> <li>○ No known undesirable outcomes</li> </ul>           | <p>The test - FeNO: In a study which aimed to evaluate the patient perception of tests used for the assessment of asthma and COPD, FeNO had a good assessment profile, with a favourable assessment overall compared to completing questionnaires and only being associated with some difficulty in test performance<sup>1</sup>.</p> <p>The intervention lead to improvements in outcomes that are highly valued by the consumer, as rated by the representatives on this Taskforce. In a study in severe asthma evaluating which outcomes matter to patients, reduced exacerbations and improved quality of life were viewed amongst their highest priorities (Clark <i>V et al</i>, TSANZ 2019).</p> |                                                                                                                                                                                                                                                                                                                                           |
| BALANCE OF EFFECTS    | <p><b>Does the balance between desirable and undesirable effects favor the intervention or the comparison?</b></p> <ul style="list-style-type: none"> <li>○ Favors the comparison</li> <li>○ Probably favors the comparison</li> <li>○ Does not favor either the intervention or the comparison</li> <li>○ Probably favors the intervention</li> <li>● Favors the intervention</li> <li>○ Varies</li> <li>○ Don't know</li> </ul> |                                                                                                                                                                                                                                                                                                                                                                                                                                                                                                                                                                                                                                                                                                         | <p>Their were no differences in the adverse effects in patients treated with omalizumab versus placebo irrespective of high or low FeNO. People in the FeNO high group received the clinical benefit without any increase in side effects, whereas the low FeNO group experienced the same side effects without the clinical benefit.</p> |
| COST EFFECTIVENESS    | <p><b>Does the cost-effectiveness of the intervention favor the intervention or the comparison?</b></p> <ul style="list-style-type: none"> <li>○ Favors the comparison</li> <li>○ Probably favors the comparison</li> <li>○ Does not favor either the intervention or the comparison</li> <li>○ Probably favors the intervention</li> <li>○ Favors the intervention</li> <li>○ Varies</li> <li>● No included studies</li> </ul>   | <p>No research evidence identified.</p>                                                                                                                                                                                                                                                                                                                                                                                                                                                                                                                                                                                                                                                                 | <p>There would be an additional cost of using FeNO to select patients for the treatment in non specialist centres. However, in specialist centres FeNO is commonly assessed. If the test is used to select patients most likely to respond, cost benefits are likely.</p>                                                                 |

|                                             |                                                                                                                                                                                                                                                                                  |                                                                                                                                                                                                                                                                                                                                                                                                                                                                                                                                              |                                                                                                                                                                                                   |
|---------------------------------------------|----------------------------------------------------------------------------------------------------------------------------------------------------------------------------------------------------------------------------------------------------------------------------------|----------------------------------------------------------------------------------------------------------------------------------------------------------------------------------------------------------------------------------------------------------------------------------------------------------------------------------------------------------------------------------------------------------------------------------------------------------------------------------------------------------------------------------------------|---------------------------------------------------------------------------------------------------------------------------------------------------------------------------------------------------|
|                                             |                                                                                                                                                                                                                                                                                  |                                                                                                                                                                                                                                                                                                                                                                                                                                                                                                                                              |                                                                                                                                                                                                   |
| CERTAINTY OF EVIDENCE OF REQUIRED RESOURCES | <p><b>What is the certainty of the evidence of resource requirements (costs)?</b></p> <ul style="list-style-type: none"> <li>○ Very low</li> <li>○ Low</li> <li>○ Moderate</li> <li>○ High</li> <li>● <b>No included studies</b></li> </ul>                                      | No research evidence identified.                                                                                                                                                                                                                                                                                                                                                                                                                                                                                                             | Cost of the test may limit widescale implementation.                                                                                                                                              |
| EQUITY                                      | <p><b>What would be the impact on health equity?</b></p> <ul style="list-style-type: none"> <li>○ Reduced</li> <li>● <b>Probably reduced</b></li> <li>○ Probably no impact</li> <li>○ Probably increased</li> <li>○ Increased</li> <li>○ Varies</li> <li>○ Don't know</li> </ul> | No research evidence identified.                                                                                                                                                                                                                                                                                                                                                                                                                                                                                                             | There is no evidence of an impact on health equity, however given the lack of widespread FeNO use, some groups may not have access to the test.                                                   |
| ACCEPTABILITY                               | <p><b>Is the intervention acceptable to key stakeholders?</b></p> <ul style="list-style-type: none"> <li>○ No</li> <li>○ Probably no</li> <li>● <b>Probably yes</b></li> <li>○ Yes</li> <li>○ Varies</li> <li>○ Don't know</li> </ul>                                            | <p>Previous ERS/ATS Taskforce recommends against the use of FeNO to guide therapy of adults and children with severe asthma. This may impact acceptability<sup>2</sup>.</p> <p>In terms of patient acceptability, a study which aimed to evaluate the patient perception of tests used for the assessment of asthma and COPD, found that FENO had a good assessment profile, with a favourable assessment overall compared to completing questionnaires, and only being associated with some difficulty in test performance<sup>1</sup>.</p> | As treatment of omalizumab is initiated in specialist severe asthma clinics and FeNO is a common measure used in these clinics, it is likely that this is acceptable to severe asthma clinicians. |

|             |                                                                                                                                                                                                                              |                                  |                                                      |
|-------------|------------------------------------------------------------------------------------------------------------------------------------------------------------------------------------------------------------------------------|----------------------------------|------------------------------------------------------|
|             |                                                                                                                                                                                                                              |                                  |                                                      |
| FEASIBILITY | <p><b>Is the intervention feasible to implement?</b></p> <ul style="list-style-type: none"> <li>○ No</li> <li>○ Probably no</li> <li>● <b>Probably yes</b></li> <li>○ Yes</li> <li>○ Varies</li> <li>○ Don't know</li> </ul> | No research evidence identified. | Cost of the test may limit widescale implementation. |

## References

1. McDonald VM, Simpson JL, McElduff P, Gibson PG. Older peoples' perception of tests used in the assessment and management of COPD and asthma. *Clin Respir J* 2013; **20**(10): 12017.
2. Chung KF, Wenzel SE, Brozek JL, et al. International ERS/ATS guidelines on definition, evaluation and treatment of severe asthma. *The European respiratory journal* 2014; (43): 343-73.

## Should a long-acting inhaled muscarinic antagonist (LAMA) be used in adults and children with severe asthma?

GRADE Evidence Profile: LAMA (tiotropium)

| Certainty assessment |              |              |               |              |             |                      | No of patients    |         | Effect            |                   | Certainty | Importance |
|----------------------|--------------|--------------|---------------|--------------|-------------|----------------------|-------------------|---------|-------------------|-------------------|-----------|------------|
| No of studies        | Study design | Risk of bias | Inconsistency | Indirectness | Imprecision | Other considerations | LAMA (tiotropium) | placebo | Relative (95% CI) | Absolute (95% CI) |           |            |

### Peak FEV1 response - Children 2.5 ug

|                |                   |                      |             |             |             |      |     |     |                                                      |                  |          |
|----------------|-------------------|----------------------|-------------|-------------|-------------|------|-----|-----|------------------------------------------------------|------------------|----------|
| 1 <sup>1</sup> | randomised trials | serious <sup>a</sup> | not serious | not serious | not serious | none | 135 | 130 | MD <b>35 higher</b><br>(27.99 lower to 97.99 higher) | ⊕⊕⊕○<br>MODERATE | CRITICAL |
|----------------|-------------------|----------------------|-------------|-------------|-------------|------|-----|-----|------------------------------------------------------|------------------|----------|

### Peak FEV1 response - Adolescents 2.5 ug

|                |                   |             |             |             |                      |      |     |     |                                                        |                  |          |
|----------------|-------------------|-------------|-------------|-------------|----------------------|------|-----|-----|--------------------------------------------------------|------------------|----------|
| 1 <sup>2</sup> | randomised trials | not serious | not serious | not serious | serious <sup>b</sup> | none | 127 | 135 | MD <b>111 higher</b><br>(2.01 higher to 219.99 higher) | ⊕⊕⊕○<br>MODERATE | CRITICAL |
|----------------|-------------------|-------------|-------------|-------------|----------------------|------|-----|-----|--------------------------------------------------------|------------------|----------|

### Peak FEV1 response - Children 5 ug

|                |                   |             |             |             |                      |      |     |     |                                                         |                  |          |
|----------------|-------------------|-------------|-------------|-------------|----------------------|------|-----|-----|---------------------------------------------------------|------------------|----------|
| 1 <sup>1</sup> | randomised trials | not serious | not serious | not serious | serious <sup>b</sup> | none | 128 | 130 | MD <b>139 higher</b><br>(74.32 higher to 203.68 higher) | ⊕⊕⊕○<br>MODERATE | CRITICAL |
|----------------|-------------------|-------------|-------------|-------------|----------------------|------|-----|-----|---------------------------------------------------------|------------------|----------|

### Peak FEV1 response - Adolescents 5 ug

|                |                   |             |             |             |                      |      |     |     |                                                       |                  |          |
|----------------|-------------------|-------------|-------------|-------------|----------------------|------|-----|-----|-------------------------------------------------------|------------------|----------|
| 1 <sup>2</sup> | randomised trials | not serious | not serious | not serious | serious <sup>b</sup> | none | 130 | 135 | MD <b>90 higher</b><br>(18.99 lower to 198.99 higher) | ⊕⊕⊕○<br>MODERATE | CRITICAL |
|----------------|-------------------|-------------|-------------|-------------|----------------------|------|-----|-----|-------------------------------------------------------|------------------|----------|

### Peak FEV1 response - Adults 5 ug

| Certainty assessment |                   |              |               |              |                      |                      | № of patients     |         | Effect                                                     |                   | Certainty        | Importance |
|----------------------|-------------------|--------------|---------------|--------------|----------------------|----------------------|-------------------|---------|------------------------------------------------------------|-------------------|------------------|------------|
| № of studies         | Study design      | Risk of bias | Inconsistency | Indirectness | Imprecision          | Other considerations | LAMA (tiotropium) | placebo | Relative (95% CI)                                          | Absolute (95% CI) |                  |            |
| 2 <sup>3,4</sup>     | randomised trials | not serious  | not serious   | not serious  | serious <sup>b</sup> | none                 | 456               | 456     | MD <b>120.74 higher</b><br>(54.12 higher to 187.36 higher) |                   | ⊕⊕⊕○<br>MODERATE | CRITICAL   |

#### Change in ACQ-7 scores - Children 2.5 ug

|                |                   |             |             |             |             |      |     |     |                                                      |  |              |          |
|----------------|-------------------|-------------|-------------|-------------|-------------|------|-----|-----|------------------------------------------------------|--|--------------|----------|
| 1 <sup>1</sup> | randomised trials | not serious | not serious | not serious | not serious | none | 136 | 130 | MD <b>0.02 higher</b><br>(0.14 lower to 0.18 higher) |  | ⊕⊕⊕⊕<br>HIGH | CRITICAL |
|----------------|-------------------|-------------|-------------|-------------|-------------|------|-----|-----|------------------------------------------------------|--|--------------|----------|

#### Change in ACQ-7 scores - Adolescents 2.5 ug

|                |                   |             |             |             |             |      |     |     |                                                     |  |              |          |
|----------------|-------------------|-------------|-------------|-------------|-------------|------|-----|-----|-----------------------------------------------------|--|--------------|----------|
| 1 <sup>2</sup> | randomised trials | not serious | not serious | not serious | not serious | none | 127 | 135 | MD <b>0.06 higher</b><br>(0.1 lower to 0.22 higher) |  | ⊕⊕⊕⊕<br>HIGH | CRITICAL |
|----------------|-------------------|-------------|-------------|-------------|-------------|------|-----|-----|-----------------------------------------------------|--|--------------|----------|

#### Change in ACQ-7 scores - Children 5 ug

|                |                   |             |             |             |             |      |     |     |                                                     |  |              |          |
|----------------|-------------------|-------------|-------------|-------------|-------------|------|-----|-----|-----------------------------------------------------|--|--------------|----------|
| 1 <sup>1</sup> | randomised trials | not serious | not serious | not serious | not serious | none | 126 | 130 | MD <b>0.08 lower</b><br>(0.24 lower to 0.08 higher) |  | ⊕⊕⊕⊕<br>HIGH | CRITICAL |
|----------------|-------------------|-------------|-------------|-------------|-------------|------|-----|-----|-----------------------------------------------------|--|--------------|----------|

#### Change in ACQ-7 scores - Adolescents 5 ug

|                |                   |             |             |             |             |      |     |     |                                                      |  |              |          |
|----------------|-------------------|-------------|-------------|-------------|-------------|------|-----|-----|------------------------------------------------------|--|--------------|----------|
| 1 <sup>2</sup> | randomised trials | not serious | not serious | not serious | not serious | none | 130 | 135 | MD <b>0.04 higher</b><br>(0.12 lower to 0.19 higher) |  | ⊕⊕⊕⊕<br>HIGH | CRITICAL |
|----------------|-------------------|-------------|-------------|-------------|-------------|------|-----|-----|------------------------------------------------------|--|--------------|----------|

#### Change in ACQ-7 scores - Adults 5 ug

|                  |                   |             |             |             |             |      |     |     |                                                    |  |              |          |
|------------------|-------------------|-------------|-------------|-------------|-------------|------|-----|-----|----------------------------------------------------|--|--------------|----------|
| 2 <sup>3,4</sup> | randomised trials | not serious | not serious | not serious | not serious | none | 456 | 456 | MD <b>0.17 lower</b><br>(0.25 lower to 0.09 lower) |  | ⊕⊕⊕⊕<br>HIGH | CRITICAL |
|------------------|-------------------|-------------|-------------|-------------|-------------|------|-----|-----|----------------------------------------------------|--|--------------|----------|

#### Asthma worsening (at least 1) - Children 2.5 ug

| Certainty assessment |                   |              |               |              |                      |                      | № of patients     |               | Effect                           |                                                            | Certainty        | Importance |
|----------------------|-------------------|--------------|---------------|--------------|----------------------|----------------------|-------------------|---------------|----------------------------------|------------------------------------------------------------|------------------|------------|
| № of studies         | Study design      | Risk of bias | Inconsistency | Indirectness | Imprecision          | Other considerations | LAMA (tiotropium) | placebo       | Relative (95% CI)                | Absolute (95% CI)                                          |                  |            |
| 1 <sup>1</sup>       | randomised trials | not serious  | not serious   | not serious  | serious <sup>c</sup> | none                 | 29/135 (21.5%)    | 23/65 (35.4%) | <b>RR 0.61</b><br>(0.38 to 0.96) | <b>138 fewer per 1.000</b><br>(from 219 fewer to 14 fewer) | ⊕⊕⊕○<br>MODERATE | CRITICAL   |

#### Asthma worsening (at least 1) - Adolescents 2.5 ug

|                |                   |             |             |             |                      |      |                |               |                                  |                                                          |                  |          |
|----------------|-------------------|-------------|-------------|-------------|----------------------|------|----------------|---------------|----------------------------------|----------------------------------------------------------|------------------|----------|
| 1 <sup>2</sup> | randomised trials | not serious | not serious | not serious | serious <sup>c</sup> | none | 18/127 (14.2%) | 12/67 (17.9%) | <b>RR 0.79</b><br>(0.41 to 1.54) | <b>38 fewer per 1.000</b><br>(from 106 fewer to 97 more) | ⊕⊕⊕○<br>MODERATE | CRITICAL |
|----------------|-------------------|-------------|-------------|-------------|----------------------|------|----------------|---------------|----------------------------------|----------------------------------------------------------|------------------|----------|

#### Asthma worsening (at least 1) - Children 5 ug

|                |                   |             |             |             |                      |      |                |               |                                  |                                                          |                  |          |
|----------------|-------------------|-------------|-------------|-------------|----------------------|------|----------------|---------------|----------------------------------|----------------------------------------------------------|------------------|----------|
| 1 <sup>1</sup> | randomised trials | not serious | not serious | not serious | serious <sup>c</sup> | none | 35/128 (27.3%) | 23/65 (35.4%) | <b>RR 0.77</b><br>(0.50 to 1.19) | <b>81 fewer per 1.000</b><br>(from 177 fewer to 67 more) | ⊕⊕⊕○<br>MODERATE | CRITICAL |
|----------------|-------------------|-------------|-------------|-------------|----------------------|------|----------------|---------------|----------------------------------|----------------------------------------------------------|------------------|----------|

#### Asthma worsening (at least 1) - Adolescents 5 ug

|                |                   |             |             |             |                      |      |                |               |                                  |                                                          |                  |          |
|----------------|-------------------|-------------|-------------|-------------|----------------------|------|----------------|---------------|----------------------------------|----------------------------------------------------------|------------------|----------|
| 1 <sup>2</sup> | randomised trials | not serious | not serious | not serious | serious <sup>c</sup> | none | 15/130 (11.5%) | 12/67 (17.9%) | <b>RR 0.64</b><br>(0.32 to 1.30) | <b>64 fewer per 1.000</b><br>(from 122 fewer to 54 more) | ⊕⊕⊕○<br>MODERATE | CRITICAL |
|----------------|-------------------|-------------|-------------|-------------|----------------------|------|----------------|---------------|----------------------------------|----------------------------------------------------------|------------------|----------|

#### Asthma worsening (at least 1) - Adults 5 ug

| Certainty assessment |                   |              |               |              |             |                      | No of patients    |                 | Effect                 |                                                  | Certainty | Importance |
|----------------------|-------------------|--------------|---------------|--------------|-------------|----------------------|-------------------|-----------------|------------------------|--------------------------------------------------|-----------|------------|
| No of studies        | Study design      | Risk of bias | Inconsistency | Indirectness | Imprecision | Other considerations | LAMA (tiotropium) | placebo         | Relative (95% CI)      | Absolute (95% CI)                                |           |            |
| 1 <sup>4</sup>       | randomised trials | not serious  | not serious   | not serious  | not serious | none                 | 226/453 (49.9%)   | 287/454 (63.2%) | RR 0.79 (0.70 to 0.89) | 133 fewer per 1.000 (from 190 fewer to 70 fewer) | ⊕⊕⊕⊕ HIGH | CRITICAL   |

**Peak FEV1 % predicted - Children 2.5 ug**

|                |                   |                      |             |             |             |      |     |     |                                          |               |           |
|----------------|-------------------|----------------------|-------------|-------------|-------------|------|-----|-----|------------------------------------------|---------------|-----------|
| 1 <sup>1</sup> | randomised trials | serious <sup>a</sup> | not serious | not serious | not serious | none | 135 | 130 | MD 3.6 higher (0.5 higher to 6.7 higher) | ⊕⊕⊕○ MODERATE | IMPORTANT |
|----------------|-------------------|----------------------|-------------|-------------|-------------|------|-----|-----|------------------------------------------|---------------|-----------|

**Peak FEV1 % predicted - Children 5 ug**

|                |                   |                      |             |             |             |      |     |     |                                          |               |           |
|----------------|-------------------|----------------------|-------------|-------------|-------------|------|-----|-----|------------------------------------------|---------------|-----------|
| 1 <sup>1</sup> | randomised trials | serious <sup>a</sup> | not serious | not serious | not serious | none | 128 | 130 | MD 6.3 higher (3.3 higher to 9.3 higher) | ⊕⊕⊕○ MODERATE | IMPORTANT |
|----------------|-------------------|----------------------|-------------|-------------|-------------|------|-----|-----|------------------------------------------|---------------|-----------|

**Peak FEV1 % predicted - Children 5 ug**

|                |                   |                      |             |             |                           |      |                                                                                                                                                                                                                                                                |  |  |          |           |
|----------------|-------------------|----------------------|-------------|-------------|---------------------------|------|----------------------------------------------------------------------------------------------------------------------------------------------------------------------------------------------------------------------------------------------------------------|--|--|----------|-----------|
| 1 <sup>1</sup> | randomised trials | serious <sup>a</sup> | not serious | not serious | very serious <sup>c</sup> | none | Narrative report + figure: " Post hoc analyses of adjusted mean trough FEV1/FVC responses demonstrated statistically significant improvements at all-time points versus placebo with both tiotropium doses, with the exception of tiotropium 2.5 mg at week 8" |  |  | ⊕⊕○○ LOW | IMPORTANT |
|----------------|-------------------|----------------------|-------------|-------------|---------------------------|------|----------------------------------------------------------------------------------------------------------------------------------------------------------------------------------------------------------------------------------------------------------------|--|--|----------|-----------|

**Peak FEV1 % predicted - Children 5 ug**

|                |                   |                      |             |             |                           |      |                                                                                                                                                                                                                                                                |  |  |          |           |
|----------------|-------------------|----------------------|-------------|-------------|---------------------------|------|----------------------------------------------------------------------------------------------------------------------------------------------------------------------------------------------------------------------------------------------------------------|--|--|----------|-----------|
| 1 <sup>1</sup> | randomised trials | serious <sup>a</sup> | not serious | not serious | very serious <sup>c</sup> | none | Narrative report + figure: " Post hoc analyses of adjusted mean trough FEV1/FVC responses demonstrated statistically significant improvements at all-time points versus placebo with both tiotropium doses, with the exception of tiotropium 2.5 mg at week 8" |  |  | ⊕⊕○○ LOW | IMPORTANT |
|----------------|-------------------|----------------------|-------------|-------------|---------------------------|------|----------------------------------------------------------------------------------------------------------------------------------------------------------------------------------------------------------------------------------------------------------------|--|--|----------|-----------|

| Certainty assessment |              |              |               |              |             |                      | № of patients     |         | Effect            |                   | Certainty | Importance |
|----------------------|--------------|--------------|---------------|--------------|-------------|----------------------|-------------------|---------|-------------------|-------------------|-----------|------------|
| № of studies         | Study design | Risk of bias | Inconsistency | Indirectness | Imprecision | Other considerations | LAMA (tiotropium) | placebo | Relative (95% CI) | Absolute (95% CI) |           |            |

#### AQLQ scores - Adults 5 ug

|                  |                   |             |             |             |             |      |     |     |                                              |              |          |
|------------------|-------------------|-------------|-------------|-------------|-------------|------|-----|-----|----------------------------------------------|--------------|----------|
| 2 <sup>3,4</sup> | randomised trials | not serious | not serious | not serious | not serious | none | 456 | 456 | MD 0.1 higher<br>(0.04 lower to 0.23 higher) | ⊕⊕⊕⊕<br>HIGH | CRITICAL |
|------------------|-------------------|-------------|-------------|-------------|-------------|------|-----|-----|----------------------------------------------|--------------|----------|

#### Time to first exacerbation - Adults 5 ug

|                |                   |             |             |             |                      |      |       |       |                           |                  |          |
|----------------|-------------------|-------------|-------------|-------------|----------------------|------|-------|-------|---------------------------|------------------|----------|
| 1 <sup>4</sup> | randomised trials | not serious | not serious | not serious | serious <sup>d</sup> | none | -/456 | -/456 | HR 0.79<br>(0.62 to 1.01) | ⊕⊕⊕○<br>MODERATE | CRITICAL |
|----------------|-------------------|-------------|-------------|-------------|----------------------|------|-------|-------|---------------------------|------------------|----------|

#### Hospitalizations for asthma - Adults 5 ug

|                |                   |             |             |             |                      |      |               |               |                           |                                                 |                  |           |
|----------------|-------------------|-------------|-------------|-------------|----------------------|------|---------------|---------------|---------------------------|-------------------------------------------------|------------------|-----------|
| 1 <sup>4</sup> | randomised trials | not serious | not serious | not serious | serious <sup>c</sup> | none | 16/453 (3.5%) | 20/454 (4.4%) | RR 0.80<br>(0.42 to 1.53) | 9 fewer per 1.000<br>(from 26 fewer to 23 more) | ⊕⊕⊕○<br>MODERATE | IMPORTANT |
|----------------|-------------------|-------------|-------------|-------------|----------------------|------|---------------|---------------|---------------------------|-------------------------------------------------|------------------|-----------|

#### Any adverse event - Children 2.5 ug

|                |                   |             |             |             |                      |      |                   |               |                           |                                                   |                  |          |
|----------------|-------------------|-------------|-------------|-------------|----------------------|------|-------------------|---------------|---------------------------|---------------------------------------------------|------------------|----------|
| 1 <sup>1</sup> | randomised trials | not serious | not serious | not serious | serious <sup>c</sup> | none | 59/136<br>(43.4%) | 33/67 (49.3%) | RR 0.88<br>(0.65 to 1.20) | 59 fewer per 1.000<br>(from 172 fewer to 99 more) | ⊕⊕⊕○<br>MODERATE | CRITICAL |
|----------------|-------------------|-------------|-------------|-------------|----------------------|------|-------------------|---------------|---------------------------|---------------------------------------------------|------------------|----------|

#### Any adverse event - Adolescents 2.5 ug



| Certainty assessment |                   |              |               |              |                      |                      | № of patients     |               | Effect                           |                                                           | Certainty        | Importance |
|----------------------|-------------------|--------------|---------------|--------------|----------------------|----------------------|-------------------|---------------|----------------------------------|-----------------------------------------------------------|------------------|------------|
| № of studies         | Study design      | Risk of bias | Inconsistency | Indirectness | Imprecision          | Other considerations | LAMA (tiotropium) | placebo       | Relative (95% CI)                | Absolute (95% CI)                                         |                  |            |
| 1 <sup>2</sup>       | randomised trials | not serious  | not serious   | not serious  | serious <sup>c</sup> | none                 | 42/127 (33.1%)    | 24/68 (35.3%) | <b>RR 0.94</b><br>(0.62 to 1.41) | <b>21 fewer per 1.000</b><br>(from 134 fewer to 145 more) | ⊕⊕⊕○<br>MODERATE | CRITICAL   |

**Any adverse event - Children 5 ug**

|                |                   |             |             |             |                      |      |                |               |                                  |                                                          |                  |          |
|----------------|-------------------|-------------|-------------|-------------|----------------------|------|----------------|---------------|----------------------------------|----------------------------------------------------------|------------------|----------|
| 1 <sup>1</sup> | randomised trials | not serious | not serious | not serious | serious <sup>c</sup> | none | 56/130 (43.1%) | 33/67 (49.3%) | <b>RR 0.87</b><br>(0.64 to 1.20) | <b>64 fewer per 1.000</b><br>(from 177 fewer to 99 more) | ⊕⊕⊕○<br>MODERATE | CRITICAL |
|----------------|-------------------|-------------|-------------|-------------|----------------------|------|----------------|---------------|----------------------------------|----------------------------------------------------------|------------------|----------|

**Any adverse event - Adolescents 5 ug**

|                |                   |             |             |             |                      |      |                |               |                                  |                                                           |                  |          |
|----------------|-------------------|-------------|-------------|-------------|----------------------|------|----------------|---------------|----------------------------------|-----------------------------------------------------------|------------------|----------|
| 1 <sup>2</sup> | randomised trials | not serious | not serious | not serious | serious <sup>c</sup> | none | 43/130 (33.1%) | 24/68 (35.3%) | <b>RR 0.94</b><br>(0.63 to 1.40) | <b>21 fewer per 1.000</b><br>(from 131 fewer to 141 more) | ⊕⊕⊕○<br>MODERATE | CRITICAL |
|----------------|-------------------|-------------|-------------|-------------|----------------------|------|----------------|---------------|----------------------------------|-----------------------------------------------------------|------------------|----------|

**Any adverse event - Adults 5 ug**

|                  |                   |             |             |             |             |      |                 |                 |                                  |                                                           |              |          |
|------------------|-------------------|-------------|-------------|-------------|-------------|------|-----------------|-----------------|----------------------------------|-----------------------------------------------------------|--------------|----------|
| 2 <sup>3,4</sup> | randomised trials | not serious | not serious | not serious | not serious | none | 335/456 (73.5%) | 366/456 (80.3%) | <b>RR 0.92</b><br>(0.86 to 0.98) | <b>64 fewer per 1.000</b><br>(from 112 fewer to 16 fewer) | ⊕⊕⊕⊕<br>HIGH | CRITICAL |
|------------------|-------------------|-------------|-------------|-------------|-------------|------|-----------------|-----------------|----------------------------------|-----------------------------------------------------------|--------------|----------|

**Serious adverse events - Children 2.5 ug**

| Certainty assessment |                   |              |               |              |                           |                      | № of patients     |             | Effect                            |                                                         | Certainty   | Importance |
|----------------------|-------------------|--------------|---------------|--------------|---------------------------|----------------------|-------------------|-------------|-----------------------------------|---------------------------------------------------------|-------------|------------|
| № of studies         | Study design      | Risk of bias | Inconsistency | Indirectness | Imprecision               | Other considerations | LAMA (tiotropium) | placebo     | Relative (95% CI)                 | Absolute (95% CI)                                       |             |            |
| 1 <sup>1</sup>       | randomised trials | not serious  | not serious   | not serious  | very serious <sub>c</sub> | none                 | 2/136 (1.5%)      | 1/67 (1.5%) | <b>RR 0.99</b><br>(0.09 to 10.67) | <b>0 fewer per 1.000</b><br>(from 14 fewer to 144 more) | ⊕⊕○○<br>LOW | IMPORTANT  |

**Serious adverse events - Adolescents 2.5 ug**

|                |                   |             |             |             |                           |      |              |             |               |  |             |           |
|----------------|-------------------|-------------|-------------|-------------|---------------------------|------|--------------|-------------|---------------|--|-------------|-----------|
| 1 <sup>2</sup> | randomised trials | not serious | not serious | not serious | very serious <sub>c</sub> | none | 0/127 (0.0%) | 0/68 (0.0%) | not estimable |  | ⊕⊕○○<br>LOW | IMPORTANT |
|----------------|-------------------|-------------|-------------|-------------|---------------------------|------|--------------|-------------|---------------|--|-------------|-----------|

**Serious adverse events - Children 5 ug**

|                |                   |             |             |             |                           |      |              |             |                                   |                                                         |             |           |
|----------------|-------------------|-------------|-------------|-------------|---------------------------|------|--------------|-------------|-----------------------------------|---------------------------------------------------------|-------------|-----------|
| 1 <sup>1</sup> | randomised trials | not serious | not serious | not serious | very serious <sub>c</sub> | none | 4/130 (3.1%) | 1/67 (1.5%) | <b>RR 2.06</b><br>(0.24 to 18.08) | <b>16 more per 1.000</b><br>(from 11 fewer to 255 more) | ⊕⊕○○<br>LOW | IMPORTANT |
|----------------|-------------------|-------------|-------------|-------------|---------------------------|------|--------------|-------------|-----------------------------------|---------------------------------------------------------|-------------|-----------|

**Serious adverse events - Adolescents 5 ug**

|                |                   |             |             |             |                           |      |              |             |                                   |                                                       |             |           |
|----------------|-------------------|-------------|-------------|-------------|---------------------------|------|--------------|-------------|-----------------------------------|-------------------------------------------------------|-------------|-----------|
| 1 <sup>2</sup> | randomised trials | not serious | not serious | not serious | very serious <sub>c</sub> | none | 3/130 (2.3%) | 0/68 (0.0%) | <b>RR 3.69</b><br>(0.19 to 70.36) | <b>0 fewer per 1.000</b><br>(from 0 fewer to 0 fewer) | ⊕⊕○○<br>LOW | IMPORTANT |
|----------------|-------------------|-------------|-------------|-------------|---------------------------|------|--------------|-------------|-----------------------------------|-------------------------------------------------------|-------------|-----------|

**Serious adverse events - Adults 5 ug**

| Certainty assessment |                   |              |               |              |                      |                      | No of patients    |               | Effect                           |                                                        | Certainty        | Importance |
|----------------------|-------------------|--------------|---------------|--------------|----------------------|----------------------|-------------------|---------------|----------------------------------|--------------------------------------------------------|------------------|------------|
| No of studies        | Study design      | Risk of bias | Inconsistency | Indirectness | Imprecision          | Other considerations | LAMA (tiotropium) | placebo       | Relative (95% CI)                | Absolute (95% CI)                                      |                  |            |
| 2 <sup>3,4</sup>     | randomised trials | not serious  | not serious   | not serious  | serious <sup>c</sup> | none                 | 37/456 (8.1%)     | 40/456 (8.8%) | <b>RR 0.93</b><br>(0.61 to 1.43) | <b>6 fewer per 1.000</b><br>(from 34 fewer to 38 more) | ⊕⊕⊕○<br>MODERATE | IMPORTANT  |

**CI:** Confidence interval; **MD:** Mean difference; **SMD:** Standardised mean difference; **RR:** Risk ratio; **HR:** Hazard Ratio

### Explanations

- a. Selective reporting bias: Some outcomes were assessed post-hoc including peak FEV1 (0-3h)
- b. Although we cannot exclude futility because all estimates do not reach MID, upper 95%CI boundary is next to clinically important effect. Minimal important differences for FEV1 change= 230 millilitres
- c. Small number of events, large 95%CI
- d. Large 95CI% which includes no effect or a relevant benefit

### References

1. Szeffler SJ, Murphy K, Harper T 3rd, Boner A, Laki I, Engel M, El Azzi G, Moroni-Zentgraf P, Finnigan H, Hamelmann E.. A phase III randomized controlled trial of tiotropium add-on therapy in children with severe symptomatic asthma. J Allergy Clin Immunol.; 2017.
2. Hamelmann E, Bernstein JA, Vandewalker M, Moroni-Zentgraf P, Verri D, Unseld A, Engel M, Boner AL. A randomised controlled trial of tiotropium in adolescents with severe symptomatic asthma. Eur Respir J; 2017
3. Kerstjens HA, Moroni-Zentgraf P, Tashkin DP, Dahl R, Paggiaro P, Vandewalker M, Schmidt H, Engel M, Bateman ED.. Tiotropium improves lung function, exacerbation rate, and asthma control, independent of baseline characteristics including age, degree of airway obstruction, and allergic statu. Respir Med; 2016.
4. Kerstjens HA, Engel M, Dahl R, Paggiaro P, Beck E, Vandewalker M, Sigmund R, Seibold W, Moroni-Zentgraf P, Bateman ED.. Tiotropium in asthma poorly controlled with standard combination therapy. N Engl J Med; 2012.

Evidence to Decision Framework: LAMA (tiotropium)

| Should tiotropium vs. no tiotropium be used for children, adolescents, and adults with severe asthma uncontrolled despite GINA step 4-5 or NAEPP step 5 therapies? |                                                                                                                                                                                                                                                                                                                                 |                                                                                                                                                                                                                                                                                                                                                                                                                                                                                                                                                                                                                                                                           |
|--------------------------------------------------------------------------------------------------------------------------------------------------------------------|---------------------------------------------------------------------------------------------------------------------------------------------------------------------------------------------------------------------------------------------------------------------------------------------------------------------------------|---------------------------------------------------------------------------------------------------------------------------------------------------------------------------------------------------------------------------------------------------------------------------------------------------------------------------------------------------------------------------------------------------------------------------------------------------------------------------------------------------------------------------------------------------------------------------------------------------------------------------------------------------------------------------|
| POPULATION:                                                                                                                                                        | Patients with severe asthma not controlled or experiencing exacerbations despite treatment with high-dose inhaled glucocorticoids in combination with a long-acting beta2-adrenergic receptor agonist and a third controller such as a leukotriene modifier if the patient is treated with medium-dose inhaled glucocorticoids. | <b>BACKGROUND:</b><br><br>Several randomized clinical trials have demonstrated that the addition of a long-acting muscarinic antagonist as a second long-acting bronchodilator, initially in COPD, but more recently in mild to severe asthma cohorts, results in improvement in lung function and the prevention of exacerbations. Long-acting muscarinic antagonists such as tiotropium are the most frequently used long-acting bronchodilator for COPD and are a cost-effective and safe adjunct therapy for the management of asthma refractory to a combination of therapies which accounts for a substantial proportion of the burden related to asthma morbidity. |
| INTERVENTION:                                                                                                                                                      | Muscarinic antagonist therapy with tiotropium via soft-mist inhaler (5ug or 10ug) once daily. Tiotropium 2.5ug or 5ug once daily was also evaluated in children and adolescents.                                                                                                                                                |                                                                                                                                                                                                                                                                                                                                                                                                                                                                                                                                                                                                                                                                           |
| COMPARISON:                                                                                                                                                        | Placebo                                                                                                                                                                                                                                                                                                                         |                                                                                                                                                                                                                                                                                                                                                                                                                                                                                                                                                                                                                                                                           |
| MAIN OUTCOMES:                                                                                                                                                     | FEV1, PEFr, severe exacerbations, asthma symptoms, ACQ-7, ACQ-6, AQLQ                                                                                                                                                                                                                                                           |                                                                                                                                                                                                                                                                                                                                                                                                                                                                                                                                                                                                                                                                           |

## Assessment

|                       | JUDGEMENT                                                                                                                                                                                                                                                | RESEARCH EVIDENCE                                                                                                                                                                                                                                                                                                                                                                                                                                                                                                                                                                                                                                                                                                                                                       | ADDITIONAL CONSIDERATIONS |
|-----------------------|----------------------------------------------------------------------------------------------------------------------------------------------------------------------------------------------------------------------------------------------------------|-------------------------------------------------------------------------------------------------------------------------------------------------------------------------------------------------------------------------------------------------------------------------------------------------------------------------------------------------------------------------------------------------------------------------------------------------------------------------------------------------------------------------------------------------------------------------------------------------------------------------------------------------------------------------------------------------------------------------------------------------------------------------|---------------------------|
| DESIRABLE EFFECTS     | <b>How substantial are the desirable anticipated effects?</b> <ul style="list-style-type: none"> <li>○ Trivial</li> <li>○ Small</li> <li>○ Moderate</li> <li><input checked="" type="radio"/> Large</li> <li>○ Varies</li> <li>○ Don't know</li> </ul>   | <p>Results from research evidence (studies)</p> <p>There were three randomised placebo-controlled trials in adults greater than 18 years of age, one crossover and two parallel design, and two in either children or adolescents which impacted the dose of tiotropium (adults were randomized to 5 to 10ug while children and adolescents were randomized to 2.5-5ug once daily). All of these trials included individuals with severe asthma uncontrolled on GINA step 4-5 or NAEPP step 5 therapies. Each trial consistently demonstrated substantial and significant improvements in lung function measures and symptom control with the addition of tiotropium and a subgroup of sufficient duration demonstrated beneficial effects on time to exacerbation.</p> |                           |
| UNDESIRABLE EFFECTS   | <b>How substantial are the undesirable anticipated effects?</b> <ul style="list-style-type: none"> <li>○ Large</li> <li>○ Moderate</li> <li>○ Small</li> <li><input checked="" type="radio"/> Trivial</li> <li>○ Varies</li> <li>○ Don't know</li> </ul> | <p>Adverse events were less frequent in the tiotropium arm compared to placebo in these four trials, while severe adverse events were equally infrequent across treatment arms.</p>                                                                                                                                                                                                                                                                                                                                                                                                                                                                                                                                                                                     |                           |
| CERTAINTY OF EVIDENCE | <b>What is the overall certainty of the evidence of effects?</b> <ul style="list-style-type: none"> <li>○ Very low</li> <li>○ Low</li> <li><input checked="" type="radio"/> Moderate</li> <li>○ High</li> <li>○ No included studies</li> </ul>           | <p>The five included studies were randomised, double-blind, placebo-controlled studies. All of the important primary and secondary outcomes were assessed as high quality according to GRADE Overall risk of bias was low and methodological procedures for random sequence generation, allocation concealment, and blinding were robust. However, one 12-week study of children (Szefer 2017 [PMID:28189771]) may be subject to selective reporting bias as outcomes related to FEF-25-75%, peak and trough FEV1 responses at week 12, and time to exacerbation were assessed post-hoc but presented as main findings. Industry bias is also unclear in four of the five included.</p>                                                                                 |                           |
| VALUES                | <b>Is there important uncertainty about or variability in how much people value the main outcomes?</b> <ul style="list-style-type: none"> <li>○ Important uncertainty or variability</li> </ul>                                                          | <p>There is value placed on the measurement of lung function and the management and prevention of asthma exacerbations. Lung function measures derived from spirometry are a fundamental measure of lung health, are highly correlated with asthma severity and exacerbation risk, and one of the central components determining asthma severity and</p>                                                                                                                                                                                                                                                                                                                                                                                                                |                           |

|                    |                                                                                                                                                                                                                                                                                                                                                                                                                                                                                                    |                                                                                                                                                                                                                                                                                                                                                                                                                                                                                                                                                                                                               |                                                                                                                                                                                                                                                                                                                                                                                                              |
|--------------------|----------------------------------------------------------------------------------------------------------------------------------------------------------------------------------------------------------------------------------------------------------------------------------------------------------------------------------------------------------------------------------------------------------------------------------------------------------------------------------------------------|---------------------------------------------------------------------------------------------------------------------------------------------------------------------------------------------------------------------------------------------------------------------------------------------------------------------------------------------------------------------------------------------------------------------------------------------------------------------------------------------------------------------------------------------------------------------------------------------------------------|--------------------------------------------------------------------------------------------------------------------------------------------------------------------------------------------------------------------------------------------------------------------------------------------------------------------------------------------------------------------------------------------------------------|
|                    | <input checked="" type="radio"/> Possibly important uncertainty or variability<br><input type="radio"/> Probably no important uncertainty or variability<br><input type="radio"/> No important uncertainty or variability<br><input type="radio"/> No known undesirable outcomes                                                                                                                                                                                                                   | <p>NAEPP guideline-based maintenance treatment (Denlinger Am J Respir Crit Care Med. 2017;195(3):302-13. PMID:27556234). Asthma exacerbations account for much of the cost related to asthma (Weiss J Allergy Clin Immunol 2001 PMID:11149982). Exacerbations defined by the need for an intervention such as treatment with systemic glucocorticoids, an emergency room visit, or hospitalization is validated as one the central components for determining asthma severity and GINA/NAEPP guideline-based maintenance therapy (Fuhlbrigge J Allergy Clin Immunol 2012 PMID: <a href="#">22386508</a>).</p> |                                                                                                                                                                                                                                                                                                                                                                                                              |
| BALANCE OF EFFECTS | <p><b>Does the balance between desirable and undesirable effects favor the intervention or the comparison?</b></p> <input type="radio"/> Favors the comparison<br><input type="radio"/> Probably favors the comparison<br><input type="radio"/> Does not favor either the intervention or the comparison<br><input type="radio"/> Probably favors the intervention<br><input checked="" type="radio"/> Favors the intervention<br><input type="radio"/> Varies<br><input type="radio"/> Don't know | <p>Long-acting muscarinic antagonist treatment was associated with substantial and significant improvements in peak lung function, symptom control, and a lower frequency of asthma worsening. There was a lower frequency of adverse events associated with tiotropium treatment while the frequency of severe adverse events was also low and nearly equal to placebo.</p>                                                                                                                                                                                                                                  |                                                                                                                                                                                                                                                                                                                                                                                                              |
| COST EFFECTIVENESS | <p><b>Does the cost-effectiveness of the intervention favor the intervention or the comparison?</b></p> <input type="radio"/> Favors the comparison<br><input type="radio"/> Probably favors the comparison<br><input type="radio"/> Does not favor either the intervention or the comparison<br><input type="radio"/> Probably favors the intervention<br><input type="radio"/> Favors the intervention<br><input type="radio"/> Varies<br><input checked="" type="radio"/> No included studies   | <p>No cost-effectiveness analyses were identified.</p>                                                                                                                                                                                                                                                                                                                                                                                                                                                                                                                                                        | <p>Long-acting muscarinic antagonist therapy was associated with beneficial effects on asthma control, severe exacerbations, and lung function in those severe asthma treated with GINA step 4-5 or NAEPP step 5 therapies. Whether these costs savings outweigh the cost of medication is unclear, but the addition of this inhaled therapy can be done at a lower cost compared to biologic therapies.</p> |

|                                             |                                                                                                                                                                                                                                                                           |                                                                                                                                                                                                                                                                                                                                                                                                                                                                                                                                                                                                                                                                                                                                                                                                                                                                  |  |
|---------------------------------------------|---------------------------------------------------------------------------------------------------------------------------------------------------------------------------------------------------------------------------------------------------------------------------|------------------------------------------------------------------------------------------------------------------------------------------------------------------------------------------------------------------------------------------------------------------------------------------------------------------------------------------------------------------------------------------------------------------------------------------------------------------------------------------------------------------------------------------------------------------------------------------------------------------------------------------------------------------------------------------------------------------------------------------------------------------------------------------------------------------------------------------------------------------|--|
| CERTAINTY OF EVIDENCE OF REQUIRED RESOURCES | <p><b>What is the certainty of the evidence of resource requirements (costs)?</b></p> <ul style="list-style-type: none"> <li>○ Very low</li> <li>○ Low</li> <li>○ Moderate</li> <li>○ High</li> <li>● No included studies</li> </ul>                                      | No included studies.                                                                                                                                                                                                                                                                                                                                                                                                                                                                                                                                                                                                                                                                                                                                                                                                                                             |  |
| EQUITY                                      | <p><b>What would be the impact on health equity?</b></p> <ul style="list-style-type: none"> <li>○ Reduced</li> <li>○ Probably reduced</li> <li>○ Probably no impact</li> <li>○ Probably increased</li> <li>○ Increased</li> <li>○ Varies</li> <li>X Don't know</li> </ul> | <p>Kerstjens and colleagues evaluated subgroups based on age, sex, ethnic and racial groups, and BMI/obesity and found equally beneficial effects on peak FEV1 improvement across sexes and individuals ages 18 or higher and less than 18 years (Kerstjens Respir Med 2016 [PMID:27492532]). This analysis was unable to determine whether there were equally beneficial effects racial groups such as African Americans (N=41), or Asians (N=93) who were the minority of subjects compared to Whites (N=714). In addition, effects were unable to be determined for Hispanic ethnicity (N=25) compared to non-Hispanics (N=826). An anticipated impact could relate to the access and lower cost of tiotropium when compared to biologic drugs which could impact health equity as it relates to socioeconomic status and the treatment of severe asthma.</p> |  |
| ACCEPTABILITY                               | <p><b>Is the intervention acceptable to key stakeholders?</b></p> <ul style="list-style-type: none"> <li>○ No</li> <li>○ Probably no</li> <li>X Probably yes</li> <li>○ Yes</li> <li>○ Varies</li> <li>○ Don't know</li> </ul>                                            | <p>Long-acting muscarinic antagonist therapy improves FEV1 and prevents asthma worsening and exacerbations which may be important in this important subgroup of asthma who experience a substantial proportion of the burden related to asthma morbidity. An introduction of this feasible and cost-effective add-on therapy which effectively impacts these important outcomes is assumed to be highly acceptable to patients and healthcare providers.</p>                                                                                                                                                                                                                                                                                                                                                                                                     |  |
| FEASIBILITY                                 | <p><b>Is the intervention feasible to implement?</b></p> <ul style="list-style-type: none"> <li>○ No</li> <li>○ Probably no</li> <li>X Probably yes</li> <li>○ Yes</li> <li>○ Varies</li> <li>○ Don't know</li> </ul>                                                     | <p>An inhaled therapy delivered once daily is a feasible intervention to implement in terms of convenience and ease of use. Feasibility could be limited by cost in individuals who are already treated with multiple inhaled therapies. Access to providers with sufficient expertise to add-on therapy above GINA step 4-5 or NAEPP step 5 therapies in these subgroups. In these settings, implementation of a once-daily inhaled device which could be used at home is substantially more feasible compared to more costly biologic therapies which are regularly administered in a clinic setting.</p>                                                                                                                                                                                                                                                      |  |





## Should a macrolide (i.e., azithromycin, clarithromycin) be used in adults and children with severe asthma?

### Evidene Profile: MACROLIDES

| Certainty assessment                                                                                               |                   |              |                      |              |                             |                      | № of patients  |                 | Effect                            |                                                                           | Certainty    | Importance |
|--------------------------------------------------------------------------------------------------------------------|-------------------|--------------|----------------------|--------------|-----------------------------|----------------------|----------------|-----------------|-----------------------------------|---------------------------------------------------------------------------|--------------|------------|
| № of studies                                                                                                       | Study design      | Risk of bias | Inconsistency        | Indirectness | Imprecision                 | Other considerations | Macrolide      | Placebo         | Relative (95% CI)                 | Absolute (95% CI)                                                         |              |            |
| Number of exacerbations requiring hospitalisation (follow up: mean 26 weeks)                                       |                   |              |                      |              |                             |                      |                |                 |                                   |                                                                           |              |            |
| 1 <sup>1</sup>                                                                                                     | randomised trials | not serious  | not serious          | not serious  | very serious <sup>a,b</sup> | none                 | 2/55 (3.6%)    | 2/54 (3.7%)     | RR 0.98<br>(0.14 to 6.72)         | 1 fewer per 1,000<br>(from 32 fewer to 212 more)                          | ⊕⊕○○<br>LOW  | CRITICAL   |
| Number of 'severe' exacerbations - requiring at least oral corticosteroids (follow up: range 24 weeks to 48 weeks) |                   |              |                      |              |                             |                      |                |                 |                                   |                                                                           |              |            |
| 3 <sup>1-3</sup>                                                                                                   | randomised trials | not serious  | serious <sup>c</sup> | not serious  | serious <sup>a</sup>        | none                 | 72/285 (25.3%) | 97/280 (34.6%)  | RR 0.77<br>(0.44 to 1.34)         | 80 fewer per 1,000<br>(from 118 more to 194 fewer)                        | ⊕⊕○○<br>LOW  | CRITICAL   |
| Incidence rate (moderate and severe combined) asthma exacerbations (follow up: mean 48 weeks)                      |                   |              |                      |              |                             |                      |                |                 |                                   |                                                                           |              |            |
| 1 <sup>2</sup>                                                                                                     | randomised trials | not serious  | not serious          | not serious  |                             | none                 | 213            | 207             | Rate ratio 0.59<br>(0.47 to 0.74) | Incidence rate (events/patient/year):<br>macrolides 1.07;<br>placebo 1.86 | -            | CRITICAL   |
| Number of patients with at least one moderate or severe asthma exacerbation (follow up: mean 48 weeks)             |                   |              |                      |              |                             |                      |                |                 |                                   |                                                                           |              |            |
| 1 <sup>2</sup>                                                                                                     | randomised trials | not serious  | not serious          | not serious  | not serious                 | none                 | 94/213 (44.1%) | 127/207 (61.4%) | RR 0.72<br>(0.60 to 0.87)         | 172 fewer per 1,000<br>(from 80 fewer to 245 fewer)                       | ⊕⊕⊕⊕<br>HIGH | CRITICAL   |
| Time to asthma exacerbation (moderate or severe) (follow up: mean 48 weeks)                                        |                   |              |                      |              |                             |                      |                |                 |                                   |                                                                           |              |            |

| Certainty assessment                                                                                                                                                                                                                                     |                   |              |               |              |                             |                      | № of patients  |                | Effect                    |                                                     | Certainty    | Importance |
|----------------------------------------------------------------------------------------------------------------------------------------------------------------------------------------------------------------------------------------------------------|-------------------|--------------|---------------|--------------|-----------------------------|----------------------|----------------|----------------|---------------------------|-----------------------------------------------------|--------------|------------|
| № of studies                                                                                                                                                                                                                                             | Study design      | Risk of bias | Inconsistency | Indirectness | Imprecision                 | Other considerations | Macrolide      | Placebo        | Relative (95% CI)         | Absolute (95% CI)                                   |              |            |
| 1 <sup>2</sup>                                                                                                                                                                                                                                           | randomised trials | not serious  | not serious   | not serious  | not serious                 | none                 | 94             | 127            | HR 0.65<br>(0.50 to 0.85) | -                                                   | ⊕⊕⊕⊕<br>HIGH | CRITICAL   |
| Note: HR is 0.65 (95%CI up to 0.85) and the median difference (point estimate) almost 200 days which suggests that the HR reduction is substantial.                                                                                                      |                   |              |               |              |                             |                      |                |                |                           |                                                     |              |            |
| Number of lower respiratory tract infections requiring antibiotics (follow up: range 26 weeks to 48 weeks)                                                                                                                                               |                   |              |               |              |                             |                      |                |                |                           |                                                     |              |            |
| 2 <sup>1,2</sup>                                                                                                                                                                                                                                         | randomised trials | not serious  | not serious   | not serious  | not serious                 | none                 | 56/268 (20.9%) | 93/261 (35.6%) | RR 0.60<br>(0.45 to 0.79) | 143 fewer per 1,000<br>(from 75 fewer to 196 fewer) | ⊕⊕⊕⊕<br>HIGH |            |
| Note: Although exacerbations were designated to be of critical importance by the panel, it is not known how lower respiratory tract infections were considered therefore importance is left blank awaiting outcome of further discussion with the panel. |                   |              |               |              |                             |                      |                |                |                           |                                                     |              |            |
| Change in Asthma Control Questionnaire (ACQ) score from baseline (follow up: range 16 weeks to 48 weeks; Scale from: 0 to 7; MID 0.5)                                                                                                                    |                   |              |               |              |                             |                      |                |                |                           |                                                     |              |            |
| 3 <sup>1,4,5</sup>                                                                                                                                                                                                                                       | randomised trials | not serious  | not serious   | not serious  | not serious                 | none                 | 140            | 136            | -                         | MD 0.11 lower<br>(0.34 lower to 0.12 higher)        | ⊕⊕⊕⊕<br>HIGH | CRITICAL   |
| Post treatment ACQ score (follow up: range 8 weeks to 48 weeks; Scale from: 0 to 7; MID 0.5)                                                                                                                                                             |                   |              |               |              |                             |                      |                |                |                           |                                                     |              |            |
| 2 <sup>2,6</sup>                                                                                                                                                                                                                                         | randomised trials | not serious  | not serious   | not serious  | not serious                 | none                 | 236            | 229            | -                         | MD 0.07 lower<br>(0.24 lower to 0.11 higher)        | ⊕⊕⊕⊕<br>HIGH | CRITICAL   |
| Change in symptom score from baseline (follow up: mean 48 weeks; Scale from: 0 to 4)                                                                                                                                                                     |                   |              |               |              |                             |                      |                |                |                           |                                                     |              |            |
| 1 <sup>4</sup>                                                                                                                                                                                                                                           | randomised trials | not serious  | not serious   | not serious  | very serious <sup>a,b</sup> | none                 | 38             | 37             | -                         | MD 0.17 higher<br>(0.28 lower to 0.63 higher)       | ⊕⊕○○<br>LOW  | CRITICAL   |
| Post treatment total symptom score (follow up: mean 8 weeks; Scale from: 0 to 14)                                                                                                                                                                        |                   |              |               |              |                             |                      |                |                |                           |                                                     |              |            |

| Certainty assessment                                                                                                              |                   |              |               |              |                             |                      | No of patients |               | Effect                           |                                                     | Certainty        | Importance |
|-----------------------------------------------------------------------------------------------------------------------------------|-------------------|--------------|---------------|--------------|-----------------------------|----------------------|----------------|---------------|----------------------------------|-----------------------------------------------------|------------------|------------|
| No of studies                                                                                                                     | Study design      | Risk of bias | Inconsistency | Indirectness | Imprecision                 | Other considerations | Macrolide      | Placebo       | Relative (95% CI)                | Absolute (95% CI)                                   |                  |            |
| 1 <sup>6</sup>                                                                                                                    | randomised trials | not serious  | not serious   | not serious  | very serious <sup>a,b</sup> | none                 | 23             | 22            | -                                | MD <b>0.3 lower</b><br>(2.08 lower to 1.48 higher)  | ⊕⊕○○<br>LOW      | CRITICAL   |
| Mean end of treatment breathlessness score (Visual Analogue Score) (follow up: mean 48 weeks; Scale from: 0 to 10 cm; MID 1.9 cm) |                   |              |               |              |                             |                      |                |               |                                  |                                                     |                  |            |
| 1 <sup>2</sup>                                                                                                                    | randomised trials | not serious  | not serious   | not serious  | serious <sup>a</sup>        | none                 | 212            | 207           | -                                | MD <b>0.49 lower</b><br>(1.18 lower to 0.2 higher)  | ⊕⊕⊕○<br>MODERATE | CRITICAL   |
| Mean end of treatment wheeze score (Visual Analogue Score) (follow up: mean 48 weeks; Scale from: 0 to 10 cm)                     |                   |              |               |              |                             |                      |                |               |                                  |                                                     |                  |            |
| 1 <sup>2</sup>                                                                                                                    | randomised trials | not serious  | not serious   | not serious  | serious <sup>a</sup>        | none                 | 212            | 207           | -                                | MD <b>0.11 lower</b><br>(1.15 lower to 0.94 higher) | ⊕⊕⊕○<br>MODERATE | CRITICAL   |
| Mean end of treatment sputum production score (Visual Analogue Score) (follow up: mean 48 weeks; Scale from: 0 to 10 cm)          |                   |              |               |              |                             |                      |                |               |                                  |                                                     |                  |            |
| 1 <sup>2</sup>                                                                                                                    | randomised trials | not serious  | not serious   | not serious  | serious <sup>f</sup>        | none                 | 212            | 207           | -                                | MD <b>0.62 lower</b><br>(1.23 lower to 0.002 lower) | ⊕⊕⊕○<br>MODERATE | CRITICAL   |
| Mean end of treatment cough score (Visual Analogue Score) (follow up: mean 48 weeks; Scale from: 0 to 10 cm, MID 1.7 cm)          |                   |              |               |              |                             |                      |                |               |                                  |                                                     |                  |            |
| 1 <sup>2</sup>                                                                                                                    | randomised trials | not serious  | not serious   | not serious  | serious <sup>e</sup>        | none                 | 212            | 207           | -                                | MD <b>0.73 lower</b><br>(1.42 lower to 0.04 lower)  | ⊕⊕⊕○<br>MODERATE | CRITICAL   |
| Number of patients with at least 1 adverse effect (follow up: mean 26 weeks)                                                      |                   |              |               |              |                             |                      |                |               |                                  |                                                     |                  |            |
| 1 <sup>1</sup>                                                                                                                    | randomised trials | not serious  | not serious   | not serious  | very serious <sup>a,b</sup> | none                 | 37/55 (67.3%)  | 39/54 (72.2%) | RR <b>0.93</b><br>(0.73 to 1.19) | 51 fewer per 1,000<br>(from 137 more to 195 fewer)  | ⊕⊕○○<br>LOW      | CRITICAL   |

| Certainty assessment                                                                                                                                                                                     |                   |              |               |              |                             |                      | № of patients |                | Effect                    |                                                  | Certainty        | Importance |
|----------------------------------------------------------------------------------------------------------------------------------------------------------------------------------------------------------|-------------------|--------------|---------------|--------------|-----------------------------|----------------------|---------------|----------------|---------------------------|--------------------------------------------------|------------------|------------|
| № of studies                                                                                                                                                                                             | Study design      | Risk of bias | Inconsistency | Indirectness | Imprecision                 | Other considerations | Macrolide     | Placebo        | Relative (95% CI)         | Absolute (95% CI)                                |                  |            |
| Number of serious adverse events (including mortality) (follow up: range 16 weeks to 48 weeks)                                                                                                           |                   |              |               |              |                             |                      |               |                |                           |                                                  |                  |            |
| 4 <sup>1,2,4,5</sup>                                                                                                                                                                                     | randomised trials | not serious  | not serious   | not serious  | very serious <sup>a,b</sup> | none                 | 32/353 (9.1%) | 39/343 (11.4%) | RR 0.81<br>(0.52 to 1.24) | 22 fewer per 1,000<br>(from 27 more to 55 fewer) | ⊕⊕○○<br>LOW      | CRITICAL   |
| Number of withdrawals due to adverse events (follow up: range 16 weeks to 48 weeks)                                                                                                                      |                   |              |               |              |                             |                      |               |                |                           |                                                  |                  |            |
| 4 <sup>1-4</sup>                                                                                                                                                                                         | randomised trials | not serious  | not serious   | not serious  | very serious <sup>a,b</sup> | none                 | 17/323 (5.3%) | 13/317 (4.1%)  | RR 1.28<br>(0.64 to 2.59) | 11 more per 1,000<br>(from 15 fewer to 65 more)  | ⊕⊕○○<br>LOW      | CRITICAL   |
| Note: Note that although serious adverse events were lower in the treatment group, there were more withdrawals due to adverse events, suggesting these results should be considered with low confidence. |                   |              |               |              |                             |                      |               |                |                           |                                                  |                  |            |
| Change in Asthma Quality of Life Questionnaire (AQLQ) from baseline (follow up: range 16 weeks to 48 weeks; Scale from: 1 to 7, MID 0.5)                                                                 |                   |              |               |              |                             |                      |               |                |                           |                                                  |                  |            |
| 3 <sup>1,4,5</sup>                                                                                                                                                                                       | randomised trials | not serious  | not serious   | not serious  | not serious                 | none                 | 140           | 136            | -                         | MD 0.16 higher<br>(0.06 lower to 0.37 higher)    | ⊕⊕⊕⊕<br>HIGH     | IMPORTANT  |
| Mean end of treatment AQLQ score (follow up: mean 48 weeks; Scale from: 1 to 7, MID 0.5)                                                                                                                 |                   |              |               |              |                             |                      |               |                |                           |                                                  |                  |            |
| 1 <sup>2</sup>                                                                                                                                                                                           | randomised trials | not serious  | not serious   | not serious  | serious <sup>e</sup>        | none                 | 209           | 204            | -                         | MD 0.36 higher<br>(0.21 higher to 0.52 higher)   | ⊕⊕⊕○<br>MODERATE | IMPORTANT  |
| Mean end of treatment nasal symptom score (Visual Analogue Score) (follow up: mean 48 weeks; Scale from: 0 to 10 cm; MID 2.3 cm)                                                                         |                   |              |               |              |                             |                      |               |                |                           |                                                  |                  |            |
| 1 <sup>2</sup>                                                                                                                                                                                           | randomised trials | not serious  | not serious   | not serious  | serious <sup>e</sup>        | none                 | 212           | 207            | -                         | MD 0.51 lower<br>(1.04 lower to 0.02 higher)     | ⊕⊕⊕○<br>MODERATE | IMPORTANT  |
| Change in post-bronchodilator FEV1 (% predicted) from baseline (follow up: mean 26 weeks; MID 10.38 %)                                                                                                   |                   |              |               |              |                             |                      |               |                |                           |                                                  |                  |            |

| Certainty assessment                                                                                               |                   |              |               |              |                              |                      | № of patients |         | Effect            |                                                      | Certainty        | Importance |
|--------------------------------------------------------------------------------------------------------------------|-------------------|--------------|---------------|--------------|------------------------------|----------------------|---------------|---------|-------------------|------------------------------------------------------|------------------|------------|
| № of studies                                                                                                       | Study design      | Risk of bias | Inconsistency | Indirectness | Imprecision                  | Other considerations | Macrolide     | Placebo | Relative (95% CI) | Absolute (95% CI)                                    |                  |            |
| 1 <sup>1</sup>                                                                                                     | randomised trials | not serious  | not serious   | not serious  | serious <sup>b</sup>         | none                 | 55            | 54      | -                 | MD <b>1.95 higher</b><br>(2.42 lower to 6.32 higher) | ⊕⊕⊕○<br>MODERATE | IMPORTANT  |
| Change in pre-bronchodilator FEV1 (% predicted) from baseline (follow up: range 16 weeks to 26 weeks; MID 10.38 %) |                   |              |               |              |                              |                      |               |         |                   |                                                      |                  |            |
| 2 <sup>1,5</sup>                                                                                                   | randomised trials | not serious  | not serious   | not serious  | serious <sup>b</sup>         | none                 | 102           | 99      | -                 | MD <b>0.37 higher</b><br>(2.17 lower to 2.91 higher) | ⊕⊕⊕○<br>MODERATE | IMPORTANT  |
| Change in pre-bronchodilator FEV1 (L) (follow up: mean 16 weeks; MID 0.23 L)                                       |                   |              |               |              |                              |                      |               |         |                   |                                                      |                  |            |
| 1 <sup>5</sup>                                                                                                     | randomised trials | not serious  | not serious   | not serious  | serious <sup>b</sup>         | none                 | 47            | 45      | -                 | MD <b>0</b><br>(0.2 lower to 0.2 higher)             | ⊕⊕⊕○<br>MODERATE | IMPORTANT  |
| Mean end of treatment pre-bronchodilator FEV1 (% predicted) (follow up: mean 8 weeks; MID 10.38 %)                 |                   |              |               |              |                              |                      |               |         |                   |                                                      |                  |            |
| 1 <sup>6</sup>                                                                                                     | randomised trials | not serious  | not serious   | not serious  | very serious <sup>a, b</sup> | none                 | 23            | 22      | -                 | MD <b>5.6 higher</b><br>(5.62 lower to 16.82 higher) | ⊕⊕○○<br>LOW      | IMPORTANT  |
| Mean end of treatment pre-bronchodilator FEV1 (L) (follow up: mean 48 weeks; MID 0.23 L)                           |                   |              |               |              |                              |                      |               |         |                   |                                                      |                  |            |
| 1 <sup>2</sup>                                                                                                     | randomised trials | not serious  | not serious   | not serious  | serious <sup>e</sup>         | none                 | 210           | 205     | -                 | MD <b>0.12 lower</b><br>(0.27 lower to 0.03 higher)  | ⊕⊕⊕○<br>MODERATE | IMPORTANT  |

**CI:** Confidence interval; **RR:** Risk ratio; **HR:** Hazard Ratio; **MD:** Mean difference

### Explanations

a. The ends of the 95% CI include both appreciable benefit and appreciable harm and would lead to opposite clinical decisions.

- b. Limited number of patients or events, does not meet OIS
- c. There is variation in point estimates for included studies with an I2 of 70% which may indicate moderate inconsistency
- d. One study reports 'number of patients with at least one primary endpoint' which is a composite of severe asthma exacerbations and lower respiratory tract infections requiring antibiotics. This study contributes 42% of events. Inclusion of lower respiratory tract infections means this data cannot be considered completely representative of exacerbations alone.
- e. The lower end of the 95% CI crosses the minimally important difference (MID) for this outcome.
- f. MID not established for this measure however lower end of confidence interval (score 0.002 lower) unlikely to be clinically meaningful.

#### **Bibliography:**

1. Brusselle GG, Vanderstichele C, Jordens P, et al. Azithromycin for prevention of exacerbations in severe asthma (AZISAST): a multicentre randomised double-blind placebo-controlled trial. *Thorax* 2013; **68**(4): 322-9.
2. Gibson PG, Yang IA, Upham JW, et al. Effect of azithromycin on asthma exacerbations and quality of life in adults with persistent uncontrolled asthma (AMAZES): a randomised, double-blind, placebo-controlled trial. *Lancet* 2017; **390**(10095): 659-68.
3. Strunk RC, Bacharier LB, Phillips BR, et al. Azithromycin or montelukast as inhaled corticosteroid-sparing agents in moderate-to-severe childhood asthma study. *J Allergy Clin Immunol* 2008; **122**(6): 1138-44 e4.
4. Hahn DL, Grasmick M, Hetzel S, Yale S. Azithromycin for bronchial asthma in adults: an effectiveness trial. *J Am Board Fam Med* 2012; **25**(4): 442-59.
5. Sutherland ER, King TS, Icitovic N, et al. A trial of clarithromycin for the treatment of suboptimally controlled asthma. *J Allergy Clin Immunol* 2010; **126**(4): 747-53.
6. Simpson JL, Powell H, Boyle MJ, Scott RJ, Gibson PG. Clarithromycin targets neutrophilic airway inflammation in refractory asthma. *Am J Respir Crit Care Med* 2008; **177**(2): 148-55.

| Should a macrolide (i.e., azithromycin, clarithromycin) be used in adults and children with severe asthma? |                                                             |                                                                                                                                                                                                                                                                                                                                                                                                                                                                                                                                                                                                                                                                                                                                                                                 |
|------------------------------------------------------------------------------------------------------------|-------------------------------------------------------------|---------------------------------------------------------------------------------------------------------------------------------------------------------------------------------------------------------------------------------------------------------------------------------------------------------------------------------------------------------------------------------------------------------------------------------------------------------------------------------------------------------------------------------------------------------------------------------------------------------------------------------------------------------------------------------------------------------------------------------------------------------------------------------|
| POPULATION:                                                                                                | Adults and children with severe asthma                      | <b>BACKGROUND:</b><br><br>By definition, patients with severe asthma have disease that is either unresponsive to traditional therapies with inhaled corticosteroids and bronchodilators or require these therapies to maintain adequate control. To address this unmet need for improved therapies, in particular in patients not responding to step 5 biologicals or having no access to those treatments, and in view of the possible immunomodulatory effect of macrolides, these medications are being used long-term for the management of the disease. This systematic review and meta-analysis synthesizes the data from randomized controlled trials and meta-analyses investigating the use of macrolides and provides treatment recommendations based on the results. |
| INTERVENTION:                                                                                              | Macrolide                                                   |                                                                                                                                                                                                                                                                                                                                                                                                                                                                                                                                                                                                                                                                                                                                                                                 |
| COMPARISON:                                                                                                | No macrolide                                                |                                                                                                                                                                                                                                                                                                                                                                                                                                                                                                                                                                                                                                                                                                                                                                                 |
| MAIN OUTCOMES:                                                                                             | Rate of exacerbations                                       |                                                                                                                                                                                                                                                                                                                                                                                                                                                                                                                                                                                                                                                                                                                                                                                 |
|                                                                                                            | Time to first asthma exacerbation                           |                                                                                                                                                                                                                                                                                                                                                                                                                                                                                                                                                                                                                                                                                                                                                                                 |
|                                                                                                            | Asthma exacerbations requiring ER visits or hospitalization |                                                                                                                                                                                                                                                                                                                                                                                                                                                                                                                                                                                                                                                                                                                                                                                 |
|                                                                                                            | Lung function                                               |                                                                                                                                                                                                                                                                                                                                                                                                                                                                                                                                                                                                                                                                                                                                                                                 |
|                                                                                                            | Asthma control                                              |                                                                                                                                                                                                                                                                                                                                                                                                                                                                                                                                                                                                                                                                                                                                                                                 |
|                                                                                                            | Maintenance corticosteroid dose reduction                   |                                                                                                                                                                                                                                                                                                                                                                                                                                                                                                                                                                                                                                                                                                                                                                                 |
|                                                                                                            | Adverse events                                              |                                                                                                                                                                                                                                                                                                                                                                                                                                                                                                                                                                                                                                                                                                                                                                                 |
|                                                                                                            | Serious adverse events                                      |                                                                                                                                                                                                                                                                                                                                                                                                                                                                                                                                                                                                                                                                                                                                                                                 |
|                                                                                                            | Quality of life                                             |                                                                                                                                                                                                                                                                                                                                                                                                                                                                                                                                                                                                                                                                                                                                                                                 |

## Assessment

|                   | JUDGEMENT                                                                                                                                                                                                                      | RESEARCH EVIDENCE                                                                                                                                                                                                                                                                                                                                                                                                                                                                                                                                                                                                                                                                                                                                                                                                                                                                                                                                                                                                                                                                                                                                                                                                                                                                                                                                                                                                                                                                                                                                                                                                                                                                                                                                                                                                                                                                                                                                                                                                                                                                                                                                                                                                                                                                                                                                                                              | ADDITIONAL CONSIDERATIONS                                                                                                                                                                                                                                                                                                                                                                                                                                                                                                                                                                                                                                                                                                                                                                                                                                                                     |
|-------------------|--------------------------------------------------------------------------------------------------------------------------------------------------------------------------------------------------------------------------------|------------------------------------------------------------------------------------------------------------------------------------------------------------------------------------------------------------------------------------------------------------------------------------------------------------------------------------------------------------------------------------------------------------------------------------------------------------------------------------------------------------------------------------------------------------------------------------------------------------------------------------------------------------------------------------------------------------------------------------------------------------------------------------------------------------------------------------------------------------------------------------------------------------------------------------------------------------------------------------------------------------------------------------------------------------------------------------------------------------------------------------------------------------------------------------------------------------------------------------------------------------------------------------------------------------------------------------------------------------------------------------------------------------------------------------------------------------------------------------------------------------------------------------------------------------------------------------------------------------------------------------------------------------------------------------------------------------------------------------------------------------------------------------------------------------------------------------------------------------------------------------------------------------------------------------------------------------------------------------------------------------------------------------------------------------------------------------------------------------------------------------------------------------------------------------------------------------------------------------------------------------------------------------------------------------------------------------------------------------------------------------------------|-----------------------------------------------------------------------------------------------------------------------------------------------------------------------------------------------------------------------------------------------------------------------------------------------------------------------------------------------------------------------------------------------------------------------------------------------------------------------------------------------------------------------------------------------------------------------------------------------------------------------------------------------------------------------------------------------------------------------------------------------------------------------------------------------------------------------------------------------------------------------------------------------|
| DESIRABLE EFFECTS | <p><b>How substantial are the desirable anticipated effects?</b></p> <ul style="list-style-type: none"> <li>○ Trivial</li> <li>● Small</li> <li>○ Moderate</li> <li>○ Large</li> <li>○ Varies</li> <li>○ Don't know</li> </ul> | <p>We identified a total of 6 clinical trials assessing the effectiveness of macrolide treatment to placebo. Four assessed azithromycin (Bruselle 2013, Gibson 2017, Strunk 2008, Hahn 2012) and two assessed clarithromycin (Sutherland 2010, Simpson 2008).</p> <p>In the largest study to date (Gibson), azithromycin 500mg (three times/week during 48 weeks) reduced asthma moderate to severe exacerbations (1.07 per patient-year [95% CI 0.85-1.29]) compared with placebo (1.86 per patient-year [1.54-2.18]; incidence rate ratio [IRR] 0.59 [95% CI 0.47-0.74]) and time to moderate to severe exacerbation; hazard ratio [HR] 0.65 [95% CI 0.50-0.85]. The proportion of patients experiencing at least one asthma exacerbation was reduced by azithromycin treatment (127 [61%] patients in the placebo group vs 94 [44%] patients in the azithromycin group; rate ratio [RR] 0.72 [95% CI 0.60-0.87]). Azithromycin significantly improved asthma-related quality of life questionnaire (AQLQ) at the end of treatment (adjusted mean difference, 0.36 [95% CI 0.21-0.52]).</p> <p>Macrolides were not associated to a reduction of severe exacerbations (Bruselle 2013, Gibson 2017, Strunk 2008), improvements in asthma control questionnaire (ACQ) (Bruselle 2013, Gibson 2017, Strunk 2008, Hahn 2012, Sutherland 2010, Simpson 2008) or lung function (FEV1) (Bruselle 2013, Gibson 2017, Sutherland 2010, Simpson 2008).</p> <p>In the AZISAST trial, in a predefined subgroup with non-eosinophilic severe asthma (blood eosinophilia <math>\leq 200/\mu\text{l}</math>), azithromycin was associated with a significantly lower combined primary endpoint rate* (PEP) than placebo in subjects: 0.44 PEPs (95% CI 0.25 to 0.78) versus 1.03 PEPs (95% CI 0.72 to 1.48) (<math>p=0.013</math>). Azithromycin significantly improved the AQLQ score but there were no significant between-group differences in the ACQ score or lung function</p> <p>In the small study by Sutherland et al. clarithromycin improved airway hyperresponsiveness, increasing the methacholine PC(20) by <math>1.2 \pm 0.5</math> doubling doses (<math>P = .02</math>) in the study population but had no effect on other outcomes..</p> <p>* PEP is a rate of "primary endpoints" which is a combined measure of effect of severe asthma exacerbations and LRTI requiring antibiotics</p> | <ul style="list-style-type: none"> <li>● Rate ratios are difficult to judge (as any relative measure of effect). However, the absolute difference in this study is -0.46 (-0.79 to -0.14) exacerbations per patient-year (Table 2 - primary outcomes). The panel can better consider if less 0.14 exacerbations per patient-year is something meaningful</li> <li>● One approach would be also the NNT (at one year) as 1/absolute difference which seems to be 2 (1 to 7). The absolute difference estimate is adjusted in the trial so this NNT seems reliable. The panel can also judge whether treating 7 patients with azithromycin to avoid one (moderate or severe) exacerbation a year is acceptable.</li> <li>● The panel have to consider that patients with exacerbations (as defined) will need increased doses of steroids, B-agonists, ED visits or hospitalisations</li> </ul> |



|                       |                                                                                                                                                                                                                                                                                                                                                                                                                         |                                                                                                                                                                                                                                                                                                                                                                                                                                                                                                                                                                                                                                                                                                                                                                                                                                                                                                                                                                                                                                                                                                                                                                                                                                                                                                                                                       |                                                                                                                                                                                                                                                                                                                                                 |
|-----------------------|-------------------------------------------------------------------------------------------------------------------------------------------------------------------------------------------------------------------------------------------------------------------------------------------------------------------------------------------------------------------------------------------------------------------------|-------------------------------------------------------------------------------------------------------------------------------------------------------------------------------------------------------------------------------------------------------------------------------------------------------------------------------------------------------------------------------------------------------------------------------------------------------------------------------------------------------------------------------------------------------------------------------------------------------------------------------------------------------------------------------------------------------------------------------------------------------------------------------------------------------------------------------------------------------------------------------------------------------------------------------------------------------------------------------------------------------------------------------------------------------------------------------------------------------------------------------------------------------------------------------------------------------------------------------------------------------------------------------------------------------------------------------------------------------|-------------------------------------------------------------------------------------------------------------------------------------------------------------------------------------------------------------------------------------------------------------------------------------------------------------------------------------------------|
| UNDESIRABLE EFFECTS   | <p><b>How substantial are the undesirable anticipated effects?</b></p> <ul style="list-style-type: none"> <li>○ Large</li> <li>○ Moderate</li> <li>● Small</li> <li>○ Trivial</li> <li>○ Varies</li> <li>○ Don't know</li> </ul>                                                                                                                                                                                        | <p>There were no differences between macrolides and placebo in the number of patients with serious adverse events or treatment withdrawal due to toxicity (Bruselle 2013, Gibson 2017, Strunk 2008, Hahn 2012, Sutherland 2010).</p> <p>The main concern is resistance which has been shown to develop in long-term use of macrolides. In the Azistast study azithromycin was associated with increased oropharyngeal carriage of macrolide-resistant streptococci (87% of the subjects in the azithromycin group and 35% of the subjects in the placebo group were colonised with erythromycin-resistant oropharyngeal streptococci <math>p&lt;0.001</math>).</p> <p>There are more data in the literature about macrolide resistance from studies in other diseases where the medication is used long-term, such as non-CF bronchiectasis, where Valery et al. showed increased resistance to streptococcus pneumoniae and staph aureus rising from 12% to 27% after long term use compared to placebo (<math>p=0.015</math> and <math>0.046</math> respectively). Similar data were found in other studies. (Wong LANCET 2012, Altenburg JAMA 2013).</p> <p>Diarrhoea is the most common adverse event. In the AZISAST study 72 [34%] azithromycin-treated patients experienced diarrhea vs 39 [19%] of those on placebo <math>p=0.001</math>.</p> | <ul style="list-style-type: none"> <li>● This is the most important consideration. However studies in non CF bronchiectasis showed that these bacteria were susceptible to other antibiotics.</li> </ul>                                                                                                                                        |
| CERTAINTY OF EVIDENCE | <p><b>What is the overall certainty of the evidence of effects?</b></p> <ul style="list-style-type: none"> <li>● Very low</li> <li>● Low</li> <li>○ Moderate</li> <li>○ High</li> <li>○ No included studies</li> </ul>                                                                                                                                                                                                  | <p>As shown in the table by Sarah Diver, the certainty of the evidence is low.</p>                                                                                                                                                                                                                                                                                                                                                                                                                                                                                                                                                                                                                                                                                                                                                                                                                                                                                                                                                                                                                                                                                                                                                                                                                                                                    | <p>Our certainty assessment relies on study design (randomized controlled trials), risk of bias, inconsistency, indirectness, and imprecision.</p> <p>Further the certainty is based on the quality of evidence that is lowest among critical outcomes.</p>                                                                                     |
| VALUES                | <p><b>Is there important uncertainty about or variability in how much people value the main outcomes?</b></p> <ul style="list-style-type: none"> <li>○ Important uncertainty or variability</li> <li>○ Possibly important uncertainty or variability</li> <li>○ Probably no important uncertainty or variability</li> <li>● No important uncertainty or variability</li> <li>○ No known undesirable outcomes</li> </ul> | <p>No evidence identified.</p>                                                                                                                                                                                                                                                                                                                                                                                                                                                                                                                                                                                                                                                                                                                                                                                                                                                                                                                                                                                                                                                                                                                                                                                                                                                                                                                        | <p>There is no important uncertainty about how patients and clinicians assess asthma exacerbations. There is more variability concerning QoL which however is a patient related outcome. Regarding the interpretation of lung function which is more objective there doesn't seem to be any effect of macrolide treatment on lung function.</p> |

|                                             |                                                                                                                                                                                                                                                                                                                                                                                                                                   |                                                                                                                                                                                                                                                     |                                                                                                                                                                                                                                                                                                                                                                                                                                                                                                                                          |
|---------------------------------------------|-----------------------------------------------------------------------------------------------------------------------------------------------------------------------------------------------------------------------------------------------------------------------------------------------------------------------------------------------------------------------------------------------------------------------------------|-----------------------------------------------------------------------------------------------------------------------------------------------------------------------------------------------------------------------------------------------------|------------------------------------------------------------------------------------------------------------------------------------------------------------------------------------------------------------------------------------------------------------------------------------------------------------------------------------------------------------------------------------------------------------------------------------------------------------------------------------------------------------------------------------------|
| BALANCE OF EFFECTS                          | <p><b>Does the balance between desirable and undesirable effects favor the intervention or the comparison?</b></p> <ul style="list-style-type: none"> <li>○ Favors the comparison</li> <li>○ Probably favors the comparison</li> <li>○ Does not favor either the intervention or the comparison</li> <li>● Probably favors the intervention</li> <li>○ Favors the intervention</li> <li>○ Varies</li> <li>○ Don't know</li> </ul> | Diarrhea does not seem to be a major concern, however the problem of resistance needs to be evaluated long-term in actual clinical studies (not only laboratory testing).                                                                           | <p>The group placed a higher value on the potential benefit of reduction in exacerbations which can be life-threatening and the potential positive impact in quality of life. Potential adverse events were considered to have a lower value.</p> <p>Regarding resistance in particular, which is a concern, the studies show that the bacteria are susceptible to other commonly used antibiotics</p>                                                                                                                                   |
| COST EFFECTIVENESS                          | <p><b>Does the cost-effectiveness of the intervention favor the intervention or the comparison?</b></p> <ul style="list-style-type: none"> <li>○ Favors the comparison</li> <li>○ Probably favors the comparison</li> <li>○ Does not favor either the intervention or the comparison</li> <li>○ Probably favors the intervention</li> <li>● Favors the intervention</li> <li>○ Varies</li> <li>○ No included studies</li> </ul>   | If, as the statistician points out, 7 patients need to be treated to avoid 1 exacerbation then probably the cost-effectiveness favors the intervention as the cost of the intervention is low while direct/indirect costs of exacerbations are high | <p>No cost-effectiveness studies have been identified however the impact of asthma exacerbations on health care costs among patients with moderate and severe persistent asthma are estimated to be 9,223 USD compared to 5,011 USD in those asthmatic patients without exacerbations (Ivanova 2012).</p> <p>The estimated total healthcare cost of patients with exacerbations is 4,212 USD per year.</p> <p>Considering that macrolides are low-cost interventions, the panel considers that the intervention will be cost-saving.</p> |
| CERTAINTY OF EVIDENCE OF REQUIRED RESOURCES | <p><b>What is the certainty of the evidence of resource requirements (costs)?</b></p> <ul style="list-style-type: none"> <li>○ Very low</li> <li>○ Low</li> <li>○ Moderate</li> <li>○ High</li> <li>● No included studies</li> </ul>                                                                                                                                                                                              | No specific studies were identified, however due to the relatively low cost of macrolides resource requirements are expected to be low.                                                                                                             |                                                                                                                                                                                                                                                                                                                                                                                                                                                                                                                                          |
| EQUITY                                      | <p><b>What would be the impact on health equity?</b></p> <ul style="list-style-type: none"> <li>○ Reduced</li> </ul>                                                                                                                                                                                                                                                                                                              | No evidence identified.                                                                                                                                                                                                                             | In the US, racial and ethnic minorities, and individuals of lower socioeconomic status have been documented to have less access to specialty clinics and are less likely to use expensive controller therapy for asthma.                                                                                                                                                                                                                                                                                                                 |

|               |                                                                                                                                                                                                                                |                         |                                                                                                                                                                                                                                                                                                                                  |
|---------------|--------------------------------------------------------------------------------------------------------------------------------------------------------------------------------------------------------------------------------|-------------------------|----------------------------------------------------------------------------------------------------------------------------------------------------------------------------------------------------------------------------------------------------------------------------------------------------------------------------------|
|               | <ul style="list-style-type: none"> <li>○ Probably reduced</li> <li>○ Probably no impact</li> <li>● Probably increased</li> <li>○ Increased</li> <li>○ Varies</li> <li>○ Don't know</li> </ul>                                  |                         | Macrolides might be an easy and feasible strategy.                                                                                                                                                                                                                                                                               |
| ACCEPTABILITY | <p><b>Is the intervention acceptable to key stakeholders?</b></p> <ul style="list-style-type: none"> <li>○ No</li> <li>○ Probably no</li> <li>○ Probably yes</li> <li>○ Yes</li> <li>● Varies</li> <li>○ Don't know</li> </ul> | No evidence identified. | <p>Most patients with severe asthma welcome any possibility of improvement through treatment although they are concerned about medication use</p> <p>Health insurance companies and clinic administrations should find macrolides acceptable due to their relatively low cost however there is concern about the resistance.</p> |
| FEASIBILITY   | <p><b>Is the intervention feasible to implement?</b></p> <ul style="list-style-type: none"> <li>○ No</li> <li>○ Probably no</li> <li>● Probably yes</li> <li>○ Yes</li> <li>○ Varies</li> <li>○ Don't know</li> </ul>          | Probably yes.           | Macrolides are relatively cheap and are available world-wide. .                                                                                                                                                                                                                                                                  |

## Should an anti-interleukin 4/13 strategy be used for adults and children with severe asthma?

**Evidence Profile:** 300 mg of dupilumab every 2 weeks compared to placebo for patients with severe asthma according to blood eosinophils

**Bibliography:** Castro M, Corren J, Pavord ID, Maspero J, Wenzel S, Rabe KF, Busse WW, Ford L, Sher L, FitzGerald JM, Katelaris C, Tohda Y, Zhang B, Staudinger H, Pirozzi G, Amin N, Ruddy M, Akinlade B, Khan A, Chao J, Martincova R, Graham NMH, Hamilton JD, Swanson BN, Stahl N, Yancopoulos GD, Teper A. Dupilumab Efficacy and Safety in Moderate-to-Severe Uncontrolled Asthma. *N Engl J Med.* 2018;378(26):2486-2496. doi: 10.1056/NEJMoa1804092. Wenzel S, Castro M, Corren J, Maspero J, Wang L, Zhang B, Pirozzi G, Sutherland ER, Evans RR, Joish VN, Eckert L, Graham NM, Stahl N, Yancopoulos GD, Louis-Tisserand M, Teper A. Dupilumab efficacy and safety in adults with uncontrolled persistent asthma despite use of medium-to-high-dose inhaled corticosteroids plus a long-acting  $\beta_2$  agonist: a randomised double-blind placebo-controlled pivotal phase 2b dose-ranging trial. *Lancet.* 2016;388(10039):31-44. doi: 10.1016/S0140-6736(16)30307-5.

| Certainty assessment |              |              |               |              |             |                      | No of patients                    |         | Effect            |                   | Certainty | Importance |
|----------------------|--------------|--------------|---------------|--------------|-------------|----------------------|-----------------------------------|---------|-------------------|-------------------|-----------|------------|
| No of studies        | Study design | Risk of bias | Inconsistency | Indirectness | Imprecision | Other considerations | 300 mg of dupilumab every 2 weeks | placebo | Relative (95% CI) | Absolute (95% CI) |           |            |

**EXACERBATION - annualised severe exacerbation event rate at week 24 (according to blood eosinophil 300 cells/mm<sup>3</sup> or more)**

|                  |                   |                      |             |             |             |      |       |       |                                   |                                                                             |                  |  |
|------------------|-------------------|----------------------|-------------|-------------|-------------|------|-------|-------|-----------------------------------|-----------------------------------------------------------------------------|------------------|--|
| 2 <sup>1,2</sup> | randomised trials | serious <sup>a</sup> | not serious | not serious | not serious | none | -/109 | -/112 | Rate ratio 0.25<br>(0.14 to 0.46) | Low                                                                         | ⊕⊕⊕○<br>MODERATE |  |
|                  |                   |                      |             |             |             |      |       |       |                                   | 84 less severe exacerbations per 100 patients per year<br>(from 49 to 139)  |                  |  |
|                  |                   |                      |             |             |             |      |       |       |                                   | High                                                                        |                  |  |
|                  |                   |                      |             |             |             |      |       |       |                                   | 124 less severe exacerbations per 100 patients per year<br>(from 94 to 155) |                  |  |

**EXACERBATION - annualised severe exacerbation event rate at week 24 (according to blood eosinophil <300 cells/mm<sup>3</sup>)**

|                  |                   |                      |             |             |             |      |       |       |                                   |                                                                           |                  |  |
|------------------|-------------------|----------------------|-------------|-------------|-------------|------|-------|-------|-----------------------------------|---------------------------------------------------------------------------|------------------|--|
| 2 <sup>1,2</sup> | randomised trials | serious <sup>a</sup> | not serious | not serious | not serious | none | 0/156 | 0/148 | Rate ratio 0.49<br>(0.31 to 0.76) | Low                                                                       | ⊕⊕⊕○<br>MODERATE |  |
|                  |                   |                      |             |             |             |      |       |       |                                   | 47 less severe exacerbations per 100 patients per year<br>(from 32 to 65) |                  |  |
|                  |                   |                      |             |             |             |      |       |       |                                   | High                                                                      |                  |  |

| Certainty assessment |              |              |               |              |             |                      | № of patients                     |         | Effect            |                                                                                  | Certainty | Importance |
|----------------------|--------------|--------------|---------------|--------------|-------------|----------------------|-----------------------------------|---------|-------------------|----------------------------------------------------------------------------------|-----------|------------|
| № of studies         | Study design | Risk of bias | Inconsistency | Indirectness | Imprecision | Other considerations | 300 mg of dupilumab every 2 weeks | placebo | Relative (95% CI) | Absolute (95% CI)                                                                |           |            |
|                      |              |              |               |              |             |                      |                                   |         |                   | <b>66 less severe exacerbations per 100 patients per year</b><br>(from 54 to 76) |           |            |

**LUNG FUNCTION - change in FEV1 from baseline at week 24 (according to blood eosinophil 300 cells/mm3 or more) (assessed with: Liters)**

|                  |                   |                      |             |             |                      |      |     |    |   |                                                                     |             |  |
|------------------|-------------------|----------------------|-------------|-------------|----------------------|------|-----|----|---|---------------------------------------------------------------------|-------------|--|
| 2 <sup>1,2</sup> | randomised trials | serious <sup>a</sup> | not serious | not serious | serious <sup>b</sup> | none | 103 | 91 | - | least square MD <b>0.21 Liters more</b><br>(0.06 more to 0.35 more) | ⊕⊕○○<br>LOW |  |
|------------------|-------------------|----------------------|-------------|-------------|----------------------|------|-----|----|---|---------------------------------------------------------------------|-------------|--|

**LUNG FUNCTION - change in FEV1 from baseline at week 24 (according to blood eosinophil <300 cells/mm3) (assessed with: Liters)**

|                  |                   |                      |             |             |             |      |     |     |   |                                                                     |                  |  |
|------------------|-------------------|----------------------|-------------|-------------|-------------|------|-----|-----|---|---------------------------------------------------------------------|------------------|--|
| 2 <sup>1,2</sup> | randomised trials | serious <sup>a</sup> | not serious | not serious | not serious | none | 137 | 138 | - | least square MD <b>0.14 Liters more</b><br>(0.05 more to 0.22 more) | ⊕⊕⊕○<br>MODERATE |  |
|------------------|-------------------|----------------------|-------------|-------------|-------------|------|-----|-----|---|---------------------------------------------------------------------|------------------|--|

**LUNG FUNCTION - change in FEV1 from baseline at week 24 (according to blood eosinophil 300 cells/mm3 or more) (assessed with: % of change; Scale from: 0 to 100)**

|                |                   |                      |             |             |                      |      |    |    |   |                                                                                 |             |  |
|----------------|-------------------|----------------------|-------------|-------------|----------------------|------|----|----|---|---------------------------------------------------------------------------------|-------------|--|
| 1 <sup>1</sup> | randomised trials | serious <sup>c</sup> | not serious | not serious | serious <sup>d</sup> | none | 58 | 52 | - | least square MD <b>12.09 percentage points more</b><br>(3.2 more to 20.97 more) | ⊕⊕○○<br>LOW |  |
|----------------|-------------------|----------------------|-------------|-------------|----------------------|------|----|----|---|---------------------------------------------------------------------------------|-------------|--|

**LUNG FUNCTION - change in FEV1 from baseline at week 24 (according to blood eosinophil <300 cells/mm3) (assessed with: % of change; Scale from: 0 to 100)**

|                |                   |                      |             |             |                      |      |    |    |   |                                                                                |             |  |
|----------------|-------------------|----------------------|-------------|-------------|----------------------|------|----|----|---|--------------------------------------------------------------------------------|-------------|--|
| 1 <sup>1</sup> | randomised trials | serious <sup>c</sup> | not serious | not serious | serious <sup>d</sup> | none | 85 | 73 | - | least square MD <b>7.9 percentage points more</b><br>(1.98 more to 13.81 more) | ⊕⊕○○<br>LOW |  |
|----------------|-------------------|----------------------|-------------|-------------|----------------------|------|----|----|---|--------------------------------------------------------------------------------|-------------|--|

**ASTHMA CONTROL - at week 24 according to blood eosinophil 300 cells/mm3 or more (assessed with: ACQ-5; Scale from: 0 to 6)<sup>e</sup>**

|                |                   |                      |                          |             |                      |      |    |    |   |                                                                           |             |  |
|----------------|-------------------|----------------------|--------------------------|-------------|----------------------|------|----|----|---|---------------------------------------------------------------------------|-------------|--|
| 1 <sup>1</sup> | randomised trials | serious <sup>c</sup> | not serious <sup>f</sup> | not serious | serious <sup>b</sup> | none | 58 | 52 | - | least square MD <b>0.55 ACQ-5 units lower</b><br>(0.9 lower to 0.2 lower) | ⊕⊕○○<br>LOW |  |
|----------------|-------------------|----------------------|--------------------------|-------------|----------------------|------|----|----|---|---------------------------------------------------------------------------|-------------|--|

| Certainty assessment |              |              |               |              |             |                      | № of patients                     |         | Effect            |                   | Certainty | Importance |
|----------------------|--------------|--------------|---------------|--------------|-------------|----------------------|-----------------------------------|---------|-------------------|-------------------|-----------|------------|
| № of studies         | Study design | Risk of bias | Inconsistency | Indirectness | Imprecision | Other considerations | 300 mg of dupilumab every 2 weeks | placebo | Relative (95% CI) | Absolute (95% CI) |           |            |

**ASTHMA CONTROL - at week 24 according to blood eosinophil <300 cells/mm3 (assessed with: ACQ-5; Scale from: 0 to 6)<sup>a</sup>**

|                |                   |                      |                          |             |             |      |    |    |   |                                                                             |                  |  |
|----------------|-------------------|----------------------|--------------------------|-------------|-------------|------|----|----|---|-----------------------------------------------------------------------------|------------------|--|
| 1 <sup>1</sup> | randomised trials | serious <sup>c</sup> | not serious <sup>f</sup> | not serious | not serious | none | 87 | 75 | - | least square MD <b>0.17 ACQ-5 units lower</b><br>(0.44 lower to 0.1 higher) | ⊕⊕⊕○<br>MODERATE |  |
|----------------|-------------------|----------------------|--------------------------|-------------|-------------|------|----|----|---|-----------------------------------------------------------------------------|------------------|--|

**QUALITY OF LIFE - at week 24 according to blood eosinophil 300 cells/mm3 or more (assessed with: AQLQ ; Scale from: 0 to 7)<sup>a</sup>**

|                |                   |                      |                          |             |                      |      |    |    |   |                                                                               |             |  |
|----------------|-------------------|----------------------|--------------------------|-------------|----------------------|------|----|----|---|-------------------------------------------------------------------------------|-------------|--|
| 1 <sup>1</sup> | randomised trials | serious <sup>c</sup> | not serious <sup>f</sup> | not serious | serious <sup>b</sup> | none | 56 | 53 | - | least square MD <b>0.78 AQLQ units higher</b><br>(0.42 higher to 1.15 higher) | ⊕⊕○○<br>LOW |  |
|----------------|-------------------|----------------------|--------------------------|-------------|----------------------|------|----|----|---|-------------------------------------------------------------------------------|-------------|--|

**QUALITY OF LIFE - at week 24 according to blood eosinophil <300 cells/mm3 (assessed with: AQLQ; Scale from: 0 to 7)<sup>a</sup>**

|                |                   |                      |                          |             |             |      |    |    |   |                                                                              |                  |  |
|----------------|-------------------|----------------------|--------------------------|-------------|-------------|------|----|----|---|------------------------------------------------------------------------------|------------------|--|
| 1 <sup>1</sup> | randomised trials | serious <sup>c</sup> | not serious <sup>f</sup> | not serious | not serious | none | 85 | 74 | - | least square MD <b>0.06 AQLQ units higher</b><br>(0.24 lower to 0.36 higher) | ⊕⊕⊕○<br>MODERATE |  |
|----------------|-------------------|----------------------|--------------------------|-------------|-------------|------|----|----|---|------------------------------------------------------------------------------|------------------|--|

**Reduction in the glucocorticoid dose at week 24 ( according to blood eosinophil 300 cells/mm3 or more) (assessed with: % reduction; Scale from: 0 to 100)**

|                |                   |                      |                          |             |                      |      |    |    |   |                                                                                    |             |  |
|----------------|-------------------|----------------------|--------------------------|-------------|----------------------|------|----|----|---|------------------------------------------------------------------------------------|-------------|--|
| 1 <sup>2</sup> | randomised trials | serious <sup>h</sup> | not serious <sup>f</sup> | not serious | serious <sup>i</sup> | none | 48 | 41 | - | least square MD <b>36.38 percentage points lower</b><br>(54.7 lower to 18.9 lower) | ⊕⊕○○<br>LOW |  |
|----------------|-------------------|----------------------|--------------------------|-------------|----------------------|------|----|----|---|------------------------------------------------------------------------------------|-------------|--|

**Reduction in the glucocorticoid dose at week 24 ( according to blood eosinophil <300 cells/mm3) (Scale from: 0 to 100)**

|                |                   |                      |                          |             |                      |      |    |    |   |                                                                                  |             |  |
|----------------|-------------------|----------------------|--------------------------|-------------|----------------------|------|----|----|---|----------------------------------------------------------------------------------|-------------|--|
| 1 <sup>2</sup> | randomised trials | serious <sup>h</sup> | not serious <sup>f</sup> | not serious | serious <sup>i</sup> | none | 55 | 66 | - | least square MD <b>21.3 percentage points lower</b><br>(38.8 lower to 3.9 lower) | ⊕⊕○○<br>LOW |  |
|----------------|-------------------|----------------------|--------------------------|-------------|----------------------|------|----|----|---|----------------------------------------------------------------------------------|-------------|--|

**CI:** Confidence interval

**Explanations**

- a. Relevant and differential attrition bias in NCT01854047 (Wenzel 2016) for placebo and dupilumab groups (more than 20% and around 10% respectively); Randomization was not stratified by blood eosinophil count and current 300 cells/mm<sup>3</sup> was not included as a co-variate in the analysis (Rabe 2018)
- b. the lower CI boundary crosses the threshold for minimal important difference
- c. Relevant and differential attrition bias in NCT01854047 (Wenzel 2016) for placebo and dupilumab groups (more than 20% and around 10% respectively)
- d. Minimal important differences not known for % reduction in the FEV<sub>1</sub>, however the 95CI is wide and does not exclude important benefit or no effect.
- e. minimal important difference for ACQ-5 is 0.5; lower values indicate better asthma control.
- f. not applicable (findings from 1 trial)
- g. minimal important difference for AQLQ is 0.5; higher scores indicates better QoL.
- h. Subgroup analysis, randomization was not stratified by blood eosinophil count and current 300 cells/mm<sup>3</sup> was not included as a co-variate in the analysis.
- i. Minimal important differences not known for % reduction in the glucocorticoid doses, however the 95CI is wide and does not exclude important benefit or no effect.

## References

1. Wenzel S, Castro M, Corren J, Maspero J, Wang L, Zhang B, Pirozzi G, Sutherland ER, Evans RR, Joish VN, Eckert L, Graham NM, Stahl N, Yancopoulos GD, Louis-Tisserand M, Teper A.. Dupilumab efficacy and safety in adults with uncontrolled persistent asthma despite use of medium-to-high-dose inhaled corticosteroids plus a long-acting  $\beta_2$  agonist: a randomised double-blind placebo-controlled pivotal phase 2b dose-ranging trial. *Lancet*; 2016.
2. Rabe KF, Nair P, Brusselle G, Maspero JF, Castro M, Sher L, Zhu H, Hamilton JD, Swanson BN, Khan A, Chao J, Staudinger H, Pirozzi G, Antoni C, Amin N, Ruddy M, Akinlade B, Graham NMH, Stahl N, Yancopoulos GD, Teper A.. Efficacy and Safety of Dupilumab in Glucocorticoid-Dependent Severe Asthma. *N Eng J Med*; 2018.

## Evidence Profile: 300 mg of dupilumab every 2 weeks compared to placebo for patients with uncontrolled asthma

**Bibliography:** Castro M, Corren J, Pavord ID, Maspero J, Wenzel S, Rabe KF, Busse WW, Ford L, Sher L, FitzGerald JM, Katelaris C, Tohda Y, Zhang B, Staudinger H, Pirozzi G, Amin N, Ruddy M, Akinlade B, Khan A, Chao J, Martinova R, Graham NMH, Hamilton JD, Swanson BN, Stahl N, Yancopoulos GD, Teper A. Dupilumab Efficacy and Safety in Moderate-to-Severe Uncontrolled Asthma. *N Engl J Med.* 2018;378(26):2486-2496. doi: 10.1056/NEJMoa1804092. Wenzel S, Castro M, Corren J, Maspero J, Wang L, Zhang B, Pirozzi G, Sutherland ER, Evans RR, Joish VN, Eckert L, Graham NM, Stahl N, Yancopoulos GD, Louis-Tisserand M, Teper A. Dupilumab efficacy and safety in adults with uncontrolled persistent asthma despite use of medium-to-high-dose inhaled corticosteroids plus a long-acting  $\beta_2$  agonist: a randomised double-blind placebo-controlled pivotal phase 2b dose-ranging trial. *Lancet.* 2016;388(10039):31-44. doi: 10.1016/S0140-6736(16)30307-5.

| Certainty assessment |              |              |               |              |             |                      | No of patients                    |         | Effect            |                   | Certainty | Importance |
|----------------------|--------------|--------------|---------------|--------------|-------------|----------------------|-----------------------------------|---------|-------------------|-------------------|-----------|------------|
| No of studies        | Study design | Risk of bias | Inconsistency | Indirectness | Imprecision | Other considerations | 300 mg of dupilumab every 2 weeks | placebo | Relative (95% CI) | Absolute (95% CI) |           |            |

### EXACERBATION - annualised severe exacerbation event rate (dupilumab during 24 weeks)

|   |                   |                      |                          |             |             |      |                                                                                                                                                                                                                                                     |  |  |                  |  |
|---|-------------------|----------------------|--------------------------|-------------|-------------|------|-----------------------------------------------------------------------------------------------------------------------------------------------------------------------------------------------------------------------------------------------------|--|--|------------------|--|
| 1 | randomised trials | serious <sup>a</sup> | not serious <sup>b</sup> | not serious | not serious | none | NCT01854047 (Wenzel 2016) reported a risk reduction in event rates of 70.5% (45.4 to 84.1) in favour of 24 weeks of treatment (exacerbation rate for dupilumab 0.265 (0.157 to 0.445) versus exacerbation rate for placebo 0.897 (0.619 to 1.300)). |  |  | ⊕⊕⊕○<br>MODERATE |  |
|---|-------------------|----------------------|--------------------------|-------------|-------------|------|-----------------------------------------------------------------------------------------------------------------------------------------------------------------------------------------------------------------------------------------------------|--|--|------------------|--|

### EXACERBATION - annualised severe exacerbation event rate (dupilumab during 52 weeks)

|   |                   |                      |                          |             |             |      |                                                                                                                                                                                                                                               |  |  |                  |  |
|---|-------------------|----------------------|--------------------------|-------------|-------------|------|-----------------------------------------------------------------------------------------------------------------------------------------------------------------------------------------------------------------------------------------------|--|--|------------------|--|
| 1 | randomised trials | serious <sup>c</sup> | not serious <sup>b</sup> | not serious | not serious | none | NCT02414854 (Castro 2018) reported a risk reduction in event rates of 46% (32 to 57) in favour of 52 weeks of treatment (exacerbation rate for dupilumab 0.456 (0.389 to 0.534) versus exacerbation rate for placebo 0.970 (0.810 to 1.160)). |  |  | ⊕⊕⊕○<br>MODERATE |  |
|---|-------------------|----------------------|--------------------------|-------------|-------------|------|-----------------------------------------------------------------------------------------------------------------------------------------------------------------------------------------------------------------------------------------------|--|--|------------------|--|

### ASTHMA CONTROL (assessed with: ACQ-5 (dupilumab during 24 weeks); Scale from: 0 to 6)<sup>d</sup>

|   |                   |                        |             |             |             |      |     |     |   |                                                                          |                  |  |
|---|-------------------|------------------------|-------------|-------------|-------------|------|-----|-----|---|--------------------------------------------------------------------------|------------------|--|
| 2 | randomised trials | serious <sup>a,c</sup> | not serious | not serious | not serious | none | 790 | 479 | - | least square MD <b>0.22 ACQ-5 units lower</b> (0.34 lower to 0.11 lower) | ⊕⊕⊕○<br>MODERATE |  |
|---|-------------------|------------------------|-------------|-------------|-------------|------|-----|-----|---|--------------------------------------------------------------------------|------------------|--|

### ASTHMA CONTROL (assessed with: ACQ-5 (dupilumab during 52 weeks); Scale from: 0 to 6)<sup>d</sup>

|   |                   |                      |                          |             |             |      |     |     |   |                                                                                       |                  |  |
|---|-------------------|----------------------|--------------------------|-------------|-------------|------|-----|-----|---|---------------------------------------------------------------------------------------|------------------|--|
| 1 | randomised trials | serious <sup>c</sup> | not serious <sup>b</sup> | not serious | not serious | none | 633 | 321 | - | least square MD <b>0.22 ACQ-5 units lower</b> (0.36 lower to 0.08 lower) <sup>e</sup> | ⊕⊕⊕○<br>MODERATE |  |
|---|-------------------|----------------------|--------------------------|-------------|-------------|------|-----|-----|---|---------------------------------------------------------------------------------------|------------------|--|

### QUALITY OF LIFE (assessed with: AQLQ (dupilumab during 24 weeks); Scale from: 0 to 7)<sup>f</sup>



| Certainty assessment |                   |                        |               |              |             |                      | № of patients                     |         | Effect            |                                                                            | Certainty        | Importance |
|----------------------|-------------------|------------------------|---------------|--------------|-------------|----------------------|-----------------------------------|---------|-------------------|----------------------------------------------------------------------------|------------------|------------|
| № of studies         | Study design      | Risk of bias           | Inconsistency | Indirectness | Imprecision | Other considerations | 300 mg of dupilumab every 2 weeks | placebo | Relative (95% CI) | Absolute (95% CI)                                                          |                  |            |
| 2                    | randomised trials | serious <sup>a,c</sup> | not serious   | not serious  | not serious | none                 | 790                               | 479     | -                 | least square MD <b>0.23 AQLQ units higher</b> (0.03 higher to 0.43 higher) | ⊕⊕⊕○<br>MODERATE |            |

QUALITY OF LIFE (assessed with: AQLQ (dupilumab during 52 weeks); Scale from: 0 to 7)<sup>f</sup>

|   |                   |                      |                          |             |             |      |     |     |   |                                                                                        |                  |  |
|---|-------------------|----------------------|--------------------------|-------------|-------------|------|-----|-----|---|----------------------------------------------------------------------------------------|------------------|--|
| 1 | randomised trials | serious <sup>c</sup> | not serious <sup>b</sup> | not serious | not serious | none | 633 | 321 | - | least square MD <b>0.26 AQLQ units higher</b> (0.12 higher to 0.4 higher) <sup>e</sup> | ⊕⊕⊕○<br>MODERATE |  |
|---|-------------------|----------------------|--------------------------|-------------|-------------|------|-----|-----|---|----------------------------------------------------------------------------------------|------------------|--|

SIDE EFFECTS (assessed with: any side effect (dupilumab during 24 weeks))

|   |                   |                      |                          |             |             |      |                 |                 |                        |                                          |                  |  |
|---|-------------------|----------------------|--------------------------|-------------|-------------|------|-----------------|-----------------|------------------------|------------------------------------------|------------------|--|
| 1 | randomised trials | serious <sup>a</sup> | not serious <sup>b</sup> | not serious | not serious | none | 121/156 (77.6%) | 118/158 (74.7%) | RR 1.04 (0.92 to 1.18) | 3 more per 100 (from 6 fewer to 13 more) | ⊕⊕⊕○<br>MODERATE |  |
|---|-------------------|----------------------|--------------------------|-------------|-------------|------|-----------------|-----------------|------------------------|------------------------------------------|------------------|--|

SIDE EFFECTS (assessed with: any side effect (dupilumab during 52 weeks))

|   |                   |                      |                          |             |             |      |                 |                 |                        |                                          |                  |  |
|---|-------------------|----------------------|--------------------------|-------------|-------------|------|-----------------|-----------------|------------------------|------------------------------------------|------------------|--|
| 1 | randomised trials | serious <sup>c</sup> | not serious <sup>b</sup> | not serious | not serious | none | 515/632 (81.5%) | 270/321 (84.1%) | RR 0.97 (0.91 to 1.03) | 3 fewer per 100 (from 8 fewer to 3 more) | ⊕⊕⊕○<br>MODERATE |  |
|---|-------------------|----------------------|--------------------------|-------------|-------------|------|-----------------|-----------------|------------------------|------------------------------------------|------------------|--|

SIDE EFFECTS (assessed with: any serious side effect (dupilumab during 24 weeks))

|   |                   |                      |                          |             |                      |      |               |              |                        |                                          |             |  |
|---|-------------------|----------------------|--------------------------|-------------|----------------------|------|---------------|--------------|------------------------|------------------------------------------|-------------|--|
| 1 | randomised trials | serious <sup>a</sup> | not serious <sup>b</sup> | not serious | serious <sup>g</sup> | none | 13/156 (8.3%) | 9/158 (5.7%) | RR 1.46 (0.64 to 3.32) | 3 more per 100 (from 2 fewer to 13 more) | ⊕⊕○○<br>LOW |  |
|---|-------------------|----------------------|--------------------------|-------------|----------------------|------|---------------|--------------|------------------------|------------------------------------------|-------------|--|

SIDE EFFECTS (assessed with: any serious side effect (dupilumab during 52 weeks))

|   |                   |                      |                          |             |                      |      |               |               |                        |                                          |             |  |
|---|-------------------|----------------------|--------------------------|-------------|----------------------|------|---------------|---------------|------------------------|------------------------------------------|-------------|--|
| 1 | randomised trials | serious <sup>c</sup> | not serious <sup>b</sup> | not serious | serious <sup>h</sup> | none | 55/632 (8.7%) | 27/321 (8.4%) | RR 1.03 (0.67 to 1.61) | 0 fewer per 100 (from 3 fewer to 5 more) | ⊕⊕○○<br>LOW |  |
|---|-------------------|----------------------|--------------------------|-------------|----------------------|------|---------------|---------------|------------------------|------------------------------------------|-------------|--|

| Certainty assessment |              |              |               |              |             |                      | № of patients                     |         | Effect            |                   | Certainty | Importance |
|----------------------|--------------|--------------|---------------|--------------|-------------|----------------------|-----------------------------------|---------|-------------------|-------------------|-----------|------------|
| № of studies         | Study design | Risk of bias | Inconsistency | Indirectness | Imprecision | Other considerations | 300 mg of dupilumab every 2 weeks | placebo | Relative (95% CI) | Absolute (95% CI) |           |            |

**SIDE EFFECTS (assessed with: injection site reactions (dupilumab during 24 weeks))**

|   |                   |                      |                          |             |                      |      |                |                |                                  |                                                    |             |  |
|---|-------------------|----------------------|--------------------------|-------------|----------------------|------|----------------|----------------|----------------------------------|----------------------------------------------------|-------------|--|
| 1 | randomised trials | serious <sup>a</sup> | not serious <sup>b</sup> | not serious | serious <sup>g</sup> | none | 41/156 (26.3%) | 21/158 (13.3%) | <b>RR 1.98</b><br>(1.23 to 3.19) | <b>13 more per 100</b><br>(from 3 more to 29 more) | ⊕⊕○○<br>LOW |  |
|---|-------------------|----------------------|--------------------------|-------------|----------------------|------|----------------|----------------|----------------------------------|----------------------------------------------------|-------------|--|

**SIDE EFFECTS (assessed with: injection site reactions (dupilumab during 52 weeks))**

|   |                   |                      |                          |             |                      |      |                 |                |                                  |                                                   |             |  |
|---|-------------------|----------------------|--------------------------|-------------|----------------------|------|-----------------|----------------|----------------------------------|---------------------------------------------------|-------------|--|
| 1 | randomised trials | serious <sup>c</sup> | not serious <sup>b</sup> | not serious | serious <sup>h</sup> | none | 116/632 (18.4%) | 33/321 (10.3%) | <b>RR 1.79</b><br>(1.24 to 2.57) | <b>8 more per 100</b><br>(from 2 more to 16 more) | ⊕⊕○○<br>LOW |  |
|---|-------------------|----------------------|--------------------------|-------------|----------------------|------|-----------------|----------------|----------------------------------|---------------------------------------------------|-------------|--|

**CI:** Confidence interval; **RR:** Risk ratio

**Explanations**

- a. potential attrition bias in NCT01854047 (Wenzel 2016): trial report described an intention to treat analysis but results reported in tables does not fit with the intention to treat population
- b. not applicable (findings from 1 trial)
- c. potential attrition bias in NCT02414854 (Castro 2018): 75% participants completed the study. Reasons for discontinuation were not declared for 46% of patients that did not completed the 52 weeks intervention period.
- d. minimal important difference for ACQ-5 is 0.5; lower values indicate better asthma control.
- e. Castro 2018 reported effect estimates with standard errors. The effect estimated in the SoF table has been recalculated with the RevMan 5.3 statistical package
- f. minimal important difference for AQLQ is 0.5; higher scores indicates better QoL.
- g. low event rate, resulting in imprecise effect estimate
- h. imprecision of results resulting from the results from Castro 2018 (planned treatment duration of 52 weeks)

## Evidence Profile: 300 mg of dupilumab every 2 weeks compared to placebo for glucocorticoid dependent severe asthma

**Bibliography:** Rabe KF, Nair P, Brusselle G, Maspero JF, Castro M, Sher L, Zhu H, Hamilton JD, Swanson BN, Khan A, Chao J, Staudinger H, Pirozzi G, Antoni C, Amin N, Ruddy M, Akinlade B, Graham NMH, Stahl N, Yancopoulos GD, Teper A. Efficacy and Safety of Dupilumab in Glucocorticoid-Dependent Severe Asthma. N Engl J Med. 2018;378(26):2475-2485. doi: 10.1056/NEJMoa1804093.

| Certainty assessment |              |              |               |              |             |                      | № of patients                     |         | Effect            |                   | Certainty | Importance |
|----------------------|--------------|--------------|---------------|--------------|-------------|----------------------|-----------------------------------|---------|-------------------|-------------------|-----------|------------|
| № of studies         | Study design | Risk of bias | Inconsistency | Indirectness | Imprecision | Other considerations | 300 mg of dupilumab every 2 weeks | placebo | Relative (95% CI) | Absolute (95% CI) |           |            |

### EXACERBATION - annualised severe exacerbation event rate (dupilumab during 24 weeks)

|   |                   |             |                          |             |             |      |                                                                                                                                                                                                                                             |  |  |  |              |  |
|---|-------------------|-------------|--------------------------|-------------|-------------|------|---------------------------------------------------------------------------------------------------------------------------------------------------------------------------------------------------------------------------------------------|--|--|--|--------------|--|
| 1 | randomised trials | not serious | not serious <sup>a</sup> | not serious | not serious | none | NCT02528214 (Rabe 2018) reported a risk reduction in event rates of 59.3% (37 to 73.7) favouring 24 weeks of treatment (exacerbation rate for dupilumab 0.649 (0.442 to 0.955) versus exacerbation rate for placebo 1.597 (1.248 to 2.043). |  |  |  | ⊕⊕⊕⊕<br>HIGH |  |
|---|-------------------|-------------|--------------------------|-------------|-------------|------|---------------------------------------------------------------------------------------------------------------------------------------------------------------------------------------------------------------------------------------------|--|--|--|--------------|--|

### ASTHMA CONTROL (assessed with: ACQ-5 (dupilumab during 24 weeks))<sup>b</sup>

|   |                   |             |                          |             |                      |      |                                                                                                                             |  |  |  |                  |  |
|---|-------------------|-------------|--------------------------|-------------|----------------------|------|-----------------------------------------------------------------------------------------------------------------------------|--|--|--|------------------|--|
| 1 | randomised trials | not serious | not serious <sup>a</sup> | not serious | serious <sup>b</sup> | none | NCT02528214 (Rabe 2018) reported a least square MD of -0.47 (-0.76 to -0.18) favouring 24 weeks of treatment with dupilumab |  |  |  | ⊕⊕⊕○<br>MODERATE |  |
|---|-------------------|-------------|--------------------------|-------------|----------------------|------|-----------------------------------------------------------------------------------------------------------------------------|--|--|--|------------------|--|

### LUNG FUNCTION (change in FEV1 from baseline to end of treatment) (assessed with: liters)

|   |                   |             |                          |             |                      |      |                                                                                                                                                                                |  |  |  |                  |  |
|---|-------------------|-------------|--------------------------|-------------|----------------------|------|--------------------------------------------------------------------------------------------------------------------------------------------------------------------------------|--|--|--|------------------|--|
| 1 | randomised trials | not serious | not serious <sup>a</sup> | not serious | serious <sup>c</sup> | none | NCT02528214 (Rabe 2018) reported a least square MD of 0.22 (0.09 to 0.34) L favouring 24 weeks of treatment with dupilumab (dupilumab 0.22 (0.05) versus placebo 0.01 (0.05)). |  |  |  | ⊕⊕⊕○<br>MODERATE |  |
|---|-------------------|-------------|--------------------------|-------------|----------------------|------|--------------------------------------------------------------------------------------------------------------------------------------------------------------------------------|--|--|--|------------------|--|

### SYSTEMIC STEROIDS USE (patients with ≥50% reduction in oral glucocorticoid dose at 24 w)

|   |                   |             |                          |             |             |      |                |                |                           |                                              |              |  |
|---|-------------------|-------------|--------------------------|-------------|-------------|------|----------------|----------------|---------------------------|----------------------------------------------|--------------|--|
| 1 | randomised trials | not serious | not serious <sup>a</sup> | not serious | not serious | none | 82/103 (79.6%) | 57/107 (53.3%) | RR 1.49<br>(1.22 to 1.83) | 26 more per 100<br>(from 12 more to 44 more) | ⊕⊕⊕⊕<br>HIGH |  |
|---|-------------------|-------------|--------------------------|-------------|-------------|------|----------------|----------------|---------------------------|----------------------------------------------|--------------|--|

### SYSTEMIC STEROIDS USE (patients with oral glucocorticoid reduced to <5 mg/day at 24 w)

|   |                   |             |                          |             |             |      |                |                |                           |                                                   |              |  |
|---|-------------------|-------------|--------------------------|-------------|-------------|------|----------------|----------------|---------------------------|---------------------------------------------------|--------------|--|
| 1 | randomised trials | not serious | not serious <sup>a</sup> | not serious | not serious | none | 74/103 (71.8%) | 40/107 (37.4%) | RR 1.92<br>(1.46 to 2.53) | 344 more per 1.000<br>(from 172 more to 572 more) | ⊕⊕⊕⊕<br>HIGH |  |
|---|-------------------|-------------|--------------------------|-------------|-------------|------|----------------|----------------|---------------------------|---------------------------------------------------|--------------|--|

| Certainty assessment |              |              |               |              |             |                      | № of patients                     |         | Effect            |                   | Certainty | Importance |
|----------------------|--------------|--------------|---------------|--------------|-------------|----------------------|-----------------------------------|---------|-------------------|-------------------|-----------|------------|
| № of studies         | Study design | Risk of bias | Inconsistency | Indirectness | Imprecision | Other considerations | 300 mg of dupilumab every 2 weeks | placebo | Relative (95% CI) | Absolute (95% CI) |           |            |

**SYSTEMIC STEROIDS USE (patients with maximum possible reduction of oral glucocorticoid dose at 24 w)**

|   |                   |             |                          |             |             |      |                |                |                                  |                                                         |              |  |
|---|-------------------|-------------|--------------------------|-------------|-------------|------|----------------|----------------|----------------------------------|---------------------------------------------------------|--------------|--|
| 1 | randomised trials | not serious | not serious <sup>a</sup> | not serious | not serious | none | 54/103 (52.4%) | 32/107 (29.9%) | <b>RR 1.75</b><br>(1.24 to 2.47) | <b>224 more per 1.000</b><br>(from 72 more to 440 more) | ⊕⊕⊕⊕<br>HIGH |  |
|---|-------------------|-------------|--------------------------|-------------|-------------|------|----------------|----------------|----------------------------------|---------------------------------------------------------|--------------|--|

**SYSTEMIC STEROIDS USE (patients no longer requiring oral glucocorticoid at 24 w)**

|   |                   |             |                          |             |             |      |                |                |                                  |                                                         |              |  |
|---|-------------------|-------------|--------------------------|-------------|-------------|------|----------------|----------------|----------------------------------|---------------------------------------------------------|--------------|--|
| 1 | randomised trials | not serious | not serious <sup>a</sup> | not serious | not serious | none | 54/103 (52.4%) | 31/107 (29.0%) | <b>RR 1.81</b><br>(1.28 to 2.57) | <b>235 more per 1.000</b><br>(from 81 more to 455 more) | ⊕⊕⊕⊕<br>HIGH |  |
|---|-------------------|-------------|--------------------------|-------------|-------------|------|----------------|----------------|----------------------------------|---------------------------------------------------------|--------------|--|

**SIDE EFFECTS (assessed with: any side effect (dupilumab during 24 weeks))**

|   |                   |             |                          |             |                      |      |                |                |                                  |                                                      |                  |  |
|---|-------------------|-------------|--------------------------|-------------|----------------------|------|----------------|----------------|----------------------------------|------------------------------------------------------|------------------|--|
| 1 | randomised trials | not serious | not serious <sup>a</sup> | not serious | serious <sup>d</sup> | none | 64/103 (62.1%) | 69/107 (64.5%) | <b>RR 0.96</b><br>(0.78 to 1.18) | <b>3 fewer per 100</b><br>(from 14 fewer to 12 more) | ⊕⊕⊕○<br>MODERATE |  |
|---|-------------------|-------------|--------------------------|-------------|----------------------|------|----------------|----------------|----------------------------------|------------------------------------------------------|------------------|--|

**SIDE EFFECTS (assessed with: any serious side effect (dupilumab during 24 weeks))**

|   |                   |             |                          |             |                      |      |              |              |                                  |                                                    |                  |  |
|---|-------------------|-------------|--------------------------|-------------|----------------------|------|--------------|--------------|----------------------------------|----------------------------------------------------|------------------|--|
| 1 | randomised trials | not serious | not serious <sup>a</sup> | not serious | serious <sup>d</sup> | none | 9/103 (8.7%) | 6/107 (5.6%) | <b>RR 1.56</b><br>(0.58 to 4.22) | <b>3 more per 100</b><br>(from 2 fewer to 18 more) | ⊕⊕⊕○<br>MODERATE |  |
|---|-------------------|-------------|--------------------------|-------------|----------------------|------|--------------|--------------|----------------------------------|----------------------------------------------------|------------------|--|

**SIDE EFFECTS (assessed with: injection site reactions (dupilumab during 24 weeks))**

|   |                   |             |                          |             |                      |      |              |              |                                  |                                                    |                  |  |
|---|-------------------|-------------|--------------------------|-------------|----------------------|------|--------------|--------------|----------------------------------|----------------------------------------------------|------------------|--|
| 1 | randomised trials | not serious | not serious <sup>a</sup> | not serious | serious <sup>d</sup> | none | 9/103 (8.7%) | 4/107 (3.7%) | <b>RR 2.34</b><br>(0.74 to 7.35) | <b>5 more per 100</b><br>(from 1 fewer to 24 more) | ⊕⊕⊕○<br>MODERATE |  |
|---|-------------------|-------------|--------------------------|-------------|----------------------|------|--------------|--------------|----------------------------------|----------------------------------------------------|------------------|--|

**CI:** Confidence interval; **RR:** Risk ratio

**Explanations**

a. not applicable (findings from 1 trial)

b. minimal important difference for ACQ-5 is 0.5; lower values indicate better asthma control.

- c. minimal important difference for FEV1 is 0.23.
- d. low event rate, resulting in imprecise effect estimate

**Evidence Profile:** 200 mg of dupilumab every 2 weeks compared to placebo for patients with severe asthma according to blood eosinophils

| Certainty assessment |              |              |               |              |             |                      | Nº of patients                    |         | Effect            |                   | Certainty | Importance |
|----------------------|--------------|--------------|---------------|--------------|-------------|----------------------|-----------------------------------|---------|-------------------|-------------------|-----------|------------|
| Nº of studies        | Study design | Risk of bias | Inconsistency | Indirectness | Imprecision | Other considerations | 200 mg of dupilumab every 2 weeks | placebo | Relative (95% CI) | Absolute (95% CI) |           |            |

**EXACERBATION - annualised severe exacerbation event rate at week 24 (according to blood eosinophil 300 cells/mm3 or more)**

|                |                   |             |                          |             |             |      |      |      |                                   |                                                                            |              |  |
|----------------|-------------------|-------------|--------------------------|-------------|-------------|------|------|------|-----------------------------------|----------------------------------------------------------------------------|--------------|--|
| 1 <sup>1</sup> | randomised trials | not serious | not serious <sup>a</sup> | not serious | not serious | none | 0/65 | 0/68 | Rate ratio 0.29<br>(0.11 to 0.76) | 74 less severe exacerbations per 100 patients per year<br>(from 44 to 122) | ⊕⊕⊕⊕<br>HIGH |  |
|----------------|-------------------|-------------|--------------------------|-------------|-------------|------|------|------|-----------------------------------|----------------------------------------------------------------------------|--------------|--|

**EXACERBATION - annualised severe exacerbation event rate at week 24 (according to blood eosinophil <300 cells/mm3)**

|                |                   |             |                          |             |             |      |      |      |                                   |                                                                           |              |  |
|----------------|-------------------|-------------|--------------------------|-------------|-------------|------|------|------|-----------------------------------|---------------------------------------------------------------------------|--------------|--|
| 1 <sup>1</sup> | randomised trials | not serious | not serious <sup>a</sup> | not serious | not serious | none | 0/85 | 0/90 | Rate ratio 0.32<br>(0.14 to 0.74) | 53 less severe exacerbations per 100 patients per year<br>(from 37 to 71) | ⊕⊕⊕⊕<br>HIGH |  |
|----------------|-------------------|-------------|--------------------------|-------------|-------------|------|------|------|-----------------------------------|---------------------------------------------------------------------------|--------------|--|

**LUNG FUNCTION - change in FEV1 from baseline at week 24 (according to blood eosinophil 300 cells/mm3 or more) (assessed with: Liters)**

|                |                   |                      |                          |             |                      |      |    |    |   |                                                           |             |  |
|----------------|-------------------|----------------------|--------------------------|-------------|----------------------|------|----|----|---|-----------------------------------------------------------|-------------|--|
| 1 <sup>1</sup> | randomised trials | serious <sup>b</sup> | not serious <sup>a</sup> | not serious | serious <sup>c</sup> | none | 59 | 52 | - | least square 0.16 Liters more<br>(0.02 more to 0.31 more) | ⊕⊕○○<br>LOW |  |
|----------------|-------------------|----------------------|--------------------------|-------------|----------------------|------|----|----|---|-----------------------------------------------------------|-------------|--|

**LUNG FUNCTION - change in FEV1 from baseline at week 24 (according to blood eosinophil <300 cells/mm3) (assessed with: Liters)**

|                |                   |                      |                          |             |                      |      |    |    |   |                                                           |             |  |
|----------------|-------------------|----------------------|--------------------------|-------------|----------------------|------|----|----|---|-----------------------------------------------------------|-------------|--|
| 1 <sup>1</sup> | randomised trials | serious <sup>b</sup> | not serious <sup>a</sup> | not serious | serious <sup>c</sup> | none | 76 | 73 | - | least square 0.14 Liters more<br>(0.03 more to 0.25 more) | ⊕⊕○○<br>LOW |  |
|----------------|-------------------|----------------------|--------------------------|-------------|----------------------|------|----|----|---|-----------------------------------------------------------|-------------|--|

**LUNG FUNCTION - change in FEV1 from baseline at week 24 (according to blood eosinophil 300 cells/mm3 or more) (assessed with: % of change; Scale from: 0 to 100)**

|                |                   |                      |                          |             |                      |      |    |    |   |                                                                       |             |  |
|----------------|-------------------|----------------------|--------------------------|-------------|----------------------|------|----|----|---|-----------------------------------------------------------------------|-------------|--|
| 1 <sup>1</sup> | randomised trials | serious <sup>b</sup> | not serious <sup>a</sup> | not serious | serious <sup>d</sup> | none | 59 | 52 | - | least square 10.07 percentage points more<br>(1.23 more to 18.9 more) | ⊕⊕○○<br>LOW |  |
|----------------|-------------------|----------------------|--------------------------|-------------|----------------------|------|----|----|---|-----------------------------------------------------------------------|-------------|--|

**LUNG FUNCTION - change in FEV1 from baseline at week 24 (according to blood eosinophil <300 cells/mm3) (assessed with: % of change; Scale from: 0 to 100)**

| Certainty assessment |                   |                      |                          |              |                      |                      | № of patients                     |         | Effect            |                                                                             | Certainty   | Importance |
|----------------------|-------------------|----------------------|--------------------------|--------------|----------------------|----------------------|-----------------------------------|---------|-------------------|-----------------------------------------------------------------------------|-------------|------------|
| № of studies         | Study design      | Risk of bias         | Inconsistency            | Indirectness | Imprecision          | Other considerations | 200 mg of dupilumab every 2 weeks | placebo | Relative (95% CI) | Absolute (95% CI)                                                           |             |            |
| 1 <sup>1</sup>       | randomised trials | serious <sup>b</sup> | not serious <sup>a</sup> | not serious  | serious <sup>d</sup> | none                 | 76                                | 73      | -                 | least square <b>8.75 percentage points more</b><br>(2.7 more to 14.81 more) | ⊕⊕○○<br>LOW |            |

ASTHMA CONTROL - at week 24 according to blood eosinophil 300 cells/mm3 or more (assessed with: ACQ-5; Scale from: 0 to 6)<sup>e</sup>

|                |                   |                      |                          |             |                      |      |    |    |   |                                                                             |             |  |
|----------------|-------------------|----------------------|--------------------------|-------------|----------------------|------|----|----|---|-----------------------------------------------------------------------------|-------------|--|
| 1 <sup>1</sup> | randomised trials | serious <sup>b</sup> | not serious <sup>a</sup> | not serious | serious <sup>c</sup> | none | 59 | 52 | - | least square MD <b>0.42 ACQ-5 units lower</b><br>(0.76 lower to 0.07 lower) | ⊕⊕○○<br>LOW |  |
|----------------|-------------------|----------------------|--------------------------|-------------|----------------------|------|----|----|---|-----------------------------------------------------------------------------|-------------|--|

ASTHMA CONTROL - at week 24 according to blood eosinophil <300 cells/mm3 (assessed with: ACQ-5; Scale from: 0 to 6)<sup>e</sup>

|                |                   |                      |                          |             |                      |      |    |    |   |                                                                             |             |  |
|----------------|-------------------|----------------------|--------------------------|-------------|----------------------|------|----|----|---|-----------------------------------------------------------------------------|-------------|--|
| 1 <sup>1</sup> | randomised trials | serious <sup>b</sup> | not serious <sup>a</sup> | not serious | serious <sup>c</sup> | none | 75 | 75 | - | least square MD <b>0.33 ACQ-5 units lower</b><br>(0.61 lower to 0.05 lower) | ⊕⊕○○<br>LOW |  |
|----------------|-------------------|----------------------|--------------------------|-------------|----------------------|------|----|----|---|-----------------------------------------------------------------------------|-------------|--|

QUALITY OF LIFE - at week 24 according to blood eosinophil 300 cells/mm3 or more (assessed with: AQLQ ; Scale from: 0 to 7)<sup>f</sup>

|                |                   |                      |                          |             |                      |      |    |    |   |                                                                               |             |  |
|----------------|-------------------|----------------------|--------------------------|-------------|----------------------|------|----|----|---|-------------------------------------------------------------------------------|-------------|--|
| 1 <sup>1</sup> | randomised trials | serious <sup>b</sup> | not serious <sup>a</sup> | not serious | serious <sup>c</sup> | none | 58 | 53 | - | least square MD <b>0.67 AQLQ units higher</b><br>(0.31 higher to 1.03 higher) | ⊕⊕○○<br>LOW |  |
|----------------|-------------------|----------------------|--------------------------|-------------|----------------------|------|----|----|---|-------------------------------------------------------------------------------|-------------|--|

QUALITY OF LIFE - at week 24 according to blood eosinophil <300 cells/mm3 (assessed with: AQLQ; Scale from: 0 to 7)<sup>f</sup>

|                |                   |                      |                          |             |             |      |    |    |   |                                                                              |                  |  |
|----------------|-------------------|----------------------|--------------------------|-------------|-------------|------|----|----|---|------------------------------------------------------------------------------|------------------|--|
| 1 <sup>1</sup> | randomised trials | serious <sup>b</sup> | not serious <sup>a</sup> | not serious | not serious | none | 74 | 74 | - | least square MD <b>0.05 AQLQ units higher</b><br>(0.26 lower to 0.36 higher) | ⊕⊕⊕○<br>MODERATE |  |
|----------------|-------------------|----------------------|--------------------------|-------------|-------------|------|----|----|---|------------------------------------------------------------------------------|------------------|--|

CI: Confidence interval

#### Explanations

a. not applicable (findings from 1 trial)

b. Relevant and differential attrition bias in NCT01854047 (Wenzel 2016) for placebo and dupilumab groups (more than 20% and around 10% respectively)

- c. the lower CI boundary crosses the threshold for minimal important difference
- d. Minimal important differences not known for FEV1 % of change, however the 95CI is wide and does not exclude important benefit or no effect.
- e. minimal important difference for ACQ-5 is 0.5; lower values indicate better asthma control.
- f. minimal important difference for AQLQ is 0.5; higher scores indicates better QoL.

## References

1. Wenzel S, Castro M, Corren J, Maspero J, Wang L, Zhang B, Pirozzi G, Sutherland ER, Evans RR, Joish VN, Eckert L, Graham NM, Stahl N, Yancopoulos GD, Louis-Tisserand M, Teper A.. Dupilumab efficacy and safety in adults with uncontrolled persistent asthma despite use of medium-to-high-dose inhaled corticosteroids plus a long-acting  $\beta$ 2 agonist: a randomised double-blind placebo-controlled pivotal phase 2b dose-ranging trial. *Lancet*; 2016.



Evidence to Decision Framework:DUPIUMAB

| Should an anti-interleukin 4/13 strategy be used for adults and children with severe asthma? |                                                                                                                             |                                                                                                                                                                                                                                                                                                                                                                                                                                                                                                                                                                                                                                                                                                                                                                                                                                                                                                                                                                                                                                                                                                                                       |
|----------------------------------------------------------------------------------------------|-----------------------------------------------------------------------------------------------------------------------------|---------------------------------------------------------------------------------------------------------------------------------------------------------------------------------------------------------------------------------------------------------------------------------------------------------------------------------------------------------------------------------------------------------------------------------------------------------------------------------------------------------------------------------------------------------------------------------------------------------------------------------------------------------------------------------------------------------------------------------------------------------------------------------------------------------------------------------------------------------------------------------------------------------------------------------------------------------------------------------------------------------------------------------------------------------------------------------------------------------------------------------------|
| POPULATION:                                                                                  | Adults and children with severe asthma                                                                                      | <b>BACKGROUND:</b><br><br>Approximately half of patients with asthma exhibit elevated markers of type 2 inflammation. Two of the cytokines that orchestrate this type of inflammation are interleukins (IL) 4 and 13, each of which independently elicits pathobiologic changes in airway structural and immune cells characteristic of asthma. IL4 is required for the skewing of T helper cells into Th2 cells, and for the switching of B cell antibody production into the IgE isotype crucial for allergic inflammation. IL13 is a prime inducer of airway hyperresponsiveness and is implicated in airway remodeling. Both cytokines engage and signal through the interleukin 4 receptor subunit alpha.<br><br>A monoclonal antibody that targets the interleukin 4 receptor subunit alpha, dupilumab, has been found to be efficacious in randomized controlled trials to improve asthma-related outcomes. This systematic review and meta-analysis synthesizes the data from three randomized controlled trials that have investigated the anti-IL4/13 strategy and provides treatment recommendations based on the results. |
| INTERVENTION:                                                                                | Anti-interleukin 4/13 strategy (dupilumab, a monoclonal antibody directed against the interleukin 4 receptor subunit alpha) |                                                                                                                                                                                                                                                                                                                                                                                                                                                                                                                                                                                                                                                                                                                                                                                                                                                                                                                                                                                                                                                                                                                                       |
| COMPARISON:                                                                                  | No anti-interleukin 4/13                                                                                                    |                                                                                                                                                                                                                                                                                                                                                                                                                                                                                                                                                                                                                                                                                                                                                                                                                                                                                                                                                                                                                                                                                                                                       |
| MAIN OUTCOMES:                                                                               | Rate of exacerbations                                                                                                       |                                                                                                                                                                                                                                                                                                                                                                                                                                                                                                                                                                                                                                                                                                                                                                                                                                                                                                                                                                                                                                                                                                                                       |
|                                                                                              | Time to first asthma exacerbation                                                                                           |                                                                                                                                                                                                                                                                                                                                                                                                                                                                                                                                                                                                                                                                                                                                                                                                                                                                                                                                                                                                                                                                                                                                       |
|                                                                                              | Asthma exacerbations requiring ER visits or hospitalization                                                                 |                                                                                                                                                                                                                                                                                                                                                                                                                                                                                                                                                                                                                                                                                                                                                                                                                                                                                                                                                                                                                                                                                                                                       |
|                                                                                              | Lung function                                                                                                               |                                                                                                                                                                                                                                                                                                                                                                                                                                                                                                                                                                                                                                                                                                                                                                                                                                                                                                                                                                                                                                                                                                                                       |
|                                                                                              | Asthma control                                                                                                              |                                                                                                                                                                                                                                                                                                                                                                                                                                                                                                                                                                                                                                                                                                                                                                                                                                                                                                                                                                                                                                                                                                                                       |
|                                                                                              | Maintenance corticosteroid dose reduction                                                                                   |                                                                                                                                                                                                                                                                                                                                                                                                                                                                                                                                                                                                                                                                                                                                                                                                                                                                                                                                                                                                                                                                                                                                       |
|                                                                                              | Adverse events                                                                                                              |                                                                                                                                                                                                                                                                                                                                                                                                                                                                                                                                                                                                                                                                                                                                                                                                                                                                                                                                                                                                                                                                                                                                       |
|                                                                                              | Serious adverse events                                                                                                      |                                                                                                                                                                                                                                                                                                                                                                                                                                                                                                                                                                                                                                                                                                                                                                                                                                                                                                                                                                                                                                                                                                                                       |
|                                                                                              | Quality of life                                                                                                             |                                                                                                                                                                                                                                                                                                                                                                                                                                                                                                                                                                                                                                                                                                                                                                                                                                                                                                                                                                                                                                                                                                                                       |

## Assessment

|                   | JUDGEMENT                                                                                                                                                                                                                      | RESEARCH EVIDENCE                                                                                                                                                                                                                                                                                                                                                                                                                                                                                                                                                                                                                                                                                                                                                                                                                                                                                                                                                                                                                                                                                                                                                                                                                                                                                                                                                                                                                                                                                                                                                                                                                                                                                                                                                                                                                                                                                                                                                                                 | ADDITIONAL CONSIDERATIONS                                                                                                                                                                                                                                                                                                                                                                                                                                                                                                                                                                                                                                                                                                                                                                                                                                                                                                                                                                                                                                                                                                                                                                                                                                                                                                                                                                                                          |
|-------------------|--------------------------------------------------------------------------------------------------------------------------------------------------------------------------------------------------------------------------------|---------------------------------------------------------------------------------------------------------------------------------------------------------------------------------------------------------------------------------------------------------------------------------------------------------------------------------------------------------------------------------------------------------------------------------------------------------------------------------------------------------------------------------------------------------------------------------------------------------------------------------------------------------------------------------------------------------------------------------------------------------------------------------------------------------------------------------------------------------------------------------------------------------------------------------------------------------------------------------------------------------------------------------------------------------------------------------------------------------------------------------------------------------------------------------------------------------------------------------------------------------------------------------------------------------------------------------------------------------------------------------------------------------------------------------------------------------------------------------------------------------------------------------------------------------------------------------------------------------------------------------------------------------------------------------------------------------------------------------------------------------------------------------------------------------------------------------------------------------------------------------------------------------------------------------------------------------------------------------------------------|------------------------------------------------------------------------------------------------------------------------------------------------------------------------------------------------------------------------------------------------------------------------------------------------------------------------------------------------------------------------------------------------------------------------------------------------------------------------------------------------------------------------------------------------------------------------------------------------------------------------------------------------------------------------------------------------------------------------------------------------------------------------------------------------------------------------------------------------------------------------------------------------------------------------------------------------------------------------------------------------------------------------------------------------------------------------------------------------------------------------------------------------------------------------------------------------------------------------------------------------------------------------------------------------------------------------------------------------------------------------------------------------------------------------------------|
| DESIRABLE EFFECTS | <p><b>How substantial are the desirable anticipated effects?</b></p> <ul style="list-style-type: none"> <li>○ Trivial</li> <li>○ Small</li> <li>○ Moderate</li> <li>● Large</li> <li>○ Varies</li> <li>○ Don't know</li> </ul> | <p>Asthma exacerbations are a critically important outcome for the patients with asthma who experience these and the clinicians who care for them.</p> <p>Relative to participants assigned to placebo, those assigned to dupilumab experienced substantial (46-70.5%) reduction in their rates of asthma exacerbations (PMID: 29782224, PMID: 29782217, PMID: 27130691) (insert evidence tables for the two doses and time intervals).</p> <p>One RCT evaluated the effects of dupilumab therapy in oral corticosteroid (OCS) dependent asthma (Rabe 2018. PMID: 29782224). Dupilumab therapy was associated with greater number of participants that experienced <math>\geq 50\%</math> reduction in OCS dose (RR 1.49; 95% CI 1.22-1.83), were able to reduce OCS dose to <math>&lt; 5\text{mg/d}</math> (RR 1.92; 95% CI 1.46-2.53) and were able to discontinue maintenance OCS (RR 1.81; 95% CI 1.28-2.57).</p> <p>Asthma symptom scores are another critically important outcome in asthma studies. Although the evidence favors dupilumab relative to placebo on these outcomes, their relative change was not as large compared to the improvement observed with asthma exacerbations. Relative to participants assigned to placebo, those assigned to dupilumab experienced a 0.22-0.47 point decrease (i.e. improvement) in Asthma Control Questionnaire (ACQ) (insert evidence table). Although statistically significant, these decreases in ACQ-5 scores did not surpass the 0.5-point MCID for the ACQ symptom score for trials in asthma.</p> <p>Similarly, although the improvements in lung function (FEV1) were statistically significant (see evidence tables), they were small and did not cross the MCID threshold of 0.23 L.</p> <p>Efficacy is similar between doses. The effect size for all above outcomes was larger in subgroup of patients with higher blood eosinophil count.</p> <p>Meta-analytical results on other outcomes appear in the online supplement.</p> | <p>Although a defined threshold for clinically meaningful reductions in asthma exacerbations has not been universally agreed upon, the effect sizes in reductions in asthma exacerbations for this drug would be considered clinically substantial by most practitioners.</p> <p>The decision to consider changes in lung function [forced expiratory volume in the first second (FEV1)] as 'important' outcomes as opposed to 'critical' outcomes is due to their place relative to other critical outcomes. We understand that most clinicians would prescribe dupilumab due to its efficacy in reducing asthma exacerbations despite only modest improvements in lung function. Results from our meta-analysis on the modest effect on lung function relative to the effect on asthma exacerbations led us to downgrade the importance of lung function to an important outcome, as suggested by the methodological approach endorsed by Guyatt et al (PMID: 21194891)</p> <p>Taken together, the reduction in asthma exacerbations is substantial enough for this committee to judge the desirable effects of an anti-IL4/13 strategy as large, regardless of relatively smaller effects on symptom scores and lung function.</p> <p>Dupilumab is currently FDA approved in patients <math>\geq 12</math> years of age with moderate to severe eosinophilic asthma or those with systemic corticosteroid dependent asthma.</p> |

|                            |                                                                                                                                                                                                                                  |                                                                                                                                                                                                                                                                                                                                                                                                                                                                                                                     |                                                                                                                                                                                                                                                                                                                                                                                                                                                                                                                                                                                                                                                                                                                                                                                                                           |
|----------------------------|----------------------------------------------------------------------------------------------------------------------------------------------------------------------------------------------------------------------------------|---------------------------------------------------------------------------------------------------------------------------------------------------------------------------------------------------------------------------------------------------------------------------------------------------------------------------------------------------------------------------------------------------------------------------------------------------------------------------------------------------------------------|---------------------------------------------------------------------------------------------------------------------------------------------------------------------------------------------------------------------------------------------------------------------------------------------------------------------------------------------------------------------------------------------------------------------------------------------------------------------------------------------------------------------------------------------------------------------------------------------------------------------------------------------------------------------------------------------------------------------------------------------------------------------------------------------------------------------------|
|                            |                                                                                                                                                                                                                                  |                                                                                                                                                                                                                                                                                                                                                                                                                                                                                                                     | <p>Dupilumab is available in two doses for indication of asthma: 200 mg every 2 weeks after a loading dose of 400 mg; 300 mg every 2 weeks after a loading dose of 600 mg. This panel agrees with FDA recommendation to consider the higher dose for patients with OCS dependent asthma or comorbid atopic dermatitis.</p> <p>FDA notes that “the adolescent subgroup demonstrated a statistically significant improvement in lung function for both dose groups; however, the exacerbation benefit was not clearly demonstrated for either dose group. This review recommends approval in this age group, as there are no age-related differences in the pharmacokinetic and pharmacodynamic parameters, and no safety concerns for dupilumab in adolescent patients.”</p>                                               |
| <p>UNDESIRABLE EFFECTS</p> | <p><b>How substantial are the undesirable anticipated effects?</b></p> <ul style="list-style-type: none"> <li>○ Large</li> <li>○ Moderate</li> <li>● Small</li> <li>○ Trivial</li> <li>○ Varies</li> <li>○ Don't know</li> </ul> | <p>In the RCTs analysed, the relative risk of a study participant developing an adverse event was 0.96-1.08 for those participants assigned to dupilumab compared to placebo. Similarly, the relative risk of participant developing a serious adverse event when assigned to dupilumab vs. placebo was 0.93-1.56. (insert evidence tables).</p> <p>Relative risk for injection site reactions varied from 1.47 (95% CI 0.88-2.47; 200 mg dose at 24 weeks) to 2.34 (95% CI 0.74-7.35; 300 mg dose at 24 weeks)</p> | <p>Dupilumab has been well tolerated, receiving its first FDA approval for atopic dermatitis in 2017 followed by its approval for asthma in 2018.</p> <p>Treatment related eosinophilia that met criteria for adverse event was observed in 4.1% of participants assigned to dupilumab vs. 0.6% in those assigned to placebo (PMID: 29782217). Associated symptoms of eosinophilia were noted in 0.2% of the total trial population in this study. Similarly, in another study of patients with corticosteroid-dependent asthma (PMID: 29782224), treatment related eosinophilia AE was observed in 13% of participants as compared to 1% of participants assigned to placebo. Long term follow-up for this and other side effects is unavailable. Monitoring for eosinophilia is not mandated in the package insert.</p> |

|                       |                                                                                                                                                                                                                                                                                                                                                                                                                         |                                                                                                                                                                                                                                               |                                                                                                                                                                                                                                                                                                                                                                                                                                                                                                                                                                                                                                                                                                                                                 |
|-----------------------|-------------------------------------------------------------------------------------------------------------------------------------------------------------------------------------------------------------------------------------------------------------------------------------------------------------------------------------------------------------------------------------------------------------------------|-----------------------------------------------------------------------------------------------------------------------------------------------------------------------------------------------------------------------------------------------|-------------------------------------------------------------------------------------------------------------------------------------------------------------------------------------------------------------------------------------------------------------------------------------------------------------------------------------------------------------------------------------------------------------------------------------------------------------------------------------------------------------------------------------------------------------------------------------------------------------------------------------------------------------------------------------------------------------------------------------------------|
|                       |                                                                                                                                                                                                                                                                                                                                                                                                                         |                                                                                                                                                                                                                                               | <p>Injection site reactions were the most common side effects and were dose-related.</p> <p>The ocular side effects seen in studies of dupilumab in atopic dermatitis were not observed in asthma trials.</p>                                                                                                                                                                                                                                                                                                                                                                                                                                                                                                                                   |
| CERTAINTY OF EVIDENCE | <p><b>What is the overall certainty of the evidence of effects?</b></p> <ul style="list-style-type: none"> <li>○ Very low</li> <li>○ Low</li> <li>● Moderate</li> <li>○ High</li> <li>○ No included studies</li> </ul>                                                                                                                                                                                                  | <p>Overall population (patients with moderate and severe persistent asthma): low quality of evidence;</p> <p>Population that meets criteria for the diagnosis of severe asthma defined by the ERS/ATS Guidelines: low quality of evidence</p> | <p>Our certainty assessment relies on study design (randomized controlled trials), risk of bias (not serious), inconsistency (not serious), indirectness (not serious), and imprecision (not serious).</p> <p>Further the certainty is based on the quality of evidence that is lowest among critical outcomes.</p>                                                                                                                                                                                                                                                                                                                                                                                                                             |
| VALUES                | <p><b>Is there important uncertainty about or variability in how much people value the main outcomes?</b></p> <ul style="list-style-type: none"> <li>○ Important uncertainty or variability</li> <li>○ Possibly important uncertainty or variability</li> <li>○ Probably no important uncertainty or variability</li> <li>● No important uncertainty or variability</li> <li>○ No known undesirable outcomes</li> </ul> | <p>No evidence identified</p>                                                                                                                                                                                                                 | <p>There is no important uncertainty about how patients and the clinicians who care for them assess asthma exacerbations. On the other hand, asthma exacerbations are not the only critical outcome for patients and clinicians, who also consider the effect of interventions on other outcomes, such as changes in lung function, change in maintenance dose of systemic corticosteroids, asthma symptoms, and quality of life. Although the effect size of anti-IL4/13 strategy drug is not uniform across these other outcomes, these drugs tended to improve to varying degrees all asthma related outcomes. Further, patients and clinicians rarely decide to prescribe these drugs based on only one of these outcomes in isolation.</p> |

|                                             |                                                                                                                                                                                                                                                                                                                                                                                                                                   |                                                                                                                                                                                                                                                                                                                                       |                                                                                                                                                                                                                                                                                                     |
|---------------------------------------------|-----------------------------------------------------------------------------------------------------------------------------------------------------------------------------------------------------------------------------------------------------------------------------------------------------------------------------------------------------------------------------------------------------------------------------------|---------------------------------------------------------------------------------------------------------------------------------------------------------------------------------------------------------------------------------------------------------------------------------------------------------------------------------------|-----------------------------------------------------------------------------------------------------------------------------------------------------------------------------------------------------------------------------------------------------------------------------------------------------|
|                                             |                                                                                                                                                                                                                                                                                                                                                                                                                                   |                                                                                                                                                                                                                                                                                                                                       | Further, many pharmacy formularies for physician groups and hospitals restrict these drugs to patients with severe asthma and a recent history of asthma exacerbations. The decision whether or not to prescribe these drugs is likely to be important in this population.                          |
| BALANCE OF EFFECTS                          | <p><b>Does the balance between desirable and undesirable effects favor the intervention or the comparison?</b></p> <ul style="list-style-type: none"> <li>○ Favors the comparison</li> <li>○ Probably favors the comparison</li> <li>○ Does not favor either the intervention or the comparison</li> <li>○ Probably favors the intervention</li> <li>● Favors the intervention</li> <li>○ Varies</li> <li>○ Don't know</li> </ul> | Dupilumab therapy was associated with large desirable and small undesirable effects.                                                                                                                                                                                                                                                  | Dupilumab was well tolerated in the clinical trials. Frequency of both serious and non-serious side effects were similar in placebo and intervention groups. Thus, considering the substantial benefit in terms of reducing asthma exacerbations, the balance favors using an anti-IL4/13 strategy. |
| AYBCOST EFFECTIVENESS                       | <p><b>Does the cost-effectiveness of the intervention favor the intervention or the comparison?</b></p> <ul style="list-style-type: none"> <li>● Favors the comparison</li> <li>○ Probably favors the comparison</li> <li>○ Does not favor either the intervention or the comparison</li> <li>○ Probably favors the intervention</li> <li>○ Favors the intervention</li> <li>○ Varies</li> <li>○ No included studies</li> </ul>   | The December 2018 report by the Institute for Clinical and Economic Review (ICER) states that dupilumab costs >\$400,000 per quality-adjusted life years (QALY) gained when compared to standard of care (ICER 2018). These figures far exceed the accepted threshold for a cost-effective intervention of \$150,000 per QALY gained. | Therefore, the alternative is favored over an anti-IL4/13 strategy from a cost-effectiveness standpoint.                                                                                                                                                                                            |
| CERTAINTY OF EVIDENCE OF REQUIRED RESOURCES | <p><b>What is the certainty of the evidence of resource requirements (costs)?</b></p> <ul style="list-style-type: none"> <li>○ Very low</li> <li>○ Low</li> <li>○ Moderate</li> <li>● High</li> <li>○ No included studies</li> </ul>                                                                                                                                                                                              | The manufacturers' listed annual net price for dupilumab is \$36,000 (ICER 2018). The certainty of these costs is therefore high.                                                                                                                                                                                                     |                                                                                                                                                                                                                                                                                                     |

|               |                                                                                                                                                                                                                                                                           |                         |                                                                                                                                                                                                                                                                                                                                                                                                                                                                                                                                                                                                                                                                                                                                                                                                                                                                                                                                                                                                                       |
|---------------|---------------------------------------------------------------------------------------------------------------------------------------------------------------------------------------------------------------------------------------------------------------------------|-------------------------|-----------------------------------------------------------------------------------------------------------------------------------------------------------------------------------------------------------------------------------------------------------------------------------------------------------------------------------------------------------------------------------------------------------------------------------------------------------------------------------------------------------------------------------------------------------------------------------------------------------------------------------------------------------------------------------------------------------------------------------------------------------------------------------------------------------------------------------------------------------------------------------------------------------------------------------------------------------------------------------------------------------------------|
| EQUITY        | <p><b>What would be the impact on health equity?</b></p> <ul style="list-style-type: none"> <li>○ Reduced</li> <li>● Probably reduced</li> <li>○ Probably no impact</li> <li>○ Probably increased</li> <li>○ Increased</li> <li>○ Varies</li> <li>○ Don't know</li> </ul> | No evidence identified. | <p>In the US, racial and ethnic minorities, and individuals of lower socioeconomic status have been documented to have less access to specialty clinics and are less likely to use controller therapy for asthma. Since dupilumab is mainly prescribed by specialists it is likely that racial and ethnic minorities will be less likely to be prescribed one of these drugs. Other groups may thus experience greater reductions in asthma exacerbations due to access to these drugs, which will thus reduce health equity. Similarly, patients with severe asthma who live in regions with fewer specialists will be less likely to receive these drugs, thus reducing equity between areas with high and low access to specialty care.</p> <p>On the other hand, the manufacturers of these drugs have programs in place to reduce patients' out of pocket costs for these drugs, which may partly mitigate the decrease in equity posed by differences in access by socioeconomic status and race/ethnicity.</p> |
| ACCEPTABILITY | <p><b>Is the intervention acceptable to key stakeholders?</b></p> <ul style="list-style-type: none"> <li>○ No</li> <li>○ Probably no</li> <li>○ Probably yes</li> <li>○ Yes</li> <li>● Varies</li> <li>○ Don't know</li> </ul>                                            | No evidence identified. | <p>Most patients with severe asthma welcome the possibility of relief from asthma through dupilumab, as long as the potential benefit is not offset by adverse effects, costs or other inconveniences (travel or prolonged waiting times in clinic, etc.).</p> <p>Health insurance companies and clinic administrations find anti-IL4/13 strategy drugs less acceptable due to their high cost.</p>                                                                                                                                                                                                                                                                                                                                                                                                                                                                                                                                                                                                                   |
| FEASIBILITY   | <p><b>Is the intervention feasible to implement?</b></p> <ul style="list-style-type: none"> <li>○ No</li> </ul>                                                                                                                                                           | No evidence identified. | <p>The feasibility to implement is dependent on many variables including access to asthma specialists, clinical</p>                                                                                                                                                                                                                                                                                                                                                                                                                                                                                                                                                                                                                                                                                                                                                                                                                                                                                                   |

|  |                                                                                                                                                |  |                                                                                                                                                                                                                                                                                                     |
|--|------------------------------------------------------------------------------------------------------------------------------------------------|--|-----------------------------------------------------------------------------------------------------------------------------------------------------------------------------------------------------------------------------------------------------------------------------------------------------|
|  | <ul style="list-style-type: none"> <li>○ Probably no</li> <li>○ Probably yes</li> <li>○ Yes</li> <li>● Varies</li> <li>○ Don't know</li> </ul> |  | <p>resources to train patients to self-administer this drug, clinical set up that allows close follow-up of patients on therapy, as well as a laboratory that can measure blood eosinophils in these patients. Patients without access to these resources are unlikely to receive this therapy.</p> |
|--|------------------------------------------------------------------------------------------------------------------------------------------------|--|-----------------------------------------------------------------------------------------------------------------------------------------------------------------------------------------------------------------------------------------------------------------------------------------------------|

# PRISMA FLOW CHARTS

Should a monoclonal anti-IL5 antibody be used in adults and children with severe asthma?

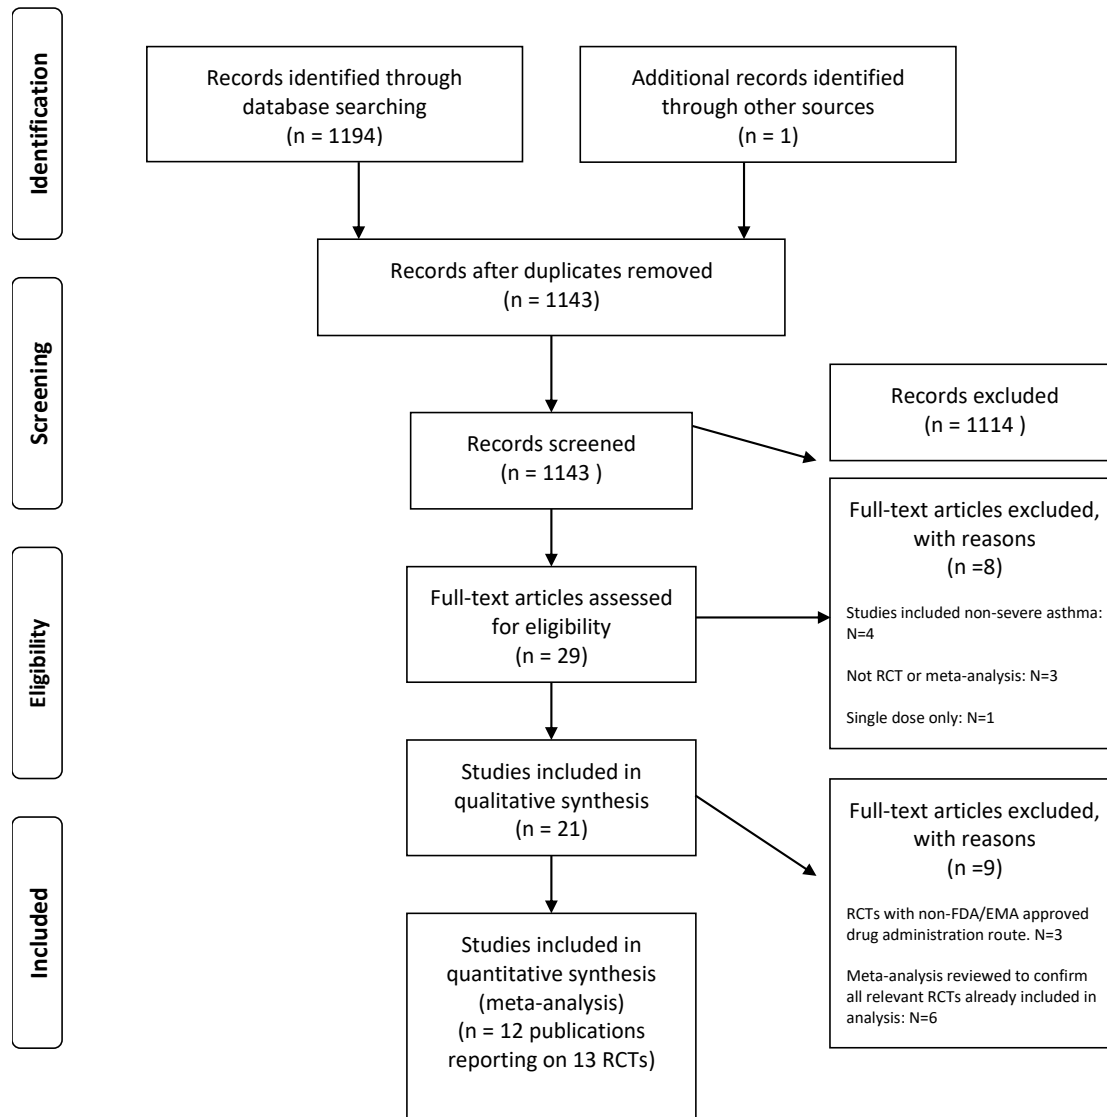



**Should a measurement of a specific biomarker be used to guide initiation of treatment with a monoclonal anti-IL5 or IL5R $\alpha$  antibody in adults and children with severe asthma? (biomarkers being exhaled NO, peripheral or sputum eosinophils, and serum periostin)**

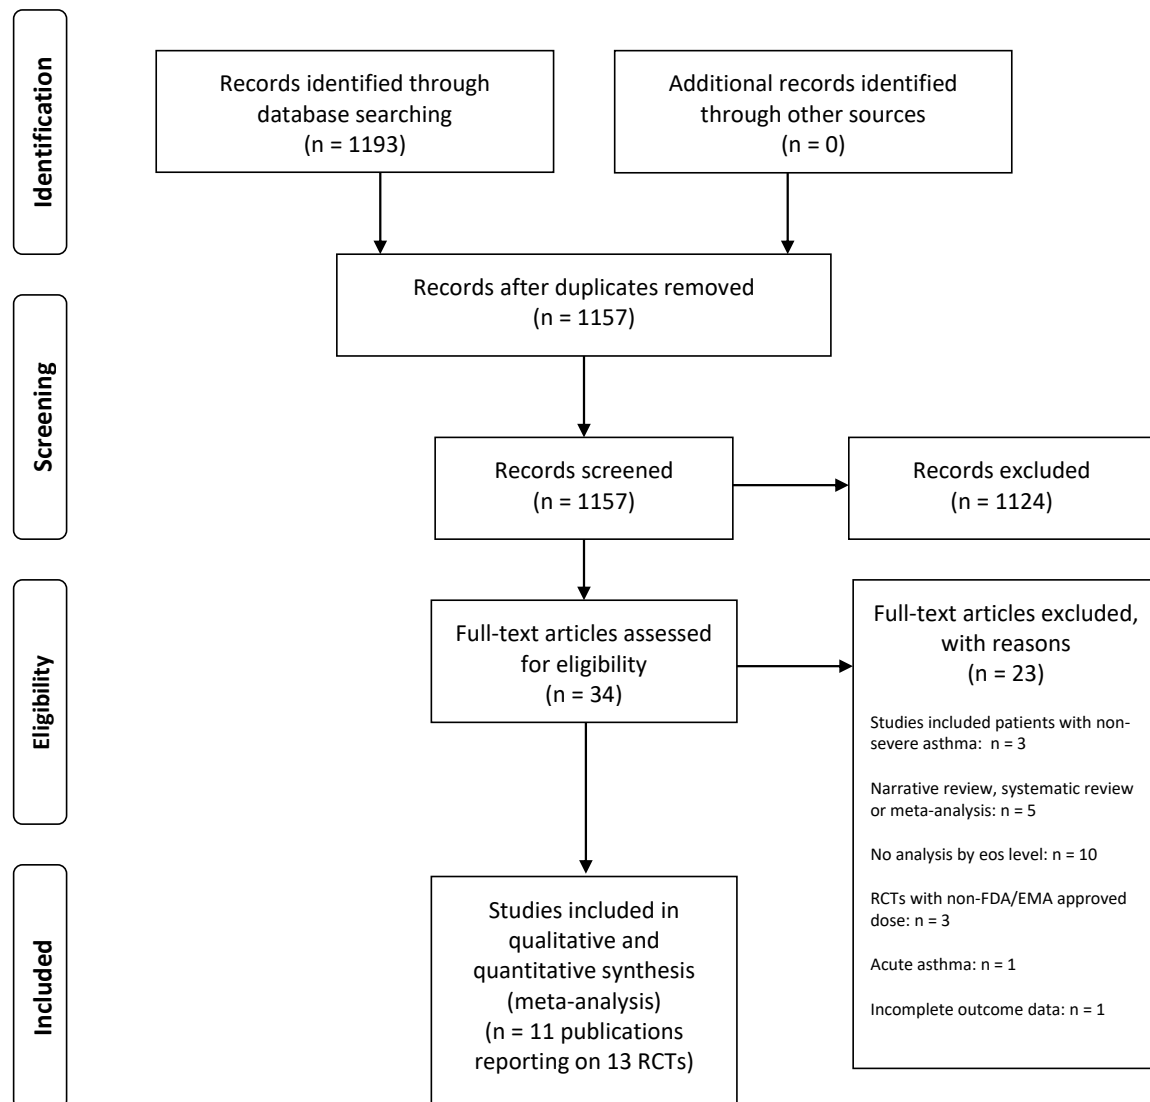

Should a measurement of a specific biomarker be used, in addition to total IgE level, to guide initiation of treatment with a monoclonal anti-IgE antibody in adults and children with severe asthma? (biomarkers being exhaled NO, peripheral or sputum eosinophils, and serum periostin)

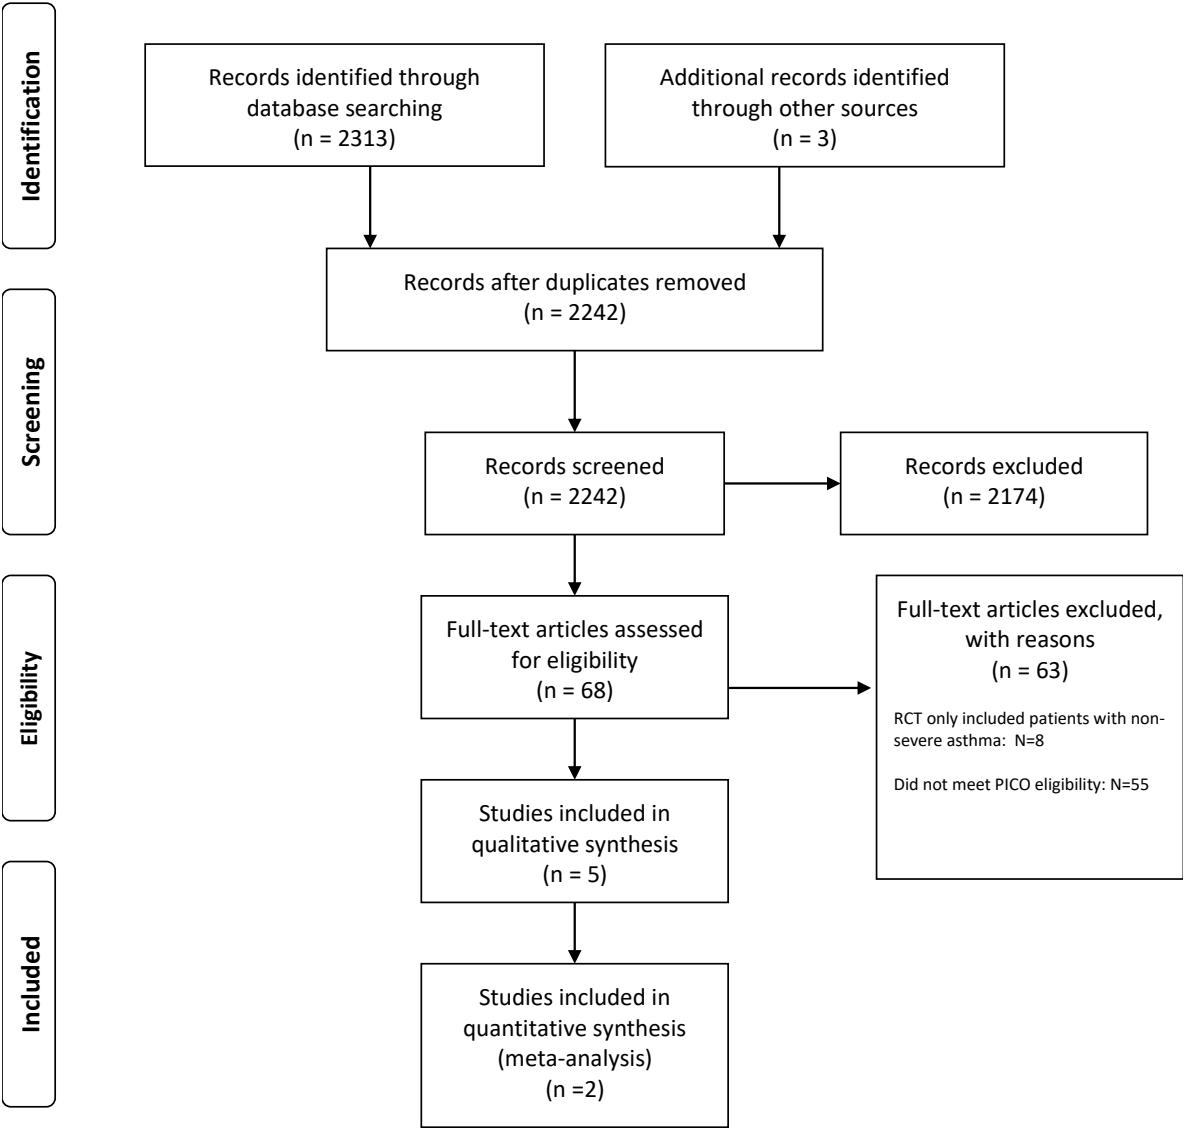



Should a long-acting inhaled muscarinic antagonist (LAMA) be used in adults and children with severe asthma?

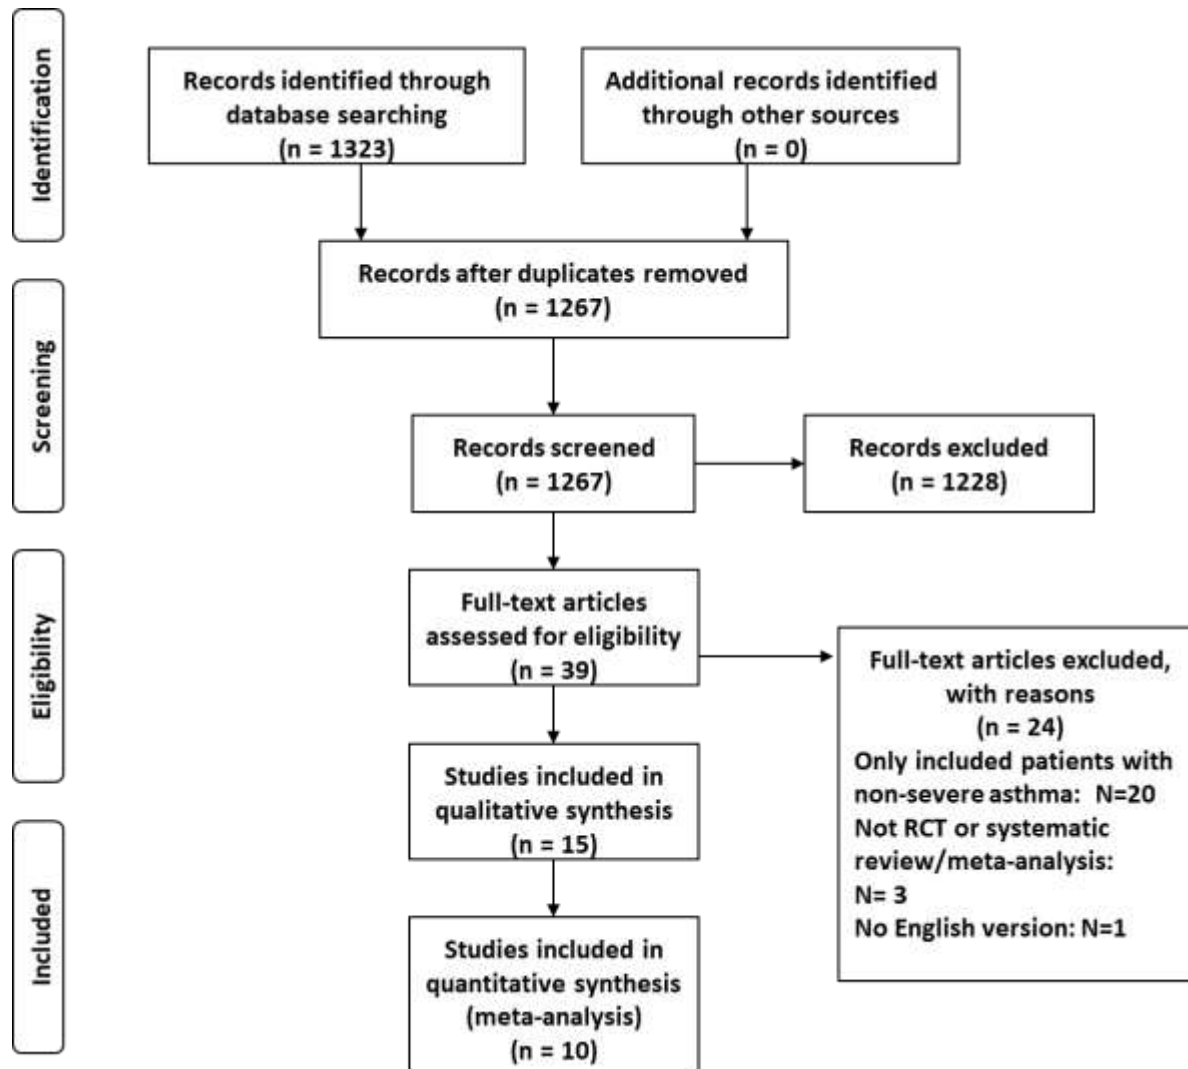

## Should a macrolide (i.e., azithromycin, clarithromycin) be used in adults and children with severe asthma?

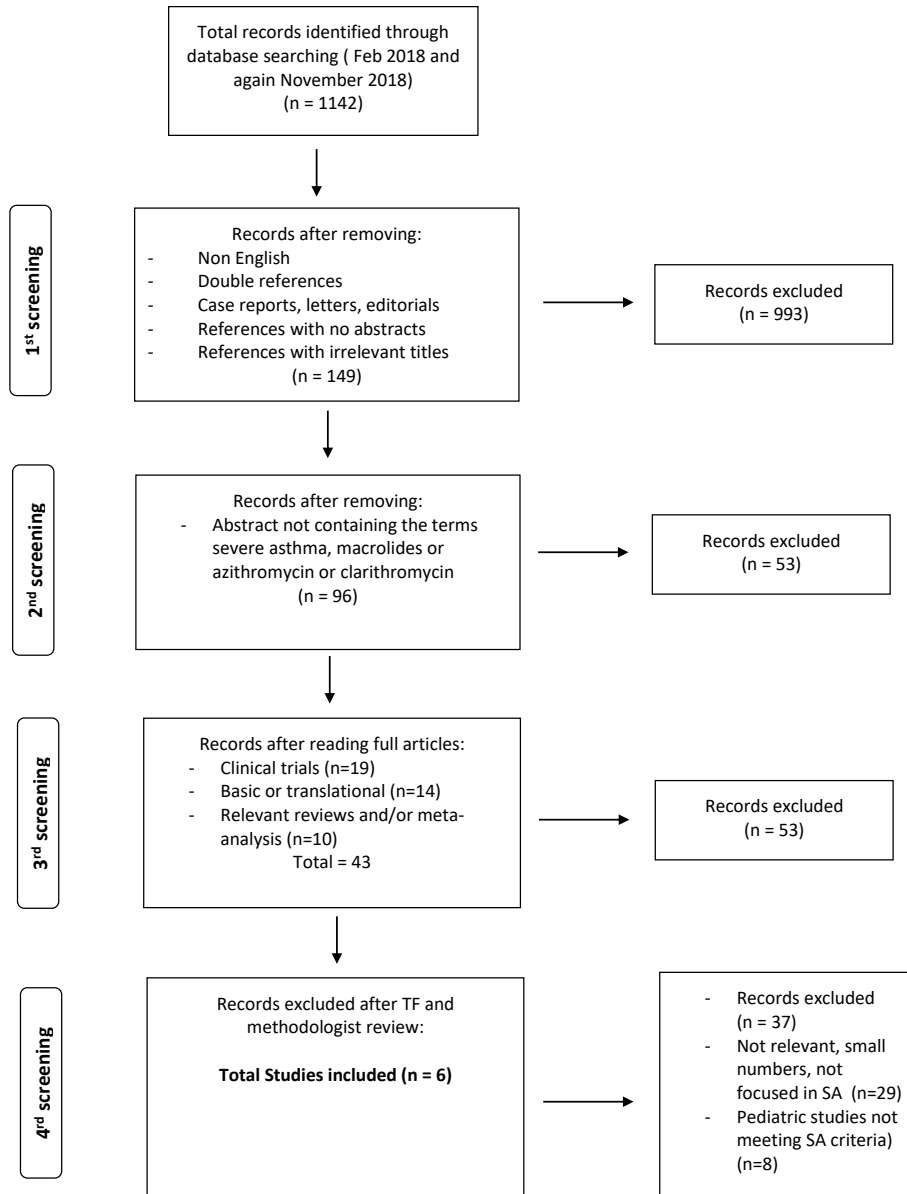

## Should an anti-interleukin 4/13 strategy be used for adults and children with severe asthma?

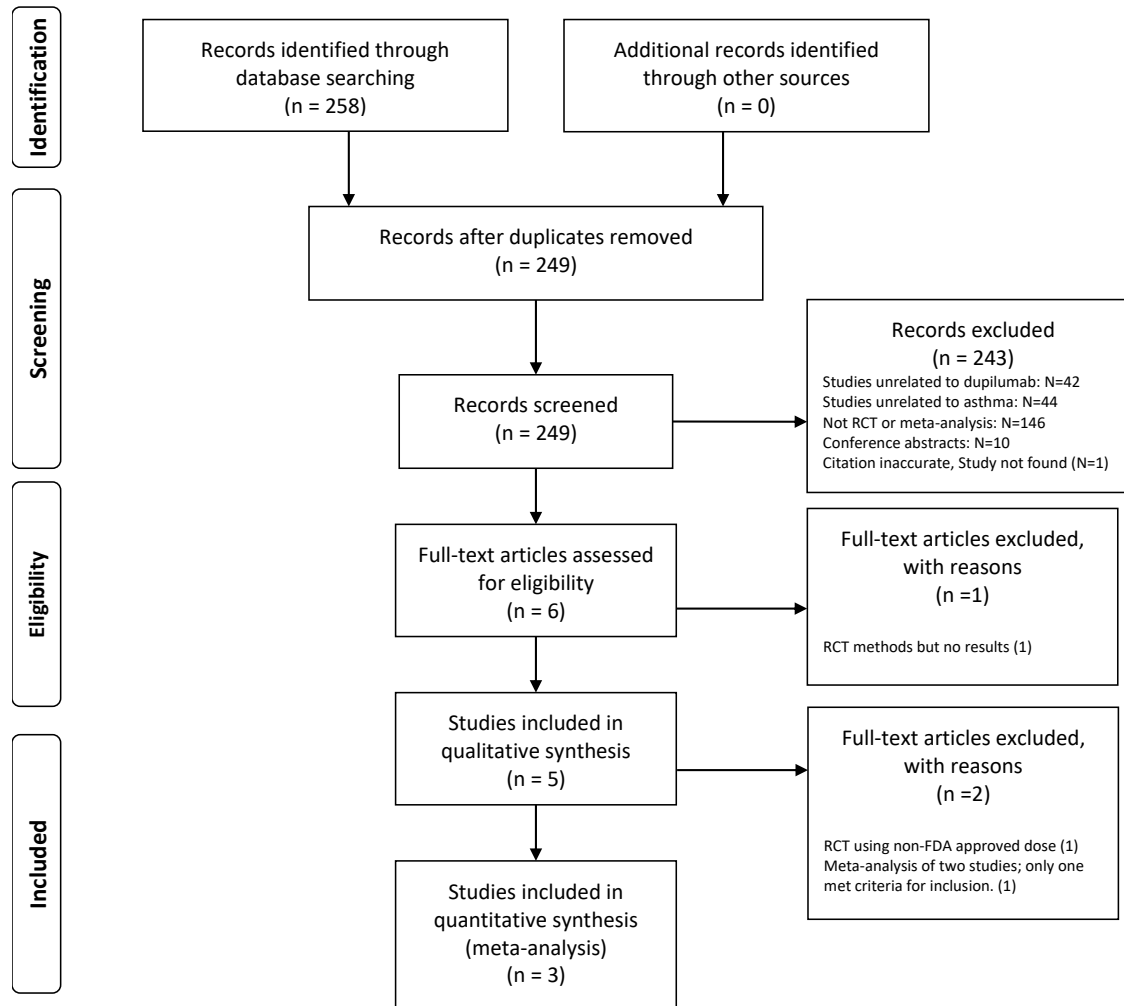

Supplement: inline-supplementary-material-1 [file inline-supplementary-material-1.pdf]
